# Supplementary material for: MAPKAP Kinase-2 Drives Expression of Angiogenic Factors by Tumor-Associated Macrophages in a Model of Inflammation-Induced Colon Cancer
Source: Front Immunol. 2021 Feb 23;11:607891. doi: 10.3389/fimmu.2020.607891 (PMC7940202; doi:10.3389/fimmu.2020.607891)
Supplement: Supplementary file 3 [file Table_1.xlsx]

## Sheet: Suppl Table 1
Supplementary Table 7. R&D protein array analytes
Coordinate	Analyte/Control	Alternate Nomenclature
A1, A2	Reference Spots	___
A5, A6	ADAMTS1	METH1
A7, A8	Amphiregulin	AR
A9, A10	Angiogenin	ANG
A11, A12	Angiopoietin-1	Ang-1
A13, A14	Angiopoietin-3	Ang-3
A15, A16	Coagulation Factor III	Tissue Factor, TF
A17, A18	CXCL16	___
A21, A22	Reference Spots	___
B3, B4	Cyr61	CCN1, IGFBP-10
B5, B6	DLL4	___
B7, B8	DPPIV	CD26
B9, B10	EGF	___
B11, B12	Endoglin	CD105
B13, B14	Endostatin/Collagen XVIII	___
B15, B16	Endothelin-1	ET-1
B17, B18	FGF acidic	FGF-1, ECGF, HBGF-1
B19, B20	FGF basic	FGF-2
C3, C4	KGF	FGF-7
C5, C6	Fractalkine	CX3CL1
C7, C8	GM-CSF	___
C9, C10	HB-EGF	___
C11, C12	HGF	Hepatopoietin A
C13, C14	IGFBP-1	___
C15, C16	IGFBP-2	___
C17, C18	IGFBP-3	___
C19, C20	IL-1α	IL-1F1
C21, C22	IL-1β	IL-1F2
D3, D4	IL-10	CSIF
D5, D6	IP-10	CXCL10, CRG-2
D7, D8	KC	CXCL1, CINC-1, GROα
D9, D10	Leptin	OB
D11, D12	MCP-1	CCL2/JE
D13, D14	MIP-1α	CCL3
D15, D16	MMP-3 (pro and mature form)	___
D17, D18	MMP-8 (pro form)	___
D19, D20	MMP-9 (pro and active form)	___
D21, D22	NOV	CCN3, IGFBP-9
E3, E4	Osteopontin	OPN
E5, E6	PD-ECGF	___
E7, E8	PDGF-AA	___
E9, E10	PDGF-AB/PDGF-BB	___
E11, E12	Pentraxin-3	PTX3, TSG-14
E13, E14	Platelet Factor 4	CXCL4, PF4
E15, E16	PlGF-2	___
E17, E18	Prolactin	PRL
E19, E20	Proliferin	___
F1, F2	Reference Spots	___
F3, F4	SDF-1	CXCL12
F5, F6	Serpin E1	PAI-1
F7, F8	Serpin F1	PEDF
F9, F10	Thrombospondin-2	TSP-2
F11, F12	TIMP-1	___
F13, F14	TIMP-4	___
F15, F16	VEGF	VPF
F17, F18	VEGF-B	VRF
F19, F20	Negative Control	Control (-)

## Sheet: Suppl Table 2
Supplementary Table 1. MK2 WT M0 macrophages vs MK2 WT M2 macrophages
	logFC	logCPM	PValue	FDR
Mgl2	4.35811	4.07907	1.92e-93	2.47e-89
Il1rl2	2.60191	3.53289	5.09e-87	3.27e-83
Retnla	10.1282	5.10249	2.09e-65	8.95e-62
Mcf2l	2.45989	4.40442	3.26e-51	1.05e-47
Ptgs1	2.41113	4.88987	6.16e-51	1.59e-47
Slc7a2	3.25738	5.75735	3.35e-50	7.17e-47
Kcnd3	7.19351	2.27808	1.6e-48	2.93e-45
Arg1	5.66217	2.3361	3.11e-48	5e-45
Wdfy2	1.2292	8.10095	1.36e-46	1.94e-43
Gm5345	4.10589	1.35372	1.43e-40	1.84e-37
Il6st	1.17076	9.12077	3.43e-38	4.01e-35
Flrt2	1.52834	7.39419	4.69e-36	5.03e-33
Gatm	1.2897	6.91665	2.48e-35	2.45e-32
Lipn	2.92789	3.91701	4.65e-35	4.27e-32
Tmem26	3.82205	5.8729	1.67e-34	1.44e-31
Rnf19b	1.56244	6.58037	1.3e-33	1.05e-30
Pou2f2	-1.86489	4.69495	1.98e-33	1.5e-30
Angptl2	1.80929	7.38792	2.26e-33	1.62e-30
Clcn5	1.02584	6.7031	2.88e-33	1.95e-30
Bhlhe40	1.61449	6.77824	7.31e-33	4.7e-30
Vwf	1.32037	6.94403	3.22e-32	1.97e-29
Bcar3	1.1022	6.02421	9.87e-32	5.77e-29
Man1a	1.27694	7.83479	2.94e-31	1.65e-28
Ksr2	1.8943	4.41879	9.18e-31	4.92e-28
Nfil3	2.15585	3.68543	1.61e-30	8.27e-28
F10	2.3439	5.46361	1.59e-29	7.84e-27
Abcd2	1.27111	5.59001	7.22e-29	3.44e-26
Fchsd2	1.26209	6.89383	8.16e-28	3.75e-25
Pdia4	1.40136	7.31943	1.22e-27	5.42e-25
Dusp4	1.55379	5.46926	1.42e-27	6.08e-25
Clec12a	-1.07399	8.26778	1.66e-27	6.9e-25
Gm8113	2.99869	2.59059	1.98e-27	7.96e-25
F7	1.74365	5.79488	2.33e-27	9.08e-25
Plekhg1	1.76421	4.29346	3.47e-27	1.31e-24
Pdcd1lg2	5.65246	2.31254	5.7e-27	2.09e-24
Chil3	3.7275	7.43136	6.89e-27	2.46e-24
Myrf	1.86648	4.36841	8.84e-27	3.07e-24
Dusp1	-1.08591	5.39126	1.78e-26	6.01e-24
Scn3a	8.53848	2.01563	2.84e-26	9.36e-24
Ak2	1.01646	6.1304	1.08e-24	3.48e-22
Ralgds	1.56257	6.29601	1.3e-24	4.07e-22
Nek6	0.810296	6.37065	2.52e-24	7.72e-22
Jak2	1.25743	6.39809	2.72e-24	8.12e-22
Gpc1	1.83135	5.39138	1.35e-23	3.94e-21
Pcid2	0.886334	4.91968	1.38e-23	3.95e-21
Tlr2	-1.63434	4.15825	2.29e-23	6.4e-21
Cldn11	6.58553	1.30129	3.86e-23	1.06e-20
Anxa4	0.764007	9.59828	4.95e-23	1.33e-20
Dhrs9	0.984862	6.48075	5.1e-23	1.34e-20
F630028O10Rik	-1.6769	4.45368	6.56e-23	1.69e-20
Fam20c	1.0866	8.864	1.78e-22	4.48e-20
Cd274	1.14087	7.85845	7.46e-22	1.84e-19
Slc36a2	5.24942	1.76815	1.04e-21	2.52e-19
Cblb	1.03094	7.95374	1.94e-21	4.63e-19
Csf2rb	1.15882	8.94741	2.23e-21	5.22e-19
Smap2	1.40034	7.7718	2.47e-21	5.6e-19
Itgb3	1.41616	7.33311	2.48e-21	5.6e-19
Ms4a4a	1.77542	6.72868	2.83e-21	6.28e-19
Rgl1	0.822779	7.43298	3.07e-21	6.69e-19
Slamf8	1.47254	5.24855	4.85e-21	1.02e-18
Pkdcc	1.91609	3.95298	4.74e-21	1.02e-18
Zcchc2	0.942122	6.33886	7.92e-21	1.64e-18
Anxa1	0.747634	10.8243	9.74e-21	1.99e-18
Ampd3	-0.878494	5.55441	1.13e-20	2.28e-18
Rrp8	0.965357	4.86911	2.86e-20	5.66e-18
Mmp19	1.14556	6.66769	3.18e-20	6.2e-18
Apol7c	4.36398	3.511	7.95e-20	1.53e-17
Proz	1.48251	2.3121	8.48e-20	1.6e-17
Inpp5a	0.979243	4.72155	1.02e-19	1.89e-17
Ddhd1	1.46834	6.6453	1.11e-19	2.04e-17
Cd14	-1.52366	5.658	1.49e-19	2.69e-17
Fam129a	-0.864568	5.39683	2.18e-19	3.9e-17
Znrf2	0.726783	7.26607	2.37e-19	4.18e-17
Cd300lb	0.686252	8.34568	3.82e-19	6.64e-17
Egr2	1.41462	6.26503	4.1e-19	7.02e-17
Plekha3	0.794126	5.84186	5.95e-19	1.01e-16
Il31ra	5.33415	0.624876	8.35e-19	1.4e-16
Flt1	2.81513	1.8095	1.23e-18	2.03e-16
Map2	3.10431	1.8553	5.35e-18	8.71e-16
Smg5	0.795864	5.21035	1.48e-17	2.38e-15
Lrrc32	1.63057	2.83332	1.54e-17	2.45e-15
Ptpre	0.794148	7.35479	1.77e-17	2.78e-15
Cln5	0.744164	6.8786	2.22e-17	3.44e-15
Ahr	1.7666	2.80439	2.34e-17	3.58e-15
Tnfrsf26	1.01159	4.74545	4.05e-17	6.12e-15
Fos	-0.862563	5.51743	4.49e-17	6.71e-15
Nabp1	1.12808	7.37913	6.87e-17	1.02e-14
Fam198b	0.791359	7.47283	9.3e-17	1.36e-14
Ccl9	0.835454	9.10515	1.03e-16	1.49e-14
Klf9	1.05889	4.51033	2.75e-16	3.93e-14
Stt3b	0.763736	7.84016	2.83e-16	3.99e-14
Bex1	2.13192	5.18846	4.49e-16	6.27e-14
Itgax	1.70302	7.92756	5.5e-16	7.61e-14
Rnase2a	6.76405	0.164065	6.39e-16	8.74e-14
Ap2m1	0.831286	9.58124	6.96e-16	9.42e-14
Rab3il1	0.792124	7.35099	9.75e-16	1.31e-13
Clec4n	-1.6395	4.7623	1.08e-15	1.43e-13
Ceacam19	2.59476	1.83037	1.53e-15	2.01e-13
Awat1	2.35241	1.92446	1.94e-15	2.52e-13
Fcgr2b	1.55888	8.4764	1.97e-15	2.54e-13
Klf4	1.6541	2.5547	2.93e-15	3.73e-13
Slc37a3	0.675724	4.98082	3.18e-15	4.01e-13
Arrb2	-0.756862	7.03233	3.96e-15	4.94e-13
Clic4	0.609486	9.84722	5.03e-15	6.22e-13
Agpat3	0.713651	6.72631	6.68e-15	8.18e-13
Gda	1.09866	4.93	1.15e-14	1.39e-12
Rab19	1.12328	2.98285	1.61e-14	1.94e-12
Arl15	0.976785	3.66343	1.65e-14	1.96e-12
Gm8221	7.8296	0.585601	1.66e-14	1.96e-12
Cish	3.2616	1.28107	1.77e-14	2.07e-12
Ptpn22	-0.885917	4.75094	2.03e-14	2.35e-12
Arap3	-1.47687	3.0921	2.2e-14	2.5e-12
Nlrp3	-1.14324	3.65363	2.19e-14	2.5e-12
Ccl7	2.57476	4.7692	2.37e-14	2.67e-12
S1pr1	-0.868552	5.85014	3.16e-14	3.53e-12
Fgl2	1.31139	5.22207	3.29e-14	3.65e-12
Fgd3	-0.606369	5.41245	3.84e-14	4.22e-12
Tspan5	0.839785	4.80008	4.14e-14	4.51e-12
Atp6v0a1	0.615028	9.91095	4.54e-14	4.91e-12
Camk1d	-0.662867	5.08772	4.64e-14	4.97e-12
Matk	1.25763	4.75638	4.75e-14	5.05e-12
Retreg1	-0.890673	5.39821	5.55e-14	5.85e-12
Fnbp1	-0.647191	7.32743	5.7e-14	5.96e-12
Atf3	0.623421	9.09817	8.96e-14	9.3e-12
Dnmt3a	0.596543	8.83849	1.14e-13	1.18e-11
Ptger2	1.2196	3.83192	1.27e-13	1.3e-11
Elk3	-0.625967	4.98148	1.48e-13	1.5e-11
Clec4d	-0.642228	8.52478	1.68e-13	1.69e-11
Mrc1	0.75748	10.3665	2.66e-13	2.66e-11
Sgk1	1.1498	6.44323	2.98e-13	2.95e-11
B3gnt7	1.15726	2.89491	3.19e-13	3.13e-11
Aldh1b1	1.00335	4.13324	3.46e-13	3.37e-11
Marcksl1	-1.66518	2.40537	3.77e-13	3.65e-11
Slc40a1	-0.791508	9.0802	5.15e-13	4.93e-11
Htr2a	1.67192	2.67493	5.18e-13	4.93e-11
Sestd1	0.581376	6.73778	5.83e-13	5.51e-11
Fam214a	-0.750503	5.17961	5.99e-13	5.63e-11
Serpinb9b	1.25823	2.98908	7.81e-13	7.28e-11
Tmem202	0.967269	3.31271	9.07e-13	8.39e-11
Scd2	0.95387	7.01697	9.2e-13	8.45e-11
Focad	0.821236	4.36207	9.94e-13	9e-11
Psmb10	1.19717	5.30115	9.93e-13	9e-11
Csf2rb2	0.707995	9.01771	1.01e-12	9.11e-11
Ccr1	0.693754	7.07629	1.02e-12	9.15e-11
Dse	0.516538	7.46958	1.08e-12	9.61e-11
Olfm1	1.12183	2.93122	1.09e-12	9.62e-11
Ncapg2	-0.917916	5.72586	1.17e-12	1.02e-10
Lpxn	0.812178	7.1046	1.18e-12	1.03e-10
Tmem268	0.753162	5.33655	1.82e-12	1.57e-10
Ldlrad3	0.886033	4.5741	1.84e-12	1.58e-10
Gpr34	-1.54722	2.94797	1.86e-12	1.59e-10
Plekhf1	1.96007	1.83338	2.59e-12	2.19e-10
Stxbp3	0.797196	6.76954	2.74e-12	2.3e-10
Gadd45b	0.665613	6.10588	3.33e-12	2.78e-10
Cd9	0.607914	8.79026	3.46e-12	2.87e-10
Bcap31	0.545087	7.92205	3.57e-12	2.95e-10
Tanc2	0.836919	6.6343	4.8e-12	3.93e-10
Itgb8	2.50209	1.48388	5.15e-12	4.19e-10
Ints6l	-0.810307	5.65095	6.1e-12	4.93e-10
Slc16a10	-0.565888	6.83104	6.54e-12	5.25e-10
Emp1	0.560137	9.21072	7.53e-12	6.02e-10
Tarm1	3.30936	0.5373	8.73e-12	6.93e-10
Ahnak	0.646907	10.726	1.01e-11	7.95e-10
Ier3	1.74723	3.87968	1.09e-11	8.52e-10
Tfrc	0.8946	11.4052	1.1e-11	8.59e-10
Irf4	2.04622	1.71458	1.11e-11	8.59e-10
Fcrl1	-1.67653	1.56891	1.23e-11	9.45e-10
Oxct1	0.528663	8.00249	1.31e-11	1e-09
Irf1	0.926169	5.95844	1.71e-11	1.3e-09
Gnb4	0.838913	4.40797	1.85e-11	1.4e-09
Tent5c	0.70542	5.01585	2.12e-11	1.59e-09
Fmnl1	-0.922201	5.82785	2.56e-11	1.91e-09
Ssh2	-0.860438	4.02137	2.78e-11	2.07e-09
Ifit3	-1.52741	3.52301	2.84e-11	2.1e-09
Rnf150	-0.567675	6.9697	3.09e-11	2.27e-09
Ctla2b	-1.71588	3.69376	3.2e-11	2.34e-09
Sema4d	-0.616402	8.00176	3.38e-11	2.45e-09
Tifab	0.811016	5.57662	3.94e-11	2.85e-09
Dcbld2	0.70563	4.78723	4.32e-11	3.1e-09
Limd2	-0.741369	5.21648	4.56e-11	3.25e-09
Aff1	0.526841	7.61949	4.63e-11	3.29e-09
Dhcr7	0.7577	4.85727	4.72e-11	3.33e-09
Pcp4l1	-1.52496	5.48386	5.24e-11	3.66e-09
Fyn	0.719836	5.77637	5.23e-11	3.66e-09
Stk17b	-0.713275	5.93934	5.52e-11	3.84e-09
Cnr2	0.644217	5.38597	6.17e-11	4.24e-09
Cgnl1	-0.780103	4.4846	6.21e-11	4.25e-09
Ric1	0.570513	6.02544	6.26e-11	4.26e-09
Cep85	-0.82506	5.6832	7.28e-11	4.93e-09
Fosl2	0.642442	5.42096	7.86e-11	5.3e-09
Pkp2	1.61028	3.12012	8.74e-11	5.85e-09
Gsap	-0.766563	3.98157	9.24e-11	6.16e-09
Arhgap6	0.879073	5.5293	9.54e-11	6.32e-09
Dennd1c	-0.766312	4.29077	1.43e-10	9.4e-09
Ahcyl2	0.522097	6.94366	1.45e-10	9.52e-09
Fgd2	-1.00201	3.67598	1.46e-10	9.56e-09
Basp1	-0.746575	7.6428	1.76e-10	1.14e-08
Dock4	0.621169	4.98698	1.76e-10	1.14e-08
Aif1	-0.79246	4.92551	1.92e-10	1.24e-08
Xylt2	-0.669839	6.26557	2.39e-10	1.52e-08
Ptgir	1.10441	3.3543	2.39e-10	1.52e-08
Pid1	-0.700156	7.22952	2.48e-10	1.57e-08
Fyb	-0.799054	8.40803	2.66e-10	1.68e-08
Smad3	-0.760715	3.63965	2.7e-10	1.69e-08
Ptger4	-0.896659	2.63119	3.04e-10	1.9e-08
Slamf9	-0.843526	3.83069	3.11e-10	1.93e-08
Gng11	0.71772	4.08101	3.1e-10	1.93e-08
Gm14221	-1.65703	2.24586	3.51e-10	2.15e-08
Rasgef1b	-0.576667	7.0021	3.84e-10	2.33e-08
Sdc4	0.914095	7.71567	3.89e-10	2.35e-08
Abcg3	-0.966167	3.4387	4.09e-10	2.46e-08
Lsp1	-1.19038	4.76678	4.18e-10	2.5e-08
Lrrc8b	0.619682	5.09276	4.42e-10	2.63e-08
Eif5a	0.534391	8.61226	4.68e-10	2.77e-08
Aifm2	0.757348	4.41917	5.22e-10	3.08e-08
Tmem144	0.677293	4.53738	5.67e-10	3.33e-08
Atp1a3	0.617172	7.96887	6.72e-10	3.93e-08
Pparg	0.554314	6.75421	6.81e-10	3.96e-08
Slc25a37	-0.674865	5.09818	7.25e-10	4.2e-08
Ctnnb1	0.547137	8.84993	8.94e-10	5.16e-08
Fn1	1.50754	7.21052	9e-10	5.17e-08
Hck	-0.520046	5.59318	9.46e-10	5.41e-08
Adra1a	-0.703743	5.60008	9.73e-10	5.54e-08
Rcbtb2	-0.573323	7.3843	9.88e-10	5.6e-08
Cd44	0.518688	9.59052	1.02e-09	5.75e-08
Gm6209	1.39917	2.3928	1.06e-09	5.98e-08
Igfbp4	-1.04202	6.4234	1.08e-09	6.03e-08
Alas1	0.588836	7.40816	1.1e-09	6.14e-08
Cybb	-0.605517	9.08789	1.22e-09	6.74e-08
Ear2	2.35768	3.30921	1.27e-09	7.02e-08
Wwp1	-0.684783	8.74733	1.33e-09	7.31e-08
Tfec	0.561939	5.18348	1.34e-09	7.31e-08
E330009J07Rik	0.826103	3.51812	1.44e-09	7.84e-08
Hfe	0.679971	5.80748	1.54e-09	8.35e-08
Phospho1	1.28407	4.98787	1.56e-09	8.45e-08
S1pr3	1.63958	0.520629	1.6e-09	8.64e-08
Ccl12	2.29469	1.22062	1.7e-09	9.1e-08
Lpcat2	-1.0029	4.35144	1.75e-09	9.32e-08
Evi2a	-0.613008	7.46783	2.13e-09	1.13e-07
Prkcd	0.575281	8.37878	2.22e-09	1.16e-07
Prps1	1.05842	3.80816	2.21e-09	1.16e-07
Clec4a3	0.771073	6.89562	2.25e-09	1.18e-07
Klhl6	-0.715921	3.91475	2.37e-09	1.23e-07
Adgre4	-1.86186	1.54433	2.49e-09	1.29e-07
Fgd6	0.597143	6.39513	2.59e-09	1.33e-07
Pla2g5	2.35762	1.05076	2.66e-09	1.36e-07
Havcr2	-0.81484	4.84111	3.11e-09	1.58e-07
Mgat1	0.860454	6.96623	3.49e-09	1.77e-07
Slc7a11	0.881838	4.92491	3.69e-09	1.86e-07
Atp8b4	-0.822993	6.54238	3.83e-09	1.92e-07
Lpin2	-0.520225	6.22996	4.16e-09	2.08e-07
Lpar6	-0.776771	5.14508	4.34e-09	2.15e-07
Lilr4b	-0.658655	9.63894	4.31e-09	2.15e-07
Rhobtb1	-0.874919	3.29455	4.47e-09	2.2e-07
Il11ra1	1.0107	6.11504	4.44e-09	2.2e-07
Gab3	-0.793385	3.17465	4.98e-09	2.44e-07
Tbc1d16	0.799176	3.851	5.29e-09	2.59e-07
Ms4a6b	-0.641112	5.20574	6.02e-09	2.92e-07
Pdgfa	0.61101	4.41598	6.17e-09	2.99e-07
Arhgap18	-0.574773	7.59387	6.5e-09	3.13e-07
Hk2	0.656942	5.73712	7.18e-09	3.45e-07
Sh3pxd2a	-0.532049	5.03185	8.41e-09	4.02e-07
Plekhg3	-0.522962	4.9134	1.03e-08	4.87e-07
Rps6kc1	0.566481	5.48734	1.02e-08	4.87e-07
Fam129b	0.644881	9.6506	1.06e-08	4.97e-07
Rasgrp1	3.06467	-0.0579356	1.05e-08	4.97e-07
Clec7a	0.872001	10.0509	1.1e-08	5.15e-07
Hvcn1	0.629944	7.69531	1.14e-08	5.33e-07
AU020206	0.521417	5.46625	1.18e-08	5.46e-07
Gpt2	0.595869	4.70505	1.19e-08	5.46e-07
Ncf4	0.66473	6.14022	1.18e-08	5.46e-07
Tm4sf19	1.00752	3.42711	1.22e-08	5.56e-07
Cxcr3	-1.49943	1.49038	1.25e-08	5.66e-07
Gng2	-0.551213	7.30344	1.25e-08	5.67e-07
Nanos1	-1.33717	2.57253	1.46e-08	6.55e-07
Dnah2	1.2107	3.10279	1.58e-08	7.07e-07
Pde3b	-0.831221	3.62473	1.64e-08	7.31e-07
Colgalt1	0.532302	7.95642	1.68e-08	7.46e-07
Jcad	0.875998	3.93815	1.73e-08	7.66e-07
Nuak1	-0.815051	3.66728	1.74e-08	7.68e-07
Fnbp1l	-0.737266	4.95798	1.85e-08	8.1e-07
Tusc3	0.631868	5.28138	1.95e-08	8.54e-07
Abcg1	0.646273	8.63848	2.04e-08	8.85e-07
Ctsl	0.708066	12.1616	2.36e-08	1.01e-06
Arl4c	0.587957	6.55884	2.56e-08	1.1e-06
Sntb2	-0.513682	5.47796	2.72e-08	1.15e-06
Cbl	0.518721	8.59511	2.71e-08	1.15e-06
Gm13431	1.35882	1.32592	2.84e-08	1.2e-06
Nfatc2	-0.625379	4.97704	2.95e-08	1.24e-06
Ldlr	0.579164	6.64803	3.08e-08	1.29e-06
C3	1.16594	4.6419	3.57e-08	1.49e-06
Rras2	0.973511	3.63709	3.75e-08	1.57e-06
Nfxl1	-0.584584	4.42511	3.98e-08	1.65e-06
Clstn1	0.510738	5.63642	3.98e-08	1.65e-06
Slc30a4	0.656027	5.029	4.11e-08	1.7e-06
Hbegf	0.885554	2.68047	4.18e-08	1.72e-06
P2ry14	0.645679	4.89649	4.24e-08	1.74e-06
Ankle1	-1.34952	1.54058	4.46e-08	1.83e-06
Esd	0.505913	8.81247	4.69e-08	1.91e-06
Gas6	-0.653667	8.51688	4.73e-08	1.92e-06
Ttyh2	0.539402	7.46508	4.78e-08	1.94e-06
Cd52	0.536245	6.87449	5.75e-08	2.31e-06
Lig1	-0.866428	4.89453	5.9e-08	2.36e-06
Pcyt1b	-1.66063	1.02442	6.85e-08	2.73e-06
Wsb2	0.587595	7.6505	7.26e-08	2.87e-06
Ifit2	-1.21056	4.69825	7.83e-08	3.08e-06
Ccl3	-0.923173	5.54272	8.05e-08	3.16e-06
Nap1l1	-0.571574	8.05948	8.58e-08	3.35e-06
Lgals3	0.535358	12.2483	8.84e-08	3.45e-06
Ahnak2	0.551421	8.06728	8.96e-08	3.48e-06
Prickle2	1.01212	2.26249	9.57e-08	3.7e-06
Tpcn2	0.517375	6.63424	9.75e-08	3.75e-06
Maf	-0.639729	8.42206	1.04e-07	3.97e-06
Cd151	0.558312	6.22502	1.05e-07	3.99e-06
Ptchd1	-1.14641	2.52165	1.1e-07	4.14e-06
Slc39a8	-0.680958	4.01013	1.11e-07	4.17e-06
Slc15a3	0.520482	8.88906	1.13e-07	4.25e-06
Pilrb1	-2.02258	0.834372	1.17e-07	4.36e-06
Tbc1d31	-0.79048	4.21214	1.17e-07	4.36e-06
Tspan14	0.554614	7.07794	1.21e-07	4.49e-06
Evi2b	-0.903688	7.65505	1.21e-07	4.5e-06
5830432E09Rik	0.756267	3.07481	1.24e-07	4.58e-06
Atp6v1b2	0.612209	10.4757	1.31e-07	4.84e-06
Ak8	0.696674	4.4047	1.43e-07	5.27e-06
Plek	0.560853	10.7226	1.45e-07	5.33e-06
Cemip	0.894944	1.49287	1.49e-07	5.44e-06
Sh3bp5	-0.511096	6.46082	1.58e-07	5.76e-06
Ctsk	0.608016	4.98805	1.71e-07	6.21e-06
Ap2a2	0.540242	7.75644	1.78e-07	6.41e-06
Sod3	1.59813	0.229047	1.8e-07	6.48e-06
Rgs1	-0.750051	7.24051	1.98e-07	7.1e-06
Trim24	-0.561554	4.08379	2e-07	7.14e-06
Ccl4	-0.997784	4.84134	2.06e-07	7.32e-06
Pilra	-1.32363	2.83438	2.07e-07	7.35e-06
Oas2	-1.18195	3.76676	2.11e-07	7.44e-06
Lmna	0.551192	7.81163	2.12e-07	7.46e-06
Cped1	-1.0674	2.32281	2.38e-07	8.33e-06
Fcgr1	-0.527994	6.54593	2.73e-07	9.52e-06
Gm15655	-0.707115	4.64827	2.95e-07	1.02e-05
Cx3cr1	-2.61102	-0.151668	3.2e-07	1.1e-05
Kif15	-1.04356	3.87785	3.27e-07	1.13e-05
Spn	-0.981199	3.02201	3.32e-07	1.13e-05
Nfkbia	-0.572025	4.21434	3.32e-07	1.13e-05
P2ry1	0.757256	3.75415	3.33e-07	1.13e-05
Itga9	-0.664852	3.53582	3.47e-07	1.18e-05
Gm15760	1.04947	2.09372	3.51e-07	1.19e-05
Fdps	0.653712	4.93024	3.57e-07	1.2e-05
Nyap2	1.97074	1.3227	4.03e-07	1.35e-05
B830042I05Rik	1.38905	5.26092	4.1e-07	1.37e-05
Ccl6	0.600587	9.22673	4.19e-07	1.4e-05
Stab1	-0.731247	8.46488	4.28e-07	1.42e-05
Gm47123	0.916315	4.0812	4.26e-07	1.42e-05
Sdc1	0.882411	5.49	4.34e-07	1.44e-05
Sqle	0.568704	6.02135	4.38e-07	1.45e-05
Nt5dc3	0.548531	5.50702	4.56e-07	1.5e-05
Ckap2	-1.14523	3.1907	4.99e-07	1.62e-05
Tex9	2.25708	1.19397	5.19e-07	1.68e-05
Gpr162	-0.714859	5.0781	5.26e-07	1.69e-05
Baiap2	0.52801	6.01268	5.23e-07	1.69e-05
Dnmt3aos	0.691846	3.66654	5.22e-07	1.69e-05
Clec4e	-1.62886	1.94584	5.49e-07	1.75e-05
Plk3	1.07725	2.71947	5.48e-07	1.75e-05
B3galnt1	-0.527921	5.07249	5.64e-07	1.79e-05
H2-T23	0.644976	7.15972	5.64e-07	1.79e-05
Tlr9	-0.789162	3.1923	5.89e-07	1.85e-05
4933439C10Rik	-1.06834	2.13001	6.15e-07	1.92e-05
Nlrc3	-0.683515	3.49721	6.37e-07	1.98e-05
Abca9	-0.808251	4.10593	6.47e-07	1.99e-05
H2-DMa	0.865337	3.38773	6.47e-07	1.99e-05
Map3k5	-0.647837	3.41854	6.52e-07	2e-05
Dlg3	0.579123	4.41409	6.63e-07	2.02e-05
Csrnp1	1.017	2.52592	6.68e-07	2.04e-05
Iqgap2	-0.572689	6.3014	6.77e-07	2.05e-05
Mitf	0.535433	7.26153	6.74e-07	2.05e-05
Klhl33	1.65654	0.580737	6.92e-07	2.09e-05
Psap	0.531992	14.3014	7.03e-07	2.12e-05
Bub1b	-0.850573	4.46973	7.22e-07	2.18e-05
Abcb4	-0.686515	4.48636	7.39e-07	2.21e-05
Pmp22	-0.52462	8.76947	7.86e-07	2.34e-05
Slfn8	-0.518676	5.13907	7.9e-07	2.34e-05
Ankrd55	0.999396	3.03644	7.98e-07	2.36e-05
Mvd	0.722559	3.62301	8.09e-07	2.39e-05
Dusp18	0.889986	2.38818	8.88e-07	2.59e-05
Pole	-0.906477	3.90226	8.98e-07	2.62e-05
Slc18a1	0.704152	3.67357	9.03e-07	2.63e-05
Sncaip	-1.82106	1.58584	9.6e-07	2.79e-05
Knstrn	-1.13413	3.69509	9.98e-07	2.89e-05
Pld4	-0.55329	6.27772	1.01e-06	2.93e-05
Hpgds	-0.550217	8.41123	1.04e-06	3e-05
Selenop	-0.659003	11.9782	1.06e-06	3.04e-05
Dkk2	-1.64975	0.120577	1.1e-06	3.15e-05
Lat	0.967392	2.18633	1.1e-06	3.15e-05
Iqgap3	-0.876097	4.35168	1.11e-06	3.17e-05
1700047I17Rik2	7.3996	2.46068	1.11e-06	3.17e-05
Mfsd6	-0.521137	5.10863	1.13e-06	3.22e-05
Ndc80	-0.995574	4.05423	1.27e-06	3.57e-05
Sez6l2	-1.29007	1.53084	1.34e-06	3.75e-05
Tmem176b	-0.880203	2.96494	1.43e-06	3.98e-05
Birc5	-0.927986	4.08453	1.46e-06	4.07e-05
Kif3a	-0.507369	6.4468	1.5e-06	4.18e-05
Tapbp	0.562906	8.10811	1.55e-06	4.28e-05
Pot1b	-0.632508	3.90873	1.56e-06	4.3e-05
Psme2	0.566792	6.23835	1.56e-06	4.3e-05
Rps6ka5	-0.761299	2.79955	1.61e-06	4.4e-05
Acp5	1.16491	4.27769	1.78e-06	4.83e-05
Mllt3	0.555267	3.77298	1.82e-06	4.92e-05
Magi3	-0.741303	2.85382	1.85e-06	5e-05
Tceal9	0.702066	7.7041	1.85e-06	5e-05
AC166110.3	-1.26865	3.15998	2.01e-06	5.39e-05
Slc30a1	0.505683	7.48009	2.04e-06	5.44e-05
Nr4a1	-1.2868	0.754994	2.09e-06	5.57e-05
Batf3	1.49439	1.87035	2.12e-06	5.64e-05
Iah1	0.634925	4.65965	2.22e-06	5.88e-05
Rin3	0.570424	5.44977	2.22e-06	5.89e-05
St3gal6	-1.95732	0.85478	2.26e-06	5.97e-05
Oit3	0.654365	4.04642	2.32e-06	6.11e-05
Hk3	0.58208	8.64998	2.48e-06	6.49e-05
Prr11	-1.01562	4.25498	2.69e-06	6.99e-05
Socs1	2.18415	0.912108	2.73e-06	7.07e-05
Nectin4	-0.537398	3.58635	2.75e-06	7.13e-05
Svep1	1.68135	0.380231	2.78e-06	7.18e-05
Tmem37	0.957728	3.99299	2.86e-06	7.37e-05
Rnasel	-0.57017	7.007	3.02e-06	7.73e-05
Parp8	-0.559949	3.96329	3.08e-06	7.87e-05
Slfn9	-0.846841	5.70882	3.3e-06	8.34e-05
Adhfe1	1.31757	0.764088	3.3e-06	8.34e-05
Sh3tc1	0.588983	5.36448	3.37e-06	8.51e-05
Azin2	1.3091	1.16614	3.55e-06	8.95e-05
Hmgcs1	0.555672	7.39607	3.57e-06	8.97e-05
Nfkbie	-0.685511	2.65306	3.59e-06	9.02e-05
Tsc22d3	0.513389	6.2205	3.66e-06	9.17e-05
F630040K05Rik	1.24407	3.23134	3.75e-06	9.37e-05
F13a1	-0.911641	2.60583	3.78e-06	9.43e-05
Arhgef39	-1.10132	1.79034	3.88e-06	9.66e-05
Numbl	0.66643	2.96214	3.98e-06	9.89e-05
Plxdc2	0.830697	4.86511	4.06e-06	0.000100844
Gm4739	-1.24759	2.99197	4.16e-06	0.00010272
Ifit3b	-1.85469	1.29763	4.28e-06	0.000105366
Auh	0.520124	4.33909	4.54e-06	0.000111255
Espl1	-0.830001	3.28358	4.79e-06	0.000117004
Map3k9	-0.825341	2.77004	4.93e-06	0.00012041
Cdk20	0.603617	4.83655	5.01e-06	0.000121765
Prc1	-0.858771	5.49132	5.21e-06	0.000125854
Cisd1	0.751538	4.1857	5.28e-06	0.000127491
Lcp2	-0.524376	6.45417	5.33e-06	0.00012829
Kif20a	-0.84413	4.85396	5.39e-06	0.000129458
Frat2	-1.11676	1.7527	5.41e-06	0.000129794
Rhov	0.502694	4.48897	5.42e-06	0.000129877
Cxcl10	-1.97669	0.0587174	5.44e-06	0.00012994
Abcb1b	-0.640698	5.11741	5.77e-06	0.000137384
Ablim1	1.87978	0.386228	5.89e-06	0.000139961
Gm42793	-1.07599	2.01572	5.96e-06	0.000141338
Cenph	-1.04752	2.1615	6.08e-06	0.000143844
9930111J21Rik2	-0.813469	7.21491	6.63e-06	0.000155857
Icosl	-1.58018	0.856149	6.82e-06	0.000159484
Adrb2	-1.21396	1.87608	6.8e-06	0.000159484
Rnd3	-1.10679	1.7655	6.91e-06	0.000160889
Cd33	-0.79882	3.81716	6.95e-06	0.000161706
Col4a1	-0.53482	3.14464	7.11e-06	0.000165044
Smtn	-1.05981	2.11994	7.13e-06	0.000165223
Fhod1	-0.548003	4.45456	7.21e-06	0.000166682
Pdgfb	-0.646502	5.09079	7.23e-06	0.000166847
Cenpe	-0.929911	5.32813	7.44e-06	0.000170854
Nusap1	-1.00448	4.47448	7.56e-06	0.000173235
Plscr4	-0.558647	4.178	7.6e-06	0.00017397
Vipr1	1.5659	1.20789	8.53e-06	0.000192849
Snn	0.634647	3.7736	8.6e-06	0.000193692
Ppargc1b	1.07139	1.46119	8.93e-06	0.000200129
Lilrb4a	-0.929668	9.04126	9e-06	0.00020068
Pi4k2a	0.534713	7.38657	9e-06	0.00020068
Ckap2l	-1.0016	4.107	9.13e-06	0.000203053
Traf3ip3	-1.11168	2.39092	9.73e-06	0.000216204
Tmem150b	-1.17844	1.31727	9.95e-06	0.000220326
Cdk14	-0.629292	6.36609	1e-05	0.000222025
Knl1	-0.969926	4.02558	1.03e-05	0.000226221
Trpm2	-0.844365	1.99517	1.03e-05	0.000226221
Gmfg	-0.603781	4.30731	1.04e-05	0.000228902
Serpine2	-0.928726	3.63392	1.07e-05	0.000234484
Psip1	-0.738954	4.45013	1.1e-05	0.00023954
Map4k2	-0.524668	3.67207	1.12e-05	0.000242861
Atp6v0d2	0.580198	10.7964	1.12e-05	0.000243392
Ndrg1	-0.548084	5.25285	1.14e-05	0.000246469
Malt1	0.503269	5.7145	1.15e-05	0.000248732
Ncaph	-0.910729	4.3441	1.17e-05	0.000252199
Sema4b	0.630537	3.98394	1.18e-05	0.000255176
Ccnb2	-0.950294	3.93227	1.23e-05	0.000264503
E2f2	-0.864278	3.06067	1.25e-05	0.000268762
Brca2	-0.660235	3.37689	1.33e-05	0.000283115
Aoah	-0.625982	4.79754	1.35e-05	0.000287574
Ak4	0.889484	1.4794	1.35e-05	0.000287574
Rad51c	-1.45701	0.706171	1.4e-05	0.000295256
Acpp	1.22289	2.68001	1.41e-05	0.000296698
Scimp	1.8887	0.421635	1.44e-05	0.000301904
Mad2l1	-0.677232	4.96698	1.45e-05	0.000302122
Map4k1	0.801504	2.60776	1.47e-05	0.000304522
Sorbs3	-0.661215	3.03636	1.48e-05	0.000307106
Aspm	-0.934188	4.25531	1.52e-05	0.00031253
Pilrb2	-1.57825	1.44482	1.52e-05	0.000313429
Shld1	0.833523	3.9638	1.55e-05	0.000318305
Fam124a	1.33422	2.03806	1.56e-05	0.00031857
Ccdc18	-1.34178	1.17231	1.59e-05	0.00032509
Cdca2	-0.960164	3.19796	1.61e-05	0.00032755
Ska2	-0.938251	3.24069	1.63e-05	0.000331233
Atad2	-0.61302	5.82844	1.64e-05	0.000331783
Gm15601	1.21562	1.7797	1.64e-05	0.000332417
Card11	-1.06261	3.62963	1.65e-05	0.000333587
Arhgap4	-0.527724	4.40617	1.65e-05	0.000333587
Serpine1	-0.74412	4.21846	1.67e-05	0.000337575
Neil3	-0.942014	2.93749	1.74e-05	0.000348699
I830077J02Rik	-0.830147	2.43525	1.73e-05	0.000348699
Gm6377	-1.31017	2.59903	1.75e-05	0.000351149
Neurl3	-0.508068	6.5448	1.76e-05	0.000352063
Nfkbiz	-1.13073	1.52447	1.82e-05	0.00036225
Racgap1	-0.835577	5.1501	1.82e-05	0.00036225
Ralgps2	-0.679912	2.76682	1.83e-05	0.000363851
Ifit1bl1	-1.82577	0.470866	1.92e-05	0.000380273
L1cam	-0.697937	2.92544	1.93e-05	0.000380976
Olr1	1.85597	-0.233376	1.93e-05	0.000380976
Clspn	-0.954015	4.28977	1.98e-05	0.000390337
Pira2	-0.501991	6.29767	2.03e-05	0.00039826
Mctp1	-0.556495	6.116	2.07e-05	0.000407315
Gm7160	1.12574	1.05584	2.12e-05	0.000415198
Sardh	0.936991	2.31067	2.2e-05	0.000428324
Il4i1	1.67576	1.04169	2.22e-05	0.000431798
Mapkapk3	0.516952	5.8433	2.34e-05	0.000451648
Fbxl4	-0.592269	3.45888	2.36e-05	0.000455346
Tk1	-0.699859	4.20572	2.38e-05	0.00045961
Dpp7	0.500748	6.09407	2.39e-05	0.00046015
Zbtb5	0.545487	3.5021	2.4e-05	0.000460502
Ska1	-1.33987	1.38505	2.59e-05	0.000493124
Ube2c	-0.882272	4.05131	2.65e-05	0.000503392
Rrm1	-0.605989	6.44942	2.66e-05	0.000506264
Sgo2a	-0.906564	3.75179	2.76e-05	0.000522016
Cxcl16	-0.597618	6.11055	2.79e-05	0.000525565
Tmem132a	0.51736	6.80632	2.85e-05	0.000537003
Il16	-0.799817	3.44433	2.88e-05	0.000539787
Cd5l	-0.577509	11.1099	2.88e-05	0.000539787
Mgst1	0.502414	7.43822	2.91e-05	0.000543649
Tagap	-0.914904	2.19293	2.92e-05	0.000545143
Cep55	-0.920612	3.81467	2.98e-05	0.000554582
Ier5l	0.951866	2.75721	2.99e-05	0.000554582
Lmnb1	-0.813667	4.3549	3e-05	0.000556187
Qdpr	0.554482	6.23012	3.04e-05	0.000562777
Sdf2l1	0.582755	5.95561	3.11e-05	0.000573996
Ly86	-0.514685	5.0471	3.13e-05	0.000577029
Ocstamp	2.13254	0.460972	3.19e-05	0.000586862
Mki67	-0.890562	7.52828	3.25e-05	0.000597869
Kif11	-0.879158	4.99481	3.27e-05	0.000600539
Idi1	0.572839	5.47659	3.33e-05	0.000608657
Marchf10	2.29375	0.131774	3.47e-05	0.000632675
Kynu	1.17326	0.690872	3.58e-05	0.000650209
Filip1l	-0.837885	4.33858	3.66e-05	0.000662408
Traf5	0.583454	3.934	3.72e-05	0.000672683
Tmem176a	-0.823292	2.10336	3.74e-05	0.000674322
Anln	-0.931319	4.99711	3.86e-05	0.000695242
Pgap1	0.500134	7.82601	3.98e-05	0.00071504
Dut	0.748272	3.77612	4.3e-05	0.000766444
Slc24a3	-0.883102	3.03431	4.32e-05	0.000768989
Gm16287	0.779619	2.0675	4.39e-05	0.00078131
Cdc20	-0.850326	3.1319	4.44e-05	0.000787145
Top2a	-0.828439	7.06721	4.46e-05	0.000789859
Il18	-0.641947	2.9332	4.54e-05	0.000802511
Daglb	0.518885	7.95584	4.56e-05	0.000806344
Kif20b	-0.863974	4.56497	4.62e-05	0.000814623
Prr5l	0.765331	2.4844	4.64e-05	0.000817437
Nxpe1-ps	-1.03953	1.37113	4.7e-05	0.000827117
Pmf1	-0.629224	3.39449	4.93e-05	0.000863165
Ogfrl1	-0.552902	4.77204	5.06e-05	0.000880463
Hist2h3c1	-6.77064	-0.225427	5.09e-05	0.000885298
Dhfr	-0.742816	3.81918	5.21e-05	0.000903259
Gm21961	2.36162	0.509561	5.29e-05	0.000916086
Pgm2l1	-0.515801	5.19205	5.47e-05	0.000946035
Mcm7	-0.591327	4.99431	5.51e-05	0.000951721
Carmil1	-0.804498	1.70086	5.53e-05	0.000953778
Gm15448	-0.799045	2.36428	5.77e-05	0.000988653
Ctgf	-0.635345	3.55425	6e-05	0.00102535
Rilpl2	0.555214	6.15412	6.16e-05	0.00105007
Kifc2	-1.06838	0.884526	6.29e-05	0.00106575
Ddias	-0.841926	2.49614	6.29e-05	0.00106575
Gdpd5	-0.586868	3.43763	6.32e-05	0.00107014
Dlgap5	-0.839362	4.14654	6.55e-05	0.00110762
Pole2	-0.680016	2.43419	6.76e-05	0.00114013
Sgo1	-1.00851	2.60921	6.84e-05	0.00115099
Ifi30	0.806054	7.10577	6.86e-05	0.00115099
Rapgef5	-0.755765	4.15901	7.01e-05	0.00117079
Stil	-0.98156	3.1002	7.12e-05	0.00118841
St3gal5	-0.658252	4.33144	7.23e-05	0.00119837
Cdca3	-0.87156	4.25777	7.33e-05	0.0012136
Tox2	-0.928673	3.79781	7.66e-05	0.00125937
Gm20056	0.73252	2.93719	7.76e-05	0.00127234
Letm2	-1.02782	1.26074	8.01e-05	0.00130926
Ccnd3	-0.693206	3.82674	8.26e-05	0.00134643
Calhm6	-0.994659	1.38078	8.53e-05	0.00138733
Zmynd15	-1.05326	1.62249	9.11e-05	0.00147216
E2f7	-0.895331	2.93273	9.21e-05	0.00148332
Fndc7	1.7375	0.118794	9.22e-05	0.00148332
Gpr183	0.606265	3.73035	9.28e-05	0.00149233
Fzd1	0.679908	2.7519	9.39e-05	0.00150741
Nt5dc2	-0.608156	5.08334	9.41e-05	0.00150883
Hjurp	-0.556581	5.51226	9.74e-05	0.00155661
Ifi203	-0.517735	5.57055	9.86e-05	0.00157255
Cd320	0.751352	2.15552	0.00010267	0.00163018
Nlgn2	-0.668567	2.70491	0.000109971	0.00172902
Prim1	-0.752979	3.1229	0.000114264	0.00179432
Gm13135	-5.18169	1.05006	0.000115068	0.00180255
Mis18bp1	-0.784188	4.10701	0.000116374	0.00181858
Pla2g15	0.514304	8.08711	0.000120583	0.00187524
Kif23	-0.671935	5.11323	0.000121204	0.00188261
Gm5086	-0.69212	2.20284	0.000123223	0.00191167
Lox	0.805955	4.40795	0.000124773	0.00193338
Cyr61	-0.666982	2.40143	0.000126431	0.00194967
Pcyox1l	0.698176	2.7114	0.000129511	0.00199239
Hmmr	-0.775813	4.87752	0.000130547	0.00200593
Slc27a6	1.49145	0.0320689	0.000131564	0.00201915
Arhgap28	0.724557	1.98601	0.000136318	0.00207723
Kif4	-0.808094	4.07819	0.000136805	0.00208143
Itga6	-0.507699	7.10398	0.000138487	0.00210033
Tnfrsf23	0.541551	3.74591	0.000138422	0.00210033
Ifitm3	-0.799154	5.09576	0.000145022	0.00218144
Lyzl4	1.14135	1.42885	0.000148344	0.00222
Il1rn	-0.529893	6.22923	0.000149435	0.00222957
Trim36	0.557267	3.69671	0.000149631	0.0022299
Rabgap1l	-0.53887	3.9664	0.000151847	0.0022577
Cdc6	-0.847359	2.81214	0.000154208	0.00228751
Gm31374	-1.43489	3.7351	0.000155462	0.0023008
Gm20605	-0.589076	4.55847	0.000158949	0.002347
Bco2	-1.07547	0.8306	0.000161412	0.00237792
Psd3	-0.582448	6.16844	0.000164908	0.00242386
Tnni2	-1.02851	1.52186	0.000167997	0.00246364
Slc43a3	-0.696191	3.31692	0.000168446	0.0024646
Cenpf	-0.896074	4.59405	0.000168996	0.00246704
Susd1	-0.529926	3.17406	0.000169446	0.0024708
Gm5512	-0.675258	2.40227	0.000170144	0.00247817
Zfp658	-0.881728	1.2587	0.000170481	0.00248027
BE692007	-0.622739	3.84559	0.00017772	0.00257975
Gm49450	-4.77181	4.28372	0.000181846	0.0026337
Brip1	-0.681906	3.67774	0.000185551	0.0026753
Rgs11	-1.39359	0.0423524	0.000185955	0.00267813
Zbtb16	-1.28669	0.792247	0.000187028	0.00268757
Kiz	-0.649332	2.86291	0.000189135	0.00271178
Chd5	1.60231	-0.0616664	0.000191082	0.00273056
Ms4a14	-0.661902	6.66296	0.000191301	0.00273066
Ugt1a6b	6.16328	-0.268031	0.000198039	0.00281745
Tceal8	0.5537	6.32255	0.000201576	0.00286145
Tpbgl	-0.819103	2.12088	0.000210759	0.00298192
Nuf2	-0.877926	4.14173	0.000213035	0.00300129
Adamts5	1.28213	-0.0897397	0.000212877	0.00300129
Klf11	-0.600257	3.26809	0.000214799	0.00301586
Mmp8	0.574811	4.88017	0.000220828	0.00309376
Vsig10l	-0.734738	1.73506	0.00022174	0.00310316
Zfp810	-0.624263	2.84537	0.000222798	0.00311457
Cacna2d4	1.12048	3.80864	0.000223175	0.00311646
Spred3	-0.886715	1.44497	0.000226738	0.00316277
Asf1b	-0.681793	3.86742	0.000229784	0.00319832
Brca1	-0.538135	4.24784	0.000231326	0.00321631
Penk	0.778133	2.35588	0.000231779	0.00321913
Armcx6	-1.21135	1.45257	0.000234015	0.00324668
Irak3	-0.565843	4.27003	0.000242725	0.00334966
Casz1	0.618502	2.634	0.000242741	0.00334966
Gm5615	1.36876	1.44874	0.000244718	0.00336972
Fkbp5	-0.629009	3.18774	0.00024546	0.00337633
Foxm1	-0.825976	4.19606	0.000252398	0.00346796
Prss23	-0.968813	0.189827	0.000257812	0.00352736
Cbx7	-0.715693	2.4582	0.000257783	0.00352736
Dhcr24	0.534744	4.35272	0.000258451	0.00353235
Tarbp2	0.528973	4.15091	0.000265559	0.00362179
Afap1	0.66958	2.82238	0.000266222	0.00362699
Gm43900	1.5958	0.178415	0.000270859	0.00367847
Tpx2	-0.6408	5.41	0.000275021	0.0037232
Spag5	-0.857386	3.78879	0.000276545	0.0037399
Bmyc	-0.681196	1.86458	0.000278288	0.00375952
Galnt9	1.31439	0.901479	0.000282029	0.00380606
Cntrob	-0.596765	2.33822	0.000283184	0.00381764
Kif18b	-0.944667	2.49259	0.000284968	0.00383245
Pif1	-0.958949	1.66981	0.0002951	0.00395342
Mastl	-0.909893	3.72224	0.000296846	0.00397267
Clec10a	0.660922	3.72311	0.000299111	0.00399883
Cyp27a1	-0.531463	4.92221	0.000302056	0.00402981
AI480526	-0.743968	2.17645	0.000306073	0.00407074
Uhrf1	-0.729201	5.08156	0.000311095	0.00412049
Dusp2	0.87564	2.20127	0.000315202	0.0041663
Dennd2c	-0.835959	2.35987	0.000316714	0.00417771
Fignl1	-0.739823	3.78572	0.000321053	0.00422627
Rad51ap1	-0.931669	2.83989	0.000327919	0.00430344
Tmem158	0.816552	2.23174	0.000345746	0.00450521
Etl4	-0.701643	3.25688	0.000346475	0.00450674
Itgal	-0.603162	2.89348	0.000346565	0.00450674
Rrm2	-0.759432	5.2237	0.000348494	0.00452268
Zfp469	-0.990733	0.757249	0.000353327	0.00456458
Kank2	-0.540108	3.14069	0.000357104	0.00460192
2700099C18Rik	-0.966437	1.72965	0.000365015	0.00468997
E2f8	-0.731358	3.97611	0.000365396	0.00468997
Tacc3	-0.552148	4.80308	0.000371794	0.00474369
Rtkn	1.08247	1.2659	0.000371607	0.00474369
Prkaa2	1.09151	1.23454	0.000391193	0.00496786
Asb4	0.557039	3.06202	0.000393805	0.00498497
Gm11879	0.924991	1.44429	0.000395235	0.00499815
Arhgap33	-1.23144	0.30412	0.000400157	0.00505543
Evi2	-0.54752	4.3512	0.000401776	0.0050709
Gen1	-0.79799	3.29152	0.000409499	0.0051532
Troap	-1.04109	1.62035	0.000411811	0.0051736
Ednrb	0.817425	5.58191	0.000412327	0.0051736
Gm4951	0.972998	1.63788	0.000412815	0.00517467
Akap12	-1.04189	0.754014	0.000415011	0.00519714
Fgf13	-0.957383	1.1666	0.000416238	0.00520742
Kif2c	-0.893909	3.58631	0.000418176	0.00522152
Rad18	-0.587538	3.5027	0.000418098	0.00522152
Ccna2	-0.80818	5.45785	0.00042658	0.00531099
Asb18	1.31907	-0.00443614	0.000435863	0.00542131
Plxna4os1	-0.889165	1.35712	0.000442596	0.00549443
Gm14548	-0.581138	5.68491	0.000450251	0.00557869
Cit	-0.885773	3.56035	0.000453782	0.00561113
Nrm	-0.697829	2.94712	0.000456012	0.00562837
Plk1	-0.761021	3.88025	0.000465271	0.00573716
Gm16675	0.948422	0.7565	0.000467289	0.00575241
6030408B16Rik	1.13028	3.71267	0.000480404	0.00589549
Tmod1	-0.593852	3.44149	0.000480932	0.00589635
Smc2	-0.571537	5.94797	0.000506687	0.00617093
Pclaf	-0.78115	4.81935	0.000508652	0.00618244
Trim59	-0.837114	3.74284	0.000515577	0.00624961
Kif22	-0.77903	3.46684	0.000521059	0.00629825
Bank1	-1.03721	2.21315	0.000522228	0.00630278
C1qa	-0.514769	5.80802	0.000522414	0.00630278
Dcstamp	1.12765	2.79559	0.000527042	0.00635266
A530064D06Rik	-0.680142	4.61202	0.000530293	0.00638586
Tnfsf10	-1.30335	-0.0210455	0.000533712	0.00642102
5930403N24Rik	0.843918	1.28329	0.000535259	0.00643361
Hells	-0.696367	3.87396	0.000546926	0.0065526
Frat1	-0.850425	1.23832	0.000552003	0.00658563
Nrg1	1.16497	0.225108	0.00055538	0.00661365
Nek2	-0.862507	3.45131	0.000560261	0.00665944
Cdk1	-0.655961	4.95552	0.000563875	0.00669622
Spc25	-0.636474	4.1445	0.000569987	0.00676255
Shcbp1	-0.822913	3.23688	0.000579207	0.00682785
Ect2	-0.704265	4.19203	0.000583849	0.00686998
Oasl2	-0.569318	5.44914	0.000585363	0.00687521
Pim3	0.718251	2.66651	0.000595457	0.00698102
D430020J02Rik	-0.961147	1.51945	0.000601245	0.00704206
Iigp1	-1.45427	0.865832	0.000614813	0.00718709
Tacr1	1.04923	1.5174	0.000615269	0.00718709
Mx1	-1.04057	2.39989	0.000616998	0.00720074
Hmgb3	-0.759747	3.11225	0.000629727	0.00733598
Il27ra	0.920214	1.46396	0.00063418	0.00738117
Acta2	-0.607218	3.67585	0.000638347	0.00741625
Fxyd5	-0.533236	7.66619	0.000656348	0.00760233
Wwc1	1.75004	-0.351681	0.000669224	0.00772611
Il13ra1	-0.530717	3.99964	0.000687345	0.00791401
Gm13509	5.63664	0.348339	0.000769109	0.00868438
Stk26	-1.05794	0.779172	0.000769956	0.00868632
Stmn1	-0.612877	6.44289	0.000781717	0.00881128
Shc4	-0.799774	1.47156	0.000791173	0.00889447
AI839979	-0.806148	1.85592	0.000799592	0.00896561
Nsl1	-0.573659	2.97083	0.000823635	0.00918714
Treml4	-1.09849	1.09202	0.000832666	0.0092707
Bora	-0.615064	2.55561	0.000843512	0.00934894
Gm49378	-4.30973	0.34595	0.000847477	0.00937986
Cebpb	0.549214	5.12202	0.000848394	0.00938194
H2afv	-0.502531	3.84556	0.000864044	0.00947354
St8sia4	0.554166	6.74298	0.000862976	0.00947354
Platr25	-0.540664	3.11245	0.000864799	0.00947375
Ifit1	-0.929704	2.8721	0.000866608	0.00948354
Dock3	0.788657	2.70795	0.000867168	0.00948354
Gm10767	-1.34406	0.0768203	0.000878627	0.00958441
Usp35	-0.545193	2.59085	0.000879401	0.00958473
Cenpk	-0.807143	2.12776	0.000892163	0.00969903
A230050P20Rik	-0.554572	2.52534	0.000894304	0.00970603
Syce2	-0.597367	2.80368	0.000910979	0.00984547
Cmpk2	-0.765525	3.82515	0.000913658	0.00986613
Mndal	-0.599857	5.56672	0.000923848	0.00995109
Ahrr	0.677317	3.00468	0.000930166	0.0100108
Pick1	-0.836546	2.63957	0.000932914	0.0100319
Adora2b	0.986748	1.46143	0.000934293	0.0100384
Chp2	-1.17775	0.300922	0.000949633	0.0101777
Gabre	1.24828	1.80931	0.000973958	0.0103951
Vmn1r18	-1.38989	0.193551	0.000982131	0.0104649
Gm37917	0.771304	3.0232	0.000983947	0.0104756
Rtp4	-0.639818	4.09902	0.000988278	0.010513
Dbf4	-0.563739	4.38212	0.000992956	0.0105541
Ticrr	-0.714349	2.58931	0.00100826	0.0106726
Ncapd2	-0.627095	5.12999	0.00101131	0.0106883
Gtse1	-0.644709	3.20891	0.00103767	0.0108943
Cmah	-0.784177	3.02012	0.00105165	0.0110051
Slc16a9	-0.626874	2.75691	0.001058	0.0110536
Spic	-0.687375	2.96325	0.00105942	0.0110594
Gabbr1	-0.961855	0.757099	0.00106286	0.0110864
Ifi203-ps	-1.06641	1.38656	0.00106793	0.0111302
Pla2g16	0.641352	1.89771	0.00108921	0.0113153
Rad51	-0.718883	3.67874	0.00110169	0.0114077
Ccl2	1.05231	4.79154	0.00110254	0.0114077
Galnt15	1.44848	-0.0450926	0.00110429	0.0114166
Aunip	-1.03885	1.02414	0.00110783	0.011444
Zwilch	-0.582779	3.8788	0.00113004	0.0116454
Camsap3	-1.31957	0.0936973	0.00114056	0.0117256
Map7d3	-1.27162	0.363521	0.00115394	0.0118442
Chaf1b	-0.54501	3.73699	0.00115822	0.0118692
Mcm5	-0.552673	5.41767	0.0011686	0.011966
2900026A02Rik	-0.800392	2.73055	0.00117021	0.0119698
Hebp2	1.22693	0.359537	0.00117176	0.0119698
Spry3	-1.10446	0.586847	0.00117666	0.0120009
Gm37985	-1.26479	0.465478	0.00118758	0.012093
Cenpn	-0.71473	2.62063	0.0012086	0.0122681
Tonsl	-0.734978	2.265	0.00121858	0.01235
Map7	0.526693	2.29608	0.00122705	0.0124065
Cuedc1	-0.738264	1.96191	0.00123972	0.012515
mt-Rnr2	-0.875765	10.4204	0.00126403	0.0127204
Camk2a	0.747122	1.67275	0.00127294	0.0127801
Itga1	0.935021	0.985999	0.00127643	0.0127952
Gm45234	-0.750086	4.56406	0.00127822	0.0128031
Jag1	-0.598824	3.63536	0.00128512	0.0128622
Gm17571	-2.92376	1.22191	0.00128771	0.0128781
Sys1	0.508546	3.67502	0.001323	0.0132105
Spdl1	-0.566128	4.69194	0.00134541	0.0133927
Ccne2	-0.874274	4.0899	0.00135974	0.013504
Ezh2	-0.578333	4.29113	0.00137053	0.0135874
Mdm1	-0.637892	2.02418	0.00138576	0.013709
Trex1	-0.508614	3.23116	0.00138785	0.013709
Gnat3	0.792475	1.40917	0.0013988	0.0137749
Pcgf2	-0.700228	2.01854	0.00140861	0.0138489
Serpina3g	0.927857	0.237508	0.00141379	0.01388
P2ry13	-0.772923	1.62595	0.00141904	0.0139209
Gm48054	-1.38106	1.92976	0.0014379	0.0140737
Xkr5	-1.43944	-0.0131163	0.00148891	0.0145083
Plcxd2	0.523975	2.51926	0.00149209	0.0145246
Plekhh2	-0.822203	2.1245	0.00150944	0.0146526
Ccnb1	-0.668321	4.58695	0.00152418	0.0147609
Mybl2	-0.800089	2.71193	0.00152991	0.014788
Bard1	-0.730058	2.70602	0.00152977	0.014788
Orc1	-0.887102	1.53846	0.00154275	0.0148847
Pnisr	-0.525988	6.41507	0.0015478	0.0149222
Cdkn2c	-0.592591	4.25608	0.00155684	0.0149981
Hsd17b7	0.534363	3.63433	0.00156303	0.015024
Dusp8	-0.854627	1.16129	0.00156976	0.0150661
Gmppb	0.501339	3.61128	0.00160969	0.0153577
Melk	-0.755299	3.28662	0.00161122	0.0153609
Dsn1	-0.594718	2.67095	0.00161287	0.0153652
Rab27a	-0.672258	2.09517	0.00162405	0.0154603
Slc2a3	-0.565948	2.35676	0.00162843	0.0154906
Dynlt1a	-0.703612	1.98107	0.00169879	0.0160177
Syne2	-0.628474	3.08158	0.00169844	0.0160177
Ccdc88a	0.515959	6.96807	0.00170975	0.0160974
Pbk	-0.743753	3.57256	0.00173011	0.0162297
Pacrg	0.544744	2.56741	0.00173192	0.0162349
Nudt14	-0.994891	3.67918	0.00177161	0.0165346
Kntc1	-0.696789	4.35436	0.00180242	0.0167735
Cd74	1.00651	7.24472	0.00183949	0.0170445
Bgn	-0.555437	3.87792	0.00184778	0.0170966
Gm9864	0.727512	2.79903	0.00187512	0.0173122
Pdgfrb	-0.875765	0.807059	0.0018769	0.0173162
Cxcl2	-1.45503	0.165533	0.00188156	0.0173468
Bub1	-0.765311	4.20462	0.00190163	0.0175067
Stat4	-1.51062	0.510695	0.00191047	0.0175629
Kif14	-0.814493	3.00152	0.00192075	0.0176448
Mcm10	-0.673542	3.58792	0.00193949	0.0177789
Enpp2	0.749214	0.811514	0.00193921	0.0177789
Mir99ahg	0.662328	2.55954	0.001956	0.0178792
Pex16	0.543325	2.99875	0.00195747	0.01788
Tns4	-0.823507	0.708256	0.00198533	0.0181216
Gprc5c	0.6103	4.469	0.00201501	0.0183794
9430025C20Rik	-0.856525	0.461713	0.00210945	0.0191189
Tgfbr3	0.570623	2.12146	0.00214429	0.0193664
Chek1	-0.781585	2.28394	0.0021981	0.0197691
Atl1	-0.621813	1.68866	0.00222048	0.0199564
Cip2a	-0.570647	4.32613	0.00225178	0.0201953
Spaca6	-1.02815	0.445008	0.00225372	0.0201987
4930523C07Rik	-0.811469	1.03854	0.00226492	0.0202565
Cdc25b	-0.572762	4.15647	0.00228101	0.020344
Prom1	0.736962	1.80633	0.00231509	0.0205482
Ms4a4c	-1.166	0.484731	0.00235547	0.020849
Gm28035	-2.59103	0.328624	0.00239662	0.021155
Zcwpw1	-0.794389	1.43072	0.00240406	0.0212062
Cks2	-0.57265	2.70662	0.00249976	0.0219001
Chn2	-0.535101	3.25065	0.00251012	0.021976
Ldlrad4	0.592133	2.09967	0.0025911	0.0225392
Atp1b3	0.501469	9.0828	0.00259664	0.0225644
Krt80	-0.953252	0.697182	0.00261904	0.022713
Rnase6	0.940066	1.26704	0.00262582	0.0227412
Zfp229	-0.66641	1.72108	0.00263452	0.0227738
Dtl	-0.663363	3.52961	0.00263847	0.0227894
Coro1a	-0.530969	6.44435	0.00266779	0.0229963
Slc9a5	-0.86804	0.967677	0.00267457	0.0230393
Col4a2	-0.558759	2.37094	0.0026842	0.0230759
Ccl8	1.01821	2.23883	0.00268253	0.0230759
Ryr1	1.34516	0.180836	0.00272343	0.0233507
Cacnb1	-0.979745	0.701255	0.00272652	0.0233616
Esco2	-0.881619	2.78529	0.00275398	0.0235498
Gm45449	-0.720614	1.42125	0.00275179	0.0235498
Atad5	-0.517043	3.46733	0.00277764	0.0237049
Ttk	-0.710687	2.87041	0.00277958	0.0237057
Zdhhc2	-1.01349	1.44431	0.00282677	0.0240603
Hspb6	-0.817077	1.47761	0.00283442	0.0241094
Ccnf	-0.537929	4.03771	0.00285264	0.0242484
Ighm	-1.07156	3.96663	0.00287865	0.0243708
Map3k15	-0.550237	2.45281	0.00288031	0.0243708
Cntln	-0.546742	3.32373	0.00301885	0.0253761
Amot	-0.654134	1.45688	0.00304269	0.0255431
Zfp580	-0.991457	0.718531	0.00306335	0.0256998
Cib2	0.81664	2.0585	0.00308431	0.0258587
Itpr3	-0.503348	4.41982	0.00309718	0.0259181
Rpl37rt	0.599796	3.91507	0.00309482	0.0259181
Pecam1	0.680186	1.86432	0.00316897	0.0263623
Tspan7	0.84107	1.77622	0.00316895	0.0263623
Lockd	-1.01863	1.04065	0.00319624	0.026572
Gm19918	2.24154	0.328109	0.00323503	0.0267906
Malat1	-0.643725	9.9845	0.00323756	0.0267943
Maff	0.71285	1.39663	0.00325412	0.0268967
Jsrp1	1.09946	0.33912	0.00326968	0.0270079
Pimreg	-0.752096	3.15076	0.00332298	0.0273603
Pcdhgb6	-1.07359	0.58019	0.00333414	0.027418
Cst7	0.997483	1.34317	0.00333424	0.027418
Gm17383	-2.58347	0.528446	0.00338711	0.0277286
Lrr1	-0.934924	1.17092	0.00340752	0.0278602
Marco	-1.01221	1.03154	0.00342193	0.0279425
Acrbp	-0.651855	1.54033	0.00345881	0.0282236
Igfbp7	-0.532409	1.72368	0.00346431	0.0282348
Prag1	-0.583539	2.01049	0.00355107	0.0288687
Tmem171	-0.577182	2.90876	0.00356939	0.0289628
Gm10038	-3.57791	1.11305	0.00359034	0.0291144
Lrig1	-0.818157	0.969461	0.00361062	0.0291501
Htr1b	0.974142	1.31377	0.00360266	0.0291501
Tubb2b	-0.695217	1.87517	0.00362317	0.0292148
Ccne1	-0.599147	3.04703	0.0037017	0.0297176
Dclk2	-1.07621	0.244008	0.00374903	0.0300226
Rbm38	-0.655189	1.80731	0.00378588	0.0302612
Cep72	-0.590371	1.86916	0.00381687	0.030471
Gm10031	3.58311	1.82829	0.00382568	0.0305224
Rad54b	-0.784036	2.28648	0.00384237	0.0306176
Gm20412	0.682779	3.13354	0.00385141	0.0306705
Gm15387	-3.62393	1.09184	0.00386109	0.0307287
Phf19	-0.751106	2.67539	0.00393259	0.0312204
Ciita	1.06593	1.85768	0.00394242	0.0312791
Cd300ld4	-1.22623	2.44958	0.00395196	0.0313355
Spata5l1	0.861309	1.16075	0.00396756	0.0314204
Nlrp1c-ps	-0.613177	2.59115	0.00397398	0.0314519
Ccdc15	-0.941191	0.594638	0.00399353	0.0315872
Ttc32	-0.513449	2.18109	0.00402567	0.0317438
Mgll	0.555647	7.56502	0.00402944	0.0317541
Slc25a23	-0.726909	1.61249	0.00405293	0.0318806
Ccr1l1	-1.06611	0.151976	0.00405746	0.0318967
Pou3f1	0.928423	2.24134	0.00409161	0.0321318
Plcb4	-0.913591	0.477674	0.00420554	0.03284
Lpar2	-0.940033	0.321848	0.00427273	0.033304
Diaph3	-0.537854	4.69197	0.00431534	0.0335548
Fanci	-0.67774	2.79791	0.00432378	0.0336001
Ankrd13d	-0.534605	2.2364	0.00433977	0.033704
Mapk11	-0.914828	0.866679	0.00435418	0.0337548
C030034L19Rik	-0.721682	1.3901	0.00442489	0.0342204
Gm6166	-3.40662	4.34821	0.00446116	0.0344387
Rad51b	-1.00044	0.487152	0.00447301	0.0344888
Oas3	-0.647232	4.16287	0.00447847	0.0345102
Kifc1	-0.709169	3.58452	0.00451021	0.034651
Efcab11	-0.89008	1.37729	0.00453779	0.0347798
Gm11373	-0.912638	0.823657	0.00454686	0.0348286
Gm10704	-3.42951	2.05213	0.00458945	0.035113
Wdr66	-0.910899	0.524913	0.00460932	0.0351853
Plk4	-0.581479	3.8091	0.00460499	0.0351853
C130013H08Rik	0.66193	1.62369	0.00471208	0.0357535
Gm12589	1.05242	0.0394916	0.00477264	0.0361041
Msrb2	-0.564491	2.04864	0.00480473	0.0362851
Irf7	-0.651738	2.99697	0.00485387	0.036549
Nrap	-0.857497	0.426318	0.00487768	0.0366853
Fancd2	-0.714306	2.89687	0.00492166	0.0369494
Ercc6l	-0.609955	3.61532	0.00494668	0.037031
Fam110c	0.626708	2.72335	0.00500653	0.037392
Ptpn3	0.691628	1.27988	0.00505321	0.0376921
Nxn	0.698992	1.80536	0.00512291	0.0381283
Gm28424	1.12328	-0.104709	0.00512139	0.0381283
Ptprv	-1.01562	0.452442	0.00522663	0.0388778
Pla2g2e	0.802731	1.01897	0.00523318	0.038904
Vash2	-0.502446	2.11595	0.00528423	0.0391477
Gm43940	1.22018	0.000971071	0.00532563	0.0393641
Lgi4	1.05529	0.41238	0.00533056	0.0393776
Phtf1os	0.954114	0.734871	0.00537919	0.0396467
Tgtp2	-1.30104	1.48599	0.00539845	0.0397421
Pgm5	0.616818	2.01429	0.00545724	0.040129
Zfp956	-0.634632	1.63359	0.00550602	0.0404642
Gm42785	-0.754083	2.22415	0.00551929	0.0405157
Tst	0.579079	1.9538	0.00553498	0.0405846
Nptxr	-0.657894	2.22054	0.00556599	0.0407655
Ddx11	-0.506575	2.98367	0.00566616	0.0414048
Gm16712	-0.924155	0.418373	0.00573167	0.0417649
Il1r1	0.85809	0.477842	0.0057373	0.0417711
Ptprf	0.795233	0.303013	0.00579274	0.0420669
9130019O22Rik	-0.534777	2.13821	0.00582328	0.0422172
Oip5	-0.687042	2.02445	0.00583364	0.0422446
Kif18a	-0.738477	1.99124	0.00585753	0.0423699
Nhsl2	-0.570493	2.44693	0.00585724	0.0423699
Gm14300	1.07257	1.17311	0.00586873	0.0424032
Efnb2	-0.796513	0.197254	0.0058774	0.042442
Tyms	-0.527184	3.19888	0.00588911	0.0425027
Gm14584	-0.808387	2.40676	0.00598345	0.0430386
Hdgfl3	-0.659838	2.95943	0.00598858	0.0430515
Myom1	-0.68147	1.40553	0.00603338	0.043301
Cdca8	-0.573283	4.04803	0.00605139	0.0433818
Fbxo5	-0.688368	3.08065	0.0062626	0.0446718
Lama3	-0.673151	2.09291	0.0063307	0.0450576
mt-Nd6	-0.712914	10.5579	0.00638149	0.0453689
Osgin1	0.564265	3.19039	0.00640612	0.0454937
Anks6	-0.506132	2.02027	0.00658762	0.0466026
Tagln	-0.560644	2.73453	0.00682961	0.0480238
Cacna1b	0.648734	2.07005	0.00688374	0.0483252
mt-Th	1.50752	-0.11121	0.00691434	0.0484871
P2ry12	-0.918769	0.949187	0.00695146	0.0486943
Traip	-0.705653	1.5866	0.00704548	0.0492724
Alkbh7	0.713893	1.89061	0.00717259	0.049917
Adamts2	-0.772917	0.429547	0.00724752	0.0503295
Rpgrip1	-0.511878	1.85283	0.00727929	0.0504957
Ptprn	0.52387	2.08303	0.00735817	0.0509604
Bcl7a	-0.52299	2.26414	0.00743189	0.0513029
Cdh2	-0.688753	0.97824	0.0075495	0.051922
Pdk4	-0.778121	0.749849	0.00757943	0.0520721
Teddm2	-1.162	1.9753	0.00765369	0.0524907
Klhl23	-0.771512	1.31195	0.00787369	0.0536299
4932422M17Rik	-0.537821	2.20935	0.00798049	0.0542766
Aurka	-0.534424	3.45354	0.00800349	0.054299
1700101I11Rik	1.01573	0.34919	0.00800911	0.054299
Cenpi	-0.61741	3.41646	0.00806504	0.0546494
mt-Rnr1	-0.970533	8.93936	0.00810086	0.0547478

## Sheet: Suppl Table 3
Supplementary Table 2. MK2 KO M0 macrophages vs MK2 KO M2 macrophages
	logFC	logCPM	PValue	FDR
Mgl2	6.06427	4.07907	3.62e-166	4.65e-162
Il1rl2	2.93356	3.53289	6.93e-96	4.45e-92
Slc7a2	4.32387	5.75735	4.71e-79	2.02e-75
Retnla	10.047	5.10249	3.91e-71	1.26e-67
Mcf2l	2.96988	4.40442	1.62e-68	4.17e-65
Arg1	6.30077	2.3361	7.92e-62	1.7e-58
Ptgs1	2.6342	4.88987	3.58e-60	6.58e-57
Tmem26	5.32108	5.8729	4.45e-56	7.15e-53
Wdfy2	1.34844	8.10095	1.11e-55	1.59e-52
Kcnd3	9.44852	2.27808	1.91e-52	2.46e-49
Bhlhe40	2.08477	6.77824	3.77e-52	4.4e-49
Dhrs9	1.48859	6.48075	8.77e-52	9.4e-49
Bcar3	1.41895	6.02421	1.65e-51	1.64e-48
Flrt2	1.85233	7.39419	1.8e-51	1.65e-48
Lrrc32	2.79402	2.83332	2.57e-50	2.2e-47
Il6st	1.33549	9.12077	7.22e-49	5.8e-46
Gpc1	2.76869	5.39138	1.59e-47	1.2e-44
Ak2	1.41527	6.1304	2.69e-46	1.92e-43
Inpp5a	1.5554	4.72155	2.95e-46	2e-43
Rnf19b	1.84228	6.58037	8.65e-46	5.56e-43
Gm5345	4.71612	1.35372	2.9e-44	1.78e-41
Pou2f2	-2.18252	4.69495	5.06e-44	2.96e-41
Lipn	3.13981	3.91701	4.18e-43	2.34e-40
Jak2	1.6973	6.39809	3e-42	1.61e-39
Abcd2	1.56444	5.59001	5.62e-42	2.89e-39
Nek6	1.06601	6.37065	9.59e-41	4.74e-38
Flt1	4.00178	1.8095	1.03e-40	4.92e-38
Ralgds	2.05116	6.29601	2.25e-40	1.03e-37
Gatm	1.33361	6.91665	4.14e-38	1.84e-35
Ksr2	2.15441	4.41879	5.41e-38	2.32e-35
Plekhg1	2.09022	4.29346	2.39e-37	9.94e-35
Csf2rb	1.56659	8.94741	4.54e-37	1.83e-34
Angptl2	1.90516	7.38792	5.3e-37	2.07e-34
Nfil3	2.38871	3.68543	1.13e-36	4.27e-34
Myrf	2.20827	4.36841	2.18e-36	8.02e-34
Cd14	-2.13387	5.658	5.37e-36	1.92e-33
Fchsd2	1.44605	6.89383	6.95e-36	2.42e-33
Serpinb9b	1.85745	2.98908	2.8e-35	9.49e-33
Tnfrsf26	1.49647	4.74545	3.22e-35	1.06e-32
Clcn5	1.05486	6.7031	3.78e-35	1.22e-32
Dusp4	1.72559	5.46926	1.05e-34	3.29e-32
Fam20c	1.37519	8.864	1.35e-34	4.12e-32
Zcchc2	1.22617	6.33886	6.23e-34	1.86e-31
Gm8113	3.48489	2.59059	6.67e-34	1.95e-31
Smap2	1.801	7.7718	1.53e-33	4.38e-31
Scn3a	7.864	2.01563	3.58e-33	1e-30
Ptpre	1.12143	7.35479	3.97e-33	1.09e-30
Fcgr2b	2.41435	8.4764	6.57e-33	1.76e-30
F7	1.94325	5.79488	7.45e-33	1.95e-30
Cd274	1.4245	7.85845	8.42e-33	2.17e-30
Clec12a	-1.17836	8.26778	1.01e-32	2.55e-30
Rgl1	1.03261	7.43298	1.93e-32	4.77e-30
F10	2.5055	5.46361	2.68e-32	6.51e-30
Itgb3	1.77661	7.33311	3.47e-32	8.27e-30
Pdcd1lg2	6.27993	2.31254	4.27e-31	9.97e-29
Fam129a	-1.08827	5.39683	8.07e-31	1.85e-28
Awat1	3.33	1.92446	8.97e-31	2.02e-28
Pdia4	1.48493	7.31943	1.02e-30	2.26e-28
Chil3	4.05827	7.43136	1.19e-30	2.6e-28
Ddhd1	1.88886	6.6453	1.28e-30	2.75e-28
Cldn11	6.24367	1.30129	1.66e-30	3.5e-28
Vwf	1.26691	6.94403	1.72e-30	3.57e-28
Rrp8	1.19915	4.86911	1.8e-30	3.67e-28
Anxa4	0.878271	9.59828	7.1e-30	1.43e-27
Cln5	0.985279	6.8786	2.6e-29	5.14e-27
Fn1	2.89217	7.21052	7.3e-29	1.42e-26
Man1a	1.22001	7.83479	7.77e-29	1.49e-26
Smg5	1.02464	5.21035	1.08e-28	2.04e-26
Tlr2	-1.83867	4.15825	1.51e-28	2.82e-26
Sh3pxd2a	-1.02219	5.03185	1.95e-28	3.58e-26
Ms4a4a	2.09314	6.72868	2.9e-28	5.26e-26
Bex1	2.97654	5.18846	3.47e-28	6.19e-26
Fam198b	1.04116	7.47283	3.9e-28	6.88e-26
Mmp19	1.36869	6.66769	7.96e-28	1.38e-25
Klf9	1.42105	4.51033	8.54e-28	1.46e-25
Agpat3	1.00494	6.72631	9.55e-28	1.62e-25
Dnmt3a	0.874968	8.83849	1.2e-27	2e-25
F630028O10Rik	-1.86094	4.45368	1.78e-27	2.93e-25
Itgax	2.32235	7.92756	2.78e-27	4.52e-25
Cblb	1.16322	7.95374	8.55e-27	1.38e-24
Il31ra	5.43316	0.624876	1.02e-26	1.62e-24
Slamf8	1.65577	5.24855	1.26e-26	1.98e-24
Map2	3.6271	1.8553	2.59e-26	4.02e-24
Egr2	1.68781	6.26503	3.12e-26	4.78e-24
Fosl2	1.0297	5.42096	4.04e-26	6.11e-24
Znrf2	0.850792	7.26607	4.28e-26	6.4e-24
Anxa1	0.839943	10.8243	1.01e-25	1.49e-23
Pdgfa	1.07183	4.41598	1.05e-25	1.54e-23
Plekha3	0.929446	5.84186	1.99e-25	2.87e-23
Tent5c	1.10724	5.01585	5.15e-25	7.35e-23
Clic4	0.793711	9.84722	2.41e-24	3.4e-22
Rab19	1.56735	2.98285	4.39e-24	6.13e-22
Cd300lb	0.774437	8.34568	5.18e-24	7.17e-22
Cd9	0.880976	8.79026	8.1e-24	1.11e-21
Nlrp3	-1.45354	3.65363	1.01e-23	1.37e-21
Ceacam19	3.09025	1.83037	1.93e-23	2.59e-21
Atp6v0a1	0.814615	9.91095	2.1e-23	2.78e-21
Nabp1	1.34752	7.37913	2.27e-23	2.98e-21
Sgk1	1.5804	6.44323	2.89e-23	3.75e-21
Rab3il1	0.979457	7.35099	3.28e-23	4.22e-21
Pkdcc	2.01669	3.95298	4.18e-23	5.32e-21
Fgd3	-0.78764	5.41245	4.46e-23	5.62e-21
Ampd3	-0.93918	5.55441	1.02e-22	1.28e-20
Zcchc24	-0.735563	5.355	1.64e-22	2.02e-20
Csf2rb2	0.97188	9.01771	1.74e-22	2.13e-20
Ptger2	1.60709	3.83192	1.84e-22	2.23e-20
Fgl2	1.69276	5.22207	2.41e-22	2.89e-20
Irf4	2.62716	1.71458	2.87e-22	3.42e-20
Rnase2a	7.5133	0.164065	6.04e-22	7.13e-20
Fgd6	0.95725	6.39513	1.18e-21	1.38e-19
Tmem268	1.03355	5.33655	1.3e-21	1.51e-19
Elk3	-0.832873	4.98148	1.45e-21	1.65e-19
Focad	1.10255	4.36207	1.44e-21	1.65e-19
Limd2	-1.07264	5.21648	1.52e-21	1.72e-19
Stt3b	0.889181	7.84016	1.67e-21	1.87e-19
Ahr	2.02841	2.80439	2e-21	2.22e-19
Sestd1	0.76041	6.73778	2.12e-21	2.33e-19
Gnb4	1.16359	4.40797	3.94e-21	4.3e-19
Arap3	-1.72908	3.0921	4.33e-21	4.68e-19
Clec7a	1.45334	10.0509	5.22e-21	5.6e-19
Cish	4.31361	1.28107	5.28e-21	5.61e-19
Jcad	1.41908	3.93815	8.28e-21	8.72e-19
Tanc2	1.13093	6.6343	9.69e-21	1.01e-18
Xylt2	-0.979767	6.26557	1.89e-20	1.96e-18
Gng11	1.08021	4.08101	2.21e-20	2.28e-18
Ap2m1	0.954094	9.58124	2.31e-20	2.35e-18
Olfm1	1.39243	2.93122	2.79e-20	2.82e-18
Rnf150	-0.790473	6.9697	4.22e-20	4.24e-18
Tifab	1.11878	5.57662	4.29e-20	4.28e-18
Tmem202	1.22541	3.31271	5.08e-20	5.03e-18
Slc30a4	1.08114	5.029	5.21e-20	5.12e-18
Irf1	1.26042	5.95844	6.04e-20	5.89e-18
5830432E09Rik	1.26351	3.07481	7.65e-20	7.39e-18
Klhl6	-1.09024	3.91475	8.22e-20	7.89e-18
Ccr1	0.884796	7.07629	8.38e-20	7.99e-18
Ric1	0.795995	6.02544	9.53e-20	9.01e-18
Plekhf1	2.51633	1.83338	1.72e-19	1.61e-17
Retreg1	-1.03808	5.39821	3.21e-19	2.99e-17
Pkp2	2.18732	3.12012	3.58e-19	3.31e-17
Aff1	0.713644	7.61949	4.1e-19	3.76e-17
B3gnt7	1.43425	2.89491	5.51e-19	5.03e-17
Ldlrad3	1.13374	4.5741	5.71e-19	5.17e-17
Fos	-0.913635	5.51743	6.15e-19	5.53e-17
Ints6l	-1.04052	5.65095	6.56e-19	5.86e-17
Slc36a2	6.17479	1.76815	7.77e-19	6.89e-17
Dusp1	-0.883473	5.39126	9.16e-19	8.07e-17
S1pr1	-1.01632	5.85014	1.08e-18	9.45e-17
Aldh1b1	1.22567	4.13324	1.35e-18	1.17e-16
Pparg	0.784338	6.75421	1.81e-18	1.56e-16
Ier3	2.332	3.87968	1.86e-18	1.6e-16
Ptger4	-1.22646	2.63119	2.02e-18	1.72e-16
Ptgir	1.48104	3.3543	2.06e-18	1.74e-16
Tspan5	0.974859	4.80008	2.17e-18	1.82e-16
Slc40a1	-0.956911	9.0802	3.23e-18	2.69e-16
Pi4ka	0.652006	7.21354	3.88e-18	3.22e-16
Tmem144	0.923822	4.53738	3.98e-18	3.28e-16
Arrb2	-0.837558	7.03233	4.26e-18	3.49e-16
Nfatc2	-0.988025	4.97704	6.89e-18	5.61e-16
Bcap31	0.674493	7.92205	8.59e-18	6.95e-16
Gadd45b	0.826519	6.10588	1.04e-17	8.35e-16
Fnbp1	-0.735057	7.32743	1.36e-17	1.08e-15
Klf4	1.72364	2.5547	1.38e-17	1.1e-15
Traf5	1.20146	3.934	1.51e-17	1.19e-15
Ptpn22	-0.973501	4.75094	1.72e-17	1.35e-15
Stk17b	-0.930807	5.93934	1.75e-17	1.36e-15
Alas1	0.824598	7.40816	1.79e-17	1.39e-15
Baiap2	0.893124	6.01268	2.21e-17	1.7e-15
Slc16a10	-0.695863	6.83104	2.43e-17	1.86e-15
P2ry14	0.968572	4.89649	3.36e-17	2.56e-15
Pcid2	0.753773	4.91968	3.84e-17	2.91e-15
Ifit3	-2.00025	3.52301	3.92e-17	2.95e-15
Itga9	-1.15553	3.53582	3.95e-17	2.95e-15
Camk1d	-0.734856	5.08772	4.31e-17	3.2e-15
Ccl9	0.842019	9.10515	5.15e-17	3.81e-15
Ctsl	1.06795	12.1616	5.84e-17	4.29e-15
Pid1	-0.925598	7.22952	6.26e-17	4.57e-15
Phospho1	1.80815	4.98787	6.77e-17	4.92e-15
Pcyt1a	0.683396	8.15673	6.94e-17	5.02e-15
Clstn1	0.786236	5.63642	8.36e-17	6.01e-15
Marcksl1	-1.81549	2.40537	8.61e-17	6.15e-15
Clec4a3	1.07591	6.89562	9.06e-17	6.44e-15
Sntb2	-0.76918	5.47796	9.71e-17	6.86e-15
Stxbp3	0.945093	6.76954	1.05e-16	7.38e-15
Tfrc	1.09717	11.4052	1.07e-16	7.47e-15
Fnbp1l	-1.06712	4.95798	1.42e-16	9.9e-15
Dcbld2	0.866131	4.78723	1.47e-16	1.02e-14
Zyx	0.809911	6.71762	1.62e-16	1.11e-14
Prkcd	0.793823	8.37878	1.66e-16	1.13e-14
Slc7a11	1.20749	4.92491	1.66e-16	1.13e-14
Arhgap6	1.11051	5.5293	2.22e-16	1.5e-14
Ncapg2	-1.05505	5.72586	2.8e-16	1.89e-14
Cd44	0.694766	9.59052	3.13e-16	2.1e-14
Fyn	0.882098	5.77637	3.58e-16	2.39e-14
Rras2	1.44284	3.63709	4.07e-16	2.7e-14
Sash1	-0.616918	8.24698	4.41e-16	2.91e-14
Gramd3	0.653092	5.22889	5.44e-16	3.57e-14
Nfkbia	-0.929692	4.21434	7.06e-16	4.61e-14
Gda	1.1424	4.93	1.1e-15	7.12e-14
Atf3	0.667987	9.09817	1.37e-15	8.86e-14
Slc2a1	0.740059	4.94248	1.51e-15	9.72e-14
Adra1a	-0.929381	5.60008	1.58e-15	1.01e-13
Htr2a	1.72249	2.67493	1.76e-15	1.12e-13
Slc15a3	0.782863	8.88906	1.79e-15	1.14e-13
Sema4d	-0.736706	8.00176	1.96e-15	1.23e-13
Fgd2	-1.23924	3.67598	2.19e-15	1.37e-13
Fam129b	0.894396	9.6506	2.65e-15	1.65e-13
Mllt3	0.932826	3.77298	3.24e-15	2.02e-13
Ear2	3.18968	3.30921	3.32e-15	2.05e-13
Ms4a6b	-0.89532	5.20574	3.35e-15	2.06e-13
Hbegf	1.24906	2.68047	3.87e-15	2.37e-13
Rhobtb1	-1.18399	3.29455	3.93e-15	2.39e-13
Fmnl1	-1.07544	5.82785	3.93e-15	2.39e-13
Tfec	0.7164	5.18348	4.04e-15	2.44e-13
Dlg3	0.902696	4.41409	4.91e-15	2.95e-13
Tarm1	3.44892	0.5373	5.46e-15	3.27e-13
Cd151	0.816813	6.22502	7.76e-15	4.62e-13
Wwp1	-0.879882	8.74733	8.1e-15	4.78e-13
Dse	0.562528	7.46958	8.08e-15	4.78e-13
Smad3	-0.948557	3.63965	8.37e-15	4.92e-13
Ahcyl2	0.629914	6.94366	9.46e-15	5.53e-13
Arl15	0.971542	3.66343	9.52e-15	5.54e-13
Atp1a3	0.776439	7.96887	1.04e-14	6.04e-13
Malt1	0.88257	5.7145	1.08e-14	6.22e-13
Aif1	-0.97687	4.92551	1.35e-14	7.73e-13
Fcgr1	-0.793524	6.54593	1.45e-14	8.3e-13
Plek	0.822367	10.7226	1.56e-14	8.86e-13
Galnt6	0.617364	7.07473	1.88e-14	1.07e-12
Atp6v0d2	1.0182	10.7964	1.91e-14	1.08e-12
Matk	1.28566	4.75638	1.94e-14	1.09e-12
Oxct1	0.597492	8.00249	2.05e-14	1.14e-12
Rars	0.749492	6.73259	2.04e-14	1.14e-12
Hck	-0.647524	5.59318	2.7e-14	1.5e-12
Clec4n	-1.5742	4.7623	2.82e-14	1.55e-12
Psmb10	1.27563	5.30115	2.81e-14	1.55e-12
Tmem132a	0.94432	6.80632	3.03e-14	1.66e-12
Tmem176b	-1.47768	2.96494	3.18e-14	1.73e-12
Plekhg3	-0.703767	4.9134	4.37e-14	2.37e-12
C5ar1	-0.626106	8.72574	4.85e-14	2.62e-12
Scd2	1.01938	7.01697	4.99e-14	2.69e-12
B830042I05Rik	2.12934	5.26092	5.12e-14	2.74e-12
P2ry1	1.07903	3.75415	5.4e-14	2.88e-12
Pim1	0.606727	5.98852	7.34e-14	3.9e-12
Nfkbiz	-2.19969	1.52447	1.01e-13	5.37e-12
Maf	-0.89514	8.42206	1.22e-13	6.41e-12
Fig4	0.601853	6.2663	1.24e-13	6.52e-12
Dennd1c	-0.892608	4.29077	1.44e-13	7.54e-12
Pcp4l1	-1.70815	5.48386	1.75e-13	9.11e-12
Dgkd	-0.689262	6.80173	2.13e-13	1.11e-11
Rpn1	0.586165	7.5927	2.18e-13	1.13e-11
Fcrl1	-1.74297	1.56891	2.43e-13	1.25e-11
Ssh2	-0.940535	4.02137	2.46e-13	1.26e-11
Pla2g5	2.69771	1.05076	2.61e-13	1.33e-11
Snn	1.07643	3.7736	2.87e-13	1.46e-11
Cited2	-0.616822	5.78856	2.93e-13	1.49e-11
Ankle1	-1.75443	1.54058	3.3e-13	1.66e-11
Rps6ka5	-1.11606	2.79955	3.58e-13	1.8e-11
Rasgef1b	-0.666281	7.0021	3.6e-13	1.8e-11
Tlr9	-1.14148	3.1923	3.66e-13	1.82e-11
Eif5a	0.622425	8.61226	3.99e-13	1.98e-11
Gm13431	1.94134	1.32592	4.24e-13	2.1e-11
Atp8b4	-1.00482	6.54238	4.69e-13	2.3e-11
Map3k5	-0.94956	3.41854	4.69e-13	2.3e-11
Dhcr7	0.842031	4.85727	4.79e-13	2.34e-11
Cep85	-0.920799	5.6832	4.95e-13	2.41e-11
Itga6	-0.968995	7.10398	5.05e-13	2.45e-11
Hvcn1	0.798826	7.69531	5.16e-13	2.49e-11
Pdp1	0.613036	6.62916	5.49e-13	2.65e-11
Slc25a37	-0.7972	5.09818	6.11e-13	2.93e-11
Itgb8	2.68046	1.48388	6.33e-13	3.03e-11
Ccl7	2.40547	4.7692	7.25e-13	3.45e-11
Adgre4	-2.23005	1.54433	8.2e-13	3.89e-11
Wwc1	3.59905	-0.351681	8.22e-13	3.89e-11
Mmp13	1.02537	4.5217	8.43e-13	3.97e-11
Hsph1	0.602128	5.93285	8.63e-13	4.05e-11
Tsc1	0.539824	6.23873	9.92e-13	4.64e-11
Csf1	1.32054	4.7116	1.04e-12	4.83e-11
Dnmt3aos	0.944161	3.66654	1.07e-12	4.96e-11
Cnrip1	0.709341	6.36892	1.18e-12	5.47e-11
Rhov	0.760176	4.48897	1.25e-12	5.76e-11
Il11ra1	1.22914	6.11504	1.27e-12	5.85e-11
Actn1	0.534334	8.38978	1.36e-12	6.24e-11
Emp1	0.57903	9.21072	1.43e-12	6.5e-11
Nup50	0.522127	6.79083	1.45e-12	6.59e-11
Aifm2	0.870296	4.41917	1.53e-12	6.91e-11
Serpine2	-1.53089	3.63392	1.59e-12	7.15e-11
Slamf9	-0.902333	3.83069	1.59e-12	7.15e-11
Mrc1	0.73026	10.3665	1.74e-12	7.81e-11
Lyn	-0.508228	7.55591	1.84e-12	8.22e-11
Cgnl1	-0.800305	4.4846	1.87e-12	8.31e-11
Sema4b	1.04453	3.98394	1.96e-12	8.7e-11
Gm6209	1.51522	2.3928	2.09e-12	9.22e-11
Ncf4	0.814284	6.14022	2.23e-12	9.84e-11
Tiparp	0.652254	5.41989	2.39e-12	1.05e-10
Fam214a	-0.732325	5.17961	2.51e-12	1.1e-10
Pde12	0.647164	5.05197	2.53e-12	1.1e-10
Apol7c	3.11483	3.511	2.61e-12	1.13e-10
Mmp8	1.11972	4.88017	2.66e-12	1.15e-10
Evi2a	-0.713548	7.46783	2.92e-12	1.26e-10
Lsp1	-1.28472	4.76678	2.97e-12	1.28e-10
Tceal9	1.03257	7.7041	3.11e-12	1.33e-10
Igfbp4	-1.18805	6.4234	3.38e-12	1.44e-10
Nfxl1	-0.742163	4.42511	3.39e-12	1.44e-10
Sgsh	-0.628643	5.8519	3.43e-12	1.46e-10
E330009J07Rik	0.930176	3.51812	3.71e-12	1.57e-10
Dusp18	1.25739	2.38818	3.89e-12	1.64e-10
Gsap	-0.831819	3.98157	4.62e-12	1.94e-10
Esd	0.64067	8.81247	4.67e-12	1.96e-10
Tor3a	0.616532	6.03075	4.88e-12	2.04e-10
Rps6kc1	0.679486	5.48734	5.75e-12	2.39e-10
Mettl7a1	0.550829	6.10831	6.07e-12	2.52e-10
Secisbp2l	0.604349	7.70746	6.22e-12	2.57e-10
Ifrd1	0.583827	5.76751	6.47e-12	2.67e-10
Colgalt1	0.645781	7.95642	7.66e-12	3.15e-10
Cnr2	0.67274	5.38597	8.11e-12	3.31e-10
Tex9	2.96312	1.19397	8.08e-12	3.31e-10
Rnasel	-0.833515	7.007	8.25e-12	3.36e-10
Slc37a3	0.583797	4.98082	8.59e-12	3.49e-10
Mitf	0.73308	7.26153	9.87e-12	3.99e-10
Ctla2b	-1.75049	3.69376	9.98e-12	4.03e-10
Dhrs3	0.564311	9.10332	1.03e-11	4.16e-10
Fyb	-0.860582	8.40803	1.06e-11	4.25e-10
Arhgap18	-0.671644	7.59387	1.18e-11	4.7e-10
Rbsn	0.57739	5.55536	1.23e-11	4.89e-10
Acpp	1.98662	2.68001	1.23e-11	4.9e-10
Ccl12	2.65413	1.22062	1.31e-11	5.16e-10
Lpin2	-0.597416	6.22996	1.51e-11	5.91e-10
Ctsk	0.78265	4.98805	1.5e-11	5.91e-10
Tm4sf19	1.15038	3.42711	1.51e-11	5.91e-10
Pdia6	0.597977	7.56575	1.56e-11	6.07e-10
Ldlr	0.712143	6.64803	1.57e-11	6.09e-10
Mcoln2	0.580188	5.98378	2.12e-11	8.21e-10
Cttnbp2nl	-0.532804	6.82614	2.14e-11	8.26e-10
Plk3	1.46006	2.71947	2.3e-11	8.86e-10
Klhl33	2.29708	0.580737	2.45e-11	9.39e-10
Hk2	0.766021	5.73712	2.5e-11	9.58e-10
Zfp609	0.746807	4.98117	2.76e-11	1.05e-09
Cd52	0.649872	6.87449	2.94e-11	1.12e-09
Abca9	-1.09663	4.10593	3.1e-11	1.18e-09
Pde3b	-1.02586	3.62473	3.34e-11	1.25e-09
Cybb	-0.66163	9.08789	3.31e-11	1.25e-09
Sat1	0.611628	8.88244	3.31e-11	1.25e-09
Ttyh2	0.656031	7.46508	3.42e-11	1.28e-09
Clec16a	0.593129	5.11233	3.5e-11	1.31e-09
Mkl2	0.58719	6.92984	3.71e-11	1.38e-09
Ocstamp	2.84321	0.460972	3.86e-11	1.44e-09
Ophn1	-0.593426	5.41106	3.99e-11	1.48e-09
B4galt5	0.632993	7.43999	4.2e-11	1.55e-09
Lpxn	0.75021	7.1046	4.37e-11	1.61e-09
Anxa3	0.506394	8.08506	4.77e-11	1.75e-09
Icosl	-2.15443	0.856149	5.59e-11	2.05e-09
Ctsz	0.606552	9.99363	6.01e-11	2.2e-09
Fbxl4	-0.925312	3.45888	6.37e-11	2.32e-09
Large1	0.563353	6.00824	6.55e-11	2.38e-09
Mapkapk3	0.792134	5.8433	7.15e-11	2.59e-09
Gm15655	-0.901976	4.64827	7.47e-11	2.7e-09
Cacna2d4	2.06316	3.80864	7.75e-11	2.79e-09
Ak8	0.869734	4.4047	8.03e-11	2.88e-09
Galnt10	0.619851	5.33561	8.14e-11	2.91e-09
Cd300ld	0.866644	8.94879	8.28e-11	2.96e-09
Nlrc3	-0.900306	3.49721	8.33e-11	2.97e-09
Adrb2	-1.69046	1.87608	8.49e-11	3.01e-09
Shld1	1.28189	3.9638	8.85e-11	3.14e-09
Fam3c	-0.547438	5.92055	9.05e-11	3.2e-09
Dennd4c	0.511884	8.36516	9.7e-11	3.41e-09
Oit3	0.870622	4.04642	9.87e-11	3.46e-09
Atad2	-0.917093	5.82844	1e-10	3.51e-09
Sdc1	1.12717	5.49	1.05e-10	3.67e-09
Nap1l1	-0.688872	8.05948	1.06e-10	3.68e-09
Actr1b	0.520907	6.43042	1.06e-10	3.68e-09
Gm20056	1.14245	2.93719	1.11e-10	3.84e-09
Cxcr3	-1.66704	1.49038	1.12e-10	3.86e-09
Ly9	0.563498	8.40533	1.21e-10	4.15e-09
Sncaip	-2.27129	1.58584	1.22e-10	4.16e-09
Fdps	0.844299	4.93024	1.25e-10	4.25e-09
Hyou1	0.533777	7.26818	1.31e-10	4.43e-09
Slc39a6	0.528153	6.96725	1.32e-10	4.46e-09
Tpcn2	0.623522	6.63424	1.34e-10	4.51e-09
Pik3cg	-0.619964	6.24328	1.35e-10	4.54e-09
Arl4c	0.677732	6.55884	1.47e-10	4.95e-09
Gpt2	0.689977	4.70505	1.65e-10	5.53e-09
Tnf	-0.836622	3.23439	1.67e-10	5.59e-09
Ahnak	0.606086	10.726	1.76e-10	5.87e-09
Slc30a1	0.677929	7.48009	1.86e-10	6.15e-09
Pole	-1.14594	3.90226	1.87e-10	6.18e-09
Septin11	0.590617	6.23118	1.97e-10	6.48e-09
Dnah2	1.37599	3.10279	2e-10	6.58e-09
Gas6	-0.761169	8.51688	2.13e-10	6.98e-09
B4galt6	-0.696988	8.30318	2.19e-10	7.16e-09
Stab1	-0.919773	8.46488	2.24e-10	7.3e-09
Tmem126b	0.542141	5.32181	2.41e-10	7.81e-09
Sod1	-0.520491	6.98314	2.48e-10	8.03e-09
Ndrg1	-0.783584	5.25285	2.49e-10	8.04e-09
Ckap2	-1.41522	3.1907	2.57e-10	8.28e-09
Slc39a8	-0.811215	4.01013	2.62e-10	8.43e-09
Hjurp	-0.896301	5.51226	2.65e-10	8.49e-09
Nanos1	-1.41069	2.57253	2.66e-10	8.51e-09
Spn	-1.16742	3.02201	2.71e-10	8.64e-09
Oas2	-1.45613	3.76676	2.84e-10	9.04e-09
Afap1	1.24023	2.82238	2.92e-10	9.26e-09
Calr	0.518966	10.2228	3.26e-10	1.03e-08
H2-DMa	1.07339	3.38773	3.52e-10	1.11e-08
Slc24a3	-1.33604	3.03431	3.79e-10	1.19e-08
Rhbdf2	0.731963	5.14166	4.13e-10	1.29e-08
C3	1.33412	4.6419	4.31e-10	1.35e-08
Scimp	2.81589	0.421635	4.41e-10	1.38e-08
Abcg1	0.718152	8.63848	4.69e-10	1.46e-08
Traf3ip3	-1.52602	2.39092	4.73e-10	1.47e-08
Clec4d	-0.540819	8.52478	5.09e-10	1.58e-08
Id2	0.52217	7.32131	5.14e-10	1.59e-08
Ercc6	0.60514	5.44937	5.57e-10	1.72e-08
Wsb2	0.677939	7.6505	5.72e-10	1.76e-08
Dock4	0.599469	4.98698	6.24e-10	1.92e-08
N4bp1	0.583736	6.13222	6.38e-10	1.95e-08
Abcg3	-0.966939	3.4387	6.69e-10	2.04e-08
Edem2	0.548148	6.10034	6.72e-10	2.05e-08
Cpd	-0.668265	7.6289	7.44e-10	2.26e-08
Havcr2	-0.832765	4.84111	8.23e-10	2.49e-08
Tacr1	2.06872	1.5174	8.58e-10	2.59e-08
Cd63	0.532548	9.6444	8.69e-10	2.62e-08
Mgat1	0.893723	6.96623	8.9e-10	2.67e-08
Lig1	-0.969888	4.89453	9e-10	2.7e-08
Tbc1d16	0.834766	3.851	1.05e-09	3.13e-08
Fmnl3	-0.518869	5.35156	1.07e-09	3.2e-08
Ccl4	-1.15821	4.84134	1.1e-09	3.28e-08
Mgst1	0.734121	7.43822	1.21e-09	3.58e-08
Gm5615	2.49352	1.44874	1.24e-09	3.66e-08
Csrnp1	1.19486	2.52592	1.28e-09	3.77e-08
Tspan14	0.635532	7.07794	1.28e-09	3.78e-08
Lgals3	0.607606	12.2483	1.31e-09	3.84e-08
Abcb1b	-0.841108	5.11741	1.39e-09	4.05e-08
St3gal6	-2.2141	0.85478	1.42e-09	4.15e-08
Camk1	-0.52841	6.50647	1.53e-09	4.45e-08
Fam124a	1.93831	2.03806	1.55e-09	4.5e-08
Nxpe1-ps	-1.50053	1.37113	1.65e-09	4.77e-08
H2-T23	0.77946	7.15972	1.65e-09	4.77e-08
Gpr34	-1.28713	2.94797	1.7e-09	4.91e-08
Litaf	0.538612	8.92067	1.74e-09	4.99e-08
Mvd	0.92108	3.62301	1.77e-09	5.06e-08
Cd22	0.914454	4.54386	1.78e-09	5.07e-08
Iqgap3	-1.06745	4.35168	1.79e-09	5.08e-08
Lat	1.14357	2.18633	1.79e-09	5.08e-08
Dut	1.0831	3.77612	1.88e-09	5.33e-08
Fhod1	-0.742839	4.45456	1.89e-09	5.35e-08
Rnd3	-1.53084	1.7655	1.92e-09	5.42e-08
Lmna	0.636738	7.81163	1.96e-09	5.49e-08
Cdk20	0.803784	4.83655	2.03e-09	5.69e-08
Mlxip	0.539136	6.38434	2.05e-09	5.72e-08
Gsto1	0.561841	6.03484	2.09e-09	5.82e-08
P3h3	-0.685793	3.66351	2.11e-09	5.85e-08
Ccl3	-1.02947	5.54272	2.22e-09	6.16e-08
Cxcl10	-2.78258	0.0587174	2.3e-09	6.37e-08
Tfdp2	-0.738645	3.65558	2.32e-09	6.4e-08
Mex3b	-1.70266	0.798362	2.34e-09	6.42e-08
Abcc3	-0.546047	7.2031	2.52e-09	6.92e-08
Gng2	-0.578999	7.30344	2.55e-09	6.96e-08
6030408B16Rik	2.00324	3.71267	2.65e-09	7.21e-08
Ctnnb1	0.530901	8.84993	2.85e-09	7.73e-08
Plxdc2	1.05994	4.86511	2.86e-09	7.73e-08
Gm15601	1.75239	1.7797	2.91e-09	7.87e-08
Htr1b	2.33533	1.31377	2.96e-09	7.97e-08
Gmnn	-0.661276	4.36473	2.97e-09	8e-08
Atp6v1b2	0.688442	10.4757	3.08e-09	8.26e-08
Ahnak2	0.609676	8.06728	3.22e-09	8.63e-08
Numbl	0.871164	2.96214	3.24e-09	8.68e-08
Tmem176a	-1.32516	2.10336	3.36e-09	8.96e-08
Sgo2a	-1.26471	3.75179	3.68e-09	9.78e-08
Nampt	0.608566	7.65285	3.87e-09	1.02e-07
Prune1	0.5237	5.66487	4.25e-09	1.12e-07
Birc5	-1.11846	4.08453	4.55e-09	1.2e-07
Prps1	1.02986	3.80816	4.68e-09	1.23e-07
Batf3	1.8726	1.87035	4.73e-09	1.24e-07
Gm47123	1.099	4.0812	4.9e-09	1.28e-07
Trim36	0.837712	3.69671	5.01e-09	1.3e-07
Gpr162	-0.82277	5.0781	5.07e-09	1.31e-07
Hmgcs1	0.703006	7.39607	5.29e-09	1.37e-07
Marchf10	3.3043	0.131774	5.31e-09	1.37e-07
Gpnmb	0.506299	13.9065	5.48e-09	1.41e-07
Pilra	-1.50119	2.83438	5.58e-09	1.43e-07
Nt5dc2	-0.907828	5.08334	5.67e-09	1.45e-07
Acp5	1.44356	4.27769	5.99e-09	1.53e-07
Pdgfb	-0.833554	5.09079	6.15e-09	1.57e-07
Cped1	-1.20391	2.32281	6.8e-09	1.73e-07
Kynu	1.935	0.690872	7.84e-09	1.99e-07
Bub1b	-0.969851	4.46973	7.98e-09	2.02e-07
Mcm7	-0.835149	4.99431	7.97e-09	2.02e-07
Psap	0.619171	14.3014	8.04e-09	2.03e-07
Auh	0.658421	4.33909	8.36e-09	2.1e-07
AC166110.3	-1.57759	3.15998	8.68e-09	2.17e-07
Limk1	0.635011	4.68705	8.74e-09	2.18e-07
Top2a	-1.17143	7.06721	8.93e-09	2.22e-07
Fads3	0.94113	2.95225	8.94e-09	2.22e-07
Mrgpre	0.635393	4.46487	9.04e-09	2.24e-07
Mcm3	-0.665492	5.57662	9.23e-09	2.28e-07
Mfhas1	0.588358	6.19316	9.51e-09	2.35e-07
Proz	0.978518	2.3121	1.02e-08	2.51e-07
AU020206	0.525988	5.46625	1.07e-08	2.62e-07
Stra6l	0.614942	4.67204	1.07e-08	2.63e-07
Cdc20	-1.16382	3.1319	1.14e-08	2.8e-07
Ncapd3	-0.718409	4.45328	1.17e-08	2.86e-07
Ehd1	-0.607665	5.24599	1.2e-08	2.93e-07
Ifit2	-1.29411	4.69825	1.26e-08	3.06e-07
Ankrd55	1.12298	3.03644	1.26e-08	3.06e-07
Tapbp	0.666937	8.10811	1.29e-08	3.13e-07
Il16	-1.08931	3.44433	1.38e-08	3.34e-07
Kif15	-1.13482	3.87785	1.39e-08	3.35e-07
Mafb	0.571542	8.14979	1.42e-08	3.4e-07
Cd33	-1.00729	3.81716	1.44e-08	3.46e-07
Rcbtb2	-0.530611	7.3843	1.51e-08	3.63e-07
Ptchd1	-1.14985	2.52165	1.55e-08	3.7e-07
Cd302	-0.603084	5.17675	1.55e-08	3.71e-07
Tceal8	0.84355	6.32255	1.58e-08	3.77e-07
Gab3	-0.793545	3.17465	1.68e-08	4e-07
Slc27a6	2.34718	0.0320689	1.69e-08	4.02e-07
F630040K05Rik	1.56593	3.23134	1.7e-08	4.03e-07
Cenpe	-1.16588	5.32813	1.76e-08	4.15e-07
Gm14221	-1.52911	2.24586	1.81e-08	4.26e-07
Vat1	0.553768	9.98907	1.82e-08	4.27e-07
Racgap1	-1.0915	5.1501	1.84e-08	4.3e-07
Tbc1d31	-0.832669	4.21214	2.02e-08	4.71e-07
Lpar6	-0.743766	5.14508	2.03e-08	4.72e-07
Prc1	-1.05177	5.49132	2.04e-08	4.75e-07
Nlrp1b	-0.62085	4.45168	2.04e-08	4.75e-07
Hfe	0.631979	5.80748	2.07e-08	4.8e-07
Tmsb4x	-0.581824	11.0258	2.09e-08	4.85e-07
Ticrr	-1.19968	2.58931	2.17e-08	5e-07
Gdpd5	-0.804241	3.43763	2.17e-08	5e-07
Gm6377	-1.71746	2.59903	2.21e-08	5.07e-07
Ets2	-0.708181	4.58191	2.24e-08	5.15e-07
Abcb4	-0.747083	4.48636	2.25e-08	5.16e-07
Hpgds	-0.629769	8.41123	2.4e-08	5.48e-07
Sdc4	0.811151	7.71567	2.54e-08	5.77e-07
Ccl8	2.26294	2.23883	2.61e-08	5.92e-07
B3galnt1	-0.592288	5.07249	2.64e-08	5.96e-07
Fzd1	1.10899	2.7519	2.64e-08	5.96e-07
Aoah	-0.816234	4.79754	2.67e-08	6.03e-07
Lmnb1	-1.06766	4.3549	2.82e-08	6.35e-07
Ccl6	0.659311	9.22673	2.85e-08	6.41e-07
Ndc80	-1.12011	4.05423	3.08e-08	6.89e-07
Rel	0.530066	5.84611	3.12e-08	6.96e-07
Gm37199	2.54066	0.014048	3.28e-08	7.3e-07
Rin3	0.669644	5.44977	3.44e-08	7.65e-07
Tusc3	0.620359	5.28138	3.74e-08	8.29e-07
Aspm	-1.17082	4.25531	3.78e-08	8.37e-07
Wdr91	0.580963	7.03296	3.89e-08	8.59e-07
Pcyt1b	-1.47421	1.02442	3.94e-08	8.67e-07
Galnt9	1.78909	0.901479	3.95e-08	8.69e-07
Stil	-1.32731	3.1002	4.07e-08	8.93e-07
Rhoh	0.713414	3.62871	4.23e-08	9.26e-07
Mctp1	-0.711144	6.116	4.43e-08	9.66e-07
Plk1	-1.1778	3.88025	4.55e-08	9.92e-07
Gmfg	-0.726262	4.30731	4.79e-08	1.04e-06
4933439C10Rik	-1.20373	2.13001	4.91e-08	1.07e-06
Ablim1	2.40429	0.386228	5e-08	1.08e-06
Fzd7	0.51456	5.86441	5.05e-08	1.09e-06
Basp1	-0.63544	7.6428	5.11e-08	1.1e-06
Dram1	0.720525	5.13879	5.17e-08	1.11e-06
Nusap1	-1.2089	4.47448	5.24e-08	1.12e-06
Brca2	-0.810833	3.37689	5.38e-08	1.15e-06
St3gal5	-0.849299	4.33144	5.49e-08	1.18e-06
Rassf8	0.612452	6.47821	5.52e-08	1.18e-06
Cenpf	-1.29214	4.59405	5.65e-08	1.2e-06
Neil3	-1.16247	2.93749	5.7e-08	1.21e-06
Tnfrsf1b	0.543183	9.011	5.7e-08	1.21e-06
Slc35b1	0.517946	5.05459	5.79e-08	1.22e-06
Ccnd3	-0.948853	3.82674	5.96e-08	1.26e-06
Rrm1	-0.77922	6.44942	6e-08	1.26e-06
Gm8221	3.82045	0.585601	5.99e-08	1.26e-06
Creld2	0.531334	4.49779	6.15e-08	1.29e-06
Ppp1r13b	-0.624681	4.19264	6.26e-08	1.31e-06
Kif20a	-0.993897	4.85396	6.29e-08	1.32e-06
Slfn9	-0.982866	5.70882	6.59e-08	1.38e-06
Iqgap2	-0.628323	6.3014	6.63e-08	1.38e-06
Espl1	-0.953231	3.28358	7e-08	1.46e-06
Phka1	-0.703019	3.09395	7.05e-08	1.46e-06
Gpr65	0.594612	6.54597	7.1e-08	1.47e-06
Asf1b	-0.976643	3.86742	7.24e-08	1.49e-06
Sqle	0.611866	6.02135	7.27e-08	1.5e-06
Sardh	1.24665	2.31067	7.3e-08	1.5e-06
Lbr	-0.675547	4.52944	7.56e-08	1.55e-06
Clspn	-1.19195	4.28977	7.71e-08	1.58e-06
Nrg1	2.51894	0.225108	7.85e-08	1.6e-06
Fabp4	0.806106	8.46783	8.21e-08	1.68e-06
Rtp4	-1.0564	4.09902	8.45e-08	1.71e-06
Pgam1	0.526589	8.94948	8.43e-08	1.71e-06
Nxn	1.39204	1.80536	8.44e-08	1.71e-06
Rasgrp1	2.66847	-0.0579356	8.44e-08	1.71e-06
Ccnb2	-1.14352	3.93227	8.89e-08	1.8e-06
Rgs2	-0.640755	7.09611	8.98e-08	1.81e-06
Dhfr	-0.962913	3.81918	9.14e-08	1.84e-06
Aldh1a2	2.82309	0.105122	9.2e-08	1.85e-06
Cx3cr1	-2.55113	-0.151668	9.24e-08	1.86e-06
St6galnac4	0.743264	6.07288	9.31e-08	1.87e-06
Lrrc8b	0.527502	5.09276	9.59e-08	1.92e-06
Ifitm3	-1.12239	5.09576	9.71e-08	1.94e-06
Psd3	-0.821367	6.16844	9.69e-08	1.94e-06
Tnfrsf23	0.761462	3.74591	1.03e-07	2.05e-06
Fcrls	0.536409	5.40505	1.04e-07	2.07e-06
Trpm2	-1.07116	1.99517	1.05e-07	2.09e-06
Ncaph	-1.09213	4.3441	1.09e-07	2.15e-06
Cdkn2c	-0.98321	4.25608	1.16e-07	2.29e-06
Fignl1	-1.06969	3.78572	1.31e-07	2.57e-06
Eid1	-0.637316	6.52875	1.35e-07	2.64e-06
Ogfrl1	-0.719328	4.77204	1.43e-07	2.8e-06
Cenpk	-1.24809	2.12776	1.44e-07	2.81e-06
Creb3l2	0.610423	4.524	1.58e-07	3.07e-06
Slc18a1	0.773478	3.67357	1.59e-07	3.09e-06
Brip1	-0.941577	3.67774	1.62e-07	3.15e-06
Cdca2	-1.13765	3.19796	1.64e-07	3.17e-06
Pmp22	-0.556408	8.76947	1.63e-07	3.17e-06
Daglb	0.666421	7.95584	1.7e-07	3.27e-06
Nectin4	-0.624169	3.58635	1.71e-07	3.3e-06
Tox2	-1.1703	3.79781	1.78e-07	3.42e-06
Sh3tc1	0.661316	5.36448	1.78e-07	3.43e-06
Nyap2	1.66026	1.3227	1.79e-07	3.44e-06
Hhat	1.22707	1.10411	1.82e-07	3.48e-06
Ptprn	1.00373	2.08303	1.89e-07	3.61e-06
Gm42031	-0.931856	6.47819	1.9e-07	3.62e-06
Ralgps2	-0.820007	2.76682	1.91e-07	3.64e-06
Cp	-1.2122	2.07565	1.91e-07	3.65e-06
Evl	0.612677	8.58412	1.95e-07	3.71e-06
Ifi206	-2.37152	0.945494	1.99e-07	3.77e-06
Pgap1	0.633717	7.82601	1.99e-07	3.78e-06
Bcl2a1b	0.600365	6.87017	2.04e-07	3.87e-06
Knl1	-1.11746	4.02558	2.09e-07	3.94e-06
Ccdc88a	0.856307	6.96807	2.09e-07	3.94e-06
Zbtb16	-1.67273	0.792247	2.1e-07	3.96e-06
Arhgap25	0.579556	8.51902	2.12e-07	3.98e-06
Csf3r	0.532534	6.2726	2.31e-07	4.32e-06
Stac2	0.513559	5.24357	2.45e-07	4.57e-06
Peg13	-0.53549	4.53496	2.51e-07	4.67e-06
Gm4951	1.53096	1.63788	2.53e-07	4.7e-06
Ckap2l	-1.15457	4.107	2.55e-07	4.73e-06
Kdm6b	0.748193	4.52356	2.66e-07	4.93e-06
Gabre	2.05418	1.80931	2.69e-07	4.98e-06
Penk	1.11256	2.35588	2.82e-07	5.2e-06
Ankrd28	-0.543176	6.18608	2.91e-07	5.36e-06
Ccna2	-1.17499	5.45785	2.95e-07	5.41e-06
Hmgb2	-0.914678	4.00502	2.94e-07	5.41e-06
Hk3	0.633889	8.64998	2.95e-07	5.41e-06
Nxpe5	-0.524478	5.11335	2.97e-07	5.43e-06
Nbeal2	-0.61147	5.12389	3.06e-07	5.59e-06
Kntc1	-1.13051	4.35436	3.1e-07	5.65e-06
Tle3	0.503557	5.72507	3.13e-07	5.71e-06
Pcyox1l	0.946797	2.7114	3.17e-07	5.77e-06
Arhgap28	0.949515	1.98601	3.26e-07	5.92e-06
Kif11	-1.07278	4.99481	3.38e-07	6.13e-06
Pbk	-1.18973	3.57256	3.46e-07	6.26e-06
Slc45a4	-0.51133	5.6729	3.61e-07	6.53e-06
Anln	-1.14583	4.99711	3.64e-07	6.55e-06
Arhgef39	-1.18319	1.79034	3.79e-07	6.82e-06
Rad54l	-0.712133	3.65997	3.96e-07	7.11e-06
Ifit1	-1.4537	2.8721	4.04e-07	7.24e-06
Hmmr	-1.02023	4.87752	4.11e-07	7.34e-06
Oip5	-1.23568	2.02445	4.14e-07	7.39e-06
Mcm4	-0.607513	5.66924	4.15e-07	7.41e-06
Kif20b	-1.06379	4.56497	4.29e-07	7.64e-06
Slc28a2	-0.540711	4.79328	4.39e-07	7.81e-06
Knstrn	-1.14812	3.69509	4.43e-07	7.86e-06
C030034L19Rik	-1.21589	1.3901	4.45e-07	7.89e-06
Tlr8	0.550834	8.47053	4.61e-07	8.12e-06
Mki67	-1.08268	7.52828	4.63e-07	8.15e-06
Rhoc	0.592329	6.6029	4.72e-07	8.29e-06
Gm20634	0.746338	4.11636	4.72e-07	8.29e-06
Rassf4	-0.508596	8.04193	4.76e-07	8.35e-06
Arhgap4	-0.591697	4.40617	4.79e-07	8.38e-06
Gm15760	1.0252	2.09372	4.83e-07	8.43e-06
Cd320	0.999045	2.15552	4.92e-07	8.57e-06
Igsf6	0.583157	7.20331	5.12e-07	8.91e-06
Brca1	-0.72067	4.24784	5.39e-07	9.34e-06
Evi2b	-0.854339	7.65505	5.55e-07	9.6e-06
Phf19	-1.26063	2.67539	5.66e-07	9.77e-06
Uhrf1	-1.00565	5.08156	5.66e-07	9.77e-06
Ms4a4c	-2.01873	0.484731	5.82e-07	1e-05
Ncapd2	-0.945199	5.12999	5.85e-07	1e-05
Alox5ap	-0.543542	6.90912	5.96e-07	1.02e-05
Tusc1	0.63574	4.41865	6.04e-07	1.03e-05
Spc25	-0.901798	4.1445	6.1e-07	1.04e-05
Sez6l2	-1.1988	1.53084	6.2e-07	1.05e-05
2210406H18Rik	0.781646	2.97508	6.12e-07	1.05e-05
Lilr4b	-0.558241	9.63894	6.22e-07	1.06e-05
F13a1	-1.07682	2.60583	6.32e-07	1.07e-05
Pgm2l1	-0.637466	5.19205	6.48e-07	1.09e-05
Mfsd6	-0.535037	5.10863	6.47e-07	1.09e-05
Poc1b	-0.578036	3.86607	6.58e-07	1.11e-05
Crim1	-0.784262	3.24131	6.68e-07	1.12e-05
Mthfr	-0.529402	4.96593	6.87e-07	1.15e-05
Spred3	-1.19205	1.44497	6.92e-07	1.16e-05
Susd1	-0.702273	3.17406	7.07e-07	1.18e-05
Gm49151	1.65637	3.63323	7.17e-07	1.2e-05
Ccdc88c	1.89105	1.14703	7.4e-07	1.24e-05
4930503L19Rik	-0.695609	4.29416	7.59e-07	1.26e-05
Ednrb	1.14905	5.58191	7.61e-07	1.27e-05
Socs1	2.32497	0.912108	7.76e-07	1.29e-05
E2f8	-1.00498	3.97611	7.88e-07	1.31e-05
Rrm2	-1.04302	5.2237	8.06e-07	1.33e-05
Itgal	-0.871645	2.89348	8.08e-07	1.34e-05
Hmgcr	0.504977	6.35548	8.39e-07	1.38e-05
Ppargc1b	1.17756	1.46119	8.34e-07	1.38e-05
Mad2l1	-0.757785	4.96698	8.48e-07	1.39e-05
Samhd1	0.523019	8.59643	8.43e-07	1.39e-05
Incenp	-0.687389	6.03908	8.61e-07	1.41e-05
D430020J02Rik	-1.32621	1.51945	8.66e-07	1.42e-05
Dennd2c	-1.1203	2.35987	8.67e-07	1.42e-05
Septin 9	0.512019	8.17805	8.77e-07	1.44e-05
4930523C07Rik	-1.3595	1.03854	8.88e-07	1.45e-05
Cdk14	-0.694376	6.36609	9.07e-07	1.48e-05
Nuak1	-0.73268	3.66728	9.15e-07	1.49e-05
Heca	-0.611159	4.87641	9.25e-07	1.51e-05
Prr11	-1.04747	4.25498	9.49e-07	1.54e-05
Evi2	-0.752589	4.3512	9.48e-07	1.54e-05
Dab2ip	1.25951	1.34158	9.52e-07	1.54e-05
Galnt15	1.91487	-0.0450926	9.47e-07	1.54e-05
Il12rb1	2.11287	-0.0597761	9.61e-07	1.55e-05
Mybl2	-1.19284	2.71193	1.05e-06	1.68e-05
Mcm6	-0.685645	6.7417	1.06e-06	1.69e-05
Plxnd1	0.588011	7.98126	1.05e-06	1.69e-05
Bend4	-0.505198	4.32612	1.07e-06	1.7e-05
Ttc27	0.630156	3.8919	1.07e-06	1.7e-05
Pi4k2a	0.587465	7.38657	1.1e-06	1.75e-05
Prkaa2	1.48435	1.23454	1.13e-06	1.8e-05
Jsrp1	1.74786	0.33912	1.16e-06	1.84e-05
Zwilch	-0.848403	3.8788	1.17e-06	1.86e-05
Rasal3	0.591888	3.92665	1.19e-06	1.88e-05
Mcm5	-0.820542	5.41767	1.2e-06	1.89e-05
E2f7	-1.07062	2.93273	1.23e-06	1.93e-05
Pgm5	0.969023	2.01429	1.23e-06	1.93e-05
Cep55	-1.04764	3.81467	1.26e-06	1.97e-05
Arrdc4	0.508348	4.15711	1.29e-06	2.02e-05
Dolpp1	0.594978	3.91379	1.29e-06	2.02e-05
Dlgap5	-1.00386	4.14654	1.3e-06	2.03e-05
Dusp6	-0.862701	4.3016	1.3e-06	2.03e-05
E2f2	-0.925434	3.06067	1.32e-06	2.06e-05
Cdc42ep3	-0.642751	3.35532	1.33e-06	2.06e-05
Gm11808	-3.75003	0.858616	1.36e-06	2.11e-05
Cdk1	-0.908906	4.95552	1.39e-06	2.15e-05
Neurl3	-0.570139	6.5448	1.4e-06	2.16e-05
Exo5	0.536298	4.02134	1.41e-06	2.18e-05
Cenpq	-1.16455	3.09292	1.42e-06	2.19e-05
C1qa	-0.731095	5.80802	1.42e-06	2.19e-05
Cdc45	-0.951215	2.91983	1.43e-06	2.21e-05
Nuf2	-1.13355	4.14173	1.44e-06	2.22e-05
Ammecr1	0.646115	3.88715	1.48e-06	2.27e-05
Pilrb2	-1.78991	1.44482	1.5e-06	2.29e-05
Chn2	-0.826575	3.25065	1.51e-06	2.31e-05
Spag5	-1.11676	3.78879	1.52e-06	2.32e-05
Nab2	0.54183	5.40734	1.52e-06	2.32e-05
Lancl3	2.26765	0.103137	1.54e-06	2.34e-05
Egr3	-2.2408	-0.119108	1.57e-06	2.39e-05
Pld4	-0.538776	6.27772	1.57e-06	2.39e-05
Foxm1	-1.06905	4.19606	1.58e-06	2.41e-05
Ncapg	-0.996843	4.00454	1.61e-06	2.43e-05
Map4k2	-0.567059	3.67207	1.6e-06	2.43e-05
Il1rl1	1.0671	1.68298	1.69e-06	2.55e-05
Adhfe1	1.45909	0.764088	1.69e-06	2.55e-05
Gramd4	0.87614	3.04237	1.71e-06	2.57e-05
Sdf2l1	0.665801	5.95561	1.72e-06	2.58e-05
Osgep	0.551889	4.75491	1.72e-06	2.59e-05
Dtl	-1.03057	3.52961	1.75e-06	2.63e-05
Mis18bp1	-0.960125	4.10701	1.77e-06	2.65e-05
Jag1	-0.88292	3.63536	1.78e-06	2.67e-05
Klf11	-0.797868	3.26809	1.79e-06	2.67e-05
Rapgef5	-0.865401	4.15901	1.79e-06	2.68e-05
Nsd2	-0.536006	6.10503	1.79e-06	2.68e-05
Tpx2	-0.836168	5.41	1.83e-06	2.73e-05
Ifit3b	-1.96148	1.29763	1.87e-06	2.78e-05
Cdc6	-1.02609	2.81214	1.89e-06	2.81e-05
Pik3r3	1.24894	1.17475	1.93e-06	2.86e-05
Sfxn5	-0.669146	3.27397	2.01e-06	2.97e-05
Ralgps1	-0.786697	3.2398	2.05e-06	3.02e-05
Acot1	-2.1124	0.381468	2.08e-06	3.06e-05
Dmpk	-1.50499	0.973566	2.12e-06	3.11e-05
Rilpl2	0.654582	6.15412	2.19e-06	3.21e-05
Mmp12	0.653135	11.2805	2.2e-06	3.22e-05
Kif23	-0.815982	5.11323	2.27e-06	3.32e-05
Mastl	-1.17654	3.72224	2.36e-06	3.44e-05
Pot1b	-0.628363	3.90873	2.36e-06	3.44e-05
Slc2a6	1.39105	1.56078	2.4e-06	3.48e-05
Tonsl	-1.04743	2.265	2.42e-06	3.51e-05
Ppp1r9a	-1.05246	2.25806	2.48e-06	3.58e-05
Nt5dc3	0.508557	5.50702	2.73e-06	3.93e-05
Fndc3a	0.51358	7.48607	2.78e-06	3.99e-05
Sgo1	-1.14207	2.60921	2.94e-06	4.21e-05
Bard1	-1.04729	2.70602	2.96e-06	4.23e-05
Eri2	-0.71577	3.10076	2.96e-06	4.23e-05
Cdc25b	-0.867653	4.15647	2.98e-06	4.26e-05
Trim59	-1.10126	3.74284	3.07e-06	4.37e-05
Depdc1b	-1.35623	1.51408	3.08e-06	4.38e-05
Eme1	-1.15183	2.0465	3.15e-06	4.47e-05
Lama3	-1.05463	2.09291	3.15e-06	4.47e-05
Sesn3	-0.583605	3.85628	3.15e-06	4.47e-05
Maff	1.15678	1.39663	3.15e-06	4.47e-05
Ltb4r1	2.10645	-0.111847	3.18e-06	4.5e-05
Tapbpl	0.648556	3.99541	3.19e-06	4.51e-05
Gpr183	0.695048	3.73035	3.21e-06	4.52e-05
Sys1	0.743319	3.67502	3.2e-06	4.52e-05
Ska2	-0.99278	3.24069	3.31e-06	4.65e-05
Rad18	-0.75686	3.5027	3.35e-06	4.71e-05
Asb4	0.737711	3.06202	3.35e-06	4.71e-05
Tmem158	1.00671	2.23174	3.6e-06	5.05e-05
Rgs1	-0.664755	7.24051	3.61e-06	5.06e-05
Vash2	-0.844458	2.11595	3.62e-06	5.07e-05
Aph1c	0.544247	6.98655	3.63e-06	5.08e-05
Ly86	-0.588674	5.0471	3.69e-06	5.16e-05
Stmn1	-0.838475	6.44289	4.13e-06	5.72e-05
Rrad	-1.83274	0.131411	4.26e-06	5.88e-05
Pilrb1	-1.70768	0.834372	4.26e-06	5.88e-05
Ifi203	-0.613677	5.57055	4.32e-06	5.94e-05
Pclaf	-1.02461	4.81935	4.39e-06	6.01e-05
Ect2	-0.926666	4.19203	4.39e-06	6.01e-05
Psip1	-0.765687	4.45013	4.39e-06	6.01e-05
Cip2a	-0.844572	4.32613	4.49e-06	6.12e-05
Xaf1	-0.765362	3.0977	4.49e-06	6.12e-05
Ifit1bl1	-2.01627	0.470866	4.64e-06	6.31e-05
Smc2	-0.749736	5.94797	4.64e-06	6.31e-05
Recql4	-1.33607	0.907496	4.65e-06	6.32e-05
Tspan13	-0.520589	5.49426	4.72e-06	6.39e-05
Prickle2	1.0052	2.26249	4.72e-06	6.39e-05
I830077J02Rik	-0.918581	2.43525	4.77e-06	6.44e-05
Id3	-1.46835	0.998998	4.87e-06	6.57e-05
Clec10a	0.825302	3.72311	4.9e-06	6.59e-05
Il13ra1	-0.734032	3.99964	5.02e-06	6.73e-05
H2afv	-0.687975	3.84556	5.04e-06	6.75e-05
Mcm10	-0.962628	3.58792	5.21e-06	6.95e-05
Prim1	-0.863321	3.1229	5.25e-06	7e-05
Lpcat2	-0.757496	4.35144	5.29e-06	7.04e-05
P4ha2	-0.687902	3.21422	5.36e-06	7.11e-05
Psme2	0.535441	6.23835	5.35e-06	7.11e-05
Zbtb5	0.586927	3.5021	5.38e-06	7.12e-05
Olfr1438-ps1	1.75787	1.5591	5.38e-06	7.12e-05
Rad54b	-1.17312	2.28648	5.44e-06	7.19e-05
Lcp2	-0.526531	6.45417	5.48e-06	7.23e-05
Pimreg	-1.14045	3.15076	5.52e-06	7.28e-05
Matn2	-1.30666	0.774152	5.57e-06	7.33e-05
Diaph3	-0.842868	4.69197	5.65e-06	7.43e-05
Kif4	-0.942156	4.07819	5.75e-06	7.55e-05
H2-DMb1	0.586353	4.29673	5.92e-06	7.76e-05
Tk1	-0.738449	4.20572	6.13e-06	8.03e-05
Rad51c	-1.49678	0.706171	6.4e-06	8.32e-05
Mcm2	-0.616505	5.20904	6.5e-06	8.45e-05
Ezh2	-0.805351	4.29113	6.53e-06	8.48e-05
Cav2	-0.721947	5.81703	6.54e-06	8.48e-05
Mbd4	-0.55095	3.16958	6.57e-06	8.51e-05
Fanci	-1.03389	2.79791	6.83e-06	8.84e-05
Cenpn	-0.950335	2.62063	7.33e-06	9.38e-05
Etl4	-0.90323	3.25688	7.32e-06	9.38e-05
Il27ra	1.10942	1.46396	7.32e-06	9.38e-05
Primpol	-0.576261	3.48316	7.44e-06	9.51e-05
Gm48161	0.584767	6.67962	7.51e-06	9.59e-05
Ddx60	-0.730826	3.65323	7.59e-06	9.66e-05
Tmem38a	-0.978911	1.71785	7.72e-06	9.82e-05
Nhsl2	-0.90355	2.44693	8.01e-06	0.000101856
Cst7	1.38488	1.34317	8.4e-06	0.000106124
Mink1	0.513704	7.06756	8.74e-06	0.000109893
Ercc6l	-0.945144	3.61532	9.36e-06	0.000117235
Trip13	-0.893902	2.63131	9.58e-06	0.000119676
Cdca7l	-0.564943	4.83193	9.71e-06	0.000121116
Akr1b8	-0.544382	4.83866	9.78e-06	0.000121873
Gm15975	7.42993	1.4018	9.88e-06	0.000122948
Aurka	-0.866616	3.45354	9.93e-06	0.000123364
Cd5l	-0.610069	11.1099	9.97e-06	0.00012377
Cit	-1.10498	3.56035	1.01e-05	0.000125208
Bank1	-1.34663	2.21315	1.06e-05	0.000131637
Itga1	1.31417	0.985999	1.07e-05	0.000132311
Mfsd12	0.525996	8.75541	1.08e-05	0.000133133
Ptpn18	-0.720969	4.09812	1.09e-05	0.00013444
Nsmf	0.581322	3.88529	1.14e-05	0.000140141
Galnt12	-0.571215	3.12754	1.15e-05	0.0001406
Tmpo	-0.659233	6.53407	1.15e-05	0.000141028
Parp8	-0.516882	3.96329	1.19e-05	0.000145466
Neurl1b	-0.989551	1.71151	1.2e-05	0.000146044
Cebpb	0.718696	5.12202	1.22e-05	0.000148923
Card11	-1.06646	3.62963	1.24e-05	0.000150104
Hmgb3	-0.923062	3.11225	1.27e-05	0.000153638
Il18	-0.709053	2.9332	1.27e-05	0.00015425
Spdl1	-0.759815	4.69194	1.29e-05	0.000155795
Tacc3	-0.667651	4.80308	1.3e-05	0.000157302
Fgf13	-1.14754	1.1666	1.31e-05	0.00015834
Kif18b	-1.10196	2.49259	1.31e-05	0.00015834
Prr5l	0.789032	2.4844	1.32e-05	0.000158833
Samd4	-0.544789	4.67287	1.34e-05	0.000161285
Ttk	-1.00717	2.87041	1.39e-05	0.00016614
Frat2	-1.1445	1.7527	1.39e-05	0.000166556
Rad51	-0.929929	3.67874	1.43e-05	0.000170488
Melk	-1.01748	3.28662	1.45e-05	0.000172008
Ube2c	-0.894795	4.05131	1.45e-05	0.000172148
Irf7	-1.03959	2.99697	1.47e-05	0.000174141
Tent5a	0.508482	6.05429	1.48e-05	0.000175575
Echs1	0.511903	5.83951	1.48e-05	0.000175575
Ccnb1	-0.900592	4.58695	1.55e-05	0.000183711
Map3k9	-0.738082	2.77004	1.57e-05	0.000184592
Gm16287	0.787701	2.0675	1.56e-05	0.000184592
Fam111a	-0.561512	7.20279	1.58e-05	0.000186081
Zranb3	-0.585325	5.26317	1.58e-05	0.000186155
Dmwd	-1.28117	1.03786	1.59e-05	0.000186877
Gmds	-0.817248	2.67269	1.62e-05	0.000190624
Sgip1	1.1769	2.24665	1.65e-05	0.000193048
Slc43a3	-0.784579	3.31692	1.67e-05	0.000195192
Esco2	-1.2395	2.78529	1.69e-05	0.000197541
Slc39a12	0.687686	2.15687	1.7e-05	0.00019806
Kif22	-0.945874	3.46684	1.75e-05	0.000203175
Src	0.641155	4.41803	1.76e-05	0.000203948
Hells	-0.852477	3.87396	1.76e-05	0.000204648
Gm43305	-0.684903	8.38595	1.77e-05	0.000205009
Xkr5	-1.89434	-0.0131163	1.78e-05	0.000205736
Hebp2	1.63388	0.359537	1.89e-05	0.000216849
Nr4a1	-1.38254	0.754994	1.9e-05	0.00021803
Cdca7	-0.894223	2.76305	1.97e-05	0.000224704
Tagap	-0.912728	2.19293	2.01e-05	0.000229231
Plscr4	-0.536814	4.178	2.02e-05	0.000230283
Vipr1	1.45537	1.20789	2.09e-05	0.000237794
P2ry13	-1.10909	1.62595	2.13e-05	0.000241725
Idi1	0.590988	5.47659	2.19e-05	0.000248075
Pmepa1	2.21313	0.147243	2.21e-05	0.000250148
Gm7008	1.05114	1.39025	2.25e-05	0.000253741
Nek2	-1.04217	3.45131	2.28e-05	0.00025771
Donson	-0.625322	3.00626	2.28e-05	0.00025771
Cntln	-0.766015	3.32373	2.42e-05	0.000272017
Cdca3	-0.911941	4.25777	2.51e-05	0.000281557
Gm49125	1.60963	1.18624	2.51e-05	0.000281772
St6galnac6	0.555357	4.98532	2.59e-05	0.000289473
Shcbp1	-0.978715	3.23688	2.67e-05	0.000297903
Rgs18	-0.592738	5.51827	2.76e-05	0.00030632
Ccdc14	-0.767182	2.2697	2.77e-05	0.000307272
Tarsl2	-0.570422	3.1428	2.78e-05	0.000308187
Smtn	-0.997866	2.11994	2.79e-05	0.000308326
Gm13237	-1.32734	3.18596	2.83e-05	0.000312679
A930007I19Rik	1.16333	0.99588	2.85e-05	0.000314543
Maml2	0.54516	3.91604	2.9e-05	0.000319647
Selenop	-0.563686	11.9782	2.93e-05	0.000322612
Wdr76	-0.593411	3.83039	2.94e-05	0.000323432
Carmil1	-0.868474	1.70086	2.96e-05	0.000325302
Fbxo5	-1.02672	3.08065	2.97e-05	0.000326084
Kifc1	-1.02325	3.58452	3.06e-05	0.000334587
Troap	-1.1969	1.62035	3.14e-05	0.00034273
Pbxip1	0.541361	3.9007	3.15e-05	0.000342796
Tspan7	1.03056	1.77622	3.25e-05	0.000353463
Cisd1	0.691994	4.1857	3.3e-05	0.000358653
Ahrr	0.837742	3.00468	3.32e-05	0.000359698
Dhcr24	0.634277	4.35272	3.37e-05	0.000364628
Tmem37	0.84746	3.99299	3.39e-05	0.000366527
Mis18a	-0.602038	3.50896	3.48e-05	0.000375051
Bora	-0.738093	2.55561	3.49e-05	0.00037573
Ankrd13d	-0.77815	2.2364	3.52e-05	0.000378156
Gm45627	0.721629	3.10397	3.55e-05	0.000381059
Clec4e	-1.28218	1.94584	3.57e-05	0.000383533
Gnat3	0.956554	1.40917	3.64e-05	0.000390145
Efcab11	-1.20694	1.37729	3.66e-05	0.000392011
Tmem267	1.66987	3.02151	3.72e-05	0.000396738
Hdac9	-1.20885	2.88376	3.73e-05	0.000397464
Kif2c	-1.02583	3.58631	3.75e-05	0.000398566
Kif14	-1.04353	3.00152	3.76e-05	0.000398872
Pola1	-0.688982	4.71062	3.8e-05	0.000403103
Tipin	-0.623256	3.52921	3.83e-05	0.000406539
Rabgap1l	-0.592169	3.9664	4.08e-05	0.000429492
Haus4	-0.635303	3.17297	4.16e-05	0.000436915
Map4k1	0.723329	2.60776	4.22e-05	0.000443019
E230032D23Rik	1.42452	0.505283	4.25e-05	0.000446027
Sgms2	0.627033	4.51186	4.31e-05	0.000451108
Frat1	-1.05842	1.23832	4.33e-05	0.000453177
Hirip3	-0.840001	3.18959	4.35e-05	0.000454571
Sorbs3	-0.678558	3.03636	4.52e-05	0.0004719
Tns2	-1.56746	0.262515	4.61e-05	0.000480727
Dusp16	-0.521864	3.44214	4.71e-05	0.000491026
Nemp1	-0.568588	3.67901	4.85e-05	0.000503205
Fam110c	0.902004	2.72335	4.98e-05	0.000515724
Osgin1	0.823489	3.19039	5.04e-05	0.000521323
Bcl7a	-0.782862	2.26414	5.22e-05	0.000538396
Mdm1	-0.814247	2.02418	5.27e-05	0.000541965
Dock3	0.959595	2.70795	5.49e-05	0.000563508
Zfp493	0.699001	2.42758	5.5e-05	0.000564033
Gen1	-0.878056	3.29152	5.74e-05	0.000585364
Kank2	-0.602274	3.14069	5.8e-05	0.000591441
Cenph	-0.89732	2.1615	5.83e-05	0.000593873
Tmem165	0.5875	7.68647	5.91e-05	0.000600473
Pola2	-0.584752	3.88655	6.08e-05	0.000615712
Bub1	-0.980403	4.20462	6.12e-05	0.000619243
Zbp1	0.789911	2.61944	6.13e-05	0.00061945
Myef2	-0.519406	4.52336	6.29e-05	0.000635122
Calhm6	-1.11589	1.38078	6.51e-05	0.000656944
Dusp2	0.947807	2.20127	6.52e-05	0.000656944
Armcx6	-1.24387	1.45257	6.54e-05	0.000659063
Spata13	-0.94774	1.54535	6.58e-05	0.000662047
Bmf	-0.792799	2.82178	6.6e-05	0.000663538
Adgre5	0.532019	7.13893	6.77e-05	0.000679327
Pank1	-0.565413	2.76148	7.02e-05	0.000702634
Mx1	-1.24628	2.39989	7.06e-05	0.000705646
Tube1	-1.03003	1.53635	7.09e-05	0.000708331
Cyp4f16	-0.596374	3.53551	7.22e-05	0.000720701
Pla2g6	0.595463	3.29525	7.51e-05	0.000747485
Ttc32	-0.695526	2.18109	7.65e-05	0.000760228
Ska1	-1.14371	1.38505	7.73e-05	0.0007668
Btbd19	0.675303	2.42619	7.89e-05	0.000781277
Kif18a	-1.03248	1.99124	8.03e-05	0.000793968
Iah1	0.528404	4.65965	8.06e-05	0.000795873
Ier5l	0.897645	2.75721	8.18e-05	0.000807766
Usp35	-0.651768	2.59085	8.36e-05	0.000823393
2900026A02Rik	-0.905118	2.73055	8.48e-05	0.000833861
Oasl2	-0.656815	5.44914	8.65e-05	0.000848286
Kdr	-0.897835	2.00498	8.69e-05	0.000850558
Pmf1	-0.592149	3.39449	8.81e-05	0.000861914
Slc9a5	-1.19676	0.967677	9.36e-05	0.000909634
Tcf19	-0.999499	2.61776	9.35e-05	0.000909634
Cdk2ap2	0.593791	4.33931	9.49e-05	0.000922127
Xndc1	-0.538374	2.90405	9.68e-05	0.000937367
Coro1a	-0.685922	6.44435	9.77e-05	0.000945139
Ska3	-1.07686	2.55755	9.88e-05	0.000954264
Rab27a	-0.82802	2.09517	9.87e-05	0.000954264
Plcb4	-1.19175	0.477674	0.000100784	0.000972377
Dbp	-0.644121	3.53192	0.000102433	0.000986806
Gm11879	0.982873	1.44429	0.000103831	0.000998039
Lst1	-0.549506	4.99466	0.000104029	0.000999193
Ccdc18	-1.17035	1.17231	0.00010533	0.00101018
Mapk11	-1.21255	0.866679	0.000105823	0.00101415
Socs2	1.46776	0.457171	0.000106698	0.00102178
Wdhd1	-0.523161	4.53033	0.000106914	0.00102309
Cxcl16	-0.553495	6.11055	0.000109945	0.00104975
Zfp467	-0.546789	3.68017	0.000110659	0.00105474
Pou3f1	1.25166	2.24134	0.000119939	0.00113756
Smagp	-0.563004	3.27354	0.000123164	0.00116386
Morc4	-0.983871	0.87927	0.000130617	0.00122544
Chek1	-0.931465	2.28394	0.000130895	0.001227
Gtse1	-0.737936	3.20891	0.000132676	0.00124189
Ube2t	-0.985597	2.23273	0.000135277	0.00126163
Rims3	0.891915	2.73726	0.000135189	0.00126163
Lilra6	-0.551098	2.94073	0.000138419	0.00128907
Sod3	3.46598	0.229047	0.000141585	0.00131475
Gm8989	2.51169	0.711119	0.000147595	0.00136465
Fancd2	-0.946847	2.89687	0.000147967	0.00136676
Platr25	-0.599675	3.11245	0.000150437	0.00138793
Spc24	-0.880029	2.02147	0.00015343	0.0014125
Mir99ahg	0.765875	2.55954	0.00015471	0.00142327
Fdft1	0.548406	4.10431	0.000155123	0.00142604
Mturn	-0.737652	2.59091	0.000155564	0.00142907
4933430I17Rik	0.958181	1.25787	0.000158395	0.00145404
A530064D06Rik	-0.768341	4.61202	0.000159449	0.00146267
Gm20412	0.878234	3.13354	0.000166171	0.00152325
Lilrb4a	-0.786112	9.04126	0.000167232	0.00152971
Fam102a	-0.602147	3.10592	0.000168345	0.0015377
Ebi3	-0.591958	3.84159	0.000168612	0.00153905
Pif1	-0.97497	1.66981	0.000169578	0.00154567
Plekhh2	-0.921966	2.1245	0.000171742	0.00156097
Gemin4	6.25488	0.799112	0.000175242	0.00159054
Pla2g15	0.501432	8.08711	0.000177008	0.00160543
Ccne2	-1.01685	4.0899	0.000177171	0.00160578
Cfh	-0.690123	4.77176	0.000182435	0.00164834
Dsn1	-0.668047	2.67095	0.000182508	0.00164834
Ksr1	0.565429	2.62781	0.000184459	0.00166479
Zmynd15	-1.02547	1.62249	0.000184945	0.001668
Shc4	-0.900112	1.47156	0.00018768	0.00169149
Smpdl3b	-1.27501	0.830738	0.00018877	0.0016988
Atp2a3	-0.915515	3.75295	0.00018902	0.0016988
Mtmr11	-1.26838	0.870892	0.000194613	0.0017442
Tnni2	-0.936218	1.52186	0.000195169	0.00174795
Wfs1	0.557836	5.02032	0.000195442	0.00174918
Rad51ap1	-0.939693	2.83989	0.000195819	0.00175134
Rnd2	0.69662	2.32934	0.000198055	0.00177011
Rpa2	-0.686794	3.68021	0.000198218	0.00177034
Kansl1l	-0.505406	3.6991	0.00020098	0.00179376
Mxd3	-1.58159	0.193987	0.000203777	0.00181346
Chaf1a	-0.56754	4.41306	0.000209125	0.00185743
Gm20605	-0.586707	4.55847	0.000212772	0.00188591
AC125351.1	-1.20931	1.03538	0.000214277	0.00189664
Rgs16	0.863692	2.20064	0.00021417	0.00189664
Oas1c	-0.922894	1.20333	0.000215995	0.00191053
Bco2	-1.06229	0.8306	0.000218078	0.00192022
Mgll	0.715957	7.56502	0.000219048	0.00192562
Exo1	-0.990899	2.26819	0.000220317	0.00193281
Ripk3	0.605828	3.87354	0.000222972	0.00195477
Dkk2	-1.3422	0.120577	0.000225178	0.00197276
Spns1	0.552199	5.05666	0.000229253	0.00200437
Lzts2	0.835907	2.06354	0.000229824	0.00200799
Atad5	-0.628109	3.46733	0.00023207	0.00202486
Cenpi	-0.838295	3.41646	0.000234233	0.00203958
Nrm	-0.711926	2.94712	0.00023677	0.0020575
Pask	-0.926165	2.00545	0.000241248	0.002095
Tle6	-0.655721	2.24958	0.000243686	0.00211189
Marveld1	-0.658658	2.37117	0.000245411	0.00212398
Syne2	-0.758161	3.08158	0.000246915	0.00213556
Aurkb	-0.848454	3.37951	0.000252928	0.00218316
Klra2	-1.68428	-0.0712927	0.000254456	0.00219488
Cdca5	-1.00297	2.55444	0.000256405	0.00220725
Cxcl2	-1.26712	0.165533	0.000260741	0.00223858
Cep78	-0.573584	2.5748	0.000263254	0.00225864
Gm42793	-0.896338	2.01572	0.000269315	0.0023045
Kifc5b	-1.52931	1.10241	0.000272041	0.00232627
Cela1	-0.57823	3.00659	0.000272874	0.00233185
Zfp229	-0.789922	1.72108	0.000276799	0.00236068
Pcgf2	-0.806228	2.01854	0.000280051	0.00238683
Magi3	-0.575146	2.85382	0.000296814	0.00252135
Pcdhgc3	-0.644961	4.75084	0.000299051	0.002537
BE692007	-0.607245	3.84559	0.000317795	0.00268186
Gm26588	1.3456	-0.0659219	0.000319508	0.00269455
2010001K21Rik	-1.07441	1.06254	0.000329595	0.00276873
Prag1	-0.674178	2.01049	0.000330093	0.0027711
Tnfsf10	-1.30011	-0.0210455	0.000330325	0.00277124
Lin9	-0.579513	3.82436	0.000334416	0.00280373
Filip1l	-0.7304	4.33858	0.00034034	0.00285154
9930111J21Rik2	-0.645304	7.21491	0.000343523	0.00287633
Dclk1	1.37424	1.58273	0.000347544	0.00290622
Abca1	-0.50486	9.70992	0.000348199	0.00290981
Cks2	-0.645815	2.70662	0.000351818	0.00293811
Nfkbie	-0.506695	2.65306	0.00035367	0.00294787
Camk2a	0.837616	1.67275	0.000361366	0.00300811
Parpbp	-0.812924	2.14279	0.000372772	0.00308707
Sfmbt2	0.789803	1.26446	0.000373064	0.0030875
Cdca8	-0.729578	4.04803	0.000376384	0.00311297
F2rl2	1.00315	0.777207	0.000377484	0.00311956
5830415G21Rik	1.23674	0.897544	0.000381995	0.00314926
Gm7334	1.25543	0.457275	0.000383121	0.00315651
Pdia5	0.886513	1.12323	0.000385798	0.0031745
Chml	-0.538185	3.8757	0.000386905	0.00318157
BC055324	-0.84622	2.05459	0.000387823	0.00318709
Tubb2b	-0.765778	1.87517	0.000391586	0.0032139
Cyp27a1	-0.529991	4.92221	0.000394166	0.00323302
Olr1	1.62928	-0.233376	0.000397583	0.00325896
Pim3	0.73609	2.66651	0.00039903	0.00326874
Gm42860	0.525058	7.06328	0.00039941	0.00326977
Trpc4	1.56764	-0.0912929	0.000404131	0.00330212
Cbx6	-0.854981	3.49031	0.000406574	0.00331786
Camsap3	-1.25245	0.0936973	0.000407726	0.00332316
Mid1	0.703137	5.78832	0.00040774	0.00332316
Tacc2	0.520221	3.78645	0.000413434	0.00336743
Mapk8ip1	1.0969	0.526651	0.000432445	0.00350453
Plk4	-0.706389	3.8091	0.000433516	0.00351099
AC130815.2	-0.969144	0.770661	0.000436229	0.00353074
Cbx7	-0.707399	2.4582	0.000442368	0.00357593
Tarbp2	0.502204	4.15091	0.000442988	0.00357868
Cmpk2	-0.810495	3.82515	0.000473194	0.00380588
Rogdi	-0.64121	2.38275	0.000474859	0.00381459
Nupr1	-0.789552	1.98422	0.000479419	0.00384642
Fanca	-0.707267	2.56458	0.0004845	0.00388476
Gm38166	0.616696	2.92598	0.000488738	0.0039163
Fkbp3	-0.51641	4.6405	0.000504456	0.00401722
Azin2	1.00349	1.16614	0.000506129	0.00402804
4930579G24Rik	-0.842156	2.39161	0.000524799	0.00416632
Treml4	-1.11797	1.09202	0.000525842	0.00417203
Gm16675	0.925296	0.7565	0.000526348	0.00417347
Selenoh	-0.802045	3.23294	0.000526724	0.00417387
Slc16a9	-0.709106	2.75691	0.000529586	0.00419397
Gm16712	-1.23035	0.418373	0.000530358	0.00419492
Ciita	1.17987	1.85768	0.000541353	0.00427925
Lysmd3	-0.564767	4.27374	0.00054278	0.00428789
Hyls1	-0.649162	2.25757	0.000547538	0.00432283
Gstm5	-0.965787	1.29875	0.000549091	0.00433243
Dab2	-0.620359	9.26918	0.000551165	0.00434346
Hipk2	0.506892	7.48473	0.000550829	0.00434346
Fam83d	-1.03047	1.13518	0.000552274	0.00434491
Nsl1	-0.572094	2.97083	0.000555724	0.00436602
Orc1	-0.909676	1.53846	0.000570566	0.00446353
Plxnb3	-0.922397	1.05046	0.000571002	0.00446423
Gm47640	-1.16285	0.238892	0.00057216	0.00446819
Amigo1	-0.743058	1.66715	0.000572203	0.00446819
Zgrf1	-0.74472	2.95063	0.000572841	0.00447045
Ap1s2	-0.538926	6.91866	0.000576056	0.00449282
Ifi30	0.695677	7.10577	0.000590066	0.00459095
Fyco1	0.582958	5.96723	0.000592106	0.00460403
Ctnnd2	-1.52284	0.273666	0.000594132	0.00461567
Cdc42bpg	-0.668612	2.11246	0.000604005	0.00467958
Ssx2ip	-0.620263	2.80214	0.000603931	0.00467958
Ddx11	-0.598581	2.98367	0.000622065	0.00480503
Susd3	-0.528969	3.76386	0.000627214	0.00483899
Gm42428	-1.20037	3.39746	0.00064108	0.00493117
Itpr3	-0.562057	4.41982	0.000643697	0.00494835
Gm47547	2.06345	-0.12491	0.000644819	0.00495401
Depdc1a	-0.986844	2.11751	0.000648561	0.00497682
Slc7a7	-0.512684	4.29165	0.000650926	0.00499199
Psd2	-1.14313	0.188239	0.000654689	0.00500684
Mcm8	-0.613574	2.64193	0.000654667	0.00500684
Pold1	-0.586111	3.5869	0.000653761	0.00500684
Ica1	-0.810033	1.54969	0.000669808	0.00510521
Gm46223	-2.70068	0.209706	0.000678864	0.00516314
Cpe	-0.717653	4.70248	0.000684717	0.00520458
Mybl1	-0.90615	2.28271	0.000697474	0.00528904
Gm5086	-0.60508	2.20284	0.000698415	0.00529306
Gm48493	-5.61347	-0.268088	0.000703906	0.00533153
Otud1	-0.516694	3.12047	0.000717672	0.0054294
Tyms	-0.626135	3.19888	0.000718443	0.00543141
Il4i1	1.24525	1.04169	0.000723155	0.00545804
Gm3325	-0.982163	1.45521	0.000753296	0.00566626
Bmp2	-0.918609	1.60427	0.000755879	0.00568168
Gprc5c	0.657109	4.469	0.000770592	0.00577877
Trf	0.584765	9.78575	0.000772166	0.00578382
Smc4	-0.527026	6.57493	0.000793096	0.00593369
Pecam1	0.791991	1.86432	0.000812933	0.00605743
Ccl2	1.07966	4.79154	0.000827477	0.00615155
Syce2	-0.568609	2.80368	0.000831064	0.00616766
H2afy2	0.82201	1.3622	0.000831083	0.00616766
Ighm	-1.21309	3.96663	0.000834781	0.00618525
Pacrg	0.511482	2.56741	0.000853555	0.00630171
Mfge8	0.695564	9.19032	0.000866581	0.00638688
Snta1	-0.713342	2.41594	0.000874144	0.00643524
1700025G04Rik	-0.657368	3.01835	0.000886382	0.00651415
Rpl19-ps11	-4.16586	4.31162	0.000888985	0.00652698
Trim45	-0.787125	1.3148	0.000898008	0.00657704
Rasgrp2	-0.610634	2.9841	0.000910152	0.00665917
Ccdc28a	-0.549548	2.50936	0.000925591	0.00676365
Igsf3	1.91846	-0.0501766	0.000937961	0.00683462
Ccbe1	0.587401	2.60553	0.000944566	0.00687497
4931440P22Rik	-0.627092	2.19209	0.000952299	0.00692733
Tm4sf5	-1.25862	-0.0222265	0.00095548	0.00694654
Lrr1	-0.977242	1.17092	0.000996954	0.0072195
Rac3	-0.864185	1.22305	0.000999865	0.0072365
Ttc39a	-0.941857	1.04012	0.00100181	0.00724556
Lyzl4	0.986069	1.42885	0.00100641	0.0072716
Bmp7	1.80255	-0.128722	0.00104173	0.00750568
Gm26920	-5.21468	-0.342007	0.0010693	0.00769084
Lpar2	-1.01324	0.321848	0.00107101	0.00769084
Prrg1	0.729984	3.02332	0.00108048	0.00775018
Cd86	-0.605178	3.18516	0.00109038	0.00779512
2900089D17Rik	0.583983	2.82597	0.00109217	0.00780358
Cenpl	-0.648636	2.75781	0.00110925	0.00791681
Cib2	0.903319	2.0585	0.00111323	0.00794081
Gm37390	-0.979355	1.06078	0.00111485	0.00794791
Insl6	0.665767	2.48043	0.00111922	0.00797469
Hspb6	-0.93226	1.47761	0.00112247	0.00799343
BC030867	-0.974337	1.77156	0.00117945	0.00833917
Serpinb1b	1.02409	0.592857	0.00118706	0.00838372
Timeless	-0.645529	3.23545	0.00120943	0.00852298
Tnfrsf8	0.913815	0.743697	0.0012164	0.00855803
St8sia4	0.537275	6.74298	0.00122176	0.00857885
Ubtd2	0.785554	1.3243	0.00122172	0.00857885
Sap25	-1.02223	1.93625	0.00124789	0.00874135
Pkd1l2	-1.09202	0.522346	0.00125827	0.00880923
Atp1b3	0.536982	9.0828	0.00128381	0.00896075
Cmah	-0.755743	3.02012	0.00130851	0.00909663
Svep1	1.63101	0.380231	0.00133306	0.00923734
C130050O18Rik	-0.843408	1.31737	0.00134381	0.00929682
A930004J17Rik	-0.65292	1.95435	0.0013547	0.00936204
Dynlt1f	-0.618459	4.60678	0.00137279	0.00946168
Nlrp1c-ps	-0.666478	2.59115	0.00137605	0.00947907
Gm17251	-0.803094	1.00744	0.00138526	0.0095374
Blm	-0.535276	3.36727	0.00139053	0.00956851
Tmem191c	-0.966371	0.643191	0.00143918	0.00987687
Pck2	-0.55878	4.67498	0.00145473	0.0099783
Iqck	0.938007	0.657088	0.00145636	0.00997999
Ldlrad4	0.620379	2.09967	0.0014616	0.0100094
Gm45410	0.990707	1.01617	0.00146396	0.0100202
Polq	-0.679819	3.02122	0.00146752	0.0100339
2510002D24Rik	-0.783708	1.38018	0.00151671	0.0103263
Ptpn3	0.791977	1.27988	0.00152648	0.0103599
Ccne1	-0.637384	3.04703	0.00152993	0.0103778
Gm13710	-0.926138	2.29611	0.00153351	0.0103857
Ifi213	-1.52885	0.855205	0.00154442	0.0104486
Zc3hav1l	-0.784586	1.67713	0.00154791	0.0104667
Cysltr1	-0.586908	3.42127	0.0015532	0.0104914
Haspin	-0.523517	2.81738	0.00155605	0.0104997
Slc2a3	-0.581064	2.35676	0.00156365	0.0105454
Ak4	0.752986	1.4794	0.00158397	0.0106585
Klhl23	-0.85353	1.31195	0.00159047	0.0106879
Dbf4	-0.532146	4.38212	0.00160274	0.0107414
Rab39	-1.27881	0.151796	0.00161361	0.010803
Oas3	-0.715804	4.16287	0.00161495	0.0108064
Patj	1.11478	0.152775	0.00164855	0.0109855
Marco	-1.11561	1.03154	0.00165887	0.011045
Cks1b	-0.592422	3.3702	0.00166874	0.0110971
Gm43900	1.45319	0.178415	0.0017176	0.011369
Stk26	-0.899715	0.779172	0.00172888	0.0114378
Miga2	0.576343	2.89879	0.00173904	0.0114874
Ebf1	1.89536	0.00976765	0.00173905	0.0114874
Gm15513	-0.659618	2.32997	0.00175744	0.0115791
Igsf9	-1.0036	0.305039	0.00188156	0.0123337
Chaf1b	-0.506999	3.73699	0.0018904	0.012379
Atg16l2	-0.509039	2.76894	0.00190099	0.0124357
Gm29666	1.0003	1.12715	0.00191159	0.0124987
Tst	0.699279	1.9538	0.00192687	0.0125863
Aunip	-0.915382	1.02414	0.00197145	0.0128107
Arl5c	-0.52284	3.57481	0.00200588	0.0129963
Dclk2	-1.13386	0.244008	0.00201079	0.013015
Tcea2	-1.0815	0.220175	0.0020323	0.0131146
Abca8b	-0.768964	1.76745	0.00203209	0.0131146
Gm37625	-0.904581	1.03906	0.00206282	0.013265
Inka2	0.529775	2.73297	0.00216675	0.0138571
Ass1	0.575465	2.6284	0.0022083	0.0140669
Ap1s3	0.530189	3.49588	0.00221076	0.0140756
Ddias	-0.642192	2.49614	0.00222434	0.014155
Hspa1a	1.08264	1.16175	0.00226188	0.0143726
Zfp658	-0.803289	1.2587	0.00227477	0.0144473
Pex16	0.536923	2.99875	0.00232113	0.0147127
Cx3cl1	-1.36336	0.145164	0.00234402	0.0148212
Cchcr1	-0.808371	1.49644	0.00239195	0.0150632
Gm48274	-0.84748	3.25422	0.0023977	0.0150814
Gm28424	1.20325	-0.104709	0.00241826	0.0151713
Per3	-0.603364	2.12639	0.00243837	0.0152838
Ccnf	-0.5282	4.03771	0.00249162	0.0155733
Gm37917	0.713498	3.0232	0.00249202	0.0155733
Gm5141	-0.812561	1.76851	0.00251006	0.0156771
Gins3	-0.59465	2.29779	0.00259661	0.0161127
Ccr1l1	-1.0313	0.151976	0.00260013	0.016121
4930555A03Rik	-0.817875	1.13324	0.00260326	0.0161274
Dhrs13	-0.936305	0.852642	0.00261009	0.016162
Gm45449	-0.721153	1.42125	0.00261418	0.0161717
Cenpm	-1.04701	0.729787	0.00262491	0.0162303
Sapcd2	-1.28288	0.143348	0.00264571	0.0163432
Gm42959	0.819201	2.63893	0.00267273	0.0164942
Pdlim1	1.26416	0.753406	0.00270698	0.0166736
Cd81	-0.703178	5.48765	0.0027305	0.016806
Ccnd1	-0.537473	7.75527	0.00273503	0.0168222
Ddah1	3.85647	0.0375469	0.00273972	0.0168349
Cdkn3	-0.871636	1.87078	0.00277262	0.0170127
Gm8181	5.07604	-0.0771166	0.00279026	0.0170883
Gm4739	-0.791102	2.99197	0.00281419	0.0172103
Rhod	-0.740794	1.49727	0.00283062	0.01728
Olfr420	1.55647	0.19528	0.00283077	0.01728
Chtf18	-0.754983	1.9838	0.00290406	0.0176843
Ehhadh	-0.897924	0.600721	0.00292726	0.0178086
Phf11c	-0.900645	0.614712	0.00293299	0.0178274
2700099C18Rik	-0.776982	1.72965	0.00297218	0.0180222
Vdr	1.9366	-0.298865	0.0030212	0.0182507
Gm49368	1.09508	0.858103	0.00303519	0.018318
Bmyc	-0.584291	1.86458	0.00304057	0.0183419
Mreg	0.948889	0.547047	0.00304805	0.0183783
Stat4	-1.26932	0.510695	0.00305601	0.0184177
Ctu2	0.501202	3.21426	0.00306483	0.0184602
Syt8	-0.987502	1.15913	0.00307681	0.018491
Lzts3	-0.774241	1.67759	0.0030761	0.018491
Gm43535	0.693726	2.53421	0.00316395	0.0189263
Rap1gap	-1.28058	0.223267	0.00317383	0.0189678
Zcwpw1	-0.729013	1.43072	0.00320124	0.0191049
Gm48040	-1.36735	-0.0787232	0.00321231	0.0191621
Cep72	-0.577583	1.86916	0.00321719	0.0191734
Celf4	1.08855	1.15067	0.00323991	0.019291
9930012K11Rik	-0.920244	0.638657	0.00331388	0.0196677
Ly75	0.957854	2.01299	0.00334888	0.0198571
Gm47761	-0.953237	2.81224	0.00336279	0.0199212
Zfp934	-0.68547	2.77144	0.0033772	0.0199973
Rapsn	-0.986244	0.686289	0.00337978	0.0200034
Srgap3	-0.72587	1.31262	0.0034017	0.0200777
Rtkn	0.8898	1.2659	0.0036858	0.021498
Rfc4	-0.642062	2.56861	0.00373103	0.021693
Rmi2	0.948919	0.608716	0.00372997	0.021693
Dcstamp	0.852357	2.79559	0.00381298	0.0220796
Msrb2	-0.554989	2.04864	0.00400875	0.0230988
Nemp2	-0.582857	1.80412	0.00407066	0.0234136
Gm4366	3.49778	2.2643	0.0040705	0.0234136
Zc3h8	-0.704755	1.74755	0.00413346	0.0237535
Cd74	0.919977	7.24472	0.00425527	0.0243231
Gpr19	-0.852157	0.919721	0.00435252	0.0248128
Cd4	-0.654183	4.56581	0.00435461	0.0248137
Tmem150b	-0.757289	1.31727	0.00435941	0.0248191
Sirpb1b	-0.817654	1.90158	0.00437476	0.0248578
Zc3h6	-0.549011	2.33815	0.00437539	0.0248578
Suv39h2	-0.671842	1.83774	0.00438437	0.0248951
Ccdc15	-0.875729	0.594638	0.00441483	0.025057
Olfr767	-1.32354	0.195343	0.00448374	0.025392
Cuedc1	-0.577358	1.96191	0.00449982	0.0254607
Plxna4os1	-0.760463	1.35712	0.00451349	0.0255044
P2ry12	-1.02821	0.949187	0.00452442	0.0255213
Hist2h3c2	0.849568	1.05778	0.00453037	0.0255437
Gpr68	0.666953	1.32088	0.00456909	0.0257281
Pla2g2e	0.813835	1.01897	0.00472552	0.0263963
Cdc42ep2	0.653981	2.09987	0.0048927	0.0271228
Gm47567	0.806005	1.39823	0.0049257	0.0272456
Gm31805	1.06379	0.642652	0.00506746	0.0279231
AI839979	-0.659408	1.85592	0.00508494	0.0280074
Iigp1	-1.34034	0.865832	0.00517988	0.0284816
Smpd5	-0.967488	0.285202	0.00520126	0.0285625
Gm31718	-0.725885	0.957934	0.00519978	0.0285625
Gm20632	0.573253	2.29508	0.00519844	0.0285625
Krt80	-0.908777	0.697182	0.00523889	0.0287201
Dusp13	0.815405	0.522919	0.0053933	0.0294661
Proser3	-0.665884	1.32469	0.00544336	0.0297143
Met	0.636256	3.21594	0.0054749	0.0298706
Myom1	-0.779256	1.40553	0.00548742	0.0298914
Wdr90	-0.606348	2.04898	0.00551737	0.0300038
Gm42047	-0.926547	5.40406	0.00552069	0.0300091
Gm21961	1.66736	0.509561	0.00552947	0.0300442
AC139131.1	-0.678137	1.69868	0.00558448	0.0302791
AC173344.1	-1.06373	0.284212	0.00562862	0.0304727
Nptxr	-0.649266	2.22054	0.00580994	0.031343
Tgtp2	-1.30667	1.48599	0.00587365	0.0316203
Palm	-0.600817	1.66202	0.00586663	0.0316203
Rsad2	-0.566194	5.47171	0.0058718	0.0316203
Kcnj16	0.745514	1.18289	0.00587778	0.0316293
Gm37082	1.36007	1.01744	0.00595764	0.0320055
Inpp4b	-1.1088	0.892937	0.00596879	0.0320144
Zfand4	-0.675449	1.32279	0.00596878	0.0320144
Dscc1	-0.903377	0.97084	0.00607696	0.0325107
Gm37726	1.13114	0.126001	0.00615007	0.0328336
Nek8	-0.684794	0.82236	0.0061711	0.0329
Hist1h2ap	-0.849652	2.55857	0.00624527	0.0332177
Alyref2	-0.580608	1.8951	0.00626306	0.0332985
Fam216a	-0.572629	2.19963	0.00628709	0.0333987
Gm40264	1.06796	1.2069	0.00629707	0.0334241
Atl1	-0.583017	1.68866	0.00630155	0.0334341
Lrrc1	0.930092	0.457373	0.00638827	0.0338244
Hmgn3	-0.660176	1.90372	0.00646681	0.034184
Spaca6	-1.0371	0.445008	0.00652744	0.0344761
Nsg1	-1.46933	0.221143	0.00658667	0.0347035
Ctgf	-0.698085	3.55425	0.00665489	0.0348865
Spic	-0.596105	2.96325	0.0066531	0.0348865
Ddb2	-0.604543	1.55315	0.00666263	0.0349035
Nup210	-0.578413	2.07534	0.00669181	0.0350421
Gm7160	0.714771	1.05584	0.006716	0.0351544
Zdhhc2	-0.862468	1.44431	0.00673683	0.0352492
Thbs2	-2.09993	0.410549	0.00692595	0.0360772
Cers4	-0.781686	1.05852	0.0071876	0.0371991
Trp53cor1	-0.725031	1.16585	0.00728769	0.0376111
Gm21742	1.12042	0.328561	0.00749124	0.0384918
Qpct	-0.502569	4.00287	0.0075457	0.0387406
Cysltr2	0.698127	1.27136	0.0075647	0.0388072
Slco2b1	0.602524	5.17876	0.00757807	0.03884
Sbk2	1.3213	0.0673761	0.00770878	0.0393579
Spry3	-0.867721	0.586847	0.00772572	0.0394288
Ppp1r1a	0.972419	0.0709158	0.00779591	0.0397082
Mettl27	0.578868	2.37412	0.00798976	0.040551
Tedc1	-0.776283	1.90892	0.00801214	0.0406325
Tspoap1	-0.527636	2.16398	0.00802981	0.0407061
Zbtb8a	-0.653761	1.48814	0.00807699	0.0408808
Rgs11	-0.949299	0.0423524	0.00812903	0.0410634
Gm15726	0.911951	1.90682	0.00816489	0.0411771
Gins1	-0.508702	2.24351	0.00829377	0.0416502
Rap1gap2	-0.706202	1.07241	0.00831184	0.0417246
2310009B15Rik	0.631614	1.3846	0.0085126	0.0425498
Axl	-0.778829	5.85166	0.00853653	0.0426197
6720489N17Rik	-0.709401	1.86505	0.00855376	0.0426891
Plppr2	-0.959534	0.241169	0.00856992	0.0427369
Gm37168	0.530721	2.25787	0.0086471	0.0430214
Kif1a	0.546429	2.79603	0.00865989	0.0430684
Lrig1	-0.639527	0.969461	0.00867536	0.043112
Gm4070	0.605909	6.6833	0.0088357	0.0437813
Chd5	1.19431	-0.0616664	0.00889658	0.0439734
G530011O06Rik	0.70297	4.10143	0.00892858	0.0440977
Lockd	-0.838197	1.04065	0.00899738	0.0443694
Kifc2	-0.765838	0.884526	0.00901943	0.0444439
Ggnbp1	-1.08466	0.418194	0.00904244	0.0445197
Eef1akmt4	0.529423	2.54141	0.00922215	0.0453284
Gm14401	-1.29162	-0.135475	0.00951065	0.046579
Rab15	1.01688	-0.0113505	0.00951611	0.046588
9430025C20Rik	-0.873444	0.461713	0.00978088	0.0477415
Col15a1	-0.849524	0.399644	0.00979375	0.0477473
Naprt	-0.728216	1.13724	0.00984688	0.04797
Zfp607b	0.74805	0.955281	0.00986552	0.0480244
Fam83f	0.507107	4.14935	0.00990495	0.0481981
B230303O12Rik	-0.93792	0.178346	0.00993881	0.0483446
9330182L06Rik	-0.871287	0.620117	0.0102311	0.0495599
Pram1	-1.7838	0.803955	0.0103058	0.0498349
Gm13963	1.08045	0.269529	0.0103041	0.0498349
Hey1	0.685051	2.01093	0.0105765	0.0508024
Gm42688	-0.502254	2.02607	0.0106225	0.0509949
Hectd2os	0.834961	1.44697	0.0106803	0.0512535
Gm26811	0.746643	1.47471	0.0107553	0.0514789
Per2	0.629223	1.63756	0.0107937	0.0515858
Epor	-0.967801	0.577483	0.0109813	0.0524048
Ifi44	-1.25934	0.655483	0.0109945	0.0524482
Gm44709	-3.76192	-0.434942	0.0112145	0.0532213
Cenpp	-0.804821	0.908617	0.0112327	0.0532634
Fndc7	1.04405	0.118794	0.0112855	0.0533659
Pex11g	0.959428	1.07389	0.0114825	0.0540937

## Sheet: Suppl Table 4
Supplementary Table 3. MK2 WT M0 macrophages vs MK2 KO M0 macrophages
	logFC	logCPM	PValue	FDR
4930402H24Rik	-1.66984	6.61202	5.81e-105	7.47e-101
Wdfy1	2.0027	5.10257	1.38e-81	8.85e-78
Col4a1	-2.76328	3.14464	2.91e-79	1.25e-75
Ctgf	-3.5604	3.55425	3.12e-75	1e-71
Sparc	-3.26587	3.58869	1.63e-74	4.2e-71
Gm42429	-7.47059	3.78198	3.39e-74	7.26e-71
Col5a2	-3.38443	3.36849	2.57e-69	4.72e-66
Serpine1	-3.41366	4.21846	2.59e-65	4.16e-62
Bgn	-3.60442	3.87792	1.95e-64	2.78e-61
Col12a1	-4.06738	3.49975	3.06e-63	3.93e-60
Cyr61	-3.85365	2.40143	6.35e-61	7.42e-58
Acta2	-3.38079	3.67585	2.17e-58	2.33e-55
Tnc	-3.76663	3.19644	4.74e-58	4.69e-55
Aebp1	-3.71703	2.67707	3.33e-57	3.06e-54
Hspg2	-3.38446	2.44379	2.15e-51	1.84e-48
Fat1	-3.39798	2.90095	3.79e-51	3.04e-48
Fstl1	-2.6898	3.00564	6e-50	4.54e-47
Nedd4	-2.20301	3.7808	3.52e-48	2.51e-45
Loxl2	-3.67095	2.58273	8.82e-48	5.97e-45
Cyp1b1	-3.54049	3.46277	5.9e-47	3.79e-44
Fbn1	-3.35877	2.33594	8.1e-46	4.96e-43
Col3a1	-3.79464	1.63637	1.39e-42	8.11e-40
Serpinh1	-3.21408	2.42114	4.97e-42	2.78e-39
Lox	-3.26906	4.40795	5.43e-41	2.91e-38
Cxcl12	-4.72746	1.90757	1.71e-40	8.78e-38
Cald1	-3.16224	4.0263	1.38e-39	6.81e-37
Col1a2	-3.83369	3.98004	3.26e-38	1.55e-35
Igfbp7	-3.06656	1.72368	5.82e-38	2.67e-35
Col6a2	-3.93092	1.62935	8.32e-38	3.69e-35
Antxr1	-2.83177	1.75655	1.17e-36	5.03e-34
Ltbp2	-3.21954	2.13822	1.17e-34	4.84e-32
Lamb1	-3.29803	1.95924	1.86e-34	7.47e-32
Tagln	-2.97183	2.73453	1.98e-34	7.71e-32
Dcn	-4.24496	1.72712	3.31e-34	1.25e-31
Nid1	-2.99817	2.55412	4.6e-34	1.69e-31
Vgll3	-4.36452	1.32261	3.37e-32	1.17e-29
Dclk1	-3.59234	1.58273	3.28e-32	1.17e-29
Col4a2	-2.59626	2.37094	3.58e-32	1.21e-29
Col6a1	-3.20147	2.14588	4.03e-31	1.33e-28
Myl9	-3.7372	0.993073	9.31e-31	2.99e-28
Col1a1	-3.67728	3.37215	1.22e-30	3.82e-28
Mapkapk2	-1.01338	6.45958	1.66e-30	5.07e-28
Fbln2	-3.78152	1.87781	3.44e-29	1.03e-26
Ddr2	-3.54147	1.52131	3.51e-29	1.03e-26
Tead1	-3.35377	1.50087	5.12e-29	1.46e-26
Csf1	-2.05944	4.7116	1.08e-28	3.03e-26
Cdkn1c	1.37481	4.7397	4.08e-27	1.12e-24
Cemip	-3.04003	1.49287	4.57e-27	1.23e-24
Gm42031	-1.91076	6.47819	1.51e-26	3.97e-24
Lama4	-4.38371	0.701202	4.45e-26	1.14e-23
Dpysl3	-3.82152	1.08557	2.69e-25	6.79e-23
Cdh11	-3.38518	2.35008	1.22e-24	3.01e-22
Ptx3	-3.93724	0.857672	2.04e-24	4.94e-22
Prrx1	-2.98731	1.77054	2.44e-24	5.81e-22
Enah	-2.67953	1.833	2.98e-24	6.98e-22
Tpm2	-2.75803	1.80237	4.36e-24	1e-21
Pdgfra	-3.82496	1.07482	4.52e-24	1.02e-21
Grem1	-3.36881	3.47005	6.72e-24	1.49e-21
Gm42427	-1.57577	7.67532	3.31e-23	7.21e-21
Col6a3	-2.67509	1.88554	6.37e-23	1.36e-20
Ehd2	-3.09384	0.985467	2.17e-22	4.57e-20
Cdh2	-3.23738	0.97824	2.26e-22	4.65e-20
Col8a1	-3.18529	1.67837	2.28e-22	4.65e-20
Gm26880	-1.40269	5.47635	1.6e-21	3.21e-19
Ddah1	-7.18388	0.0375469	1.64e-21	3.24e-19
Serpinb2	-4.15563	0.700973	2.29e-21	4.47e-19
Inhba	-2.92751	2.00546	3.14e-21	6.03e-19
Grb10	-3.32381	1.05593	4.4e-21	8.33e-19
Phldb2	-3.11589	0.762953	6.25e-21	1.17e-18
Pdgfrb	-3.38299	0.807059	6.89e-21	1.27e-18
Mrc2	-3.46667	0.577013	2.84e-20	5.15e-18
Prss23	-3.41674	0.189827	2.88e-20	5.15e-18
Col5a1	-2.7968	1.75846	4.3e-20	7.57e-18
Cnn3	-2.41944	1.40775	5.06e-20	8.8e-18
Sema7a	-3.0971	0.821372	5.56e-20	9.54e-18
Fkbp10	-4.03486	0.355136	6.42e-20	1.09e-17
Vcan	-2.32301	1.58533	1.17e-19	1.96e-17
Timp1	-3.06046	1.71491	2.05e-19	3.39e-17
Fgf7	-4.60061	0.367382	2.33e-19	3.79e-17
Kirrel	-3.28424	0.883484	3.36e-19	5.4e-17
Fn1	-2.2659	7.21052	4.33e-19	6.88e-17
Ptpn14	-3.41305	0.751268	5.45e-19	8.54e-17
Cttn	-1.1663	3.89635	5.11e-18	7.93e-16
Tnip3	0.981665	5.08363	6.94e-18	1.06e-15
Fermt2	-2.98927	1.14783	7.48e-18	1.13e-15
Ccdc80	-2.88042	1.03624	8e-18	1.2e-15
Postn	-2.16225	2.10228	8.53e-18	1.26e-15
Enpp2	-3.31427	0.811514	1.42e-17	2.08e-15
Mylk	-2.29525	1.02403	3.43e-17	4.96e-15
Osmr	-3.19856	0.666859	4.68e-17	6.68e-15
Thbs2	-3.24307	0.410549	4.77e-17	6.74e-15
Slit2	-3.31547	0.567739	1.49e-16	2.09e-14
Pdk4	-2.91992	0.749849	2.52e-16	3.48e-14
Bmp1	-2.70241	1.05658	3.37e-16	4.62e-14
Gm48274	-2.07044	3.25422	5.05e-16	6.83e-14
Amotl2	-2.97866	0.594867	6.25e-16	8.37e-14
Errfi1	-1.04384	3.18452	1.03e-15	1.37e-13
Parva	-2.39658	1.21618	2.28e-15	2.99e-13
Mxra8	-3.1671	0.298142	4.9e-15	6.36e-13
Adamts2	-2.78728	0.429547	5.01e-15	6.44e-13
Ptprg	-3.73719	0.0641374	7.1e-15	9.05e-13
Loxl1	-3.56018	0.38689	9.81e-15	1.24e-12
Serpinf1	-3.05741	0.62419	1.66e-14	2.08e-12
Lhfp	-2.8468	0.829651	2.12e-14	2.62e-12
Thbs1	-2.35599	8.28412	3.58e-14	4.38e-12
3110039I08Rik	-2.68975	0.873566	4e-14	4.86e-12
Sulf1	-2.72176	0.589995	4.09e-14	4.91e-12
Akap12	-2.5153	0.754014	7.01e-14	8.34e-12
Epas1	-2.21223	5.20823	8.46e-14	9.98e-12
Timp3	-1.85937	1.78462	1.16e-13	1.36e-11
Scd2	-1.00231	7.01697	1.29e-13	1.49e-11
Nfib	-3.35124	0.183658	1.38e-13	1.59e-11
Rbfox2	-1.55362	1.61402	1.65e-13	1.88e-11
S1pr3	-4.17269	0.520629	2.06e-13	2.32e-11
Bicc1	-3.44027	-0.101604	2.2e-13	2.46e-11
Gpx8	-3.52908	-0.218457	8.86e-13	9.77e-11
Pxdn	-2.90378	0.166541	8.89e-13	9.77e-11
Neo1	-1.45763	2.40619	9.59e-13	1.05e-10
Mmp27	-0.674582	5.15435	1.07e-12	1.16e-10
Ghr	-2.70243	0.143858	2.28e-12	2.44e-10
Dbn1	-3.85486	-0.262367	2.62e-12	2.79e-10
Ptk7	-3.18494	-0.0989429	2.71e-12	2.85e-10
Actg2	-3.21302	-0.295413	2.75e-12	2.87e-10
Adgrf5	-3.118	0.28373	4.08e-12	4.24e-10
Map1b	-2.33204	0.593646	4.35e-12	4.47e-10
Tjp1	-2.68309	0.458578	4.82e-12	4.91e-10
Sod3	-4.89257	0.229047	4.93e-12	5e-10
Yap1	-2.53823	0.484175	6.21e-12	6.23e-10
Dlc1	-1.91688	0.958261	9.8e-12	9.77e-10
Ccl8	-2.73037	2.23883	1.02e-11	1.01e-09
Fhl2	-3.51556	-0.198228	1.44e-11	1.41e-09
Fat4	-3.41789	0.468466	1.84e-11	1.79e-09
Bcar1	-3.1165	0.0435185	2.28e-11	2.2e-09
Gpc4	-3.36346	0.0112125	3.65e-11	3.5e-09
Efnb2	-2.19889	0.197254	1.03e-10	9.78e-09
Ebf1	-3.29262	0.00976765	1.25e-10	1.17e-08
Map4k4	-0.662798	7.36843	1.24e-10	1.17e-08
Kif1a	-1.28838	2.79603	1.76e-10	1.64e-08
Pbxip1	-0.808028	3.9007	2.2e-10	2.03e-08
Fzd1	-1.25337	2.7519	2.42e-10	2.23e-08
Ptprd	-3.06732	0.133644	3.33e-10	3.03e-08
Ptgfrn	-0.806331	4.43532	3.77e-10	3.41e-08
Vwf	0.695359	6.94403	4.46e-10	4.01e-08
Tbx15	-3.16124	-0.224142	5.49e-10	4.9e-08
Snai2	-3.45705	-0.0447453	5.87e-10	5.21e-08
Slco2a1	-3.21597	-0.241308	7.74e-10	6.82e-08
Ncam1	-2.29017	0.268735	8.57e-10	7.5e-08
St3gal5	0.959954	4.33144	9.55e-10	8.3e-08
Lurap1l	-3.06337	-0.268425	1.12e-09	9.68e-08
Msrb3	-2.26758	0.263218	1.17e-09	1.01e-07
Htra1	-1.23518	2.18035	1.58e-09	1.34e-07
Pcdh19	-3.75431	-0.257531	1.7e-09	1.43e-07
Ogn	-3.58751	-0.206507	1.82e-09	1.53e-07
Adm	-2.72426	-0.125661	2.24e-09	1.87e-07
Arhgef17	-1.78732	0.597001	2.59e-09	2.15e-07
Apoe	-0.900107	11.9102	3.17e-09	2.61e-07
Inhbb	-3.22537	-0.357105	4.11e-09	3.37e-07
Serping1	-2.22982	0.75208	4.17e-09	3.4e-07
Plod2	-1.50027	1.78572	5.14e-09	4.16e-07
Wwtr1	-2.74241	-0.15989	5.3e-09	4.26e-07
Tgfb2	-2.39079	0.13075	6.1e-09	4.88e-07
Lsp1	1.06101	4.76678	6.81e-09	5.4e-07
Dcstamp	1.85648	2.79559	7.73e-09	6.1e-07
Fscn1	-1.54326	1.66307	1.08e-08	8.39e-07
Syt13	-2.02353	0.357683	1.12e-08	8.67e-07
Ptgs2	-2.20424	-0.0181096	1.24e-08	9.58e-07
Dio2	0.687631	5.85727	1.27e-08	9.71e-07
Gm2115	-2.47327	0.115115	1.55e-08	1.18e-06
Egfr	-1.56104	0.851848	1.61e-08	1.22e-06
Tm4sf1	-2.34956	0.0246344	2.02e-08	1.52e-06
Il1a	-1.25788	2.42619	2.05e-08	1.53e-06
Cd22	-0.849311	4.54386	2.38e-08	1.77e-06
Pcdh1	-2.51234	-0.303562	2.56e-08	1.9e-06
Arhgap29	-2.08298	0.819146	3.08e-08	2.25e-06
Fkbp9	-0.612045	4.49384	3.1e-08	2.25e-06
Tgfb3	-2.46399	0.145024	4.06e-08	2.93e-06
Cnrip1	-0.546357	6.36892	4.47e-08	3.21e-06
Mpp7	-1.67404	2.58852	4.58e-08	3.27e-06
Ccr3	0.701181	5.90077	5.22e-08	3.71e-06
Mmp2	-1.70471	0.683565	5.41e-08	3.82e-06
Epb41l3	-1.71665	3.45973	5.65e-08	3.97e-06
Ighg2b	-3.52166	0.0631055	5.78e-08	4.04e-06
Kif26b	-2.66542	-0.429491	6.17e-08	4.29e-06
Wfs1	-0.807068	5.02032	6.7e-08	4.63e-06
Lif	-2.69059	-0.111831	8.22e-08	5.65e-06
Robo1	-2.82419	-0.199734	8.34e-08	5.71e-06
Fcgr2b	-1.03896	8.4764	9.22e-08	6.27e-06
Zfp532	-0.955117	2.53438	1.02e-07	6.87e-06
Tgfb1i1	-1.84259	0.492547	1.03e-07	6.93e-06
Mmp8	-0.847763	4.88017	1.18e-07	7.92e-06
Farp1	-1.80628	0.602113	1.21e-07	8.08e-06
Gm43305	-0.841952	8.38595	1.3e-07	8.62e-06
Sdc2	-2.15975	1.09904	1.58e-07	1.04e-05
Cadm1	-1.6836	7.64211	1.61e-07	1.06e-05
Gm15975	-9.0385	1.4018	1.68e-07	1.09e-05
Adamts5	-2.82322	-0.0897397	1.66e-07	1.09e-05
Epha2	-2.14104	-0.0982965	1.9e-07	1.23e-05
Gm21188	-0.589767	6.39084	1.96e-07	1.26e-05
Npy	0.789052	5.54831	1.98e-07	1.27e-05
Scube3	-2.10606	0.328069	2.03e-07	1.29e-05
Adam19	-1.87069	4.69881	2.31e-07	1.47e-05
Mmp14	-1.13586	5.20938	2.55e-07	1.61e-05
Ryk	-0.982384	2.08457	2.65e-07	1.66e-05
Vdr	-2.80184	-0.298865	3.03e-07	1.89e-05
Tnf	0.657992	3.23439	3.59e-07	2.23e-05
Fbxo32	-1.37167	4.84742	3.62e-07	2.24e-05
Gm4316	-0.814294	5.60803	4.32e-07	2.66e-05
Cacna1b	1.16586	2.07005	4.54e-07	2.78e-05
BC021767	-1.98105	0.934083	4.62e-07	2.81e-05
Tox2	1.12186	3.79781	5.56e-07	3.35e-05
Pdgfc	-0.725145	5.07048	5.85e-07	3.52e-05
Adgra2	-1.4582	0.547096	6.38e-07	3.82e-05
Htr1b	-1.98246	1.31377	6.56e-07	3.91e-05
Eml1	-2.54577	-0.311058	7.37e-07	4.37e-05
Cd59a	-0.732018	3.36536	8.12e-07	4.79e-05
Acsf2	-0.512741	4.34151	8.21e-07	4.82e-05
1700047I17Rik2	7.4817	2.46068	9.07e-07	5.3e-05
Padi2	0.518943	5.19216	9.25e-07	5.39e-05
L1cam	0.710148	2.92544	1.04e-06	6.03e-05
Tnk2	-0.799043	2.34576	1.19e-06	6.85e-05
Pmepa1	-2.46029	0.147243	1.2e-06	6.89e-05
Apln	-1.93196	0.543224	1.22e-06	6.92e-05
Ctsl	-0.614926	12.1616	1.21e-06	6.92e-05
Angptl2	0.713671	7.38792	1.4e-06	7.92e-05
Sort1	-0.566195	8.09078	1.45e-06	8.16e-05
Socs3	-2.10029	0.0726791	1.55e-06	8.71e-05
Crim1	-0.665125	3.24131	1.62e-06	9.03e-05
Col16a1	-2.48647	-0.0842902	1.7e-06	9.45e-05
Pira2	0.555515	6.29767	1.76e-06	9.77e-05
Rhobtb3	-1.84522	0.246272	1.77e-06	9.79e-05
Kcnn4	0.607459	5.80596	1.83e-06	0.000100463
Mfge8	1.00102	9.19032	1.89e-06	0.000103449
Mgp	-2.15177	-0.254004	2e-06	0.000108499
Ccbe1	-0.823911	2.60553	2.17e-06	0.00011751
Cavin1	-0.711195	3.27338	2.2e-06	0.000118394
Rapgef5	0.860199	4.15901	2.21e-06	0.000118394
Gemin4	-8.01472	0.799112	2.27e-06	0.000120929
Eef1a2	-1.17732	3.96223	2.5e-06	0.000132699
Ly6e	-0.754031	4.97039	2.57e-06	0.000136044
Sgms2	-0.720543	4.51186	2.58e-06	0.000136044
Wwc2	0.540319	4.71718	3.29e-06	0.000171756
C1qa	-0.692184	5.80802	3.36e-06	0.00017492
Ptpn21	-0.532406	3.64374	3.63e-06	0.000188166
Amotl1	-1.54628	0.797741	3.75e-06	0.0001938
Prickle2	-1.00743	2.26249	3.89e-06	0.000200012
Cd81	1.0899	5.48765	4.22e-06	0.00021552
Tenm4	-1.5101	3.19644	4.26e-06	0.000216427
Stard13	-2.12277	-0.263759	4.79e-06	0.000242691
Arhgap22	0.54266	4.61104	5.16e-06	0.000260041
Cela1	-0.63555	3.00659	6.09e-06	0.000303814
Nes	0.843423	4.92953	6.69e-06	0.000330917
Retreg1	0.514837	5.39821	6.76e-06	0.000332937
Kalrn	-1.60416	0.104114	6.93e-06	0.000340345
Cgn	-1.80042	1.09168	6.97e-06	0.000340743
Dnajb14	-0.680913	7.07386	7.02e-06	0.000341012
Dusp4	0.64542	5.46926	7.37e-06	0.000356155
Ston1	-1.85401	-0.0695559	7.76e-06	0.000372447
Lpin1	-0.509536	5.76771	7.88e-06	0.000376918
Aldh1a2	-2.41105	0.105122	8.24e-06	0.000392358
Rps6ka2	0.590326	4.64905	8.83e-06	0.000417401
Creb5	0.56029	4.5163	9.44e-06	0.000441256
Gja1	-1.32072	2.07925	1e-05	0.00046592
Pdlim1	-1.76772	0.753406	1.01e-05	0.00046797
Cmklr1	-0.978028	5.05536	1.03e-05	0.000476928
Gm36161	-0.826472	5.72021	1.1e-05	0.000505274
Ddhd1	-0.708306	6.6453	1.17e-05	0.000536461
Slc46a3	-0.545821	6.18698	1.18e-05	0.000536461
Dhcr24	-0.667299	4.35272	1.19e-05	0.000539608
Rhou	-0.870047	1.82545	1.26e-05	0.000567877
Zbp1	-0.854383	2.61944	1.34e-05	0.000602329
H2-Eb1	1.56038	4.92615	1.4e-05	0.000627918
Cacna2d4	-1.36511	3.80864	1.41e-05	0.000630652
Nfix	-0.506189	3.66258	1.51e-05	0.000672789
Kdm6b	-0.631002	4.52356	1.52e-05	0.000675179
Unc5b	-1.01044	1.68933	1.66e-05	0.000733294
Gm8181	-7.21628	-0.0771166	1.71e-05	0.000746612
Cdk5rap1	-0.769982	3.16169	1.7e-05	0.000746612
Clmp	-1.25265	0.521402	1.76e-05	0.000766781
Sema4b	-0.64291	3.98394	1.83e-05	0.00079546
Gstm2	-0.902798	2.7172	1.92e-05	0.000830201
Ccnd1	0.762544	7.75527	2.27e-05	0.000971025
Olfml3	-1.68671	0.0461766	2.32e-05	0.000989731
Npl	-0.522206	3.95687	2.35e-05	0.00100239
F13a1	-0.814609	2.60583	2.47e-05	0.00104822
Ltbp1	-0.930594	2.02263	2.62e-05	0.00110649
Efemp2	-0.730943	2.77774	2.63e-05	0.00110918
Pyroxd2	-1.02507	1.50592	2.69e-05	0.00113059
Ppbp	-1.27939	2.49916	2.71e-05	0.0011354
Pianp	-0.732005	4.93168	2.74e-05	0.00114393
Lst1	0.594891	4.99466	2.77e-05	0.00115254
Atp1b3	-0.698882	9.0828	2.88e-05	0.00119116
Slamf9	0.513759	3.83069	3.04e-05	0.00125215
Syde1	-0.91231	1.94681	3.45e-05	0.00141147
Afap1	-0.834332	2.82238	3.47e-05	0.00141798
Gcnt2	-1.09357	0.866893	3.57e-05	0.00144359
Pcolce	-1.04357	1.1268	3.57e-05	0.00144359
Sulf2	-0.613815	6.57707	3.62e-05	0.00146057
Pdpn	-0.76171	4.43131	3.98e-05	0.00159485
Vill	1.0304	2.12665	3.98e-05	0.00159485
Cavin2	-1.74276	0.303023	4.11e-05	0.00163483
Pacrg	0.705897	2.56741	4.17e-05	0.00165018
Yes1	-1.72163	0.0905495	4.26e-05	0.00167884
Slco3a1	-0.848839	1.65154	4.29e-05	0.0016866
Lilra6	0.591623	2.94073	4.31e-05	0.0016895
Myo1b	0.543075	3.77289	4.5e-05	0.00175815
Mertk	-0.547061	7.86713	4.85e-05	0.00188934
Rtl6	-0.777502	2.20116	4.97e-05	0.00193223
Slc7a7	-0.576106	4.29165	5.04e-05	0.0019509
Chp2	-1.45208	0.300922	5.65e-05	0.00216188
Col18a1	0.778267	6.10817	5.81e-05	0.00221602
H2afy2	-0.978507	1.3622	5.83e-05	0.00221647
H2-Aa	1.36747	5.61079	5.88e-05	0.00222486
Snn	-0.603723	3.7736	5.92e-05	0.00223155
Nrg1	-2.00613	0.225108	6.24e-05	0.00234135
Irs1	-2.252	-0.291404	6.62e-05	0.00246076
5830444B04Rik	-1.06164	1.57584	6.81e-05	0.00252256
Gm47123	-0.751306	4.0812	7.01e-05	0.00259003
Rgs16	-0.917064	2.20064	7.09e-05	0.0026117
Nup210	0.871009	2.07534	7.34e-05	0.00269825
Serpinb9b	0.736585	2.98908	7.74e-05	0.00282895
A530064D06Rik	-0.777003	4.61202	7.81e-05	0.00284522
Olfml2b	-1.06848	0.757789	8.35e-05	0.00303442
H2-Q6	-1.12582	0.917624	8.53e-05	0.0030802
Rasgrp2	-0.649568	2.9841	8.93e-05	0.00321646
Tmem47	-2.33006	-0.498169	9.01e-05	0.00323529
Nlrp3	0.534015	3.65363	9.37e-05	0.00335831
Serpinb1c	0.848988	2.54652	9.51e-05	0.00338934
A230050P20Rik	-0.661009	2.52534	9.55e-05	0.00339274
Ptprf	-1.48627	0.303013	9.8e-05	0.00347145
Atp8b4	0.535732	6.54238	0.000100705	0.00355815
Pde3a	-1.64878	0.164522	0.000107083	0.00375259
Dpy19l3	-1.54232	0.414309	0.000114662	0.00400725
Pcdh7	0.714931	5.57302	0.000119804	0.00416431
Selenop	-0.516952	11.9782	0.000125516	0.00433941
Nrgn	-1.26549	0.634219	0.000128876	0.00443176
Phf11b	-0.724171	2.53406	0.000134435	0.00459834
Nyap2	1.54189	1.3227	0.000141599	0.0048305
6030408B16Rik	-1.26904	3.71267	0.000142835	0.00485979
B830042I05Rik	-1.04063	5.26092	0.0001676	0.00559869
Serpinb6b	0.555197	4.99247	0.000173377	0.00576175
Fmnl1	0.5069	5.82785	0.000180508	0.00598329
Prkca	-0.717754	2.38447	0.000181191	0.00599047
H2-M2	1.17822	1.18497	0.000190995	0.00629843
Ccr7	1.58699	0.413754	0.000194036	0.00638233
Sorbs3	-0.567527	3.03636	0.000197233	0.00647097
Tmem154	-0.618875	5.92477	0.000202086	0.0066133
Gm13509	6.17349	0.348339	0.00021144	0.00690187
Serpina3g	-1.51586	0.237508	0.000217177	0.00707116
Angpt2	-1.00447	0.773815	0.000221864	0.00720553
Gm6545	-1.68932	0.212198	0.000222786	0.00721724
Il18bp	-0.681133	3.62597	0.000235427	0.00755068
2900026A02Rik	0.850343	2.73055	0.000243476	0.00778942
Ccdc125	-0.563651	3.48779	0.000251274	0.00801896
Arap3	0.623156	3.0921	0.000256884	0.0081374
Tmem26	-1.10099	5.8729	0.000291377	0.00914958
Nod1	-0.560693	4.09951	0.000291682	0.00914958
Cd24a	0.700129	3.40465	0.000301123	0.00939988
Grap	0.956858	1.44371	0.000303256	0.00944351
Cd38	-1.29832	2.18003	0.000304194	0.0094481
Itgb7	0.755168	2.09209	0.000304872	0.0094481
Igsf3	-2.0409	-0.0501766	0.000308316	0.00953185
Hp	-1.10501	0.64665	0.00031084	0.00958685
Gm5615	-1.54325	1.44874	0.000337115	0.0103723
Scd1	-0.916572	1.62102	0.000377078	0.0114919
Gm7935	4.21621	-0.36094	0.000378984	0.0115227
Gm7334	-1.23818	0.457275	0.000383121	0.011621
Oasl1	-1.59883	0.822223	0.000389704	0.0117652
Tacr1	-1.23036	1.5174	0.000444444	0.0133006
Rcn3	-1.0757	0.378026	0.000444699	0.0133006
B430306N03Rik	-0.613246	6.92505	0.000443235	0.0133006
S100a4	0.593999	6.38444	0.000455291	0.0134919
Uggt2	-0.886876	1.16442	0.000466078	0.0137482
Gbp6	-1.16245	1.45933	0.000486631	0.0142889
Chst3	0.544911	2.27147	0.0004954	0.0145133
Igsf8	-0.515218	5.80666	0.000497353	0.0145374
Gpm6b	-1.45759	-0.0611062	0.000506226	0.0147632
Adamts9	-1.6287	-0.0261297	0.000510357	0.01485
Emp2	0.568299	3.84855	0.000515243	0.0149583
Bdh1	1.17388	0.767085	0.000522682	0.0151401
Gm45351	-1.62007	0.918752	0.000533766	0.0153919
Gm37376	-0.875409	6.25054	0.000546632	0.0156925
Arfgef3	0.695293	3.92715	0.000550588	0.0157709
Nol3	-1.51582	0.518938	0.000580782	0.0164585
Plpp3	-0.579775	4.5004	0.000580992	0.0164585
9930111J21Rik1	0.57636	3.82704	0.000580942	0.0164585
Svep1	-1.70558	0.380231	0.000586889	0.0165526
Plpp1	-1.50383	-0.0784456	0.000586055	0.0165526
Tspan7	0.968259	1.77622	0.000607856	0.0171064
Hey1	-0.899988	2.01093	0.000637061	0.0178502
Shld1	-0.678944	3.9638	0.000640585	0.0179099
Gm47547	-2.05496	-0.12491	0.000644819	0.0179167
Alox12	-1.20161	0.612018	0.000643444	0.0179167
Gm49151	-1.11855	3.63323	0.000760667	0.0208817
Hgsnat	-0.573053	6.51016	0.000767009	0.0209883
Pdlim7	-0.861684	1.21982	0.000790082	0.0215281
Slc16a9	-0.642142	2.75691	0.00079622	0.0215583
Lama3	0.742867	2.09291	0.000848594	0.0226898
F5	-1.03323	1.39772	0.000865338	0.0230895
mt-Th	1.80037	-0.11121	0.00086992	0.0231637
Ms4a4a	-0.616388	6.72868	0.000885806	0.0234894
Gpc1	-0.622023	5.39138	0.000903347	0.0238561
F7	-0.53639	5.79488	0.000935401	0.0245514
Clu	-1.32039	-0.10555	0.000940448	0.0245835
Itpr3	0.544377	4.41982	0.000954885	0.0249103
Mvd	-0.515593	3.62301	0.000960411	0.0250037
H2-Ab1	1.1505	4.84049	0.000970971	0.0251767
Cd74	1.06629	7.24472	0.000978422	0.0253189
Cacnb1	-1.09531	0.701255	0.000987525	0.0253504
Dlg5	-0.74155	1.70879	0.000986475	0.0253504
Cxcl2	1.15914	0.165533	0.000982953	0.0253504
Gp5	-1.35803	0.0044055	0.00101359	0.0259159
Cav2	0.523821	5.81703	0.00104569	0.0265782
Rab19	-0.547134	2.98285	0.0010869	0.0275713
Rbpms	-0.661313	2.49155	0.00111767	0.0282404
Synpo	-1.24564	-0.0570236	0.00117472	0.029336
Ccdc148	-0.703316	2.93394	0.00119269	0.0297271
Coro1a	0.568062	6.44435	0.00122298	0.030074
Gm35279	-1.01091	0.851921	0.00124315	0.0304536
Ugt1a6b	5.39115	-0.268031	0.00126475	0.0308067
5930430L01Rik	-1.01759	0.335605	0.00130297	0.0315318
Lyz1	-0.598437	3.19148	0.00130678	0.0315318
Septin5	-1.54767	-0.0604737	0.00132931	0.0320155
Gm45844	-1.14471	0.749824	0.00134811	0.0324076
Nptx1	1.57502	2.76125	0.00143199	0.0340422
Glis2	-1.22858	-0.153363	0.00146912	0.0347963
Srl	0.899743	1.03216	0.00149103	0.0352502
Cdca7	0.64913	2.76305	0.00157968	0.0369792
Abca8b	0.796018	1.76745	0.00158141	0.0369792
Fcna	-1.31856	2.49324	0.00159953	0.0372673
1110032A03Rik	-0.590177	3.82807	0.00165356	0.0383179
Igkc	-1.69321	1.23844	0.00175139	0.0403668
Gm42428	-1.05858	3.39746	0.00177575	0.040855
Pik3r3	-0.838998	1.17475	0.00181536	0.0416173
Bambi-ps1	0.810175	0.936448	0.00189976	0.0433206
Mirt1	-0.947502	0.678702	0.00190592	0.0433842
Stag3	1.09463	0.315662	0.00192999	0.0437001
Ly75	-1.00227	2.01299	0.00198494	0.0446298
Gm49125	-1.19617	1.18624	0.00199428	0.0447616
Uchl1	0.944359	0.766787	0.00200815	0.0449162
C130026I21Rik	-0.764353	1.80665	0.00205172	0.0458112
Rnd2	-0.578402	2.32934	0.00210932	0.0468904
Gm43535	-0.716103	2.53421	0.00215475	0.0477796
Gm17383	-2.70214	0.528446	0.00217073	0.0478739
AI427809	-0.912221	0.834018	0.00218505	0.0480375
Lamb2	-0.890174	0.798701	0.0021979	0.0482376
Camk2b	-0.825684	2.04244	0.0022277	0.0487253
Zfp523	-0.519982	2.83482	0.00222447	0.0487253
Gm26512	1.06872	0.184351	0.00229157	0.0498679
Il1rl2	-0.542784	3.53289	0.0023076	0.0501319
Gm15726	1.12619	1.90682	0.00231279	0.0501598
Oas1g	-0.566165	3.44635	0.00232499	0.0503395
Crip2	-1.04455	0.381851	0.00250509	0.0538726
Ak4	-0.739413	1.4794	0.00256579	0.0549062

## Sheet: Suppl Table 5
Supplementary Table 4. MK2 WT M2 macrophages vs MK2 KO M2 macrophages
	logFC	logCPM	PValue	FDR
Wdfy1	2.21712	5.10257	6.26e-100	8.05e-96
4930402H24Rik	-1.60863	6.61202	1.93e-97	1.24e-93
Gm42429	-7.54215	3.78198	2.84e-66	1.22e-62
Ctgf	-3.62311	3.55425	5.58e-66	1.8e-62
Col5a2	-3.37815	3.36849	3.94e-64	1.01e-60
Col4a1	-2.65774	3.14464	3.99e-61	8.55e-58
Sparc	-2.84666	3.58869	2.37e-57	4.35e-54
Lox	-3.85427	4.40795	5.89e-56	9.47e-53
Col12a1	-3.87294	3.49975	2.14e-54	3.06e-51
Cyp1b1	-3.81869	3.46277	2.87e-54	3.69e-51
Tnc	-3.63938	3.19644	5.92e-54	6.92e-51
Serpine1	-3.19395	4.21846	6.57e-54	7.04e-51
Fbn1	-3.53501	2.33594	1.51e-53	1.5e-50
Bgn	-3.32526	3.87792	6.53e-53	6e-50
Aebp1	-3.75186	2.67707	2.57e-52	2.2e-49
Fat1	-3.40199	2.90095	1.87e-47	1.5e-44
Hspg2	-3.06511	2.44379	1.81e-46	1.37e-43
Cyr61	-3.63103	2.40143	2.5e-45	1.79e-42
Cemip	-3.24258	1.49287	4.09e-44	2.77e-41
Loxl2	-3.57038	2.58273	6.11e-43	3.93e-40
Gm42031	-2.48628	6.47819	9.97e-42	6.1e-39
Nedd4	-2.05122	3.7808	1.82e-41	1.06e-38
Col6a1	-3.65422	2.14588	3.72e-41	2.08e-38
Serpinh1	-3.23864	2.42114	1.74e-40	9.31e-38
Acta2	-2.78851	3.67585	2.35e-39	1.21e-36
Antxr1	-3.07577	1.75655	3.71e-39	1.84e-36
Mapkapk2	-1.14653	6.45958	2.76e-38	1.31e-35
Ltbp2	-3.62525	2.13822	1.07e-37	4.92e-35
Fstl1	-2.36953	3.00564	1.24e-37	5.49e-35
Col6a2	-3.63716	1.62935	2.11e-37	9.04e-35
Cxcl12	-4.05207	1.90757	1.7e-34	7.04e-32
Cald1	-2.95063	4.0263	2.85e-34	1.14e-31
Lamb1	-3.17169	1.95924	5.37e-32	2.09e-29
Ptx3	-3.90785	0.857672	8.24e-31	3.12e-28
Cdkn1c	1.45971	4.7397	2.35e-29	8.64e-27
Col1a2	-3.21151	3.98004	2.61e-29	9.32e-27
Col1a1	-3.54944	3.37215	6.34e-29	2.21e-26
Pdgfra	-4.46107	1.07482	2.63e-28	8.91e-26
Tagln	-2.80846	2.73453	3.56e-28	1.18e-25
S1pr3	-3.99005	0.520629	7.72e-28	2.48e-25
Col3a1	-3.14955	1.63637	7.93e-28	2.49e-25
Dcn	-3.69544	1.72712	2.13e-27	6.51e-25
Nid1	-2.57102	2.55412	4.54e-27	1.36e-24
Gm42427	-1.69262	7.67532	2.79e-26	8.16e-24
Dpysl3	-3.63573	1.08557	3e-26	8.56e-24
Col5a1	-3.56492	1.75846	4.13e-26	1.15e-23
Grem1	-3.61713	3.47005	1.09e-25	2.97e-23
Enpp2	-3.52612	0.811514	1.33e-25	3.56e-23
Col6a3	-3.09904	1.88554	1.48e-25	3.89e-23
Cdh11	-3.61907	2.35008	3.47e-25	8.94e-23
Col4a2	-2.42748	2.37094	5.15e-25	1.3e-22
Myl9	-3.86721	0.993073	9.61e-25	2.38e-22
Igfbp7	-2.53954	1.72368	2.69e-24	6.53e-22
Fbln2	-3.47669	1.87781	1.6e-23	3.81e-21
Fkbp10	-4.24811	0.355136	4.38e-23	1.03e-20
Prrx1	-3.04027	1.77054	9.89e-23	2.27e-20
Col8a1	-3.6047	1.67837	2.27e-22	5.12e-20
Dhrs9	0.919975	6.48075	1.95e-21	4.33e-19
Gm26880	-1.41388	5.47635	2.07e-21	4.51e-19
Gm48274	-2.55917	3.25422	2.49e-21	5.34e-19
Vgll3	-3.21625	1.32261	3.93e-21	8.28e-19
Lama4	-3.56434	0.701202	1.06e-20	2.2e-18
Serpinb9b	1.33581	2.98908	1.08e-20	2.21e-18
Ddr2	-2.92662	1.52131	1.54e-20	3.09e-18
Thbs1	-2.95552	8.28412	1.72e-20	3.4e-18
Tnip3	1.04089	5.08363	3.48e-20	6.78e-18
Kirrel	-3.4968	0.883484	1.17e-19	2.24e-17
Mrc2	-3.5487	0.577013	4.25e-19	8.03e-17
Grb10	-3.2688	1.05593	1.64e-18	3.06e-16
Bmp1	-2.91413	1.05658	4.25e-18	7.81e-16
Tead1	-2.63367	1.50087	1.98e-17	3.58e-15
Sod3	-3.02128	0.229047	4.5e-17	8.03e-15
Thbs2	-4.57228	0.410549	9.5e-17	1.67e-14
Cnn3	-2.25821	1.40775	1.12e-16	1.94e-14
Sema7a	-3.10748	0.821372	2.19e-16	3.76e-14
Adamts5	-3.85636	-0.0897397	3.53e-16	5.98e-14
Dclk1	-2.15871	1.58273	4.51e-16	7.53e-14
Tpm2	-2.19413	1.80237	5.33e-16	8.79e-14
Ptpn14	-2.89586	0.751268	6.26e-16	1.02e-13
Cp	-1.79854	2.07565	1.06e-15	1.71e-13
Fermt2	-3.13508	1.14783	1.14e-15	1.81e-13
Mgl2	1.1941	4.07907	1.17e-15	1.83e-13
Neo1	-1.72212	2.40619	1.55e-15	2.4e-13
Ehd2	-2.31052	0.985467	2.01e-15	3.07e-13
Serpinf1	-3.42942	0.62419	2.98e-15	4.51e-13
Errfi1	-0.964468	3.18452	3.24e-15	4.84e-13
Mxra8	-3.96705	0.298142	3.38e-15	4.99e-13
Osmr	-3.29986	0.666859	3.9e-15	5.65e-13
Cttn	-1.05817	3.89635	3.91e-15	5.65e-13
Enah	-2.11173	1.833	5.55e-15	7.93e-13
Pxdn	-3.89139	0.166541	7.06e-15	9.97e-13
Cdh2	-2.82886	0.97824	1.06e-14	1.48e-12
Phldb2	-2.65909	0.762953	1.26e-14	1.74e-12
Dio2	0.900482	5.85727	5.83e-14	7.98e-12
Tbx15	-4.80053	-0.224142	7.29e-14	9.87e-12
Ogn	-4.89869	-0.206507	1.31e-13	1.75e-11
Fam198b	0.696095	7.47283	1.32e-13	1.75e-11
Serpinb2	-2.76289	0.700973	1.47e-13	1.93e-11
Timp1	-2.39502	1.71491	2.01e-13	2.61e-11
Pdgfrb	-3.04274	0.807059	2.12e-13	2.72e-11
Dnmt3a	0.586339	8.83849	2.19e-13	2.79e-11
Ptprd	-4.23929	0.133644	2.86e-13	3.6e-11
Dlc1	-2.32329	0.958261	3.63e-13	4.53e-11
Vcan	-1.78627	1.58533	5.88e-13	7.27e-11
Msrb3	-3.20304	0.263218	7.41e-13	9.08e-11
Parva	-2.23757	1.21618	9.45e-13	1.15e-10
Mylk	-2.02392	1.02403	1.76e-12	2.12e-10
Npy	1.08441	5.54831	1.9e-12	2.27e-10
Loxl1	-3.18921	0.38689	2.15e-12	2.54e-10
Scd2	-0.936802	7.01697	2.31e-12	2.7e-10
Tgfb1i1	-2.56352	0.492547	2.49e-12	2.88e-10
Sulf1	-2.48454	0.589995	3.61e-12	4.15e-10
Slit2	-3.08867	0.567739	4e-12	4.55e-10
Inhba	-2.03922	2.00546	6.2e-12	7e-10
Amotl2	-2.7934	0.594867	1.11e-11	1.24e-09
Gm43305	-1.0897	8.38595	1.12e-11	1.25e-09
Egfr	-2.0047	0.851848	1.56e-11	1.71e-09
Epas1	-1.96026	5.20823	2.14e-11	2.33e-09
Wwtr1	-3.46356	-0.15989	2.25e-11	2.43e-09
Serping1	-2.64446	0.75208	2.46e-11	2.64e-09
Ncam1	-2.95385	0.268735	4.79e-11	5.09e-09
Fat4	-3.0695	0.468466	5.78e-11	6.09e-09
Fgf7	-2.9883	0.367382	6.1e-11	6.38e-09
Prss23	-3.10568	0.189827	6.28e-11	6.52e-09
Yap1	-2.52239	0.484175	7.29e-11	7.5e-09
Ptgfrn	-0.821236	4.43532	7.58e-11	7.74e-09
Lurap1l	-4.33772	-0.268425	8.64e-11	8.75e-09
Inhbb	-3.70511	-0.357105	1.47e-10	1.47e-08
Plod2	-1.71944	1.78572	1.75e-10	1.75e-08
Gpc4	-3.4714	0.0112125	2.82e-10	2.79e-08
Map4k4	-0.645351	7.36843	3.53e-10	3.44e-08
Bicc1	-3.48761	-0.101604	4.15e-10	4.01e-08
Lhfp	-2.43231	0.829651	4.95e-10	4.75e-08
Adamts2	-2.61636	0.429547	5.45e-10	5.19e-08
Ptprg	-3.01224	0.0641374	5.82e-10	5.51e-08
Crim1	-0.955117	3.24131	6.02e-10	5.65e-08
Tjp1	-2.48493	0.458578	6.47e-10	6.03e-08
Timp3	-1.54827	1.78462	8.22e-10	7.61e-08
Cela1	-0.933222	3.00659	1.21e-09	1.11e-07
Col16a1	-3.23501	-0.0842902	1.26e-09	1.15e-07
Syt13	-1.98844	0.357683	1.43e-09	1.29e-07
Tgfb2	-2.79509	0.13075	1.55e-09	1.39e-07
Tm4sf1	-2.57699	0.0246344	1.6e-09	1.43e-07
Akap12	-2.42727	0.754014	1.69e-09	1.49e-07
Cdk5rap1	-1.09711	3.16169	1.92e-09	1.69e-07
C1qa	-0.90851	5.80802	2.05e-09	1.79e-07
Irs1	-3.48836	-0.291404	2.22e-09	1.93e-07
Dusp4	0.817226	5.46926	2.25e-09	1.93e-07
Mfge8	1.26225	9.19032	2.23e-09	1.93e-07
Ighg2b	-3.89635	0.0631055	2.6e-09	2.2e-07
L1cam	0.95325	2.92544	2.58e-09	2.2e-07
Fhl2	-3.10781	-0.198228	3.3e-09	2.77e-07
Htra1	-1.13536	2.18035	3.6e-09	3e-07
Vwf	0.641899	6.94403	3.61e-09	3e-07
Lrrc32	0.942287	2.83332	3.92e-09	3.23e-07
Rbfox2	-1.27152	1.61402	4.03e-09	3.3e-07
Nfib	-2.78842	0.183658	4.18e-09	3.4e-07
Ddah1	-2.81597	0.0375469	5.16e-09	4.18e-07
Sdc2	-2.41046	1.09904	5.34e-09	4.29e-07
Cadm1	-1.88253	7.64211	5.87e-09	4.69e-07
Gpx8	-2.83108	-0.218457	6.53e-09	5.18e-07
Gm2115	-2.56509	0.115115	6.76e-09	5.31e-07
Apln	-2.34975	0.543224	6.77e-09	5.31e-07
Robo1	-3.52828	-0.199734	6.89e-09	5.37e-07
Fscn1	-1.61917	1.66307	7.33e-09	5.68e-07
Ms4a6b	-0.657094	5.20574	9.16e-09	7.05e-07
Nsg1	-2.62702	0.221143	1.05e-08	8.04e-07
Cd52	0.557689	6.87449	1.06e-08	8.08e-07
3110039I08Rik	-2.12133	0.873566	1.09e-08	8.28e-07
Ccdc80	-1.90114	1.03624	1.16e-08	8.76e-07
Pdk4	-2.13268	0.749849	1.24e-08	9.26e-07
Dip2c	-0.554791	4.57519	1.27e-08	9.46e-07
Scube3	-2.58102	0.328069	1.45e-08	1.07e-06
Ghr	-2.31254	0.143858	1.59e-08	1.16e-06
Cd72	0.524804	7.02335	1.67e-08	1.21e-06
Olfml3	-2.59894	0.0461766	1.71e-08	1.23e-06
Adgrf5	-2.61838	0.28373	1.74e-08	1.24e-06
Apoe	-0.854906	11.9102	1.81e-08	1.29e-06
Il1a	-1.25591	2.42619	1.86e-08	1.31e-06
Pira2	0.661319	6.29767	1.92e-08	1.35e-06
Ptprf	-1.81716	0.303013	2.2e-08	1.54e-06
B3gnt5	1.29562	1.65025	2.43e-08	1.69e-06
Angptl2	0.809537	7.38792	2.7e-08	1.87e-06
Mmp13	0.792902	4.5217	2.85e-08	1.96e-06
Arhgap29	-1.93325	0.819146	3.05e-08	2.09e-06
Mmp14	-1.22932	5.20938	3.12e-08	2.12e-06
Adm	-2.55704	-0.125661	3.24e-08	2.19e-06
Pcdh1	-2.95214	-0.303562	3.36e-08	2.27e-06
Map1b	-1.95969	0.593646	3.55e-08	2.38e-06
Arhgef17	-1.87542	0.597001	3.61e-08	2.41e-06
Gm7935	7.14004	-0.36094	4.56e-08	3.02e-06
Csf1	-0.951155	4.7116	4.63e-08	3.05e-06
Lif	-2.95321	-0.111831	5e-08	3.28e-06
Pcolce	-1.38769	1.1268	5.04e-08	3.29e-06
Gja1	-1.67787	2.07925	5.72e-08	3.72e-06
Prickle2	-1.01431	2.26249	6.53e-08	4.22e-06
Pdgfc	-0.783697	5.07048	9.13e-08	5.87e-06
Pdgfa	0.517968	4.41598	1.3e-07	8.25e-06
Postn	-1.28458	2.10228	1.32e-07	8.3e-06
Bcar1	-2.13312	0.0435185	1.38e-07	8.65e-06
Mmp2	-1.63877	0.683565	1.43e-07	8.9e-06
Dcstamp	1.58119	2.79559	1.6e-07	9.93e-06
Slc7a7	-0.762032	4.29165	2.76e-07	1.69e-05
Flt1	1.18653	1.8095	3.45e-07	2.1e-05
Flnb	-0.670222	4.83029	3.69e-07	2.24e-05
Adgra2	-1.52843	0.547096	3.91e-07	2.36e-05
Lsp1	0.966662	4.76678	4.23e-07	2.54e-05
Dbn1	-2.77785	-0.262367	4.38e-07	2.62e-05
Cgn	-2.15192	1.09168	5e-07	2.98e-05
Ptk7	-2.53706	-0.0989429	5.12e-07	3.02e-05
Ccr3	0.653353	5.90077	5.11e-07	3.02e-05
Padi2	0.542329	5.19216	5.32e-07	3.13e-05
Gm4316	-0.810705	5.60803	6.13e-07	3.58e-05
Arhgap22	0.617476	4.61104	6.14e-07	3.58e-05
Rasgrp2	-0.880163	2.9841	9.06e-07	5.25e-05
Rhobtb3	-2.04093	0.246272	9.51e-07	5.48e-05
Eml1	-2.88293	-0.311058	1.04e-06	5.92e-05
Cd302	-0.522748	5.17675	1.05e-06	5.95e-05
Svep1	-1.75554	0.380231	1.07e-06	6.04e-05
Fkbp9	-0.545868	4.49384	1.07e-06	6.04e-05
BC021767	-1.97301	0.934083	1.08e-06	6.09e-05
Amotl1	-1.66356	0.797741	1.16e-06	6.47e-05
S100a4	0.827648	6.38444	1.18e-06	6.57e-05
Gm42428	-1.70657	3.39746	1.31e-06	7.18e-05
Chst3	0.746638	2.27147	1.4e-06	7.65e-05
Dlg5	-1.16266	1.70879	1.46e-06	7.97e-05
Pbxip1	-0.574222	3.9007	1.56e-06	8.48e-05
Slco2a1	-2.37758	-0.241308	1.68e-06	9.07e-05
Angpt2	-1.4642	0.773815	1.69e-06	9.07e-05
Fyn	0.513264	5.77637	1.69e-06	9.07e-05
Rcn3	-1.63325	0.378026	1.92e-06	0.000102333
Ryk	-0.954257	2.08457	2.01e-06	0.000106681
Fbxo32	-1.29099	4.84742	2.1e-06	0.000110974
Tenm4	-1.56167	3.19644	2.26e-06	0.000118505
Tmem47	-3.32404	-0.498169	2.32e-06	0.00012132
Gpm6b	-2.11921	-0.0611062	2.38e-06	0.000124087
Slc7a11	0.678794	4.92491	2.61e-06	0.000135598
Kcnn4	0.599969	5.80596	2.73e-06	0.000140977
G530011O06Rik	1.28002	4.10143	2.76e-06	0.000141897
Actg2	-2.26114	-0.295413	2.88e-06	0.000146161
Wfs1	-0.687955	5.02032	2.86e-06	0.000146161
Cacna1b	1.00531	2.07005	2.87e-06	0.000146161
Loxl3	-0.602983	4.20702	3.04e-06	0.000154139
Slc30a4	0.539628	5.029	3.33e-06	0.000167806
St3gal5	0.7689	4.33144	3.34e-06	0.000167806
Fzd1	-0.824258	2.7519	3.43e-06	0.000171153
Serpinb1c	0.992447	2.54652	3.55e-06	0.000176188
Tspan7	1.15775	1.77622	3.71e-06	0.000183592
H2-Q6	-1.39921	0.917624	4.07e-06	0.000200755
Irf4	1.09144	1.71458	4.1e-06	0.000201323
Syde1	-1.03732	1.94681	4.35e-06	0.00021258
Ltbp1	-1.03101	2.02263	4.47e-06	0.000217879
Mpp7	-1.41891	2.58852	4.55e-06	0.000220681
Ddx60	-0.741359	3.65323	5.35e-06	0.000258515
F13a1	-0.979789	2.60583	5.66e-06	0.000271393
Oasl1	-2.24928	0.822223	5.69e-06	0.000272004
Adam19	-1.62235	4.69881	5.8e-06	0.000276472
Creb5	0.569111	4.5163	5.87e-06	0.00027866
Socs3	-1.83171	0.0726791	6.59e-06	0.000310435
Npl	-0.559806	3.95687	6.57e-06	0.000310435
Epb41l3	-1.42937	3.45973	7.1e-06	0.000332135
Serpina3g	-1.43718	0.237508	7.21e-06	0.000335983
Nes	0.847364	4.92953	7.65e-06	0.000355023
Pcdh19	-2.17354	-0.257531	8.24e-06	0.000381303
Gm21742	1.98727	0.328561	8.62e-06	0.000397194
Ly6e	-0.701669	4.97039	9.48e-06	0.000433723
Vill	1.07721	2.12665	1.11e-05	0.000504608
Ifi206	-2.03246	0.945494	1.16e-05	0.000526634
Serpinb6b	0.649666	4.99247	1.17e-05	0.000528031
Ston1	-2.01793	-0.0695559	1.22e-05	0.000546578
Phyhd1	-0.658998	2.93395	1.32e-05	0.000586419
Ehd3	-1.46793	0.639907	1.52e-05	0.000672371
Pcdh7	0.803288	5.57302	1.59e-05	0.000698736
Ccl8	-1.48551	2.23883	1.64e-05	0.000721227
Pacrg	0.672635	2.56741	1.68e-05	0.000732766
Pgm5	0.858671	2.01429	1.74e-05	0.000757665
Snai2	-2.33415	-0.0447453	1.79e-05	0.000776303
Cx3cl1	-1.80989	0.145164	1.8e-05	0.000778868
P2ry1	0.603938	3.75415	1.8e-05	0.000778868
Emp2	0.689931	3.84855	1.82e-05	0.000782586
Lipn	0.868881	3.91701	1.93e-05	0.000825971
Rtl6	-0.788272	2.20116	2.01e-05	0.000857381
A530064D06Rik	-0.865202	4.61202	2.06e-05	0.000876037
Nynrin	-1.93934	0.417121	2.07e-05	0.000877532
Cd24a	0.828052	3.40465	2.1e-05	0.000886381
Gm11808	-3.32202	0.858616	2.12e-05	0.000889424
Zfp532	-0.766802	2.53438	2.12e-05	0.000889424
Stard13	-2.05957	-0.263759	2.28e-05	0.000951736
Ppbp	-1.28658	2.49916	2.33e-05	0.000971749
Jcad	0.608855	3.93815	2.79e-05	0.00115759
Ak4	-0.875861	1.4794	2.92e-05	0.00120625
Lamb2	-1.34402	0.798701	3.05e-05	0.00125589
Laptm4b	-0.607655	2.7725	3.43e-05	0.00140384
Enpp4	-1.50772	0.396906	4.1e-05	0.00167428
Abca1	-0.579205	9.70992	4.12e-05	0.00167749
Gm15726	1.4413	1.90682	4.43e-05	0.00177933
Ifi44	-1.91627	0.655483	4.64e-05	0.00184669
Tgfb3	-1.98516	0.145024	4.85e-05	0.00192563
Entpd4b	-0.604626	3.34294	4.98e-05	0.00197126
Cd38	-1.4422	2.18003	5.42e-05	0.00213139
Cd59a	-0.615988	3.36536	5.42e-05	0.00213139
Mtss1l	-1.6847	-0.0169372	5.74e-05	0.00224958
Nod1	-0.636509	4.09951	6.38e-05	0.00249424
Atp1b3	-0.663369	9.0828	7.02e-05	0.00272715
Col18a1	0.772523	6.10817	7.17e-05	0.00277658
Cfh	-0.728024	4.77176	7.64e-05	0.0029504
Nyap2	1.23144	1.3227	7.89e-05	0.00303911
Rapgef5	0.750556	4.15901	8.23e-05	0.00315821
Tmem176a	-0.914458	2.10336	8.36e-05	0.00319965
Itga2b	-1.07567	1.79638	8.68e-05	0.00331304
Ccdc125	-0.626091	3.48779	8.71e-05	0.00331548
Sgms2	-0.586393	4.51186	8.83e-05	0.00333766
Efemp2	-0.707125	2.77774	9.43e-05	0.00353466
Src	0.579055	4.41803	9.67e-05	0.00361678
Dhcr24	-0.567762	4.35272	0.000102305	0.00381375
Efnb2	-1.47394	0.197254	0.000105625	0.00392615
Slamf6	-1.54188	0.39009	0.000110923	0.00411119
Entpd4	-0.540423	4.15698	0.000111681	0.00412737
Ocstamp	1.46305	0.460972	0.000115086	0.00422893
Gpr183	0.57002	3.73035	0.000118623	0.00434647
Gcnt2	-1.07954	0.866893	0.00012097	0.00440735
Htr2b	0.73655	3.70702	0.000130584	0.00474418
Kif26b	-1.93078	-0.429491	0.000132145	0.00478736
Itgb3	0.5588	7.33311	0.000132689	0.0047932
Itga9	-0.54898	3.53582	0.000134927	0.00484719
Dbp	-0.637805	3.53192	0.000135582	0.00485717
Eef1a2	-0.943036	3.96223	0.000136737	0.00488491
Hgsnat	-0.648925	6.51016	0.000138281	0.00492639
Dnajb14	-0.573375	7.07386	0.000152298	0.00535164
H2-M2	1.10903	1.18497	0.00016815	0.00584481
Nr1d1	-0.828579	2.1194	0.000170269	0.00590251
Tiam1	0.520149	3.83366	0.000182825	0.00628692
Synpo	-1.6589	-0.0570236	0.00018575	0.00637049
Gm26920	-5.87732	-0.342007	0.000188168	0.00641917
Tox2	0.880219	3.79781	0.00018767	0.00641917
Zfyve9	-0.598997	3.34192	0.000189571	0.00644434
Cd81	0.887412	5.48765	0.000189908	0.00644434
Ets1	0.524669	3.11485	0.000228762	0.00764185
Rab15	1.4971	-0.0113505	0.000229542	0.00764802
Tmem154	-0.61081	5.92477	0.000245204	0.00810686
Gstm2	-0.742091	2.7172	0.000275773	0.00902473
Serpine2	-0.788544	3.63392	0.000276989	0.00904151
Fn1	-0.881269	7.21052	0.000281704	0.00913229
Htr2a	0.741463	2.67493	0.00029114	0.00940791
Plekhg5	-0.766881	1.52219	0.000301136	0.00968228
Ccl22	1.37536	0.862818	0.000310978	0.00997378
Palm	-0.777179	1.66202	0.000318175	0.010154
Crip2	-1.19209	0.381851	0.000328915	0.0104707
Nupr1	-0.81492	1.98422	0.000339808	0.0107378
Klf8	0.591287	2.0878	0.000339336	0.0107378
Glis2	-1.47712	-0.153363	0.000342063	0.0107825
mt-Nd4l	0.615607	8.03104	0.000356414	0.0112074
F5	-1.16081	1.39772	0.000389123	0.0121764
Slc16a9	-0.724375	2.75691	0.00039225	0.0122445
Cmklr1	-0.783831	5.05536	0.000395442	0.0123142
Il1r1	-1.16385	0.477842	0.000397983	0.0123634
Nfkbiz	-1.13455	1.52447	0.000407659	0.0125428
H2-Eb1	1.24773	4.92615	0.000406828	0.0125428
Scd1	-0.836608	1.62102	0.00040997	0.0125838
Prl2c2	1.81888	0.115645	0.000422483	0.012937
Adcy6	-1.45711	0.785961	0.000442545	0.0134266
Ppp1r9a	-0.7913	2.25806	0.000442645	0.0134266
Vdr	-1.40575	-0.298865	0.000458949	0.0138595
Lbp	-1.26226	0.670867	0.000459073	0.0138595
Tnk2	-0.539362	2.34576	0.000461199	0.0138911
Gm45351	-1.56729	0.918752	0.000491016	0.0147202
Awat1	0.821198	1.92446	0.000498112	0.0148292
5830444B04Rik	-0.94792	1.57584	0.000508843	0.0150789
S100a6	0.569705	6.57824	0.000516149	0.0152252
Nradd	-0.989049	1.02641	0.000521608	0.0152973
Rhou	-0.70568	1.82545	0.000523352	0.0152973
Sorbs3	-0.584872	3.03636	0.00052724	0.015376
H2-Aa	1.1673	5.61079	0.000537834	0.0156142
Gm48493	-5.70526	-0.268088	0.000587668	0.0169843
Epha2	-1.56665	-0.0982965	0.000621824	0.017891
C130026I21Rik	-0.859686	1.80665	0.000653673	0.0187236
Spsb4	-0.568748	3.49698	0.000666193	0.0190398
Nrgn	-1.16179	0.634219	0.000672135	0.019167
Slc36a2	-1.43936	1.76815	0.00068586	0.0194721
Ccnd2	-1.06656	2.99269	0.000705596	0.0199443
Psrc1	0.594935	2.08933	0.000721777	0.020357
Slco3a1	-0.728814	1.65154	0.000729988	0.0205435
Fkbp14	-1.15719	0.23943	0.000745965	0.0209473
Dut	0.596793	3.77612	0.000759419	0.0211863
Tsku	-0.577759	2.77267	0.000771675	0.0214816
Zfp791	-0.926129	1.15788	0.000777899	0.0216081
Cpne8	-1.14895	1.27461	0.000803267	0.0222207
Proz	-0.505523	2.3121	0.000804954	0.0222207
Itgb7	0.693579	2.09209	0.000827223	0.0227327
Tcaf1	-0.980013	1.11276	0.000924646	0.0249305
Tal1	0.548639	3.95563	0.000937475	0.0251709
Zfp979	1.73189	0.00289304	0.00095264	0.0254717
Alox12	-1.1162	0.612018	0.00103009	0.0273155
Farp1	-1.17824	0.602113	0.00103321	0.0273419
Lancl3	1.44162	0.103137	0.00104498	0.0275399
H2-Ab1	1.12846	4.84049	0.00107868	0.0280828
Pdpn	-0.594829	4.43131	0.00116864	0.0299998
Hspa1a	1.15583	1.16175	0.00127147	0.0325097
Gpr68	0.742205	1.32088	0.0012882	0.0327422
Gm14548	0.533382	5.68491	0.00129881	0.0329468
Mgp	-1.45683	-0.254004	0.00133029	0.0336127
Adam12	-1.4056	0.144846	0.00134175	0.0336136
Rap1gap2	-0.857633	1.07241	0.0013434	0.0336136
Uchl1	0.972443	0.766787	0.00134185	0.0336136
Gypc	-0.519765	3.00529	0.00145697	0.0361057
Spsb1	-0.887801	0.752032	0.00149559	0.0368481
Mid1	0.629969	5.78832	0.00152035	0.0373154
Gm47123	-0.568616	4.0812	0.00153192	0.0375277
Dchs1	-0.691333	1.68611	0.00156196	0.0381184
Gm43549	4.09495	0.310118	0.00156683	0.0381648
Gm20056	0.539174	2.93719	0.0015923	0.0386884
Slc2a6	0.895362	1.56078	0.00159434	0.0386884
Cdc42ep2	0.724251	2.09987	0.00169311	0.0404742
Nptx1	1.58753	2.76125	0.00171786	0.0409896
Ptgir	0.501835	3.3543	0.0017712	0.0420285
Tm4sf19	0.515176	3.42711	0.00181845	0.04307
Nectin1	-1.22642	0.0059349	0.00188346	0.0443277
Cldn11	1.07114	1.30129	0.00188533	0.0443277
Cxcl14	-1.01423	0.742492	0.0019034	0.0446707
Ifi27l2a	-0.633578	4.3218	0.00192034	0.0449864
Kif1a	-0.616153	2.79603	0.00198626	0.0464459
Olfm4	-1.07703	0.920183	0.00200119	0.0466256
Pde3a	-1.35379	0.164522	0.00204987	0.0470774
Ciita	1.04321	1.85768	0.00204827	0.0470774
Ccnd1	0.554164	7.75527	0.00207793	0.0474677
Btbd8	0.72118	1.85655	0.00208946	0.0476463
Wtip	-0.749866	1.67188	0.00213587	0.0484469
Hist2h3c1	5.15673	-0.225427	0.00217705	0.0492941
Ggct	-0.652178	1.90448	0.00223288	0.0502925
A130071D04Rik	-1.39351	-0.123829	0.00227706	0.0510197
Krba1	-0.8821	0.633818	0.00231497	0.0517788
Ifit3	-0.734803	3.52301	0.00233458	0.0521269
Cd74	0.979758	7.24472	0.00235601	0.0525141
Map2	0.848728	1.8553	0.00240403	0.0531242
Tnfsf13os	-1.01111	0.986843	0.00241171	0.0532023
Tmem158	0.644483	2.23174	0.00246323	0.0541531
Pkp2	0.687213	3.12012	0.00246058	0.0541531
Cavin2	-1.27209	0.303023	0.0025215	0.0548714

## Sheet: Suppl Table 6
Supplementary Table 5. MK2 WT M0 macrophages vs MK2 KO M2 macrophages
	logFC	logCPM	PValue	FDR
Mgl2	5.5518	4.07907	2.69e-154	3.46e-150
4930402H24Rik	-1.6158	6.61202	3.72e-98	2.39e-94
Wdfy1	2.19658	5.10257	8.17e-98	3.5e-94
Col4a1	-3.19242	3.14464	3.74e-93	1.2e-89
Ctgf	-4.25823	3.55425	4.04e-92	1.04e-88
Dhrs9	1.90483	6.48075	6.38e-81	1.37e-77
Serpine1	-3.93796	4.21846	1.53e-79	2.81e-76
Col5a2	-3.66903	3.36849	7.83e-76	1.26e-72
Gm42429	-8.07191	3.78198	2.4e-75	3.43e-72
Retnla	10.8101	5.10249	5.43e-73	6.98e-70
Il1rl2	2.39072	3.53289	2.76e-71	3.22e-68
Bgn	-3.88056	3.87792	7.22e-71	7.74e-68
Vwf	1.96226	6.94403	1.11e-67	1.1e-64
Sparc	-3.08621	3.58869	2.48e-67	2.28e-64
Col12a1	-4.31785	3.49975	3.91e-67	3.35e-64
Cyr61	-4.2975	2.40143	4.77e-67	3.84e-64
Slc7a2	3.80249	5.75735	3.49e-65	2.64e-62
Angptl2	2.61883	7.38792	7.6e-65	5.43e-62
Aebp1	-4.13666	2.67707	2.01e-64	1.36e-61
Wdfy2	1.45461	8.10095	4.64e-64	2.98e-61
Arg1	6.25509	2.3361	3.11e-61	1.9e-58
Dusp4	2.371	5.46926	5.02e-61	2.94e-58
Ptgs1	2.59316	4.88987	3.09e-58	1.73e-55
Tnc	-3.77938	3.19644	4.42e-58	2.37e-55
Acta2	-3.39561	3.67585	1.06e-57	5.43e-55
Serpinb9b	2.59393	2.98908	1.98e-57	9.8e-55
Lipn	3.79662	3.91701	1.64e-56	7.79e-54
Fat1	-3.67373	2.90095	1.17e-55	5.4e-53
Gatm	1.63516	6.91665	2.96e-55	1.31e-52
Fam198b	1.48745	7.47283	2.84e-54	1.22e-51
Gm42031	-2.8426	6.47819	8.1e-53	3.36e-50
Mcf2l	2.4761	4.40442	8.69e-52	3.49e-49
Loxl2	-3.90855	2.58273	1.26e-51	4.92e-49
Flrt2	1.84661	7.39419	4.06e-51	1.54e-48
Nedd4	-2.2627	3.7808	3.22e-50	1.18e-47
Rnf19b	1.93403	6.58037	6.45e-50	2.3e-47
Dnmt3a	1.18288	8.83849	2.03e-48	7.06e-46
Anxa1	1.17099	10.8243	8.86e-48	3e-45
Kcnd3	7.10086	2.27808	1.21e-47	3.97e-45
Il6st	1.31333	9.12077	2.39e-47	7.67e-45
Fstl1	-2.63201	3.00564	9.29e-47	2.91e-44
Cyp1b1	-3.53113	3.46277	1.25e-46	3.82e-44
Hspg2	-3.07587	2.44379	2.43e-46	7.28e-44
Bcar3	1.34002	6.02421	3.43e-46	1e-43
Lrrc32	2.57272	2.83332	2.17e-44	6.2e-42
Cald1	-3.39917	4.0263	3.64e-44	1.02e-41
Serpinh1	-3.3768	2.42114	6.96e-44	1.9e-41
Fbn1	-3.20984	2.33594	6.43e-43	1.72e-40
Ak2	1.33589	6.1304	1.71e-41	4.5e-39
Tagln	-3.36888	2.73453	1.88e-40	4.84e-38
Ltbp2	-3.74597	2.13822	2.35e-40	5.88e-38
Tmem26	4.22007	5.8729	2.38e-40	5.88e-38
Flt1	4.00094	1.8095	3.33e-40	8.07e-38
Antxr1	-3.10941	1.75655	1.1e-39	2.61e-37
Pou2f2	-2.05402	4.69495	3.43e-39	8.03e-37
Clic4	1.02134	9.84722	6.88e-39	1.57e-36
Itgb3	1.97496	7.33311	6.94e-39	1.57e-36
Col4a2	-2.98601	2.37094	1.22e-38	2.71e-36
Ccl9	1.31903	9.10515	1.29e-38	2.81e-36
Csf2rb	1.59752	8.94741	2.14e-38	4.59e-36
Col3a1	-3.60655	1.63637	3.01e-38	6.36e-36
Man1a	1.42236	7.83479	3.68e-38	7.64e-36
Igfbp7	-3.07158	1.72368	1.59e-37	3.24e-35
Clcn5	1.09016	6.7031	2.68e-37	5.4e-35
Mapkapk2	-1.13178	6.45958	2.75e-37	5.43e-35
Bhlhe40	1.72329	6.77824	4.91e-37	9.56e-35
Lox	-3.04824	4.40795	6.86e-37	1.31e-34
Gm5345	3.97305	1.35372	6.92e-37	1.31e-34
Anxa4	0.982414	9.59828	8.7e-37	1.62e-34
Ralgds	1.92952	6.29601	3.71e-36	6.82e-34
Gm42427	-2.02104	7.67532	4.15e-36	7.52e-34
Cxcl12	-4.14215	1.90757	1.36e-35	2.43e-33
Scn3a	9.68912	2.01563	1.43e-35	2.52e-33
Slamf8	1.95443	5.24855	1.5e-35	2.61e-33
Myl9	-4.40094	0.993073	3.36e-35	5.77e-33
Lamb1	-3.29424	1.95924	5.28e-35	8.94e-33
Fchsd2	1.42171	6.89383	1.08e-34	1.8e-32
Zcchc24	-0.917647	5.355	1.1e-34	1.82e-32
Nfil3	2.30064	3.68543	1.46e-34	2.38e-32
Inpp5a	1.30427	4.72155	1.8e-34	2.89e-32
Plekhg1	1.99709	4.29346	2.56e-34	4.07e-32
Jak2	1.51341	6.39809	3.02e-34	4.73e-32
Cldn11	7.64294	1.30129	1.65e-33	2.55e-31
Tnfrsf26	1.43809	4.74545	1.75e-33	2.68e-31
Ampd3	-1.14352	5.55441	4.38e-33	6.63e-31
Col6a2	-3.44461	1.62935	7.59e-33	1.13e-30
Gm26880	-1.7766	5.47635	1.17e-32	1.73e-30
Nek6	0.945566	6.37065	1.48e-32	2.16e-30
Cblb	1.28598	7.95374	3.51e-32	5.07e-30
Fbln2	-4.04613	1.87781	4.19e-32	5.99e-30
Elk3	-1.0174	4.98148	6.85e-32	9.68e-30
Rgl1	1.02074	7.43298	1.01e-31	1.42e-29
Cd300lb	0.900761	8.34568	1.04e-31	1.44e-29
Gpc1	2.14666	5.39138	1.94e-31	2.66e-29
Znrf2	0.94209	7.26607	2.17e-31	2.93e-29
Cdh11	-4.05119	2.35008	3.44e-31	4.6e-29
Myrf	2.02619	4.36841	3.84e-31	5.1e-29
Dcn	-3.90888	1.72712	5.75e-31	7.54e-29
Col1a1	-3.68382	3.37215	7.31e-31	9.49e-29
Col1a2	-3.29474	3.98004	1.14e-30	1.46e-28
Ms4a6b	-1.2982	5.20574	1.38e-30	1.76e-28
Col8a1	-4.17242	1.67837	4.8e-30	6.05e-28
Col6a1	-3.16765	2.14588	5.52e-30	6.89e-28
Pdcd1lg2	5.9094	2.31254	1.44e-29	1.79e-27
Grem1	-3.92172	3.47005	1.61e-29	1.97e-27
Fyn	1.23309	5.77637	1.71e-29	2.07e-27
Ptpre	1.05213	7.35479	2.25e-29	2.7e-27
Smg5	1.04	5.21035	2.5e-29	2.97e-27
Col6a3	-3.28886	1.88554	2.66e-29	3.14e-27
Fam20c	1.25228	8.864	3.86e-29	4.51e-27
Map2	3.95231	1.8553	6.67e-29	7.73e-27
Fosl2	1.08346	5.42096	1.4e-28	1.61e-26
Nabp1	1.50587	7.37913	1.76e-28	2e-26
Cd52	1.09393	6.87449	1.8e-28	2.03e-26
Col5a1	-3.73387	1.75846	2.24e-28	2.51e-26
Awat1	3.1732	1.92446	2.71e-28	3e-26
Pdia4	1.41531	7.31943	3.9e-28	4.28e-26
Pdgfa	1.12896	4.41598	4.79e-28	5.22e-26
Irf4	3.13722	1.71458	9.94e-28	1.07e-25
Prrx1	-3.34691	1.77054	1.14e-27	1.22e-25
Gm8113	3.01752	2.59059	1.3e-27	1.38e-25
Ksr2	1.78795	4.41879	1.36e-27	1.43e-25
Il31ra	6.17504	0.624876	1.45e-27	1.51e-25
Sestd1	0.871918	6.73778	2.42e-27	2.51e-25
Cd9	0.947418	8.79026	3.32e-27	3.41e-25
Gm48274	-2.91779	3.25422	4.38e-27	4.47e-25
Nid1	-2.56684	2.55412	4.76e-27	4.82e-25
Cd274	1.27136	7.85845	1.24e-26	1.25e-24
Smap2	1.58398	7.7718	1.25e-26	1.25e-24
Zcchc2	1.06993	6.33886	2.2e-26	2.17e-24
Tead1	-3.18841	1.50087	2.52e-26	2.47e-24
Cln5	0.93056	6.8786	2.79e-26	2.72e-24
Pdgfra	-4.35792	1.07482	2.84e-26	2.75e-24
Rab3il1	1.04584	7.35099	3.68e-26	3.53e-24
Htr2a	2.41323	2.67493	6.21e-26	5.92e-24
Chil3	3.64045	7.43136	6.53e-26	6.17e-24
Vgll3	-3.52667	1.32261	6.65e-26	6.24e-24
Ceacam19	3.34491	1.83037	7.67e-26	7.15e-24
Slc7a11	1.56062	4.92491	1.02e-25	9.47e-24
Tlr2	-1.73502	4.15825	1.28e-25	1.17e-23
Olfm1	1.60715	2.93122	1.71e-25	1.56e-23
Clec12a	-1.02937	8.26778	1.83e-25	1.66e-23
F630028O10Rik	-1.78491	4.45368	2.05e-25	1.85e-23
Thbs2	-5.33816	0.410549	3.04e-25	2.72e-23
Stt3b	0.970162	7.84016	3.34e-25	2.97e-23
Abcd2	1.18309	5.59001	3.61e-25	3.18e-23
Rrp8	1.07065	4.86911	9.99e-25	8.74e-23
Cdh2	-3.51677	0.97824	2.42e-24	2.11e-22
Ddr2	-3.16114	1.52131	3.33e-24	2.87e-22
S1pr1	-1.169	5.85014	3.43e-24	2.94e-22
Csf2rb2	1.00638	9.01771	5.93e-24	5.05e-22
Slc30a4	1.19565	5.029	6.55e-24	5.55e-22
Clec4n	-2.10088	4.7623	9.18e-24	7.72e-22
Pdgfrb	-3.91726	0.807059	1.1e-23	9.17e-22
Prss23	-4.07228	0.189827	2.13e-23	1.75e-21
Cd14	-1.68457	5.658	2.11e-23	1.75e-21
F10	2.0534	5.46361	2.45e-23	2e-21
Plekha3	0.884679	5.84186	3.77e-23	3.07e-21
Tifab	1.21371	5.57662	3.85e-23	3.11e-21
Grb10	-3.62592	1.05593	4.91e-23	3.95e-21
Egr2	1.56472	6.26503	6.51e-23	5.2e-21
P2ry14	1.14388	4.89649	6.94e-23	5.51e-21
Enah	-2.6062	1.833	7.45e-23	5.88e-21
Tnip3	1.11641	5.08363	9.62e-23	7.55e-21
Sema7a	-3.55601	0.821372	1.13e-22	8.81e-21
Pkdcc	1.9982	3.95298	1.23e-22	9.55e-21
Ccr1	0.953939	7.07629	1.27e-22	9.76e-21
Rnf150	-0.841737	6.9697	1.43e-22	1.09e-20
Bex1	2.60016	5.18846	1.46e-22	1.11e-20
Dio2	1.17697	5.85727	1.9e-22	1.44e-20
Dpysl3	-3.39267	1.08557	2.13e-22	1.6e-20
Gnb4	1.206	4.40797	2.5e-22	1.87e-20
Tmem144	1.0462	4.53738	2.54e-22	1.89e-20
Fermt2	-3.72085	1.14783	3.17e-22	2.34e-20
Jcad	1.48483	3.93815	4.03e-22	2.96e-20
Crim1	-1.44934	3.24131	6.43e-22	4.7e-20
Cdkn1c	1.24062	4.7397	7.19e-22	5.22e-20
Mrc2	-3.77037	0.577013	8.66e-22	6.26e-20
Rnase2a	7.49009	0.164065	9.4e-22	6.75e-20
Mrc1	0.992945	10.3665	1.34e-21	9.55e-20
Tpm2	-2.55847	1.80237	1.63e-21	1.16e-19
Ap2m1	0.98013	9.58124	2.22e-21	1.57e-19
Aff1	0.759609	7.61949	2.32e-21	1.63e-19
Ifit3	-2.26214	3.52301	2.54e-21	1.77e-19
Lama4	-3.59409	0.701202	2.62e-21	1.82e-19
Klf4	1.9681	2.5547	2.66e-21	1.84e-19
Atp6v0a1	0.772902	9.91095	2.98e-21	2.05e-19
Gm43305	-1.52685	8.38595	4.42e-21	3.02e-19
Ptx3	-3.38688	0.857672	4.67e-21	3.18e-19
Lpxn	1.07831	7.1046	4.95e-21	3.35e-19
Kirrel	-3.57563	0.883484	6.93e-21	4.67e-19
Cnn3	-2.51405	1.40775	7.62e-21	5.1e-19
C1qa	-1.42327	5.80802	7.84e-21	5.22e-19
Ptgir	1.6062	3.3543	9.16e-21	6.07e-19
Adra1a	-1.08906	5.60008	9.72e-21	6.41e-19
Klf9	1.2076	4.51033	9.87e-21	6.48e-19
Nfatc2	-1.06713	4.97704	1.31e-20	8.54e-19
Tanc2	1.1287	6.6343	1.34e-20	8.71e-19
P2ry1	1.36117	3.75415	1.52e-20	9.83e-19
Phldb2	-3.06395	0.762953	1.56e-20	1e-18
Id2	0.784843	7.32131	1.61e-20	1.03e-18
Pparg	0.832264	6.75421	1.8e-20	1.15e-18
Mxra8	-4.47963	0.298142	1.82e-20	1.16e-18
Pkp2	2.2974	3.12012	2.02e-20	1.27e-18
Fig4	0.754933	6.2663	2.67e-20	1.68e-18
Ptger2	1.51198	3.83192	2.71e-20	1.69e-18
Akap12	-3.4682	0.754014	4.7e-20	2.92e-18
Dcbld2	0.966709	4.78723	8.72e-20	5.39e-18
Cemip	-2.34726	1.49287	1.02e-19	6.26e-18
Fkbp10	-3.9736	0.355136	1.52e-19	9.33e-18
Rhov	0.97645	4.48897	1.89e-19	1.15e-17
Itgax	1.906	7.92756	2.05e-19	1.24e-17
F13a1	-1.89134	2.60583	2.25e-19	1.36e-17
Pcyt1a	0.736535	8.15673	2.67e-19	1.61e-17
Osmr	-3.70137	0.666859	2.95e-19	1.76e-17
Fgd6	0.895617	6.39513	3.81e-19	2.27e-17
Pi4ka	0.670147	7.21354	4.92e-19	2.91e-17
Smpdl3a	-0.679131	7.93256	9.03e-19	5.3e-17
5830432E09Rik	1.22435	3.07481	9.02e-19	5.3e-17
Itga9	-1.2138	3.53582	9.27e-19	5.42e-17
F7	1.40686	5.79488	1.57e-18	9.14e-17
Mylk	-2.42308	1.02403	1.73e-18	1e-16
Dnmt3aos	1.18613	3.66654	1.97e-18	1.14e-16
Actn1	0.661224	8.38978	2.15e-18	1.23e-16
Prkcd	0.842867	8.37878	2.26e-18	1.29e-16
Agpat3	0.799489	6.72631	2.6e-18	1.48e-16
Nyap2	3.20152	1.3227	2.86e-18	1.62e-16
Tmem202	1.16468	3.31271	3.45e-18	1.95e-16
Tm4sf19	1.52265	3.42711	3.54e-18	1.99e-16
Fgl2	1.50009	5.22207	4.73e-18	2.64e-16
Arrb2	-0.836578	7.03233	4.81e-18	2.67e-16
Focad	0.993194	4.36207	4.81e-18	2.67e-16
Fam3c	-0.728677	5.92055	4.96e-18	2.74e-16
Adamts2	-3.38807	0.429547	5.15e-18	2.83e-16
Plekhf1	2.39411	1.83338	5.53e-18	3.03e-16
Eif5a	0.740945	8.61226	6.55e-18	3.57e-16
Pxdn	-4.21465	0.166541	6.71e-18	3.64e-16
Gm6209	1.93002	2.3928	8.44e-18	4.56e-16
Slit2	-3.64168	0.567739	1.02e-17	5.5e-16
Irf1	1.17991	5.95844	1.1e-17	5.91e-16
Neo1	-1.85179	2.40619	1.13e-17	6.02e-16
Atf3	0.715519	9.09817	1.25e-17	6.62e-16
Serpinf1	-3.68443	0.62419	1.53e-17	8.08e-16
Aif1	-1.07585	4.92551	2.08e-17	1.1e-15
Sgsh	-0.766375	5.8519	2.1e-17	1.1e-15
Slc40a1	-0.932473	9.0802	2.18e-17	1.13e-15
Sash1	-0.644339	8.24698	2.16e-17	1.13e-15
Cep85	-1.08116	5.6832	2.23e-17	1.16e-15
Galnt6	0.684619	7.07473	2.25e-17	1.16e-15
Arl15	1.07542	3.66343	2.4e-17	1.23e-15
Mkl2	0.755642	6.92984	2.47e-17	1.27e-15
Pde3b	-1.29908	3.62473	2.62e-17	1.34e-15
Dlc1	-2.63679	0.958261	2.89e-17	1.47e-15
Cd302	-0.890883	5.17675	3.39e-17	1.72e-15
Sdc4	1.23481	7.71567	4.17e-17	2.1e-15
Mmp19	1.04287	6.66769	4.72e-17	2.37e-15
Ncf4	0.977395	6.14022	4.97e-17	2.49e-15
Amotl2	-3.28594	0.594867	5.31e-17	2.65e-15
Dclk1	-2.21764	1.58273	5.83e-17	2.89e-15
Dcstamp	2.70868	2.79559	5.94e-17	2.94e-15
Apol7c	3.94721	3.511	6.26e-17	3.08e-15
Esd	0.772641	8.81247	8.63e-17	4.23e-15
Tarm1	3.85531	0.5373	8.74e-17	4.28e-15
Sgk1	1.31229	6.44323	9.93e-17	4.84e-15
Stxbp3	0.94638	6.76954	1.11e-16	5.38e-15
Stk17b	-0.906352	5.93934	1.2e-16	5.82e-15
Ophn1	-0.739599	5.41106	1.35e-16	6.49e-15
Bmp1	-2.80198	1.05658	1.52e-16	7.29e-15
Cish	3.52905	1.28107	1.75e-16	8.36e-15
Thbs1	-2.58128	8.28412	1.91e-16	9.11e-15
Inhba	-2.41653	2.00546	2.21e-16	1.05e-14
Sh3pxd2a	-0.768659	5.03185	2.38e-16	1.13e-14
Cd44	0.695462	9.59052	2.99e-16	1.41e-14
Dse	0.592196	7.46958	3.37e-16	1.58e-14
Pim1	0.663125	5.98852	3.47e-16	1.62e-14
Wwp1	-0.920715	8.74733	4.62e-16	2.15e-14
Ahr	1.69964	2.80439	4.63e-16	2.15e-14
Pdk4	-2.91015	0.749849	5.76e-16	2.66e-14
Mmp13	1.16635	4.5217	5.83e-16	2.69e-14
Cela1	-1.21374	3.00659	6.15e-16	2.82e-14
Ahcyl2	0.658157	6.94366	6.2e-16	2.84e-14
Arhgap6	1.09697	5.5293	6.58e-16	3e-14
Ehd2	-2.35012	0.985467	6.86e-16	3.12e-14
Psmb10	1.35559	5.30115	7.36e-16	3.33e-14
Cp	-1.80647	2.07565	8.92e-16	4.03e-14
Timp1	-2.60946	1.71491	1.08e-15	4.84e-14
Msrb3	-3.5048	0.263218	1.19e-15	5.35e-14
Fos	-0.822858	5.51743	1.45e-15	6.48e-14
Ptpn14	-2.86717	0.751268	1.48e-15	6.6e-14
Emp1	0.652128	9.21072	1.66e-15	7.38e-14
Selenop	-1.08064	11.9782	1.92e-15	8.49e-14
Pla2g5	3.06985	1.05076	1.97e-15	8.67e-14
Pdia6	0.70582	7.56575	1.99e-15	8.72e-14
Mfge8	1.69659	9.19032	1.99e-15	8.72e-14
Tmem176a	-1.73762	2.10336	2.16e-15	9.43e-14
Ms4a4a	1.47675	6.72868	2.18e-15	9.48e-14
Serpine2	-1.71723	3.63392	2.67e-15	1.16e-13
Plcl2	-0.612992	5.72605	3.14e-15	1.36e-13
Rpn1	0.630029	7.5927	3.34e-15	1.44e-13
Ccl7	2.66573	4.7692	3.51e-15	1.51e-13
Actr1b	0.636507	6.43042	3.75e-15	1.6e-13
Aldh1b1	1.07886	4.13324	4.51e-15	1.92e-13
Plekhg3	-0.730449	4.9134	4.94e-15	2.1e-13
Ahnak	0.743125	10.726	5.8e-15	2.46e-13
Lmna	0.831076	7.81163	5.86e-15	2.47e-13
Pcid2	0.699146	4.91968	6.09e-15	2.56e-13
Tfec	0.712984	5.18348	1.04e-14	4.35e-13
Mmp27	-0.739922	5.15435	1.05e-14	4.4e-13
Hbegf	1.22941	2.68047	1.07e-14	4.45e-13
Oit3	1.05555	4.04642	1.12e-14	4.63e-13
Gm4316	-1.25852	5.60803	1.12e-14	4.64e-13
Tmem176b	-1.49837	2.96494	1.31e-14	5.41e-13
Sorbs3	-1.24605	3.03636	1.34e-14	5.49e-13
Gpr183	1.17626	3.73035	1.45e-14	5.96e-13
Limd2	-0.869587	5.21648	1.48e-14	6.04e-13
Ocstamp	3.59415	0.460972	1.5e-14	6.12e-13
Ly86	-0.968313	5.0471	1.52e-14	6.17e-13
Stac2	0.776917	5.24357	1.53e-14	6.2e-13
Ptprd	-4.43073	0.133644	1.6e-14	6.46e-13
Loxl1	-3.38313	0.38689	1.65e-14	6.62e-13
Plod2	-2.04342	1.78572	1.68e-14	6.73e-13
Cttn	-1.03545	3.89635	1.74e-14	6.91e-13
Iqgap2	-0.89153	6.3014	1.73e-14	6.91e-13
Enpp2	-2.77606	0.811514	1.79e-14	7.12e-13
Nfkbiz	-2.26496	1.52447	1.89e-14	7.47e-13
Lhfp	-2.94418	0.829651	1.96e-14	7.73e-13
Tspan5	0.849591	4.80008	2.16e-14	8.48e-13
Parva	-2.37664	1.21618	2.37e-14	9.29e-13
Slc39a6	0.627605	6.96725	2.6e-14	1.02e-12
A530064D06Rik	-1.54533	4.61202	2.95e-14	1.15e-12
Arhgef17	-2.47702	0.597001	3.43e-14	1.32e-12
Gab3	-1.0561	3.17465	3.41e-14	1.32e-12
Ncapg2	-0.977941	5.72586	3.39e-14	1.32e-12
Gda	1.0789	4.93	3.47e-14	1.34e-12
Ccdc80	-2.43529	1.03624	3.61e-14	1.39e-12
Lurap1l	-4.84125	-0.268425	3.79e-14	1.45e-12
Fgf7	-3.38303	0.367382	4.32e-14	1.65e-12
3110039I08Rik	-2.73283	0.873566	4.8e-14	1.83e-12
Vcan	-1.86711	1.58533	4.96e-14	1.88e-12
Smad3	-0.924793	3.63965	5.71e-14	2.16e-12
Gramd3	0.605193	5.22889	6e-14	2.26e-12
Apoe	-1.14566	11.9102	6.3e-14	2.37e-12
Klhl6	-0.903533	3.91475	8.18e-14	3.07e-12
B3gnt7	1.18581	2.89491	9.08e-14	3.4e-12
Bicc1	-3.97152	-0.101604	9.19e-14	3.42e-12
Tspan7	1.99863	1.77622	9.74e-14	3.62e-12
Serpinb2	-2.77314	0.700973	9.91e-14	3.67e-12
Slc25a37	-0.82341	5.09818	1.02e-13	3.75e-12
Slc7a7	-1.08878	4.29165	1.42e-13	5.21e-12
Dut	1.34504	3.77612	1.42e-13	5.21e-12
Gng2	-0.718532	7.30344	1.43e-13	5.24e-12
Abcg3	-1.15176	3.4387	1.45e-13	5.3e-12
Aoah	-1.08059	4.79754	1.52e-13	5.53e-12
Atic	0.52532	5.98112	1.52e-13	5.53e-12
Pacrg	1.21732	2.56741	1.62e-13	5.89e-12
Dlg3	0.848917	4.41409	1.83e-13	6.62e-12
Arl6ip5	0.579477	7.41586	1.97e-13	7.1e-12
Nfkbia	-0.850543	4.21434	2.14e-13	7.69e-12
Ddhd1	1.18055	6.6453	2.23e-13	7.98e-12
Mylip	-0.658593	6.1283	2.63e-13	9.41e-12
Ncam1	-3.16252	0.268735	2.74e-13	9.76e-12
Ddah1	-3.31792	0.0375469	2.86e-13	1.02e-11
Plxdc2	1.31467	4.86511	2.99e-13	1.06e-11
Lat2	0.655862	7.93289	3.02e-13	1.07e-11
Cacna1b	1.65392	2.07005	3.17e-13	1.12e-11
Gsap	-0.87424	3.98157	3.24e-13	1.14e-11
Camk1d	-0.639037	5.08772	3.43e-13	1.2e-11
Rars	0.712248	6.73259	3.72e-13	1.3e-11
Rbfox2	-1.53969	1.61402	3.94e-13	1.37e-11
Maf	-0.87541	8.42206	4.06e-13	1.41e-11
Ahnak2	0.747042	8.06728	4.68e-13	1.62e-11
Ghr	-2.8314	0.143858	5.17e-13	1.78e-11
Tex9	3.23616	1.19397	5.17e-13	1.78e-11
AC166110.3	-1.98102	3.15998	5.41e-13	1.86e-11
Cnr2	0.709508	5.38597	5.67e-13	1.94e-11
Nectin4	-0.850469	3.58635	6.82e-13	2.33e-11
Clec4a3	0.926822	6.89562	7.1e-13	2.42e-11
Tbx15	-4.58187	-0.224142	7.49e-13	2.54e-11
Timp3	-1.78817	1.78462	7.45e-13	2.54e-11
Etv3	0.62542	7.60292	7.69e-13	2.6e-11
Malt1	0.820052	5.7145	7.78e-13	2.63e-11
Matk	1.19223	4.75638	8.95e-13	3.01e-11
Tor3a	0.639911	6.03075	9.06e-13	3.04e-11
Rasgrp2	-1.26016	2.9841	9.14e-13	3.06e-11
Nfib	-3.29592	0.183658	9.55e-13	3.19e-11
Fam214a	-0.746212	5.17961	9.96e-13	3.32e-11
Fnbp1	-0.613452	7.32743	1.05e-12	3.49e-11
Fgd3	-0.57346	5.41245	1.05e-12	3.49e-11
Pfkp	0.624739	6.83595	1.09e-12	3.6e-11
Gpc4	-3.83107	0.0112125	1.19e-12	3.92e-11
Pde12	0.660861	5.05197	1.2e-12	3.94e-11
Oxct1	0.5553	8.00249	1.21e-12	3.96e-11
Fam129a	-0.677129	5.39683	1.25e-12	4.09e-11
Rhobtb1	-1.07489	3.29455	1.34e-12	4.39e-11
Sdf2l1	0.990869	5.95561	1.5e-12	4.88e-11
Ifrd1	0.604121	5.76751	1.51e-12	4.91e-11
Hyou1	0.588072	7.26818	1.52e-12	4.92e-11
Sulf1	-2.51908	0.589995	1.54e-12	4.96e-11
Pgm5	1.47539	2.01429	1.61e-12	5.18e-11
Gm20056	1.27165	2.93719	1.64e-12	5.28e-11
E330009J07Rik	0.955647	3.51812	1.65e-12	5.3e-11
Fcgr1	-0.729137	6.54593	1.67e-12	5.34e-11
Fcgr2b	1.37539	8.4764	1.92e-12	6.11e-11
Gm8221	7.29906	0.585601	1.93e-12	6.13e-11
Bcap31	0.551023	7.92205	2.1e-12	6.67e-11
Xylt2	-0.743054	6.26557	2.27e-12	7.21e-11
Adgrf5	-3.17171	0.28373	2.3e-12	7.28e-11
Slc36a2	3.80843	1.76815	2.41e-12	7.6e-11
Phospho1	1.49217	4.98787	2.61e-12	8.22e-11
Cybb	-0.696058	9.08789	3.06e-12	9.61e-11
Egfr	-2.07647	0.851848	3.26e-12	1.02e-10
Ptprg	-3.32595	0.0641374	3.5e-12	1.09e-10
Sntb2	-0.646323	5.47796	3.76e-12	1.17e-10
Slc2a1	0.642693	4.94248	3.95e-12	1.23e-10
Mitf	0.748057	7.26153	4.06e-12	1.26e-10
Tjp1	-2.76097	0.458578	4.17e-12	1.29e-10
Itga6	-0.929345	7.10398	4.25e-12	1.31e-10
Ptk7	-3.26673	-0.0989429	4.93e-12	1.52e-10
Slc17a5	0.512824	6.5594	5e-12	1.53e-10
Ercc6	0.676692	5.44937	5.15e-12	1.57e-10
Ldlrad3	0.870041	4.5741	5.12e-12	1.57e-10
Csrnp1	1.39092	2.52592	5.15e-12	1.57e-10
Alas1	0.666983	7.40816	5.23e-12	1.59e-10
Lat	1.34251	2.18633	5.44e-12	1.65e-10
Mpp6	0.679544	5.34956	5.64e-12	1.71e-10
Ms4a6c	-0.731135	6.55867	5.88e-12	1.78e-10
Rab19	1.02019	2.98285	5.92e-12	1.78e-10
Med13l	0.523959	5.84442	5.98e-12	1.8e-10
Fam129b	0.776622	9.6506	6.03e-12	1.81e-10
Dennd1c	-0.831465	4.29077	6.53e-12	1.95e-10
Lgals3	0.687835	12.2483	6.87e-12	2.05e-10
Traf5	0.956331	3.934	6.89e-12	2.05e-10
Tent5c	0.724061	5.01585	7.09e-12	2.11e-10
Ifit2	-1.56576	4.69825	7.3e-12	2.16e-10
Slc37a3	0.590125	4.98082	8.41e-12	2.49e-10
Pid1	-0.754537	7.22952	9e-12	2.65e-10
Gm15655	-0.941954	4.64827	1.07e-11	3.15e-10
Abca9	-1.12127	4.10593	1.09e-11	3.19e-10
Ric1	0.592667	6.02544	1.1e-11	3.22e-10
Serping1	-2.67384	0.75208	1.13e-11	3.29e-10
Clec4d	-0.588808	8.52478	1.33e-11	3.87e-10
Fgd2	-1.06334	3.67598	1.36e-11	3.96e-10
Tgfb2	-3.00776	0.13075	1.37e-11	3.98e-10
Yap1	-2.59205	0.484175	1.39e-11	4.03e-10
Slc35b1	0.646545	5.05459	1.41e-11	4.07e-10
Sdc1	1.18116	5.49	1.47e-11	4.22e-10
Tsc1	0.509868	6.23873	1.49e-11	4.29e-10
Slc16a9	-1.35119	2.75691	1.55e-11	4.44e-10
Ssh2	-0.869563	4.02137	1.55e-11	4.44e-10
Actg2	-3.00034	-0.295413	1.58e-11	4.52e-10
Nav2	0.594763	6.76451	1.64e-11	4.66e-10
Dbn1	-3.37853	-0.262367	1.66e-11	4.7e-10
Nr4a1	-2.01756	0.754994	1.66e-11	4.7e-10
Dbp	-1.09876	3.53192	1.74e-11	4.91e-10
Rras2	1.18586	3.63709	1.77e-11	5e-10
Ptger4	-0.968227	2.63119	1.85e-11	5.21e-10
Mapkapk3	0.817431	5.8433	1.95e-11	5.47e-10
Ogn	-4.58956	-0.206507	2.06e-11	5.78e-10
Prps1	1.18164	3.80816	2.36e-11	6.59e-10
Gpx8	-3.09499	-0.218457	2.47e-11	6.89e-10
Slc30a1	0.706635	7.48009	3.34e-11	9.29e-10
Gng11	0.758967	4.08101	3.34e-11	9.29e-10
Hnrnpll	0.515715	6.57447	3.45e-11	9.57e-10
Efnb2	-2.26979	0.197254	3.58e-11	9.9e-10
Kif3a	-0.701482	6.4468	3.71e-11	1.02e-09
Ly9	0.579292	8.40533	3.73e-11	1.03e-09
Ctla2b	-1.69863	3.69376	3.87e-11	1.06e-09
Flnb	-0.870343	4.83029	3.85e-11	1.06e-09
Postn	-1.58878	2.10228	3.94e-11	1.08e-09
Clec7a	1.01045	10.0509	3.96e-11	1.08e-09
Slfn8	-0.702596	5.13907	4.01e-11	1.09e-09
Map1b	-2.30317	0.593646	4.11e-11	1.12e-09
Pcdh1	-3.38816	-0.303562	4.25e-11	1.15e-09
Slc15a3	0.647419	8.88906	4.38e-11	1.19e-09
Ptpn22	-0.758133	4.75094	4.5e-11	1.22e-09
Ddx60	-1.06342	3.65323	4.74e-11	1.28e-09
Cnn2	-0.688081	4.32937	5.18e-11	1.39e-09
Scube3	-2.94882	0.328069	5.24e-11	1.41e-09
Secisbp2l	0.577026	7.70746	5.42e-11	1.45e-09
Cfh	-1.20257	4.77176	5.74e-11	1.53e-09
Nuak1	-0.970097	3.66728	5.79e-11	1.54e-09
Tmem158	1.46094	2.23174	5.84e-11	1.55e-09
Mcoln2	0.567017	5.98378	6.18e-11	1.64e-09
Etl4	-1.31269	3.25688	6.69e-11	1.77e-09
Wwtr1	-3.35426	-0.15989	7.2e-11	1.9e-09
Slc25a13	0.602858	5.76206	7.31e-11	1.93e-09
Rps6kc1	0.642853	5.48734	7.36e-11	1.93e-09
Gm14221	-1.75539	2.24586	7.69e-11	2.02e-09
Baiap2	0.683092	6.01268	7.79e-11	2.04e-09
Fat4	-3.07916	0.468466	8.36e-11	2.19e-09
Colgalt1	0.612401	7.95642	8.65e-11	2.26e-09
Fyb	-0.82023	8.40803	9.02e-11	2.35e-09
H2-DMa	1.11644	3.38773	9.38e-11	2.44e-09
B3galnt1	-0.687745	5.07249	9.68e-11	2.51e-09
Ctsc	-0.650467	6.7751	1.02e-10	2.65e-09
Fhl2	-3.25123	-0.198228	1.18e-10	3.05e-09
Camk1	-0.56344	6.50647	1.21e-10	3.11e-09
Dennd4c	0.509101	8.36516	1.26e-10	3.24e-09
Nlrc3	-0.894649	3.49721	1.27e-10	3.25e-09
Tspan14	0.671943	7.07794	1.46e-10	3.73e-09
Mfhas1	0.65803	6.19316	1.46e-10	3.74e-09
Pgam1	0.629967	8.94948	1.53e-10	3.91e-09
Dusp1	-0.641648	5.39126	1.74e-10	4.42e-09
Ccl3	-1.09902	5.54272	1.8e-10	4.58e-09
Tgfb1i1	-2.36275	0.492547	1.85e-10	4.68e-09
Ear2	2.4807	3.30921	1.89e-10	4.77e-09
Oas2	-1.47136	3.76676	1.92e-10	4.84e-09
Irgm2	-0.695581	4.78132	2.14e-10	5.38e-09
Ankrd55	1.27696	3.03644	2.14e-10	5.38e-09
Gm42428	-2.25888	3.39746	2.24e-10	5.62e-09
Tifa	-0.525859	5.85526	2.35e-10	5.88e-09
Fscn1	-1.7641	1.66307	2.44e-10	6.1e-09
Slc35f6	0.524601	7.288	2.49e-10	6.19e-09
Map3k5	-0.83976	3.41854	2.52e-10	6.25e-09
Ints6l	-0.743024	5.65095	2.52e-10	6.25e-09
Rbsn	0.538428	5.55536	2.72e-10	6.73e-09
Ryk	-1.24565	2.08457	2.78e-10	6.85e-09
Cd151	0.662018	6.22502	2.78e-10	6.85e-09
Mmp14	-1.40402	5.20938	2.85e-10	7e-09
Pfkfb3	-0.589904	5.99296	2.94e-10	7.22e-09
Gja1	-1.94345	2.07925	2.98e-10	7.29e-09
Inhbb	-3.68367	-0.357105	3.07e-10	7.51e-09
Hck	-0.538267	5.59318	3.16e-10	7.7e-09
Prps2	-0.542363	5.85282	3.17e-10	7.71e-09
Snx18	-0.513261	5.71726	3.21e-10	7.8e-09
Ifi206	-2.85751	0.945494	3.22e-10	7.81e-09
Ugdh	0.505248	6.7355	3.34e-10	8.08e-09
Fbxo32	-1.72084	4.84742	3.61e-10	8.71e-09
B4galt6	-0.687576	8.30318	3.83e-10	9.23e-09
Slc39a8	-0.804408	4.01013	4.13e-10	9.94e-09
Tmem268	0.668095	5.33655	4.14e-10	9.94e-09
Lcp2	-0.723489	6.45417	4.16e-10	9.97e-09
Nlrp3	-0.919508	3.65363	4.27e-10	1.02e-08
Fcrl1	-1.50803	1.56891	4.4e-10	1.05e-08
Galnt9	2.13286	0.901479	4.8e-10	1.14e-08
Il13ra1	-0.99263	3.99964	4.97e-10	1.18e-08
Oasl2	-1.0409	5.44914	5.04e-10	1.19e-08
Hpgds	-0.702152	8.41123	5.04e-10	1.19e-08
Sh3bp5	-0.605655	6.46082	5.33e-10	1.26e-08
Gas6	-0.743388	8.51688	5.51e-10	1.3e-08
Ier3	1.59028	3.87968	5.81e-10	1.36e-08
Snx6	0.521757	6.59654	6.24e-10	1.46e-08
Itgb8	2.24494	1.48388	6.65e-10	1.55e-08
Rasgrp1	3.30183	-0.0579356	6.85e-10	1.59e-08
Cdkn2aipnl	-0.585276	4.8375	7.61e-10	1.77e-08
Lrmp	0.53409	5.91146	8e-10	1.85e-08
I830077J02Rik	-1.21192	2.43525	8.21e-10	1.9e-08
Rel	0.591971	5.84611	8.44e-10	1.95e-08
Galnt10	0.582294	5.33561	9.54e-10	2.2e-08
Ddx58	-0.584463	5.08045	9.65e-10	2.22e-08
Abcg1	0.704858	8.63848	9.73e-10	2.23e-08
Gfpt1	0.509559	6.28392	9.83e-10	2.25e-08
Dusp18	1.09827	2.38818	1.01e-09	2.31e-08
Adgre4	-1.90892	1.54433	1.04e-09	2.38e-08
Sephs2	-0.521671	5.14972	1.06e-09	2.41e-08
Samd8	0.617712	7.26709	1.09e-09	2.48e-08
Mlxip	0.548649	6.38434	1.17e-09	2.65e-08
Ttc27	0.793737	3.8919	1.17e-09	2.65e-08
Epb41l3	-1.94789	3.45973	1.18e-09	2.66e-08
Slc45a4	-0.610874	5.6729	1.19e-09	2.68e-08
Litaf	0.54352	8.92067	1.23e-09	2.78e-08
Megf9	-0.612303	6.82065	1.26e-09	2.84e-08
Samd4	-0.753148	4.67287	1.27e-09	2.85e-08
Dip2c	-0.593585	4.57519	1.28e-09	2.86e-08
Robo1	-3.66466	-0.199734	1.3e-09	2.91e-08
Plek	0.647402	10.7226	1.33e-09	2.97e-08
Frat2	-1.56583	1.7527	1.38e-09	3.08e-08
Sdc2	-2.48805	1.09904	1.42e-09	3.16e-08
Nfxl1	-0.647975	4.42511	1.44e-09	3.2e-08
Castor2	-0.543619	5.9845	1.48e-09	3.29e-08
Cd300ld	0.8059	8.94879	1.5e-09	3.32e-08
Lrrc8b	0.600741	5.09276	1.57e-09	3.47e-08
Hk3	0.746223	8.64998	1.67e-09	3.68e-08
Ankrd13b	0.728905	3.76426	1.73e-09	3.8e-08
Calhm6	-1.63637	1.38078	1.86e-09	4.08e-08
Trpm2	-1.20038	1.99517	1.89e-09	4.14e-08
Trim36	0.869382	3.69671	1.93e-09	4.22e-08
Cd74	1.98627	7.24472	2.01e-09	4.39e-08
Il11ra1	1.03269	6.11504	2.06e-09	4.5e-08
Ccl12	2.27553	1.22062	2.08e-09	4.52e-08
Sat1	0.550733	8.88244	2.33e-09	5.04e-08
Zyx	0.582795	6.71762	2.43e-09	5.26e-08
Hvcn1	0.658425	7.69531	2.44e-09	5.27e-08
Gpr34	-1.27409	2.94797	2.55e-09	5.51e-08
Lif	-3.1893	-0.111831	2.6e-09	5.6e-08
Spcs2	0.504318	6.95622	2.63e-09	5.66e-08
Mgat1	0.866937	6.96623	2.68e-09	5.75e-08
Snai2	-3.15871	-0.0447453	2.74e-09	5.88e-08
Eml1	-3.40345	-0.311058	2.81e-09	6.02e-08
Wwc1	2.75823	-0.351681	2.9e-09	6.19e-08
Arap3	-1.10589	3.0921	3.16e-09	6.72e-08
Pdgfc	-0.86693	5.07048	3.28e-09	6.97e-08
Fhod1	-0.735329	4.45456	3.5e-09	7.41e-08
C1qb	-0.643646	9.45102	3.5e-09	7.41e-08
H2-Eb1	2.14602	4.92615	3.97e-09	8.38e-08
Tpcn2	0.570757	6.63424	3.99e-09	8.42e-08
Cst7	1.91721	1.34317	4.04e-09	8.51e-08
Large1	0.505191	6.00824	4.17e-09	8.77e-08
Cadm1	-1.9015	7.64211	4.22e-09	8.85e-08
Cdk18	0.55578	8.13131	4.3e-09	9.01e-08
Aifm2	0.718135	4.41917	4.32e-09	9.04e-08
Tbc1d16	0.806919	3.851	4.35e-09	9.08e-08
Fbxl4	-0.838522	3.45888	4.39e-09	9.15e-08
Apln	-2.40351	0.543224	4.47e-09	9.28e-08
Tusc1	0.756384	4.41865	4.47e-09	9.28e-08
B4galt5	0.562083	7.43999	4.55e-09	9.44e-08
Rhobtb3	-2.35047	0.246272	4.58e-09	9.48e-08
Chp2	-2.32951	0.300922	4.67e-09	9.66e-08
Cd59a	-0.882278	3.36536	4.75e-09	9.81e-08
Creld2	0.578588	4.49779	4.77e-09	9.83e-08
Fkbp9	-0.650803	4.49384	5.18e-09	1.06e-07
Jade2	-0.524029	6.4169	5.62e-09	1.15e-07
Gadd45b	0.557913	6.10588	5.71e-09	1.17e-07
Cdk5rap1	-1.0684	3.16169	5.84e-09	1.19e-07
4933439C10Rik	-1.2831	2.13001	6.08e-09	1.24e-07
Marcksl1	-1.29123	2.40537	6.38e-09	1.3e-07
Ciita	2.10894	1.85768	6.47e-09	1.31e-07
Cxcr3	-1.51126	1.49038	6.57e-09	1.33e-07
P3h3	-0.666789	3.66351	6.69e-09	1.35e-07
Rps6ka2	0.770353	4.64905	6.9e-09	1.39e-07
Il27ra	1.48165	1.46396	6.92e-09	1.39e-07
Mir99ahg	1.21548	2.55954	7.24e-09	1.45e-07
Ctsk	0.672304	4.98805	7.47e-09	1.5e-07
Syde1	-1.30243	1.94681	7.7e-09	1.54e-07
Map4k4	-0.59382	7.36843	7.92e-09	1.58e-07
Angpt2	-1.73045	0.773815	7.98e-09	1.59e-07
Cbl	0.53776	8.59511	8.28e-09	1.65e-07
Tgfb3	-2.6457	0.145024	8.35e-09	1.66e-07
Rnd3	-1.47268	1.7655	8.61e-09	1.71e-07
Prr5l	1.0701	2.4844	8.72e-09	1.72e-07
Adm	-2.66056	-0.125661	8.89e-09	1.75e-07
Dlg5	-1.36953	1.70879	8.85e-09	1.75e-07
Dock4	0.561733	4.98698	8.97e-09	1.77e-07
Nme1	0.562746	5.27524	9.38e-09	1.84e-07
Capg	0.679034	9.38409	9.42e-09	1.85e-07
Irf7	-1.37761	2.99697	9.97e-09	1.94e-07
Grpel1	0.505982	5.50779	9.95e-09	1.94e-07
Zdhhc14	-0.532582	5.16668	1.01e-08	1.97e-07
Epas1	-1.66475	5.20823	1.03e-08	1.99e-07
Plk3	1.23162	2.71947	1.02e-08	1.99e-07
Mfsd6	-0.615721	5.10863	1.05e-08	2.03e-07
Proz	0.976914	2.3121	1.06e-08	2.05e-07
Gm42793	-1.38601	2.01572	1.08e-08	2.09e-07
Lrp5	-0.56238	5.02616	1.09e-08	2.09e-07
Piezo1	0.531675	8.05898	1.08e-08	2.09e-07
Rhbdf2	0.668631	5.14166	1.09e-08	2.09e-07
Gngt2	-0.578016	6.09228	1.17e-08	2.25e-07
Endod1	0.517597	5.31611	1.19e-08	2.27e-07
Abca1	-0.806556	9.70992	1.24e-08	2.36e-07
Arl4c	0.601438	6.55884	1.25e-08	2.37e-07
Ifit1	-1.6301	2.8721	1.26e-08	2.39e-07
Dnah2	1.2118	3.10279	1.5e-08	2.84e-07
Tm4sf1	-2.48011	0.0246344	1.53e-08	2.89e-07
Slc12a4	0.617083	5.64178	1.54e-08	2.91e-07
Gbp9	-0.621239	4.19531	1.59e-08	2.99e-07
Tiam1	0.798156	3.83366	1.61e-08	3.02e-07
Marchf10	3.06745	0.131774	1.61e-08	3.02e-07
Olfml3	-2.63212	0.0461766	1.71e-08	3.19e-07
Errfi1	-0.708806	3.18452	1.71e-08	3.2e-07
Cx3cl1	-2.20459	0.145164	1.78e-08	3.32e-07
Dok2	0.545473	5.55147	1.79e-08	3.34e-07
Limk1	0.619601	4.68705	1.84e-08	3.43e-07
Psme2	0.663491	6.23835	1.87e-08	3.47e-07
Il18	-0.896479	2.9332	1.88e-08	3.5e-07
Snd1	0.534149	6.93995	2e-08	3.7e-07
Src	0.845464	4.41803	2.01e-08	3.71e-07
Glul	-0.7364	8.80017	2.02e-08	3.72e-07
Dhcr7	0.647126	4.85727	2.04e-08	3.76e-07
Il4i1	2.19289	1.04169	2.14e-08	3.94e-07
Vegfa	-0.648868	4.41745	2.15e-08	3.95e-07
Ifit3b	-2.29725	1.29763	2.22e-08	4.06e-07
Nupr1	-1.24257	1.98422	2.25e-08	4.13e-07
Cped1	-1.16132	2.32281	2.48e-08	4.52e-07
Gm15726	2.03797	1.90682	2.49e-08	4.53e-07
Cd72	0.518031	7.02335	2.55e-08	4.63e-07
Ighg2b	-3.67931	0.0631055	2.59e-08	4.68e-07
Rtp4	-1.0996	4.09902	2.62e-08	4.74e-07
Gm2115	-2.50783	0.115115	2.7e-08	4.88e-07
Slc8a1	-0.507418	4.87149	2.75e-08	4.95e-07
Map4k1	1.01323	2.60776	3e-08	5.39e-07
Il16	-1.06515	3.44433	3.02e-08	5.43e-07
Cd33	-0.984213	3.81716	3.16e-08	5.66e-07
Klhl33	1.82691	0.580737	3.19e-08	5.7e-07
Evi2b	-0.944824	7.65505	3.22e-08	5.74e-07
Serpinb1c	1.1909	2.54652	3.22e-08	5.74e-07
Cpd	-0.599868	7.6289	3.28e-08	5.83e-07
G530011O06Rik	1.52443	4.10143	3.28e-08	5.83e-07
Carmil1	-1.13557	1.70086	3.33e-08	5.91e-07
Epha2	-2.33582	-0.0982965	3.36e-08	5.96e-07
Septin11	0.511481	6.23118	3.56e-08	6.3e-07
Lpar6	-0.728236	5.14508	3.87e-08	6.83e-07
Chid1	0.595906	4.97183	3.93e-08	6.93e-07
H2-Aa	1.89268	5.61079	4.04e-08	7.1e-07
N4bp1	0.519678	6.13222	4.07e-08	7.13e-07
Arhgap28	1.02819	1.98601	4.2e-08	7.35e-07
Cd109	0.675264	5.32393	4.3e-08	7.52e-07
Pcp4l1	-1.2564	5.48386	4.63e-08	8.06e-07
Rcbtb2	-0.511568	7.3843	4.86e-08	8.45e-07
Rcn3	-1.85949	0.378026	4.9e-08	8.5e-07
Tarbp2	0.784257	4.15091	5.18e-08	8.97e-07
Mmp2	-1.68814	0.683565	5.19e-08	8.99e-07
Pilra	-1.40429	2.83438	5.27e-08	9.12e-07
Ptprn	1.04356	2.08303	5.65e-08	9.73e-07
Creb5	0.686151	4.5163	5.94e-08	1.02e-06
Ttyh2	0.535259	7.46508	6.08e-08	1.05e-06
Amotl1	-1.82816	0.797741	6.24e-08	1.07e-06
Ankle1	-1.34416	1.54058	6.47e-08	1.11e-06
Nsg1	-2.55559	0.221143	6.66e-08	1.14e-06
Nod1	-0.852275	4.09951	7.21e-08	1.22e-06
Nt5dc2	-0.84067	5.08334	7.19e-08	1.22e-06
Eya1	0.649694	5.68736	7.46e-08	1.26e-06
Col16a1	-2.97498	-0.0842902	7.54e-08	1.27e-06
Sulf2	-0.8029	6.57707	7.54e-08	1.27e-06
Cytip	0.634243	5.1736	7.65e-08	1.29e-06
Slc2a6	1.59783	1.56078	7.87e-08	1.32e-06
S1pr3	-2.3494	0.520629	7.93e-08	1.33e-06
Hfe	0.604735	5.80748	8.01e-08	1.34e-06
Rrs1	0.523548	4.69228	8.17e-08	1.37e-06
Mthfr	-0.571357	4.96593	8.32e-08	1.39e-06
Evi2a	-0.547566	7.46783	8.29e-08	1.39e-06
Tbc1d31	-0.794629	4.21214	8.6e-08	1.43e-06
Igf2bp2	0.621173	6.67585	8.58e-08	1.43e-06
Ifi44	-2.47525	0.655483	9.38e-08	1.56e-06
Ifi203	-0.711966	5.57055	9.53e-08	1.58e-06
Mx1	-1.67056	2.39989	9.77e-08	1.62e-06
Txndc11	0.513096	4.78455	9.95e-08	1.65e-06
Ston1	-2.40937	-0.0695559	1.01e-07	1.67e-06
Cgn	-2.2706	1.09168	1.02e-07	1.68e-06
C1qc	-0.602263	8.98753	1.06e-07	1.74e-06
Samhd1	0.564948	8.59643	1.07e-07	1.76e-06
Iigp1	-2.4345	0.865832	1.07e-07	1.77e-06
Gm11808	-4.14663	0.858616	1.1e-07	1.81e-06
Adamtsl5	0.672884	4.50306	1.1e-07	1.81e-06
Zfp467	-0.744885	3.68017	1.12e-07	1.83e-06
Slco2a1	-2.54418	-0.241308	1.16e-07	1.89e-06
Plscr4	-0.663	4.178	1.24e-07	2.02e-06
Mllt3	0.619459	3.77298	1.25e-07	2.03e-06
Spic	-1.14037	2.96325	1.26e-07	2.04e-06
Vat1	0.518692	9.98907	1.33e-07	2.16e-06
Apex1	0.546621	4.93281	1.4e-07	2.26e-06
Pmp22	-0.559094	8.76947	1.42e-07	2.3e-06
P2ry13	-1.34345	1.62595	1.45e-07	2.33e-06
Tusc3	0.591962	5.28138	1.53e-07	2.46e-06
BC021767	-2.11963	0.934083	1.55e-07	2.49e-06
Emp2	0.854144	3.84855	1.61e-07	2.57e-06
Vill	1.30588	2.12665	1.72e-07	2.75e-06
Igfbp4	-0.88817	6.4234	1.75e-07	2.79e-06
Exo5	0.584039	4.02134	1.75e-07	2.79e-06
Tmem47	-3.62948	-0.498169	1.82e-07	2.89e-06
Slc1a5	0.736382	4.43343	1.87e-07	2.97e-06
Thbd	-0.579529	4.27345	2.01e-07	3.18e-06
Serpinb6b	0.768665	4.99247	2.08e-07	3.28e-06
Galnt15	2.11812	-0.0450926	2.08e-07	3.28e-06
Dusp2	1.24515	2.20127	2.11e-07	3.33e-06
Bank1	-1.58409	2.21315	2.17e-07	3.41e-06
Smtn	-1.23172	2.11994	2.2e-07	3.46e-06
Slc25a5	0.509274	7.76737	2.27e-07	3.56e-06
Arhgap18	-0.512135	7.59387	2.28e-07	3.58e-06
Tapbp	0.605639	8.10811	2.36e-07	3.69e-06
Cxcl10	-2.50949	0.0587174	2.4e-07	3.74e-06
Synpo	-2.16199	-0.0570236	2.4e-07	3.74e-06
Zfp658	-1.30938	1.2587	2.41e-07	3.76e-06
Bcar1	-2.12384	0.0435185	2.44e-07	3.79e-06
Stab1	-0.746755	8.46488	2.44e-07	3.79e-06
H2-Ab1	1.82321	4.84049	2.52e-07	3.92e-06
Gnat3	1.25462	1.40917	2.54e-07	3.93e-06
Tfdp2	-0.642303	3.65558	2.55e-07	3.94e-06
Slc26a11	-0.538493	5.36542	2.63e-07	4.06e-06
Plxnd1	0.617692	7.98126	2.99e-07	4.6e-06
Adgra2	-1.54807	0.547096	3.02e-07	4.64e-06
Lpcat2	-0.849388	4.35144	3.02e-07	4.64e-06
Fabp4	0.769762	8.46783	3.04e-07	4.66e-06
Il1rl1	1.16379	1.68298	3.03e-07	4.66e-06
Dkk2	-1.75216	0.120577	3.06e-07	4.68e-06
Magi3	-0.80314	2.85382	3.16e-07	4.83e-06
Gm16287	0.964084	2.0675	3.2e-07	4.88e-06
Mpp7	-1.57356	2.58852	3.39e-07	5.16e-06
Ogfrl1	-0.696799	4.77204	3.53e-07	5.36e-06
Oasl1	-2.54146	0.822223	3.6e-07	5.46e-06
Ppp1r9a	-1.13627	2.25806	3.64e-07	5.51e-06
Sp100	-0.522239	6.05571	3.82e-07	5.76e-06
Gm7935	5.87855	-0.36094	3.82e-07	5.76e-06
Phf11d	-0.876163	2.72544	3.92e-07	5.89e-06
Pkib	-0.517038	5.22698	4.03e-07	6.05e-06
Armc7	0.547404	3.95709	4.15e-07	6.22e-06
Rilpl2	0.700265	6.15412	4.3e-07	6.43e-06
Poc1b	-0.58693	3.86607	4.35e-07	6.5e-06
Scimp	2.15816	0.421635	4.36e-07	6.51e-06
Pcdh7	0.940367	5.57302	4.49e-07	6.68e-06
Gm11879	1.28894	1.44429	4.6e-07	6.81e-06
Sh3tc1	0.636876	5.36448	4.93e-07	7.29e-06
Nfix	-0.604781	3.66258	5.35e-07	7.87e-06
Gm37376	-1.27982	6.25054	5.61e-07	8.23e-06
Ammecr1	0.669615	3.88715	6.16e-07	9.03e-06
P4ha2	-0.754344	3.21422	6.23e-07	9.11e-06
Mertk	-0.672941	7.86713	6.28e-07	9.17e-06
Slfn9	-0.906116	5.70882	6.33e-07	9.23e-06
Dmpk	-1.58356	0.973566	6.49e-07	9.44e-06
Kif26b	-2.33218	-0.429491	6.52e-07	9.47e-06
Lamb2	-1.57189	0.798701	6.55e-07	9.51e-06
Cdc42ep2	1.20249	2.09987	6.83e-07	9.9e-06
Atp6v1b2	0.575885	10.4757	6.85e-07	9.92e-06
Efemp2	-0.889006	2.77774	6.88e-07	9.96e-06
Daglb	0.631831	7.95584	7.04e-07	1.02e-05
A230050P20Rik	-0.860208	2.52534	7.69e-07	1.1e-05
Sipa1l3	0.538861	4.678	7.63e-07	1.1e-05
F5	-1.60658	1.39772	7.96e-07	1.14e-05
Stard13	-2.36559	-0.263759	8.3e-07	1.18e-05
9430025C20Rik	-1.48124	0.461713	8.26e-07	1.18e-05
Gm6377	-1.50539	2.59903	8.56e-07	1.21e-05
Gcnt2	-1.35778	0.866893	8.49e-07	1.21e-05
Gtf2a1	0.519714	7.17906	8.57e-07	1.22e-05
Adamts5	-2.57238	-0.0897397	8.73e-07	1.24e-05
Pgm2l1	-0.629418	5.19205	8.91e-07	1.26e-05
Ppargc1b	1.18645	1.46119	8.88e-07	1.26e-05
Itgal	-0.867625	2.89348	9.01e-07	1.27e-05
Havcr2	-0.668645	4.84111	9e-07	1.27e-05
Tfrc	0.644023	11.4052	9.22e-07	1.3e-05
Tmem132a	0.606387	6.80632	9.34e-07	1.31e-05
Hipk2	0.722291	7.48473	9.34e-07	1.31e-05
Basp1	-0.571146	7.6428	9.71e-07	1.36e-05
Trim24	-0.529226	4.08379	9.68e-07	1.36e-05
Fli1	-0.511761	6.23359	9.71e-07	1.36e-05
Nt5dc3	0.532608	5.50702	9.76e-07	1.36e-05
C3	1.03619	4.6419	9.68e-07	1.36e-05
Hnmt	-0.59008	4.33236	1.01e-06	1.41e-05
Firre	-0.51673	5.02444	1.01e-06	1.41e-05
Ppox	-0.584832	3.56015	1.03e-06	1.42e-05
Cd300c2	0.502018	7.71603	1.04e-06	1.43e-05
Nab2	0.551061	5.40734	1.05e-06	1.46e-05
Morc3	-0.565894	6.32604	1.06e-06	1.47e-05
Rdh13	0.597701	4.40332	1.07e-06	1.48e-05
Tlr9	-0.776454	3.1923	1.11e-06	1.53e-05
Folr2	-0.64094	5.9058	1.14e-06	1.56e-05
Ednrb	1.12858	5.58191	1.19e-06	1.63e-05
Igf1r	-0.530943	4.24348	1.21e-06	1.65e-05
Il2rg	0.576173	5.9157	1.23e-06	1.68e-05
Syt13	-1.67086	0.357683	1.25e-06	1.7e-05
Prl2c2	2.71231	0.115645	1.24e-06	1.7e-05
H2-Q6	-1.45901	0.917624	1.26e-06	1.71e-05
Lbr	-0.611086	4.52944	1.28e-06	1.73e-05
Slco3a1	-1.01294	1.65154	1.3e-06	1.76e-05
Pianp	-0.8502	4.93168	1.33e-06	1.8e-05
Enpp4	-1.78883	0.396906	1.35e-06	1.82e-05
Gm15760	0.995746	2.09372	1.38e-06	1.85e-05
Pilrb2	-1.80139	1.44482	1.38e-06	1.86e-05
Batf3	1.51924	1.87035	1.39e-06	1.86e-05
Tep1	0.505358	7.45739	1.39e-06	1.87e-05
Socs1	2.24168	0.912108	1.4e-06	1.87e-05
Arhgap29	-1.70799	0.819146	1.42e-06	1.89e-05
Pot1b	-0.638669	3.90873	1.46e-06	1.96e-05
Gpm6b	-2.12412	-0.0611062	1.49e-06	1.99e-05
Tnfrsf23	0.684201	3.74591	1.52e-06	2.03e-05
Rps6ka5	-0.760659	2.79955	1.55e-06	2.06e-05
Spaca6	-1.70386	0.445008	1.58e-06	2.1e-05
Auh	0.542485	4.33909	1.68e-06	2.22e-05
Sap25	-1.48385	1.93625	1.71e-06	2.27e-05
Fnbp1l	-0.622803	4.95798	1.75e-06	2.31e-05
Rhoh	0.619992	3.62871	1.79e-06	2.36e-05
Ctsh	-0.539831	8.30323	1.8e-06	2.37e-05
Ckap2	-1.07285	3.1907	1.81e-06	2.38e-05
Zfp90	-0.579963	4.62936	1.84e-06	2.42e-05
Lig1	-0.754843	4.89453	1.95e-06	2.56e-05
Jdp2	-0.75318	2.60009	1.98e-06	2.59e-05
Gm20605	-0.751607	4.55847	1.98e-06	2.59e-05
Napsa	0.620605	4.44549	1.98e-06	2.59e-05
Dst	-0.77076	4.32913	1.98e-06	2.6e-05
Trim30a	-0.508326	6.29409	2.05e-06	2.67e-05
Dusp6	-0.846942	4.3016	2.09e-06	2.72e-05
Dmxl1	0.558851	8.0661	2.09e-06	2.72e-05
Ak8	0.628829	4.4047	2.11e-06	2.75e-05
Kifc2	-1.28712	0.884526	2.16e-06	2.8e-05
Loxl3	-0.613686	4.20702	2.16e-06	2.8e-05
Nuak2	0.655087	4.75066	2.16e-06	2.8e-05
Olfml2b	-1.33385	0.757789	2.19e-06	2.83e-05
Tsku	-0.801241	2.77267	2.19e-06	2.83e-05
Tmem154	-0.790185	5.92477	2.2e-06	2.83e-05
Slc9a7	0.646248	3.46262	2.2e-06	2.83e-05
Klf8	0.797374	2.0878	2.23e-06	2.88e-05
Il1a	-1.0621	2.42619	2.39e-06	3.07e-05
Birc5	-0.902318	4.08453	2.39e-06	3.07e-05
Fmo5	-0.555126	3.73639	2.39e-06	3.07e-05
Cx3cr1	-2.32679	-0.151668	2.41e-06	3.08e-05
BE692007	-0.788773	3.84559	2.4e-06	3.08e-05
Gm30329	0.60475	3.75648	2.42e-06	3.08e-05
Dnajb14	-0.714466	7.07386	2.44e-06	3.1e-05
Wsb2	0.513946	7.6505	2.47e-06	3.14e-05
Pcyox1l	0.859742	2.7114	2.49e-06	3.16e-05
Mx2	-1.74718	0.368976	2.67e-06	3.37e-05
Gpr65	0.518033	6.54597	2.77e-06	3.48e-05
Ass1	0.908908	2.6284	2.78e-06	3.49e-05
Clec10a	0.854731	3.72311	2.8e-06	3.52e-05
S100a6	0.770829	6.57824	2.84e-06	3.56e-05
Mex3b	-1.39116	0.798362	2.89e-06	3.61e-05
Ms4a4c	-1.88987	0.484731	2.94e-06	3.67e-05
Tceal8	0.696964	6.32255	2.95e-06	3.68e-05
4930523C07Rik	-1.29562	1.03854	3.13e-06	3.89e-05
Mdm1	-0.931391	2.02418	3.19e-06	3.97e-05
Ccdc125	-0.737225	3.48779	3.28e-06	4.07e-05
H2-M2	1.44225	1.18497	3.31e-06	4.1e-05
Slc27a6	1.74736	0.0320689	3.31e-06	4.1e-05
Chst3	0.720436	2.27147	3.34e-06	4.13e-05
Ccnd3	-0.817174	3.82674	3.36e-06	4.14e-05
Xaf1	-0.776723	3.0977	3.36e-06	4.14e-05
Fam78b	0.738841	3.92393	3.37e-06	4.14e-05
Ifit1bl1	-2.02211	0.470866	3.4e-06	4.18e-05
Icosl	-1.60277	0.856149	3.41e-06	4.18e-05
Ltbp1	-1.05042	2.02263	3.47e-06	4.25e-05
Mfsd12	0.554627	8.75541	3.5e-06	4.29e-05
Adrb2	-1.23292	1.87608	3.54e-06	4.32e-05
Gm13509	7.84734	0.348339	3.53e-06	4.32e-05
Hspb6	-1.31087	1.47761	3.57e-06	4.36e-05
Atp6v0d2	0.612425	10.7964	3.57e-06	4.36e-05
Nop16	0.509207	4.03236	3.63e-06	4.42e-05
Cd28	0.586475	7.82847	3.66e-06	4.45e-05
Cebpb	0.760968	5.12202	3.65e-06	4.45e-05
Hectd2os	1.58714	1.44697	3.77e-06	4.58e-05
Glmp	0.504988	7.32287	3.92e-06	4.75e-05
Nxpe1-ps	-1.18298	1.37113	3.98e-06	4.82e-05
Tes	0.60163	4.8317	4.1e-06	4.96e-05
Myom1	-1.22672	1.40553	4.14e-06	5e-05
Tns2	-1.72705	0.262515	4.18e-06	5.04e-05
Rad51c	-1.51976	0.706171	4.26e-06	5.14e-05
Bmp2	-1.21631	1.60427	4.32e-06	5.19e-05
H2-T23	0.59122	7.15972	4.47e-06	5.36e-05
Cmpk2	-1.06265	3.82515	4.57e-06	5.49e-05
Ctla2a	-1.03536	2.17649	4.61e-06	5.52e-05
Pcolce	-1.17917	1.1268	4.68e-06	5.6e-05
Slc24a3	-0.986118	3.03431	4.74e-06	5.67e-05
Farp1	-1.56335	0.602113	4.96e-06	5.9e-05
Rgs2	-0.547479	7.09611	4.94e-06	5.9e-05
Sfmbt2	1.06569	1.26446	5.03e-06	5.99e-05
Palm	-0.972064	1.66202	5.14e-06	6.11e-05
Clmp	-1.39776	0.521402	5.32e-06	6.32e-05
Tuba4a	-0.601887	3.40975	5.34e-06	6.32e-05
Lancl3	2.07973	0.103137	5.5e-06	6.51e-05
Rsad2	-0.934896	5.47171	5.58e-06	6.59e-05
1700047I17Rik2	6.79135	2.46068	5.61e-06	6.63e-05
Cdr2	0.674876	2.64071	5.71e-06	6.74e-05
Tenm4	-1.49841	3.19644	5.74e-06	6.76e-05
Cep97	-0.666566	2.54225	5.79e-06	6.82e-05
Mid1	0.905956	5.78832	5.8e-06	6.82e-05
Frat1	-1.15477	1.23832	5.95e-06	6.99e-05
Prkaa2	1.38205	1.23454	5.94e-06	6.99e-05
Rab27a	-0.962917	2.09517	6.15e-06	7.2e-05
Phf11b	-0.881304	2.53406	6.14e-06	7.2e-05
Pyroxd2	-1.12015	1.50592	6.19e-06	7.25e-05
Gm44206	0.968551	2.0183	6.2e-06	7.26e-05
Atad2	-0.64095	5.82844	6.25e-06	7.31e-05
Ccdc88a	0.744121	6.96807	6.32e-06	7.37e-05
Ets1	0.653649	3.11485	6.51e-06	7.57e-05
Dmwd	-1.32333	1.03786	6.55e-06	7.62e-05
Itpk1	0.554933	4.51334	6.57e-06	7.63e-05
Irs1	-2.85546	-0.291404	6.72e-06	7.79e-05
Kcnn4	0.574294	5.80596	6.78e-06	7.85e-05
Klf11	-0.751806	3.26809	6.81e-06	7.87e-05
Cbx7	-0.899744	2.4582	6.85e-06	7.91e-05
Cyp27a1	-0.670294	4.92221	6.9e-06	7.96e-05
Meis3	-0.537163	3.66714	6.9e-06	7.96e-05
Pilrb1	-1.67714	0.834372	6.92e-06	7.97e-05
Mmp12	0.619978	11.2805	6.94e-06	7.99e-05
Retreg1	-0.523237	5.39821	7.14e-06	8.21e-05
Gprc5b	0.55167	3.99835	7.23e-06	8.3e-05
Ccnd2	-1.41563	2.99269	7.25e-06	8.32e-05
Susd1	-0.634774	3.17406	7.33e-06	8.39e-05
Mink1	0.51854	7.06756	7.36e-06	8.41e-05
Numbl	0.647011	2.96214	7.42e-06	8.46e-05
Gprc5c	0.88202	4.469	7.64e-06	8.69e-05
Ifitm3	-0.939218	5.09576	7.95e-06	9.01e-05
Jag1	-0.829039	3.63536	8.04e-06	9.1e-05
Dolpp1	0.548789	3.91379	8.14e-06	9.19e-05
F730311O21Rik	0.850386	2.91063	8.14e-06	9.19e-05
Iah1	0.599181	4.65965	8.16e-06	9.21e-05
Arhgap24	-0.569002	4.39784	8.67e-06	9.75e-05
Vangl1	-1.11119	1.0541	8.85e-06	9.93e-05
Snta1	-0.9466	2.41594	9.44e-06	0.000105461
Atp5g1	0.519135	4.93128	9.53e-06	0.00010643
Gm13431	1.12033	1.32592	9.84e-06	0.000109535
Vipr1	1.56002	1.20789	1.02e-05	0.000113685
Entpd4	-0.617962	4.15698	1.03e-05	0.00011408
Leng8	-0.553025	6.39295	1.07e-05	0.00011896
Ncapd3	-0.558366	4.45328	1.08e-05	0.000119218
Bmyc	-0.850298	1.86458	1.11e-05	0.000122065
Jsrp1	1.56528	0.33912	1.18e-05	0.000130332
Peli2	-0.595199	3.85936	1.21e-05	0.000133099
Pcgf2	-0.966625	2.01854	1.22e-05	0.000134554
Angptl4	-0.989111	4.34815	1.24e-05	0.000136369
Ablim1	1.82487	0.386228	1.27e-05	0.000139049
Cst3	0.504187	9.13969	1.29e-05	0.000141307
4930503L19Rik	-0.61307	4.29416	1.3e-05	0.000141478
Zfyve9	-0.693556	3.34192	1.33e-05	0.000144398
Rap1gap2	-1.14058	1.07241	1.36e-05	0.000147473
Amot	-0.990091	1.45688	1.37e-05	0.000148106
Gm35279	-1.43528	0.851921	1.37e-05	0.00014863
Cd86	-0.793876	3.18516	1.39e-05	0.00015076
Bnip3	-0.594986	3.97961	1.4e-05	0.000151542
Spred3	-1.0574	1.44497	1.41e-05	0.000152214
Rbpms	-0.902216	2.49155	1.41e-05	0.000152355
Rpl19-ps11	-5.8406	4.31162	1.47e-05	0.000158601
Npl	-0.542639	3.95687	1.47e-05	0.000158601
Gm16675	1.17514	0.7565	1.5e-05	0.000160637
Spn	-0.809108	3.02201	1.52e-05	0.000163675
Trim12a	-0.518422	4.05609	1.54e-05	0.000165234
Syne2	-0.890554	3.08158	1.56e-05	0.000166731
Irak3	-0.673008	4.27003	1.56e-05	0.000167124
Gm36161	-0.813064	5.72021	1.61e-05	0.000171658
Pi4k2a	0.518634	7.38657	1.66e-05	0.000176431
Hist2h2be	0.630046	2.87301	1.73e-05	0.000183456
Bmf	-0.852213	2.82178	1.75e-05	0.000185365
Gpr68	1.05296	1.32088	1.75e-05	0.000186138
Ptpn18	-0.704799	4.09812	1.77e-05	0.000187845
Mirt1	-1.38398	0.678702	1.79e-05	0.000189115
Ighm	-1.56634	3.96663	1.8e-05	0.000189564
Adam19	-1.53031	4.69881	1.82e-05	0.000192506
Sfxn5	-0.60743	3.27397	1.83e-05	0.000192631
Evl	0.503498	8.58412	1.86e-05	0.000196145
Fam124a	1.32049	2.03806	1.88e-05	0.000197354
Olfm4	-1.44636	0.920183	1.94e-05	0.000202849
Oas1c	-1.06908	1.20333	1.99e-05	0.000207562
Vmac	-0.751508	2.34364	1.99e-05	0.000208003
Aph1c	0.501058	6.98655	2.01e-05	0.000209568
Gm26588	1.62921	-0.0659219	2.05e-05	0.000213333
Ticrr	-0.92246	2.58931	2.13e-05	0.00022117
Csf1	-0.73889	4.7116	2.22e-05	0.00022944
Rabgap1l	-0.609474	3.9664	2.27e-05	0.00023445
2700081O15Rik	-0.760794	1.93478	2.34e-05	0.000241311
Clasrp	-0.518842	4.03629	2.36e-05	0.000243141
Sncaip	-1.50965	1.58584	2.37e-05	0.000244293
Shc4	-1.01443	1.47156	2.42e-05	0.000248343
Trim30d	-0.555374	4.47863	2.42e-05	0.000248343
Glis2	-1.69018	-0.153363	2.44e-05	0.000250483
Osgin1	0.860977	3.19039	2.49e-05	0.000254499
Brca2	-0.63785	3.37689	2.49e-05	0.000254659
Rab34	-0.618295	3.16345	2.56e-05	0.000260871
Mturn	-0.824353	2.59091	2.57e-05	0.000262094
Grk3	-0.797177	3.5087	2.58e-05	0.000262431
Ptgs2	-1.52014	-0.0181096	2.72e-05	0.000275808
Zfp532	-0.76231	2.53438	2.79e-05	0.000282391
Mtf2	0.510685	5.19637	2.8e-05	0.000283048
Dync2h1	0.547929	3.38154	2.84e-05	0.000286409
Col15a1	-1.29881	0.399644	2.92e-05	0.000293618
Ifi213	-1.9773	0.855205	2.93e-05	0.000294684
Kalrn	-1.47882	0.104114	2.97e-05	0.000298149
Heca	-0.520697	4.87641	2.99e-05	0.000299831
H2afv	-0.634959	3.84556	2.99e-05	0.000299864
Arhgef39	-0.989512	1.79034	3.02e-05	0.000302869
Traf3ip3	-1.03352	2.39092	3.07e-05	0.00030724
Slc25a25	0.511327	4.27309	3.11e-05	0.000310412
Spats2	-0.754839	2.7528	3.13e-05	0.000312242
Ralgps1	-0.694204	3.2398	3.16e-05	0.000315061
Slc2a3	-0.75753	2.35676	3.19e-05	0.000318009
Fmnl1	-0.568539	5.82785	3.22e-05	0.000320751
P2ry12	-1.46575	0.949187	3.23e-05	0.000321482
Phldb1	0.556525	2.85118	3.26e-05	0.000323229
Tmem178	0.974888	1.80486	3.3e-05	0.000326261
Sgo2a	-0.892082	3.75179	3.35e-05	0.000331799
Jade3	0.552655	3.76048	3.41e-05	0.000336523
9930111J21Rik2	-0.747246	7.21491	3.45e-05	0.000339269
Spp1	-0.724372	11.4337	3.46e-05	0.000340109
Cdc20	-0.850404	3.1319	3.49e-05	0.000343341
Rnasel	-0.503354	7.007	3.56e-05	0.0003492
Tceal9	0.607801	7.7041	3.6e-05	0.000352676
Pla2g15	0.551933	8.08711	3.7e-05	0.000360893
Gm37199	1.73115	0.014048	3.7e-05	0.000360893
Rab39	-1.59938	0.151796	3.83e-05	0.000373014
Sys1	0.651215	3.67502	3.89e-05	0.000378153
Tmem267	1.65975	3.02151	3.92e-05	0.000380398
Pfkl	-0.603843	4.4717	4.11e-05	0.000398045
Cdc42ep3	-0.549385	3.35532	4.18e-05	0.000403281
Cd320	0.789387	2.15552	4.2e-05	0.000405009
Gm6166	-5.3702	4.34821	4.29e-05	0.000413038
Mtss1l	-1.72867	-0.0169372	4.33e-05	0.00041713
Qdpr	0.543468	6.23012	4.37e-05	0.000420306
Htr2b	0.781968	3.70702	4.39e-05	0.000421791
Zfp36l1	-0.530301	6.22535	4.43e-05	0.000424518
Pcdh19	-2.0521	-0.257531	4.44e-05	0.000425527
Zmynd15	-1.11883	1.62249	4.5e-05	0.000430691
Ckap2l	-0.91408	4.107	4.5e-05	0.000430691
Nanos1	-0.924482	2.57253	4.53e-05	0.000432396
Egr3	-1.97943	-0.119108	4.56e-05	0.000435135
Scoc	-0.588188	5.15214	4.59e-05	0.000437347
Plxna4os1	-1.05428	1.35712	4.61e-05	0.000438483
D3Ertd751e	-0.762636	2.75396	4.74e-05	0.0004494
Adam33	-1.09524	1.16969	4.8e-05	0.000454645
2210406H18Rik	0.643208	2.97508	4.8e-05	0.000454645
Zbtb5	0.527333	3.5021	4.85e-05	0.00045799
Mndal	-0.737045	5.56672	4.95e-05	0.000467009
Gm15601	1.15022	1.7797	4.97e-05	0.000468287
Igtp	-0.538672	3.62522	5.09e-05	0.000478286
Dennd2c	-0.925153	2.35987	5.29e-05	0.000495804
Gm20412	0.950632	3.13354	5.34e-05	0.000500572
B3gnt5	0.899368	1.65025	5.42e-05	0.000506776
Mgp	-1.75168	-0.254004	5.43e-05	0.000507693
Filip1l	-0.819497	4.33858	5.66e-05	0.000526753
Hhat	0.915127	1.10411	5.67e-05	0.000527903
Pim3	0.844215	2.66651	5.74e-05	0.000533256
Acpp	1.1305	2.68001	5.94e-05	0.000550161
Lyrm9	-0.546349	2.87844	5.96e-05	0.000551124
4932422M17Rik	-0.844195	2.20935	5.96e-05	0.000551494
Fndc7	1.80041	0.118794	6.02e-05	0.000556221
Slc9a5	-1.22754	0.967677	6.06e-05	0.000559378
Mapk8ip1	1.27049	0.526651	6.09e-05	0.000561396
Gmppb	0.633907	3.61128	6.24e-05	0.000574893
Ier5l	0.908355	2.75721	6.47e-05	0.000594753
Ptgfrn	-0.511149	4.43532	6.51e-05	0.000597466
B830042I05Rik	1.08871	5.26092	6.67e-05	0.000611094
Gm26920	-6.25373	-0.342007	6.69e-05	0.000612616
Cyp4f16	-0.602276	3.53551	6.75e-05	0.000617735
Pltp	-0.631367	8.55222	6.81e-05	0.000622608
Nme2	0.570044	6.76516	6.92e-05	0.000631836
Ltb4r1	1.67007	-0.111847	6.92e-05	0.000631836
Usp18	-1.16543	1.94344	7.1e-05	0.000646593
Cdk2ap2	0.606449	4.33931	7.13e-05	0.000648413
Tmem86a	-0.534205	5.65226	7.49e-05	0.00067951
Dram1	0.522211	5.13879	7.52e-05	0.000682095
Nfia	-0.741151	2.36812	7.66e-05	0.00069329
Cd24a	0.770984	3.40465	7.75e-05	0.000700025
Vldlr	-1.2003	0.547224	7.81e-05	0.000705037
Tbl3	0.533367	4.14988	7.89e-05	0.000711249
Tpbgl	-0.8922	2.12088	7.94e-05	0.000715196
Ehhadh	-1.16081	0.600721	7.99e-05	0.000719133
Nr1d1	-0.864353	2.1194	8.03e-05	0.0007221
Teddm2	-1.76879	1.9753	8.13e-05	0.000729473
Gm48493	-6.52224	-0.268088	8.32e-05	0.000745521
Plcxd2	0.651256	2.51926	8.42e-05	0.000753517
Fam193b	-0.521316	4.14203	8.73e-05	0.000779227
Zc3h12a	0.544097	4.15958	8.73e-05	0.000779227
Htra1	-0.778242	2.18035	8.76e-05	0.000781403
Kank2	-0.595609	3.14069	8.97e-05	0.000798847
A230028O05Rik	0.69951	2.81555	8.99e-05	0.00079976
Ppbp	-1.19184	2.49916	9.01e-05	0.000801713
Ndc80	-0.794092	4.05423	9.03e-05	0.000802266
Il3ra	0.559329	4.26913	9.23e-05	0.000818354
Azin2	1.12233	1.16614	9.28e-05	0.00082214
Cxcl16	-0.558756	6.11055	9.41e-05	0.000833744
Psip1	-0.65047	4.45013	9.69e-05	0.000856045
Ska2	-0.836265	3.24069	9.74e-05	0.000859369
Ralgps2	-0.626909	2.76682	9.78e-05	0.000862577
Slc43a3	-0.715452	3.31692	0.00010138	0.000891826
Tln2	-1.37919	0.629576	0.000102848	0.000903504
Trex1	-0.620924	3.23116	0.000103035	0.00090453
Gpx3	-0.517917	5.40364	0.000106529	0.000932019
Spns1	0.578589	5.05666	0.00011094	0.000967979
Pdia5	0.970025	1.12323	0.000111345	0.000970197
Cdk20	0.511648	4.83655	0.000112895	0.000981709
Ddias	-0.806392	2.49614	0.000115097	0.000999499
Fam83f	0.766494	4.14935	0.00011619	0.00100764
Npy	0.585332	5.54831	0.000118439	0.00102438
Ahrr	0.787612	3.00468	0.000118826	0.00102703
Gm38166	0.681526	2.92598	0.000119327	0.00103066
Surf2	-0.531486	3.7739	0.000119557	0.00103127
Pdlim7	-1.00219	1.21982	0.00011989	0.00103345
Atl1	-0.807407	1.68866	0.000121146	0.00104358
Rab15	1.57333	-0.0113505	0.000121569	0.00104652
Vash2	-0.706885	2.11595	0.000122441	0.00105332
Epor	-1.38623	0.577483	0.00012302	0.00105618
Hdac7	-0.608711	3.30249	0.000122862	0.00105618
Fam216a	-0.807231	2.19963	0.000123336	0.00105748
Kcnj16	1.0864	1.18289	0.00012841	0.00109879
Neil3	-0.829438	2.93749	0.000128948	0.00110193
Espl1	-0.683173	3.28358	0.000129321	0.00110438
Tapbpl	0.532046	3.99541	0.000129926	0.00110808
Car5b	1.06047	1.91499	0.000131083	0.00111646
Phf1	-0.576331	3.03287	0.000131659	0.00112063
Gm21742	1.65317	0.328561	0.000136654	0.00116007
Itgb7	0.803493	2.09209	0.000137534	0.00116677
Ccl22	1.48472	0.862818	0.000137804	0.00116829
Cenpe	-0.786179	5.32813	0.000138045	0.00116879
Tmem37	0.779094	3.99299	0.000140148	0.00118426
Gpr132	0.803105	1.97701	0.00014277	0.00120484
AI480526	-0.809043	2.17645	0.000145196	0.0012245
Cc2d2a	-1.02618	1.10248	0.000148304	0.00124826
Racgap1	-0.734952	5.1501	0.000148481	0.00124893
Egln3	-1.27177	0.390713	0.000148774	0.00125058
A130077B15Rik	-0.546188	3.81226	0.000149277	0.00125398
Clspn	-0.839243	4.28977	0.000149792	0.00125749
Ifi209	-0.67639	4.67235	0.000150323	0.00126112
Socs3	-1.60192	0.0726791	0.000151661	0.00127152
Lyzl4	1.15553	1.42885	0.000151907	0.00127275
Ttll1	-0.538922	3.13961	0.00015794	0.00131815
Stoml1	0.52242	3.88315	0.000161688	0.00134594
Mettl27	0.830141	2.37412	0.00016188	0.00134666
Ugt1a6b	6.23079	-0.268031	0.00016292	0.00135444
Slc39a12	0.604479	2.15687	0.000163635	0.00135862
D430020J02Rik	-1.0346	1.51945	0.000164793	0.00136648
Gdpd5	-0.55199	3.43763	0.000166777	0.00138024
Matn2	-1.11231	0.774152	0.000169122	0.00139517
Kif1a	-0.74191	2.79603	0.000169948	0.00140109
5830444B04Rik	-1.01519	1.57584	0.000171403	0.00141128
Ccl4	-0.713902	4.84134	0.000171712	0.00141209
Knstrn	-0.85286	3.69509	0.000172978	0.00142152
Cxcl14	-1.21058	0.742492	0.000173919	0.00142834
Usp35	-0.625128	2.59085	0.000175523	0.00143783
Ankrd13d	-0.712505	2.2364	0.000179561	0.00146998
Unc5b	-0.888233	1.68933	0.00018105	0.00148028
Rap1gap	-1.58022	0.223267	0.000182039	0.00148742
Adhfe1	1.09958	0.764088	0.000182631	0.00149115
Kif15	-0.752111	3.87785	0.000182902	0.00149163
Rhou	-0.754021	1.82545	0.000187131	0.00152033
2510009E07Rik	-0.571869	4.54443	0.000188611	0.00153139
Gm13237	-1.1849	3.18596	0.00019343	0.00156657
Pla2g2e	1.05706	1.01897	0.00019358	0.00156657
Ncaph	-0.765897	4.3441	0.000194525	0.00157246
Hjurp	-0.530072	5.51226	0.000196008	0.00158246
Iqgap3	-0.662813	4.35168	0.000198388	0.00160067
A930007I19Rik	1.04929	0.99588	0.000201262	0.00162284
Ifi205	-1.0244	2.39122	0.000202543	0.00163215
Cd300ld4	-1.61544	2.44958	0.000204071	0.0016424
Slc18a1	0.53882	3.67357	0.000213379	0.00171195
Nrgn	-1.26232	0.634219	0.000214987	0.00172271
Cdca2	-0.810736	3.19796	0.000214866	0.00172271
Jpt1	0.500021	6.66441	0.000216256	0.00173072
Marco	-1.29983	1.03154	0.000222582	0.00177913
Cd4	-0.845186	4.56581	0.00022764	0.00181843
Malat1	-0.805875	9.9845	0.000235929	0.00187998
Tnks1bp1	-0.5391	3.2084	0.000236705	0.00188499
Adgrl1	-1.44794	-0.010965	0.00023712	0.00188713
Top2a	-0.742866	7.06721	0.000242688	0.00192667
Cers4	-1.0501	1.05852	0.000244506	0.00193991
St3gal6	-1.38341	0.85478	0.000245349	0.0019442
Fgf11	1.13253	0.678329	0.000245287	0.0019442
Prc1	-0.684617	5.49132	0.000255267	0.00201658
Nynrin	-1.66487	0.417121	0.000260952	0.00205392
Ssx2ip	-0.661725	2.80214	0.000262909	0.0020668
9030025P20Rik	-0.56361	3.86549	0.00026333	0.00206883
Fancm	-0.525309	3.21452	0.000265589	0.00208277
Grap	0.972059	1.44371	0.00026926	0.00211027
Dhfr	-0.659632	3.81918	0.000271217	0.00212326
Uvssa	-0.51573	4.32011	0.000272005	0.0021279
Bco2	-1.05751	0.8306	0.00027925	0.00217927
Cenpk	-0.877257	2.12776	0.00028	0.00218317
Plk1	-0.783197	3.88025	0.00028009	0.00218317
Camk2a	0.850442	1.67275	0.000281114	0.00218983
Gramd4	0.660493	3.04237	0.000283702	0.00220731
Btbd19	0.627031	2.42619	0.000286285	0.00222338
Gm17251	-0.916555	1.00744	0.000289898	0.00224736
Lbp	-1.30384	0.670867	0.000294425	0.00227583
Acrbp	-0.849619	1.54033	0.000294455	0.00227583
Nrap	-1.16077	0.426318	0.000298307	0.00230422
Fam110c	0.796121	2.72335	0.000305227	0.00235202
Gm31374	-1.36786	3.7351	0.000307612	0.00236857
Serpinb1b	1.15457	0.592857	0.000307744	0.00236857
C130026I21Rik	-0.900597	1.80665	0.00031124	0.00239406
Fgf13	-0.963139	1.1666	0.000317863	0.00243812
Gm8989	2.35775	0.711119	0.000328822	0.00251576
Wdr89	0.569414	2.47337	0.000329376	0.00251849
Troap	-1.04038	1.62035	0.000332952	0.0025413
Mcm7	-0.522661	4.99431	0.000334747	0.00255349
Tonsl	-0.810866	2.265	0.000344488	0.00261693
Rcl1	0.529409	2.92172	0.000346276	0.00262896
Gm40723	1.19176	0.191856	0.000348493	0.00264267
Oip5	-0.876675	2.02445	0.000358255	0.00270712
Tle6	-0.643577	2.24958	0.000359092	0.00271185
Ttc32	-0.633599	2.18109	0.000361241	0.00272648
Zfp791	-0.976395	1.15788	0.000364736	0.00274802
Nusap1	-0.789653	4.47448	0.000365571	0.0027527
Zfp810	-0.606924	2.84537	0.000376336	0.00282879
9430038I01Rik	0.574361	2.72648	0.000383625	0.00287867
Pnisr	-0.590667	6.41507	0.000390248	0.00292087
Cenpf	-0.839132	4.59405	0.000393477	0.00294216
Adora2b	1.04599	1.46143	0.000396773	0.00296163
Cd300lf	-0.700497	3.96358	0.000402793	0.00299787
Ccl2	1.14336	4.79154	0.000403553	0.00300179
Sh3bp4	-0.630099	2.16874	0.000406844	0.00302452
Ace	-1.54863	0.0584151	0.000418115	0.00310114
Sardh	0.790983	2.31067	0.000420705	0.00311855
Rrm1	-0.506676	6.44942	0.000422696	0.0031297
Phtf1os	1.19735	0.734871	0.000425996	0.0031487
Hebp2	1.3279	0.359537	0.000426938	0.00315385
Rnh1	0.519199	7.68683	0.000429857	0.00317177
Sirpb1a	-1.01033	1.113	0.000430787	0.00317681
Nrcam	0.562585	4.41567	0.000433018	0.0031896
Agbl5	-0.795433	1.40195	0.000452251	0.00331986
Bcr	-0.580319	2.81969	0.000452144	0.00331986
Bdh1	1.20006	0.767085	0.000459481	0.00337101
Oas1g	-0.659107	3.44635	0.000460128	0.00337191
Kif20b	-0.736666	4.56497	0.000465425	0.00340104
Cdkn2c	-0.652241	4.25608	0.000467503	0.00341234
Gm5512	-0.623172	2.40227	0.000469893	0.00342785
Cenpv	-1.10772	1.165	0.000470237	0.00342841
Hirip3	-0.721264	3.18959	0.00047378	0.00345033
Neurl1b	-0.806816	1.71151	0.000479559	0.00348256
Ppfia4	-0.64299	2.7602	0.000480082	0.00348439
Gm29216	-4.36297	6.61795	0.000480749	0.00348726
Gabbr1	-1.03255	0.757099	0.000487706	0.00353374
Bub1b	-0.589252	4.46973	0.000488014	0.00353398
Zbtb16	-1.16025	0.792247	0.000488611	0.00353631
Letm2	-0.931741	1.26074	0.000490608	0.00354877
Igf2bp3	0.5994	4.70661	0.000501716	0.00361488
Pde3a	-1.50011	0.164522	0.000512493	0.00369047
Rogdi	-0.634598	2.38275	0.000516493	0.00371304
Olr1	1.59356	-0.233376	0.00052153	0.00374506
Pole	-0.628354	3.90226	0.000522235	0.00374803
Anln	-0.778631	4.99711	0.000528719	0.0037819
Izumo4	-0.900941	1.36066	0.000529026	0.00378199
Tnfrsf14	0.531318	3.60657	0.000535992	0.00382541
Pou3f1	1.11761	2.24134	0.000539479	0.0038439
Brip1	-0.626348	3.67774	0.000544199	0.00386896
Ankrd24	-0.636921	2.09694	0.000550379	0.00390211
Ing2	-0.505228	3.04728	0.000554108	0.00392422
Lmnb1	-0.663689	4.3549	0.000563994	0.00398764
E2f8	-0.703121	3.97611	0.000567451	0.00400736
Hacd1	-0.660556	2.01538	0.000569624	0.00401789
Cacnb1	-1.18953	0.701255	0.000576962	0.00405703
Mastl	-0.856185	3.72224	0.000579527	0.00407062
Il15	-0.502713	3.39997	0.000583747	0.00409355
Mid2	-1.74358	-0.241125	0.000593571	0.0041579
Cisd1	0.56986	4.1857	0.000594728	0.00416148
Olfr624	-0.853128	2.08029	0.000596624	0.00417248
Cdc45	-0.682167	2.91983	0.000602476	0.00420438
Prr11	-0.732852	4.25498	0.000606167	0.00422314
Zscan18	-1.01392	0.578786	0.000617183	0.00429523
Cntln	-0.624116	3.32373	0.000631319	0.00438649
Gm7160	0.929074	1.05584	0.00063203	0.00438906
Gm37168	0.707447	2.25787	0.000632543	0.00439025
Clec4e	-1.0629	1.94584	0.00064505	0.00446501
Laptm4b	-0.512775	2.7725	0.000651959	0.00451041
Ccdc18	-1.03003	1.17231	0.000671695	0.00463199
Fads3	0.532424	2.95225	0.000678503	0.00467393
Tgtp2	-1.62132	1.48599	0.000686749	0.00472283
Evi2	-0.524545	4.3512	0.000687071	0.00472283
Rnf17	1.40164	0.206363	0.000696096	0.00477721
Ebf1	-1.39628	0.00976765	0.000700174	0.00479417
Sfxn4	-0.898311	0.8569	0.00070338	0.00480923
Nuf2	-0.794478	4.14173	0.000720096	0.00490268
Rtl6	-0.641715	2.20116	0.000734247	0.00499374
Map3k15	-0.63775	2.45281	0.000736584	0.00500698
Acp5	0.820197	4.27769	0.000737942	0.00501356
Klra2	-1.60298	-0.0712927	0.000744451	0.00504753
Tnfsf13os	-1.10774	0.986843	0.000744352	0.00504753
Susd3	-0.524838	3.76386	0.000744512	0.00504753
Pdk2	-0.505661	3.14559	0.000743415	0.00504753
Fads2	-1.30172	1.35093	0.000755394	0.00511322
Ccnb2	-0.722655	3.93227	0.000756143	0.0051156
Cavin2	-1.40339	0.303023	0.000765593	0.00517409
Tmem150b	-0.883761	1.31727	0.000795437	0.00536451
Prim1	-0.640672	3.1229	0.000823902	0.00553038
Cntrob	-0.545673	2.33822	0.000831017	0.00557232
Asb2	-2.39818	-0.383344	0.000833809	0.00558522
Ifi27l2a	-0.684134	4.3218	0.000838433	0.00561164
Adcy6	-1.40207	0.785961	0.00084115	0.00562357
Trim30c	-1.06604	0.65282	0.000846768	0.00565043
Tk1	-0.550353	4.20572	0.000847499	0.00565043
S100a4	0.565204	6.38444	0.000860427	0.0057218
Scn1b	-0.668096	2.17265	0.000864387	0.00574516
Tmem38a	-0.754469	1.71785	0.000878516	0.00582702
Cd38	-1.19751	2.18003	0.000887647	0.00587849
Fignl1	-0.674567	3.78572	0.000909235	0.00600291
Adam12	-1.4475	0.144846	0.00091321	0.00602295
St8sia4	0.551731	6.74298	0.000914561	0.0060257
Miga1	-0.510998	3.31326	0.000925963	0.00609458
Macrod1	-0.631349	2.24082	0.000940745	0.00617607
Gp1ba	-0.966662	1.41821	0.000943179	0.00618574
Zfp229	-0.712866	1.72108	0.000949419	0.00622031
Gm16712	-1.18512	0.418373	0.00095244	0.00623598
Fcgrt	-0.500715	6.17675	0.00095278	0.00623598
A230072C01Rik	-1.04858	0.377575	0.000956197	0.00625198
Zc3h8	-0.805103	1.74755	0.000956974	0.00625388
Ehbp1	-0.582502	2.52621	0.000959093	0.00626455
Gm47863	-1.26795	0.136363	0.000961255	0.00626911
9130019O22Rik	-0.644696	2.13821	0.000982472	0.00639129
5830415G21Rik	1.14542	0.897544	0.000989653	0.006425
Gm45551	-0.690725	2.59273	0.000999823	0.00648121
Ryr1	1.44467	0.180836	0.00100215	0.00649302
Nudt14	-1.04967	3.67918	0.00100391	0.00650118
Pcyt1b	-0.944215	1.02442	0.00100979	0.00653106
Stxbp4	-0.56976	2.26871	0.00101005	0.00653106
Gp5	-1.37526	0.0044055	0.00102337	0.00661382
Gm26811	0.974907	1.47471	0.00102808	0.00663761
Ngp	-0.674141	5.24547	0.00103637	0.00667775
AC130815.2	-0.913414	0.770661	0.00103732	0.00668054
Mapk11	-1.03672	0.866679	0.00105153	0.00676525
Cit	-0.821317	3.56035	0.001058	0.00680347
Psrc1	0.584477	2.08933	0.00106141	0.00682195
Gm10031	4.17668	1.82829	0.00106672	0.00684926
Arhgef10l	-0.501062	4.43295	0.00107968	0.00691246
Recql4	-0.998953	0.907496	0.00108242	0.00692589
Miga2	0.598544	2.89879	0.00110945	0.00707419
Fcna	-1.37018	2.49324	0.00111201	0.00708702
Zfp30	-1.21897	0.198557	0.00111826	0.00711271
Hoxb4	-0.665213	2.1099	0.00111955	0.00711514
Kif20a	-0.599393	4.85396	0.00111974	0.00711514
Nradd	-0.939342	1.02641	0.00112346	0.0071317
Ap1s2	-0.509461	6.91866	0.00113253	0.00717303
Plekhg5	-0.691061	1.52219	0.00114551	0.00723352
S100a8	-0.747891	5.22964	0.00114857	0.00724814
Pick1	-0.822424	2.63957	0.00115724	0.00729508
Ankrd26	-0.52426	3.58322	0.00115958	0.00729618
Sod3	-1.42262	0.229047	0.00117123	0.00735146
Cenph	-0.732742	2.1615	0.00117651	0.00738104
Ptchd1	-0.674568	2.52165	0.00118465	0.00742845
Mki67	-0.692185	7.52828	0.0011876	0.00744336
Kank3	-0.558552	3.01607	0.00119024	0.00745623
Pex16	0.563693	2.99875	0.00123233	0.00768999
Bach2os	-1.16748	0.858943	0.00123695	0.00771505
Bcl7a	-0.630613	2.26414	0.00127169	0.00791255
Kif5a	-0.789933	1.41073	0.00127245	0.00791345
Inpp4b	-1.29875	0.892937	0.00128942	0.00800734
C130013H08Rik	0.743455	1.62369	0.00130017	0.00806629
Hmmr	-0.647311	4.87752	0.00130155	0.00807098
Dlgap5	-0.668909	4.14654	0.00130547	0.00809142
Zfp493	0.563087	2.42758	0.00130614	0.00809163
Asb4	0.505712	3.06202	0.00133223	0.00823743
Gstm5	-0.917586	1.29875	0.00134661	0.00831833
Lin9	-0.519909	3.82436	0.00135608	0.00837281
Plcb4	-1.01028	0.477674	0.00137802	0.00849602
Elovl6	-0.51993	2.5794	0.00140749	0.00864868
Aspm	-0.678815	4.25531	0.00141226	0.00867389
Ctsf	-0.579337	2.94709	0.0014213	0.0087169
Gm37726	1.37542	0.126001	0.00142384	0.00872829
Uchl1	0.96628	0.766787	0.00142581	0.00873207
Abca13	-1.28195	-0.000289281	0.00143889	0.0088038
F730043M19Rik	-0.876564	1.1159	0.00147722	0.00901256
Xkr5	-1.45539	-0.0131163	0.00148193	0.00903702
Gm49450	-3.88685	4.28372	0.00149046	0.00908472
Cdiptos	-0.737153	1.58731	0.00150531	0.00916655
Penk	0.679165	2.35588	0.00155795	0.00945579
Gm4117	-0.763647	2.79517	0.00157646	0.00955457
Tmem254b	-0.567677	3.72021	0.00161227	0.00975781
Gm10222	-1.34333	7.14617	0.00161665	0.00977522
Xpa	-0.645149	2.99015	0.00161666	0.00977522
Gm37090	-1.43988	-0.0699574	0.00162844	0.00984182
Kif18b	-0.806735	2.49259	0.0016328	0.0098589
Sgo1	-0.774006	2.60921	0.00165214	0.00996359
Gm4739	-0.836602	2.99197	0.00166063	0.00999408
Pald1	-1.04133	0.616139	0.00167435	0.0100543
Stil	-0.768137	3.1002	0.00167858	0.0100691
Igkc	-1.68857	1.23844	0.00167968	0.0100711
Tnfsf10	-1.14315	-0.0210455	0.00169152	0.0101326
Hells	-0.623843	3.87396	0.00170334	0.0101844
Gm19918	2.3655	0.328109	0.00172589	0.0103001
Asb18	1.19786	-0.00443614	0.00174154	0.010379
Chd5	1.37943	-0.0616664	0.00178343	0.0105989
E2f2	-0.606063	3.06067	0.00180059	0.0106879
Asf1b	-0.572688	3.86742	0.00181082	0.0107421
Isg15	-0.687909	2.02332	0.00182297	0.0107943
Shld1	0.602938	3.9638	0.00183804	0.0108735
Gm11699	1.01838	0.779501	0.00187508	0.0110469
Gm48501	-1.45437	1.8451	0.0018904	0.0111219
Kif18a	-0.820078	1.99124	0.00192118	0.011272
As3mt	-0.843954	1.29809	0.00197687	0.0115724
Depdc1b	-0.926748	1.51408	0.00199274	0.0116441
Gm13135	-3.8144	1.05006	0.00202915	0.0118246
Lilrb4a	-0.642801	9.04126	0.00204459	0.0119092
Gm28424	1.26327	-0.104709	0.00204833	0.0119256
Nes	0.577804	4.92953	0.00207729	0.0120723
Mis18bp1	-0.619469	4.10701	0.00210362	0.0122088
Spata5l1	0.911443	1.16075	0.0021028	0.0122088
Dclk2	-1.11911	0.244008	0.00212258	0.0123022
Armcx4	-0.800072	1.13021	0.00212953	0.0123369
S100a9	-0.610432	5.67568	0.00213729	0.0123763
Kynu	0.90702	0.690872	0.0021544	0.0124473
Gm5086	-0.553609	2.20284	0.0021675	0.0125006
E230032D23Rik	1.06245	0.505283	0.00217965	0.012565
Nxn	0.760686	1.80536	0.00218372	0.0125772
Gm30285	1.77985	-0.0174686	0.00218372	0.0125772
Rrm2	-0.64532	5.2237	0.00222913	0.0128158
Gm45449	-0.732105	1.42125	0.00223022	0.0128163
Phf19	-0.774034	2.67539	0.00224823	0.0128967
Bmpr1a	-0.539552	2.36406	0.00224729	0.0128967
5930430L01Rik	-0.955889	0.335605	0.00225245	0.0129094
Tpx2	-0.535512	5.41	0.00226248	0.0129554
Uhrf1	-0.613338	5.08156	0.00227561	0.0130132
Sorbs1	-1.02702	0.957365	0.00229385	0.0131
Kif11	-0.640074	4.99481	0.00230173	0.0131275
Gm37390	-0.903831	1.06078	0.00230725	0.0131531
Gabbr2	-1.16738	0.876457	0.00231047	0.0131657
Spag5	-0.709084	3.78879	0.00232916	0.0132605
Pif1	-0.796054	1.66981	0.00234192	0.0133213
Marveld1	-0.554099	2.37117	0.00236135	0.0133904
Ube2c	-0.630021	4.05131	0.00237299	0.0134419
Tsacc	-1.00297	0.521892	0.00238557	0.013498
Chn2	-0.525814	3.25065	0.00238466	0.013498
Gm42674	1.34163	5.51819	0.00240276	0.0135713
Itga1	0.880715	0.985999	0.00242709	0.0136847
Alyref2	-0.636731	1.8951	0.00245297	0.0138246
Pcdhgc3	-0.541842	4.75084	0.0024641	0.0138752
Ggnbp1	-1.26027	0.418194	0.00247667	0.0139094
Bora	-0.549545	2.55561	0.00253076	0.0141637
Sult5a1	-1.09063	0.504615	0.00253821	0.0141825
Sirpb1b	-0.859303	1.90158	0.00254603	0.014212
Ddit4	-0.733148	1.20325	0.00254831	0.0142186
Spry2	-0.609899	2.80435	0.00256007	0.014278
Psmg3	0.519188	2.65083	0.00257445	0.0143396
Ccdc88c	1.09839	1.14703	0.00257749	0.0143478
Ldlrad4	0.586987	2.09967	0.00264124	0.0146671
Septin5	-1.42091	-0.0604737	0.00268248	0.0148193
Rhbdf1	-0.911919	1.19502	0.00267945	0.0148193
Olfr110	0.918098	1.00959	0.00267939	0.0148193
Kyat1	-0.838112	1.01492	0.00269188	0.0148521
Zfp991	0.589095	6.04653	0.00271553	0.0149447
AI504432	-1.01096	1.16272	0.00272324	0.0149802
Ccna2	-0.683441	5.45785	0.0027314	0.0150186
Sall2	-1.17607	0.235905	0.00273374	0.015025
Cdc7	-0.59168	2.6434	0.00274665	0.0150896
Eme1	-0.751156	2.0465	0.00275655	0.0151375
Pla2g7	-0.592119	6.75741	0.00276741	0.0151906
2900005J15Rik	-0.791837	1.0221	0.00278345	0.0152721
Mtmr7	0.988018	0.345071	0.00280388	0.0153777
Zfp456	-0.51757	2.35714	0.00284153	0.0155378
Gm21961	1.78243	0.509561	0.00285419	0.0155938
Syt8	-1.00905	1.15913	0.00286089	0.0156237
Gm9752	-1.08568	0.542782	0.00286435	0.015636
Gm45351	-1.3373	0.918752	0.00287396	0.0156818
Prrg1	0.673197	3.02332	0.00287858	0.0156937
Sez6l2	-0.742292	1.53084	0.00288695	0.015726
Adamts9	-1.32872	-0.0261297	0.00290866	0.0158192
Tnfsf13	-0.923995	3.22695	0.00291455	0.0158428
C030034L19Rik	-0.759183	1.3901	0.0029581	0.0160456
C1rl	-0.625586	1.54643	0.00298654	0.0161726
Nek2	-0.729055	3.45131	0.00301752	0.0162992
Kif22	-0.656281	3.46684	0.0030377	0.0163806
Foxm1	-0.658464	4.19606	0.00312196	0.0167981
Ttk	-0.691619	2.87041	0.00313492	0.016846
Gm18283	1.35854	0.086477	0.00313579	0.016846
Cenpq	-0.714119	3.09292	0.00316756	0.0169883
Cmklr1	-0.652736	5.05536	0.00317125	0.017001
Cdc6	-0.644776	2.81214	0.00317389	0.0170081
Cpe	-0.622148	4.70248	0.00329116	0.0175342
Pxylp1	-0.851344	0.919393	0.00329542	0.0175496
Gm6158	-2.87876	1.13401	0.00331116	0.0176189
Rac3	-0.781265	1.22305	0.0033726	0.0179088
4933430I17Rik	0.731189	1.25787	0.00337481	0.0179131
Hpgd	-1.45739	1.7056	0.00338056	0.0179362
Gm26674	-1.00116	0.888107	0.00338289	0.0179412
Eya4	-0.544397	3.21088	0.00338559	0.0179481
Ddb2	-0.655784	1.55315	0.00341222	0.01806
Cenpu	-0.59795	2.17747	0.00344632	0.0182025
Spry3	-0.957291	0.586847	0.00345262	0.0182283
Zfp503	-0.59923	2.23995	0.00353342	0.0185783
Nrm	-0.57016	2.94712	0.0035348	0.0185783
Pls3	-0.580164	4.21876	0.00360201	0.0189006
Rab3a	-0.795835	1.14941	0.00362789	0.0190054
Kiz	-0.500397	2.86291	0.00365096	0.0190952
Xlr4b	-0.898704	1.44067	0.00365954	0.0191322
Crip2	-0.988439	0.381851	0.00366937	0.0191681
Prkca	-0.563357	2.38447	0.00367609	0.0191876
Fkbp14	-1.01658	0.23943	0.00373091	0.0194264
AC139131.1	-0.701719	1.69868	0.00374546	0.0194864
Krba1	-0.840561	0.633818	0.0037489	0.0194964
Patj	1.0045	0.152775	0.0037768	0.0196111
Rnase6	0.90617	1.26704	0.00378156	0.0196266
Tcaf1	-0.869541	1.11276	0.00379348	0.0196805
Hsd3b2	1.14196	2.21518	0.003824	0.0198228
Nhsl2	-0.595113	2.44693	0.00383839	0.0198814
Bard1	-0.66011	2.70602	0.00386532	0.0200048
Srgap3	-0.721042	1.31262	0.00388247	0.0200532
Cep55	-0.625831	3.81467	0.00388697	0.0200603
E2f7	-0.645876	2.93273	0.00394206	0.0202876
Ptprf	-1.02169	0.303013	0.00398779	0.0204657
Gm4070	0.667206	6.6833	0.00398672	0.0204657
Arfgef3	0.583767	3.92715	0.00399215	0.0204695
Atat1	-0.52217	2.39667	0.00400011	0.0204858
Tns4	-0.790513	0.708256	0.00402268	0.0205627
St5	-0.976039	0.327782	0.00405164	0.0206779
Pbk	-0.672756	3.57256	0.00405032	0.0206779
Zfp108	-0.771755	0.877128	0.00415291	0.0211109
Cbarp	-0.868523	0.77695	0.00419137	0.0212644
Ttc39a	-0.843785	1.04012	0.00427281	0.0216264
Card11	-0.700054	3.62963	0.00427563	0.0216321
Kdr	-0.672584	2.00498	0.00429106	0.0216565
Pvt1	0.636735	1.599	0.00434004	0.0218548
Ercc6l	-0.610443	3.61532	0.00435492	0.0219212
Gm20712	-0.585664	2.36831	0.00438621	0.0220614
Srl	0.820227	1.03216	0.00439488	0.0220964
Cdca3	-0.616128	4.25777	0.00442896	0.0222243
Axl	-0.84274	5.85166	0.00445789	0.0223607
Acbd4	-0.551393	1.8542	0.00454463	0.0226987
Tagap	-0.62163	2.19293	0.00456257	0.0227704
Hspa1a	1.00431	1.16175	0.00473331	0.0234767
Neil2	-0.581447	1.77309	0.00476557	0.0235912
Hcn2	-0.814474	1.31496	0.0047702	0.0235996
Itga2b	-0.787065	1.79638	0.00477338	0.0236027
Gm48054	-1.22028	1.92976	0.00480186	0.0237161
Hist1h2bg	-1.10877	1.38482	0.00480702	0.0237325
Zfp692	-0.553363	1.99115	0.00487836	0.0240109
C130050O18Rik	-0.747485	1.31737	0.00492757	0.0242161
Gbp6	-0.923872	1.45933	0.00495992	0.0243471
Lgalsl	-0.73899	1.60681	0.00498422	0.0244478
Per3	-0.563048	2.12639	0.00498298	0.0244478
Gm3604	-0.89378	1.45945	0.00499018	0.0244677
Bub1	-0.685909	4.20462	0.00505725	0.0247331
Gbp3	-0.623593	3.09791	0.00505819	0.0247331
4933433G19Rik	-1.20078	-0.0352857	0.0050817	0.0248124
Plag1	0.687708	1.40727	0.00510301	0.024907
Gm49392	-1.22515	0.606201	0.00512163	0.0249694
Smpd5	-0.991111	0.285202	0.00520126	0.0252901
2010001K21Rik	-0.859091	1.06254	0.00519978	0.0252901
Gm13710	-0.816797	2.29611	0.00521442	0.0253215
Cdc25b	-0.521521	4.15647	0.00523264	0.0253856
Pimreg	-0.705958	3.15076	0.00524293	0.0254162
Mybl2	-0.6911	2.71193	0.00528428	0.0255878
Gm15513	-0.598455	2.32997	0.00534163	0.0258073
Gm45410	0.865468	1.01617	0.00533854	0.0258073
AC125351.1	-0.92913	1.03538	0.00536681	0.0258997
Dock3	0.662437	2.70795	0.00543047	0.0261578
Gm49378	-3.51682	0.34595	0.00554099	0.0266204
Knl1	-0.596966	4.02558	0.00554875	0.0266477
Xlr4a	1.59757	-0.0138727	0.00555632	0.0266679
Krt80	-0.900083	0.697182	0.00557927	0.026742
Eef1a2	-0.685125	3.96223	0.00563776	0.0269845
Ccne1	-0.560806	3.04703	0.00565263	0.0270456
Tedc2	-0.522484	1.78132	0.00565864	0.0270642
Dpy19l3	-1.07294	0.414309	0.0057	0.0272115
5930403N24Rik	0.686493	1.28329	0.00583393	0.0277376
Rgs11	-0.986957	0.0423524	0.00591582	0.0280543
Btg3	-0.94627	1.28712	0.00592724	0.0280878
Wdr35	-0.5979	1.45323	0.00594047	0.0281297
Maff	0.657563	1.39663	0.00593957	0.0281297
Dusp13	0.797312	0.522919	0.00594655	0.0281482
Gm17586	-0.620639	1.59329	0.00596005	0.0282017
Zfp934	-0.644725	2.77144	0.0060472	0.0285511
Adgra3	-0.582436	1.86051	0.00605273	0.0285667
Tcea2	-1.02409	0.220175	0.00606054	0.0285825
Cenpn	-0.593795	2.62063	0.006085	0.0286769
Cbx6	-0.663545	3.49031	0.00614791	0.0289415
Tmem120b	-0.511391	2.06009	0.0062436	0.0293276
Slc1a4	-0.856773	1.08143	0.00627338	0.0294398
Zfp583	-0.754112	1.01283	0.00632194	0.0296296
Trpc4	1.21929	-0.0912929	0.0063398	0.0296603
Gm20507	-1.6884	1.45124	0.00638177	0.0297916
Tufm	0.500369	5.06931	0.00641958	0.0299573
Ccne2	-0.736876	4.0899	0.00649704	0.0302529
Slc2a4rg-ps	-0.901956	0.602103	0.00658332	0.030579
F630040K05Rik	0.734124	3.23134	0.00658372	0.030579
Esco2	-0.78503	2.78529	0.00667316	0.0309386
Gm14325	-0.584091	3.26318	0.00675457	0.0312484
Mdga1	-1.00624	0.40022	0.00682	0.0314719
Insl6	0.549891	2.48043	0.00681926	0.0314719
Rtkn	0.823048	1.2659	0.0068701	0.0316349
Oas3	-0.61454	4.16287	0.00693616	0.0318707
Ndufaf2	-0.567649	2.73424	0.00701141	0.0321705
Trip13	-0.555883	2.63131	0.00706545	0.0323722
Tacr1	0.838367	1.5174	0.00718072	0.0328418
AC163032.1	-0.758779	0.754658	0.00720671	0.0329373
Cep72	-0.534922	1.86916	0.00724352	0.0330585
Amigo1	-0.590502	1.66715	0.00741578	0.0336536
Nmral1	-0.531339	2.62102	0.00741255	0.0336536
Zfp507	-1.1502	-0.153523	0.00746898	0.0338592
Spsb1	-0.771979	0.752032	0.00750783	0.0340233
Ctnnd2	-1.19087	0.273666	0.00755925	0.0342202
Ect2	-0.539433	4.19203	0.00764697	0.0345358
Ltf	-0.534582	4.39117	0.00770848	0.0347003
Bbs2	-0.507573	2.28958	0.00772768	0.0347381
Spata13	-0.646523	1.54535	0.00773728	0.0347635
Ankrd42	-0.914848	0.381687	0.00777356	0.0348824
Hdgfl3	-0.647279	2.95943	0.00780917	0.0350065
Treml4	-0.866432	1.09202	0.00782042	0.0350402
Cdk1	-0.501135	4.95552	0.00783657	0.0350658
Eef1akmt4	0.538948	2.54141	0.00788398	0.0352262
Srp54b	1.63036	4.08926	0.00792053	0.0353456
Acot1	-1.23452	0.381468	0.00793647	0.0354044
Dtl	-0.575168	3.52961	0.00805586	0.0358252
AC167363.2	0.720106	1.50187	0.00805343	0.0358252
Gm47155	-0.874774	0.391892	0.00821126	0.0363904
6720489N17Rik	-0.718385	1.86505	0.00822675	0.036434
Ska3	-0.736858	2.55755	0.00828413	0.0365983
Fanci	-0.611665	2.79791	0.00829761	0.0366343
Celf3	-0.95938	0.640051	0.00833807	0.0367252
Ehd3	-0.935603	0.639907	0.00836931	0.0368052
Lzts3	-0.707007	1.67759	0.00837067	0.0368052
Ptpn3	0.651889	1.27988	0.00838035	0.0368226
Gm14300	1.02051	1.17311	0.00839138	0.0368584
Ccnb1	-0.549829	4.58695	0.00840452	0.0368942
Gm17571	-2.32782	1.22191	0.0086077	0.0376543
0610040J01Rik	-0.806135	0.873067	0.00869433	0.0379816
Treml1	-0.554311	1.74472	0.00869871	0.0379878
Plekhh2	-0.644588	2.1245	0.00870438	0.037999
Zfp956	-0.618674	1.63359	0.00878044	0.0382409
Rrad	-1.12419	0.131411	0.00879358	0.0382726
4933411E06Rik	-0.840072	2.23695	0.00879796	0.0382726
Atp6v1g2	-0.632223	2.21463	0.0088026	0.0382726
Tube1	-0.689757	1.53635	0.00897842	0.0389448
Gm42688	-0.530018	2.02607	0.00899572	0.0389936
Gm49396	-0.788552	1.48167	0.00905468	0.0391963
Alox12	-0.912942	0.612018	0.00913326	0.0394303
Porcn	-0.813383	0.39791	0.00913217	0.0394303
Pask	-0.669357	2.00545	0.0091303	0.0394303
Stk26	-0.766916	0.779172	0.00913731	0.0394345
Akap6	1.02056	0.780584	0.00918192	0.0395872
Sell	-0.95908	1.24943	0.00920628	0.0396789
Gm21596	-0.551341	6.35984	0.00930295	0.0399884
Gm10767	-1.01783	0.0768203	0.00932726	0.040026
Hp	-0.800964	0.64665	0.00940248	0.0403084
Gpr19	-0.792969	0.919721	0.00945773	0.0404913
Efcab11	-0.775032	1.37729	0.00953708	0.0407901
Exo1	-0.705435	2.26819	0.0095402	0.0407901
Gm44103	-0.744272	1.44745	0.00967263	0.0413288
Fn1	0.626274	7.21052	0.00969522	0.0414115
A130071D04Rik	-1.24156	-0.123829	0.00970156	0.0414249
Gabre	0.984555	1.80931	0.00970642	0.0414319
Bbs10	-0.526899	2.40159	0.00976179	0.0416166
9130008F23Rik	0.833632	0.261342	0.00976264	0.0416166
Kif2c	-0.645953	3.58631	0.00978026	0.0416779
2900060B14Rik	-0.960499	0.308674	0.00981094	0.041781
Dab2ip	0.619161	1.34158	0.00987891	0.0420287
2900093K20Rik	1.03769	0.0634467	0.00991443	0.042138
Peli3	-0.597457	1.21297	0.00991988	0.0421472
Tnnc1	-0.940909	0.361435	0.00997787	0.0423516
Gm43900	1.18047	0.178415	0.010014	0.0424907
Paqr9	-1.23241	1.30362	0.0100813	0.0426779
Mok	-0.835799	0.736847	0.0100794	0.0426779
Gm44709	-3.53961	-0.434942	0.0101405	0.0428441
Ccdc15	-0.807638	0.594638	0.0103331	0.0435577
Slc18b1	-0.802615	0.984921	0.0104111	0.043843
Gm44792	-0.535475	4.14498	0.0104812	0.0440376
Phf11c	-0.797214	0.614712	0.0105445	0.0442456
1110002J07Rik	0.73711	1.2237	0.0105699	0.0443235
Hmgn5	-0.661622	3.09331	0.0106184	0.0444974
Lrig3	-0.947391	0.0539151	0.0107233	0.0448206
Adgrg1	-0.765393	0.838665	0.0107523	0.0449125
Gm42846	2.89373	0.0314698	0.0108491	0.0451847
Rad51ap1	-0.646995	2.83989	0.0109135	0.0453859
Vcam1	-1.39511	5.98628	0.0111084	0.0459815
Gm37917	0.59663	3.0232	0.0111169	0.0459871
Armcx2	-0.65478	1.39659	0.0111261	0.0459957
Melk	-0.59736	3.28662	0.0111633	0.0461198
Gm14401	-1.27501	-0.135475	0.0112482	0.0464108
Gm10704	-2.99843	2.05213	0.0112595	0.0464426
Gm37121	1.0211	-0.0592832	0.0112788	0.0465076
Gm47632	-1.02455	0.414287	0.0113848	0.0468994
Rmi2	0.818384	0.608716	0.011452	0.047146
Msrb2	-0.500511	2.04864	0.011475	0.0472258
Kif7	-0.869374	0.415058	0.0115643	0.0474855
Gm10557	1.1645	0.957962	0.0115677	0.0474855
Trim59	-0.595677	3.74284	0.0117537	0.0480804
Gm5615	0.950298	1.44874	0.0117641	0.0481076
E230016M11Rik	-1.01106	0.178406	0.0118239	0.0482824
Dennd6b	-0.668542	1.1127	0.0119468	0.0486998
2610507I01Rik	-0.618634	1.50302	0.0119817	0.0488113
Yes1	-1.03437	0.0905495	0.012021	0.0489248
Shcbp1	-0.589781	3.23688	0.0120707	0.0490495
Nptxr	-0.594187	2.22054	0.0121222	0.0492119
Pclaf	-0.559147	4.81935	0.0121657	0.049373
Gm17383	-2.1557	0.528446	0.0122125	0.0495318
mt-Th	1.39894	-0.11121	0.0122195	0.0495445
Fzd4	-0.971072	0.105125	0.0123136	0.0498319
Kifc1	-0.6179	3.58452	0.0124439	0.0502642
Gm36988	0.977013	0.157845	0.0126082	0.0508319
Gm4951	0.691917	1.63788	0.0127012	0.051127
Gm47567	0.725496	1.39823	0.0127395	0.0512651
Gm9614	-0.995926	1.18265	0.0127552	0.051287
Fancd2	-0.627979	2.89687	0.0128008	0.051415
Slc51a	1.1758	0.0856495	0.0129367	0.0518243
Cpne8	-0.85459	1.27461	0.0129531	0.051865
Ccdc189	-0.908719	0.0389099	0.013072	0.0521948
Pstpip2	-0.505464	2.86992	0.01316	0.0524508
Dhtkd1	-0.79184	0.50042	0.0132039	0.0525629
Nkain1	0.547846	2.86074	0.0134315	0.0532336
Rims3	0.571022	2.73726	0.013524	0.0534848
Macrod2os1	-0.890108	0.36627	0.0135669	0.0536051
Zfp418	-0.50751	1.39214	0.0136346	0.0538227
Orc1	-0.671119	1.53846	0.0137454	0.0542269
Cdnf	-0.978682	0.244433	0.0137759	0.0543211

## Sheet: Suppl Table 7
Supplementary Table 6. MK2 WT M2 macrophages vs MK2 KO M0 macrophages
	logFC	logCPM	PValue	FDR
Il1rl2	-3.1448	3.53289	1.92e-113	2.47e-109
Mgl2	-4.87074	4.07907	2.14e-104	1.35e-100
4930402H24Rik	-1.66267	6.61202	3.16e-104	1.35e-100
Wdfy1	2.02324	5.10257	1.91e-83	6.13e-80
Mcf2l	-2.9537	4.40442	5.44e-68	1.4e-64
Gm42429	-6.93984	3.78198	2.71e-64	5.82e-61
Sparc	-3.02633	3.58869	8.96e-64	1.65e-60
Retnla	-9.36132	5.10249	1.5e-63	2.4e-60
Slc7a2	-3.77877	5.75735	2.6e-63	3.72e-60
Lox	-4.07511	4.40795	1.62e-60	2.09e-57
Col5a2	-3.09351	3.36849	1.04e-57	1.22e-54
Fbn1	-3.68398	2.33594	8.62e-57	9.24e-54
Cemip	-3.93567	1.49287	8.85e-55	8.76e-52
Cyp1b1	-3.82804	3.46277	1.17e-54	1.08e-51
Kcnd3	-9.56655	2.27808	1.69e-54	1.45e-51
Tnc	-3.62662	3.19644	6.3e-54	5.07e-51
Ptgs1	-2.45217	4.88987	9.23e-53	6.98e-50
Hspg2	-3.37376	2.44379	1.43e-51	1.02e-48
Col12a1	-3.62241	3.49975	8.43e-51	5.42e-48
Ctgf	-2.92517	3.55425	8.28e-51	5.42e-48
Tmem26	-4.92313	5.8729	7.67e-50	4.69e-47
Arg1	-5.70783	2.3361	1.13e-49	6.59e-47
Col4a1	-2.22855	3.14464	3.01e-49	1.68e-46
Gm5345	-4.84991	1.35372	4.78e-48	2.56e-45
Bhlhe40	-1.97598	6.77824	2.78e-47	1.43e-44
Bgn	-3.04909	3.87792	5.94e-47	2.94e-44
Abcd2	-1.65247	5.59001	1.02e-46	4.85e-44
Scd2	-1.95619	7.01697	6.23e-46	2.86e-43
Aebp1	-3.33211	2.67707	3.22e-45	1.43e-42
Fn1	-3.77345	7.21052	1.13e-44	4.86e-42
F7	-2.28005	5.79488	5.04e-44	2.09e-41
Fat1	-3.12618	2.90095	2.96e-43	1.19e-40
Col6a2	-4.12372	1.62935	1.29e-42	5.01e-40
Col6a1	-3.68805	2.14588	1.82e-42	6.88e-40
Ksr2	-2.26077	4.41879	1.2e-41	4.39e-39
Serpine1	-2.6696	4.21846	2.55e-41	9.1e-39
Fam129a	1.27571	5.39683	3.18e-41	1.1e-38
Fstl1	-2.42732	3.00564	1.7e-40	5.76e-38
Acta2	-2.77367	3.67585	4.02e-40	1.33e-37
Cyr61	-3.187	2.40143	5.86e-40	1.88e-37
Nedd4	-1.99153	3.7808	1.44e-39	4.46e-37
Il6st	-1.19292	9.12077	1.46e-39	4.46e-37
Ddhd1	-2.17666	6.6453	1.54e-39	4.61e-37
Wdfy2	-1.12303	8.10095	2.02e-39	5.91e-37
Loxl2	-3.3327	2.58273	2.31e-39	6.61e-37
Cxcl12	-4.63773	1.90757	2.62e-39	7.33e-37
Dusp1	1.32774	5.39126	3.23e-39	8.85e-37
F10	-2.79601	5.46361	3.36e-39	9e-37
Gpc1	-2.4534	5.39138	2.28e-38	5.99e-36
Serpinh1	-3.07587	2.42114	2.46e-38	6.33e-36
Pou2f2	1.99339	4.69495	6.6e-38	1.67e-35
Fcgr2b	-2.59785	8.4764	2.44e-37	6.03e-35
Col1a2	-3.7505	3.98004	6.44e-37	1.56e-34
S1pr3	-5.81695	0.520629	1.43e-36	3.41e-34
Flrt2	-1.53406	7.39419	2.36e-36	5.53e-34
Bcar3	-1.18113	6.02421	3.7e-36	8.49e-34
Ms4a4a	-2.39181	6.72868	9.05e-36	2.04e-33
Antxr1	-2.79803	1.75655	9.93e-36	2.2e-33
Clec12a	1.22297	8.26778	5.04e-35	1.1e-32
Cdkn1c	1.5939	4.7397	7.58e-35	1.62e-32
Ptx3	-4.45879	0.857672	8.92e-35	1.88e-32
Csf1	-2.27173	4.7116	2.26e-34	4.69e-32
Nid1	-3.0024	2.55412	3.28e-34	6.7e-32
Gm8113	-3.46616	2.59059	1.27e-33	2.56e-31
Retreg1	1.40552	5.39821	6.41e-33	1.27e-30
Nfil3	-2.24392	3.68543	1.2e-32	2.35e-30
Lamb1	-3.17546	1.95924	6.05e-32	1.16e-29
Ltbp2	-3.09863	2.13822	6.7e-32	1.27e-29
Mmp19	-1.47139	6.66769	7.95e-32	1.48e-29
Myrf	-2.04856	4.36841	1.09e-31	1.99e-29
Chil3	-4.14531	7.43136	1.15e-31	2.08e-29
Col3a1	-3.33766	1.63637	1.75e-31	3.12e-29
Lsp1	2.25141	4.76678	1.77e-31	3.12e-29
Nek6	-0.930743	6.37065	1.92e-31	3.33e-29
Mapkapk2	-1.02813	6.45958	2.08e-31	3.56e-29
Cd14	1.97296	5.658	2.79e-31	4.73e-29
Clcn5	-0.990537	6.7031	3.11e-31	5.19e-29
Jak2	-1.44132	6.39809	3.7e-31	6.09e-29
Dclk1	-3.53383	1.58273	4.86e-31	7.91e-29
Dcn	-4.03167	1.72712	5.32e-31	8.56e-29
Sod3	-6.50079	0.229047	9.84e-31	1.56e-28
Nlrp3	1.67729	3.65363	3.21e-30	5.03e-28
Pdia4	-1.47098	7.31943	3.34e-30	5.18e-28
Rnf19b	-1.47069	6.58037	3.59e-30	5.5e-28
Cald1	-2.71367	4.0263	3.77e-30	5.71e-28
Enpp2	-4.0648	0.811514	4.16e-30	6.22e-28
Plekhg1	-1.85733	4.29346	5.7e-30	8.42e-28
Dpysl3	-4.06489	1.08557	5.87e-30	8.57e-28
Slc36a2	-7.62283	1.76815	2.41e-29	3.48e-27
Inpp5a	-1.23038	4.72155	2.62e-29	3.74e-27
Sema4d	1.04078	8.00176	6.47e-29	9.15e-27
Fchsd2	-1.28643	6.89383	6.98e-29	9.76e-27
Col1a1	-3.54289	3.37215	1.02e-28	1.41e-26
Arap3	2.10009	3.0921	1.09e-28	1.49e-26
Pdcd1lg2	-6.02361	2.31254	2.04e-28	2.73e-26
Ak2	-1.09584	6.1304	2.02e-28	2.73e-26
Ralgds	-1.68421	6.29601	3.49e-28	4.63e-26
Rab19	-1.67047	2.98285	8.65e-28	1.14e-25
Smap2	-1.61736	7.7718	1.27e-27	1.64e-25
Zcchc2	-1.09836	6.33886	1.38e-27	1.78e-25
Cd274	-1.29401	7.85845	1.7e-27	2.17e-25
Fam20c	-1.20952	8.864	2.53e-27	3.19e-25
Cgnl1	1.26226	4.4846	6.71e-27	8.38e-25
Vgll3	-4.05464	1.32261	7.11e-27	8.8e-25
Pcid2	-0.940962	4.91968	2.03e-26	2.49e-24
Tlr2	1.73799	4.15825	3.15e-26	3.82e-24
Pdgfra	-3.92749	1.07482	4.05e-26	4.87e-24
Lama4	-4.35487	0.701202	4.45e-26	5.3e-24
Rrp8	-1.09386	4.86911	1.75e-25	2.07e-23
Slamf9	1.35731	3.83069	1.93e-25	2.25e-23
Ddr2	-3.30706	1.52131	3.88e-25	4.49e-23
Tmem268	-1.11862	5.33655	4.06e-25	4.67e-23
Fgd3	0.82055	5.41245	4.25e-25	4.83e-23
Fmnl1	1.42911	5.82785	5.79e-25	6.53e-23
Ctsl	-1.32299	12.1616	6.46e-25	7.22e-23
F630028O10Rik	1.75293	4.45368	7.07e-25	7.84e-23
Errfi1	-1.29952	3.18452	8.45e-25	9.29e-23
Igfbp7	-2.53448	1.72368	1.2e-24	1.31e-22
Fkbp10	-4.30941	0.355136	1.78e-24	1.93e-22
Tent5c	-1.0886	5.01585	2.49e-24	2.67e-22
Tfrc	-1.34774	11.4052	3.88e-24	4.13e-22
Fzd1	-1.93335	2.7519	5.61e-24	5.91e-22
Scn3a	-6.68974	2.01563	6.04e-24	6.31e-22
Lipn	-2.27101	3.91701	7.03e-24	7.29e-22
Agpat3	-0.919101	6.72631	1.72e-23	1.77e-21
Ldlr	-1.05242	6.64803	2.12e-23	2.16e-21
Itgax	-2.11937	7.92756	2.69e-23	2.72e-21
St3gal5	1.61822	4.33144	3.34e-23	3.36e-21
Tagln	-2.41133	2.73453	5.14e-23	5.12e-21
Ahr	-2.09541	2.80439	5.96e-23	5.89e-21
Man1a	-1.07459	7.83479	7.59e-23	7.46e-21
Prickle2	-2.01966	2.26249	8.1e-23	7.9e-21
Gpt2	-1.0388	4.70505	1.44e-22	1.39e-20
Klf9	-1.27233	4.51033	1.49e-22	1.43e-20
Marcksl1	2.18949	2.40537	1.78e-22	1.7e-20
Gadd45b	-0.93422	6.10588	2.86e-22	2.71e-20
Egr2	-1.53771	6.26503	3.58e-22	3.36e-20
Atp8b4	1.35873	6.54238	3.66e-22	3.42e-20
Slc16a10	0.794344	6.83104	4.23e-22	3.92e-20
Rgl1	-0.834648	7.43298	8e-22	7.35e-20
Gatm	-0.98815	6.91665	8.24e-22	7.52e-20
Ehd2	-3.05455	0.985467	9.75e-22	8.83e-20
Ptpn22	1.10129	4.75094	1e-21	9.04e-20
Pkdcc	-1.93458	3.95298	1.97e-21	1.76e-19
Lrrc32	-1.85187	2.83332	1.99e-21	1.76e-19
Myl9	-3.20277	0.993073	2.1e-21	1.85e-19
Fbln2	-3.21192	1.87781	2.67e-21	2.34e-19
Ints6l	1.1078	5.65095	4.06e-21	3.53e-19
Bex1	-2.50832	5.18846	4.34e-21	3.75e-19
Plekha3	-0.838892	5.84186	5.26e-21	4.51e-19
Serpinb2	-4.14661	0.700973	6.75e-21	5.75e-19
Ier3	-2.48898	3.87968	1.05e-20	8.9e-19
Ccl8	-3.74899	2.23883	1.1e-20	9.27e-19
Fos	0.953341	5.51743	1.28e-20	1.07e-18
Cnrip1	-0.922803	6.36892	1.86e-20	1.54e-18
Ptpre	-0.863455	7.35479	2.19e-20	1.81e-18
Csf2rb	-1.12789	8.94741	2.26e-20	1.85e-18
Grem1	-3.06414	3.47005	2.69e-20	2.19e-18
Cldn11	-5.17746	1.30129	2.72e-20	2.2e-18
L1cam	1.40813	2.92544	5.96e-20	4.79e-18
Col6a3	-2.48508	1.88554	6.15e-20	4.91e-18
Cln5	-0.798882	6.8786	7.71e-20	6.12e-18
Fnbp1l	1.18159	4.95798	8.73e-20	6.89e-18
Proz	-1.48413	2.3121	8.95e-20	7.02e-18
Col4a2	-2.03764	2.37094	9.95e-20	7.75e-18
Tead1	-2.79904	1.50087	1.1e-19	8.55e-18
Prrx1	-2.68054	1.77054	1.17e-19	9.01e-18
Ldlrad3	-1.14973	4.5741	1.51e-19	1.16e-17
Pira2	1.05751	6.29767	2.32e-19	1.76e-17
Mmp8	-1.42259	4.88017	3.45e-19	2.61e-17
Pbxip1	-1.11561	3.9007	3.55e-19	2.67e-17
Ptpn14	-3.4421	0.751268	3.59e-19	2.68e-17
Cdh11	-2.95286	2.35008	3.6e-19	2.68e-17
Sgk1	-1.41791	6.44323	3.78e-19	2.8e-17
Atp1a3	-0.898141	7.96887	3.98e-19	2.93e-17
Fnbp1	0.768798	7.32743	4.26e-19	3.12e-17
Flt1	-2.81591	1.8095	5.13e-19	3.72e-17
Gng11	-1.03897	4.08101	5.4e-19	3.9e-17
Gm47123	-1.66765	4.0812	5.75e-19	4.13e-17
Tnfrsf26	-1.06997	4.74545	6.98e-19	4.98e-17
Cish	-4.04684	1.28107	7.29e-19	5.18e-17
Cttn	-1.18902	3.89635	9e-19	6.36e-17
Ric1	-0.773842	6.02544	9.24e-19	6.5e-17
Gm42031	-1.55443	6.47819	2.14e-18	1.48e-16
Ptgfrn	-1.11643	4.43532	2.15e-18	1.48e-16
Tox2	2.05057	3.79781	2.13e-18	1.48e-16
B3gnt7	-1.40572	2.89491	2.26e-18	1.56e-16
Clstn1	-0.822129	5.63642	2.51e-18	1.71e-16
Vcan	-2.24224	1.58533	3.25e-18	2.21e-16
Camk1d	0.758686	5.08772	4.15e-18	2.81e-16
Kirrel	-3.20514	0.883484	4.39e-18	2.95e-16
Tspan5	-0.965054	4.80008	4.44e-18	2.98e-16
Fgl2	-1.50406	5.22207	4.69e-18	3.12e-16
Thbs1	-2.73022	8.28412	5.04e-18	3.34e-16
Sema4b	-1.27347	3.98394	5.56e-18	3.67e-16
Tpm2	-2.3937	1.80237	5.99e-18	3.93e-16
Sh3pxd2a	0.785576	5.03185	6.25e-18	4.08e-16
Col5a1	-2.62749	1.75846	7.91e-18	5.14e-16
Mpc1	-0.715964	7.21839	8.39e-18	5.42e-16
Xylt2	0.906553	6.26557	8.52e-18	5.48e-16
Rapgef5	1.61598	4.15901	1e-17	6.4e-16
Bmp1	-2.81451	1.05658	1.01e-17	6.45e-16
Anxa4	-0.659864	9.59828	1.2e-17	7.6e-16
Clec7a	-1.31488	10.0509	1.36e-17	8.6e-16
Bcap31	-0.668558	7.92205	1.62e-17	1.02e-15
B830042I05Rik	-2.4297	5.26092	1.69e-17	1.06e-15
Cd22	-1.28589	4.54386	1.74e-17	1.08e-15
Awat1	-2.50921	1.92446	2.28e-17	1.41e-15
Arhgap22	1.02768	4.61104	2.99e-17	1.84e-15
Dgkd	0.79489	6.80173	3.12e-17	1.91e-15
Snn	-1.23839	3.7736	3.16e-17	1.92e-15
Limd2	0.944426	5.21648	3.28e-17	1.99e-15
Pcp4l1	1.97671	5.48386	3.49e-17	2.11e-15
Adamts5	-4.10784	-0.0897397	3.73e-17	2.24e-15
Il31ra	-4.58849	0.624876	3.77e-17	2.26e-15
Ddah1	-6.70388	0.0375469	4.34e-17	2.58e-15
Rasgef1b	0.772583	7.0021	4.45e-17	2.64e-15
Cblb	-0.908185	7.95374	4.51e-17	2.66e-15
Ptger4	1.15489	2.63119	4.52e-17	2.66e-15
Smg5	-0.780499	5.21035	4.79e-17	2.8e-15
Mrc2	-3.24461	0.577013	5.45e-17	3.16e-15
Epas1	-2.50776	5.20823	5.43e-17	3.16e-15
Wfs1	-1.2458	5.02032	5.57e-17	3.21e-15
Npy	1.28813	5.54831	5.86e-17	3.36e-15
Timp1	-2.84612	1.71491	7.04e-17	4.03e-15
Abcb4	1.14232	4.48636	7.28e-17	4.14e-15
Gm13431	-2.18004	1.32592	1.03e-16	5.86e-15
Grb10	-2.96643	1.05593	1.05e-16	5.94e-15
Hk2	-0.94659	5.73712	1.4e-16	7.85e-15
Aldh1b1	-1.15016	4.13324	1.47e-16	8.21e-15
Inhba	-2.55027	2.00546	2.11e-16	1.18e-14
Dhcr7	-0.952608	4.85727	2.29e-16	1.27e-14
Itgb3	-1.21781	7.33311	2.5e-16	1.38e-14
Mvd	-1.23818	3.62301	2.54e-16	1.39e-14
Gda	-1.16217	4.93	3.39e-16	1.85e-14
Fdps	-1.05995	4.93024	4.34e-16	2.36e-14
Rnase2a	-6.78667	0.164065	4.72e-16	2.56e-14
Nlrp1b	0.90058	4.45168	5.18e-16	2.8e-14
Enah	-2.18504	1.833	5.62e-16	3.02e-14
Map2	-2.77889	1.8553	7.21e-16	3.87e-14
Atp6v0a1	-0.656741	9.91095	8.14e-16	4.34e-14
Matk	-1.35107	4.75638	8.67e-16	4.61e-14
Fgf7	-4.20755	0.367382	9.69e-16	5.13e-14
Cnn3	-2.16355	1.40775	1.01e-15	5.3e-14
Focad	-0.930589	4.36207	1.12e-15	5.86e-14
Htra1	-1.59234	2.18035	1.26e-15	6.58e-14
Tnip3	0.906151	5.08363	1.26e-15	6.58e-14
Dhcr24	-1.20206	4.35272	1.49e-15	7.72e-14
Ptger2	-1.31471	3.83192	1.58e-15	8.14e-14
Sgms2	-1.21344	4.51186	1.65e-15	8.49e-14
Plxna2	0.738832	5.36015	1.85e-15	9.48e-14
Mgst1	-0.95908	7.43822	2.26e-15	1.16e-13
Gm42427	-1.24735	7.67532	2.51e-15	1.27e-13
Znrf2	-0.635484	7.26607	2.91e-15	1.48e-13
Col8a1	-2.61711	1.67837	3.06e-15	1.55e-13
Slc37a3	-0.669395	4.98082	3.14e-15	1.58e-13
Fcrl1	1.91151	1.56891	3.37e-15	1.69e-13
Arrb2	0.757842	7.03233	3.55e-15	1.76e-13
Pid1	0.871217	7.22952	3.55e-15	1.76e-13
Ckap4	-0.698491	5.65855	3.7e-15	1.83e-13
Nanos1	1.82342	2.57253	3.9e-15	1.92e-13
Itgb8	-2.93777	1.48388	4.09e-15	2.01e-13
Hmgcs1	-0.946476	7.39607	4.27e-15	2.09e-13
Phldb2	-2.71099	0.762953	4.82e-15	2.35e-13
Ap2m1	-0.80525	9.58124	5.19e-15	2.52e-13
Apol7c	-3.53144	3.511	5.32e-15	2.55e-13
C5ar1	0.649788	8.72574	5.29e-15	2.55e-13
Igfbp4	1.34191	6.4234	5.29e-15	2.55e-13
Svep1	-3.38802	0.380231	5.4e-15	2.58e-13
Cttnbp2nl	0.622196	6.82614	5.68e-15	2.71e-13
Pole	1.42407	3.90226	7.03e-15	3.34e-13
Mettl7a1	-0.619886	6.10831	7.69e-15	3.64e-13
Cacna2d4	-2.48565	3.80864	8.7e-15	4.1e-13
Gpr162	1.09899	5.0781	9.71e-15	4.56e-13
Gmfg	1.04789	4.30731	1.05e-14	4.93e-13
Afap1	-1.50397	2.82238	1.12e-14	5.21e-13
Ptchd1	1.62173	2.52165	1.15e-14	5.35e-13
Dock5	0.648929	4.93696	1.24e-14	5.75e-13
Ncapg2	0.995029	5.72586	1.26e-14	5.82e-13
Alas1	-0.746451	7.40816	1.3e-14	5.98e-13
Htr1b	-2.95711	1.31377	1.57e-14	7.21e-13
Sema7a	-2.64818	0.821372	1.74e-14	7.92e-13
Shld1	-1.51249	3.9638	1.86e-14	8.46e-13
Ctnnb1	-0.682079	8.84993	2.47e-14	1.12e-12
Klhl6	0.902621	3.91475	2.51e-14	1.13e-12
Tmem202	-1.028	3.31271	2.68e-14	1.2e-12
Ear2	-3.06673	3.30921	2.83e-14	1.27e-12
Evi2a	0.778991	7.46783	2.84e-14	1.27e-12
Tceal9	-1.12684	7.7041	2.99e-14	1.33e-12
Slamf8	-1.17387	5.24855	3.08e-14	1.36e-12
Fgd2	1.17791	3.67598	3.23e-14	1.43e-12
Dapk1	0.638673	5.56202	3.37e-14	1.49e-12
Arhgap4	0.91028	4.40617	3.56e-14	1.56e-12
Sulf1	-2.6873	0.589995	5.44e-14	2.38e-12
Abcb1b	1.05453	5.11741	5.69e-14	2.48e-12
Pcyt1b	2.19084	1.02442	5.95e-14	2.58e-12
Ccl4	1.4421	4.84134	6.29e-14	2.72e-12
Nap1l1	0.80106	8.05948	6.75e-14	2.91e-12
Ccr3	0.970893	5.90077	7.25e-14	3.12e-12
Nrg1	-3.17244	0.225108	8.12e-14	3.48e-12
F630040K05Rik	-2.07593	3.23134	8.95e-14	3.82e-12
Hck	0.629304	5.59318	9.78e-14	4.17e-12
Slc40a1	0.815946	9.0802	9.93e-14	4.21e-12
Angptl2	-1.09563	7.38792	1.01e-13	4.27e-12
Sqle	-0.840633	6.02135	1.12e-13	4.71e-12
Phospho1	-1.60006	4.98787	1.12e-13	4.72e-12
Atp6v0d2	-0.985976	10.7964	1.18e-13	4.94e-12
Tlr9	1.1542	3.1923	1.18e-13	4.94e-12
Parva	-2.25748	1.21618	1.21e-13	5.02e-12
Aifm2	-0.909512	4.41917	1.21e-13	5.02e-12
Arhgap18	0.734282	7.59387	1.27e-13	5.23e-12
Ceacam19	-2.33996	1.83037	1.29e-13	5.31e-12
Ak4	-1.62904	1.4794	1.37e-13	5.61e-12
Anxa3	-0.569204	8.08506	1.4e-13	5.75e-12
Ankle1	1.7598	1.54058	1.42e-13	5.78e-12
Mllt3	-0.868641	3.77298	1.66e-13	6.74e-12
Rab3il1	-0.725737	7.35099	1.77e-13	7.17e-12
Lgmn	-0.61735	10.6279	1.78e-13	7.19e-12
Rnasel	0.900333	7.007	1.79e-13	7.21e-12
Plekhf1	-2.08229	1.83338	2.16e-13	8.69e-12
Rgs1	1.06081	7.24051	2.27e-13	9.08e-12
Stt3b	-0.682754	7.84016	2.4e-13	9.58e-12
Cd300lb	-0.559928	8.34568	2.55e-13	1.01e-11
Irf1	-1.00667	5.95844	2.57e-13	1.02e-11
Oxct1	-0.570855	8.00249	2.65e-13	1.05e-11
Postn	-1.8581	2.10228	2.73e-13	1.08e-11
Tnf	0.966957	3.23439	2.76e-13	1.09e-11
Loxl1	-3.36638	0.38689	3.03e-13	1.19e-11
Cdh2	-2.54923	0.97824	3.31e-13	1.29e-11
Rps6ka5	1.11671	2.79955	3.8e-13	1.48e-11
Ssh2	0.93141	4.02137	3.87e-13	1.5e-11
Tbc1d4	-0.614682	5.35788	4.21e-13	1.63e-11
Zyx	-0.710442	6.71762	4.65e-13	1.8e-11
Lpin2	0.637512	6.22996	5.06e-13	1.95e-11
Nabp1	-0.969726	7.37913	5.5e-13	2.11e-11
Bub1b	1.23118	4.46973	5.89e-13	2.25e-11
Clec16a	-0.639981	5.11233	7.04e-13	2.69e-11
Acp5	-1.78829	4.27769	7.42e-13	2.82e-11
Tiparp	-0.664644	5.41989	7.98e-13	3.03e-11
Havcr2	0.978963	4.84111	8.61e-13	3.26e-11
Cdk14	1.01924	6.36609	8.8e-13	3.32e-11
Gm5615	-2.91243	1.44874	8.98e-13	3.37e-11
Iqgap3	1.28075	4.35168	8.95e-13	3.37e-11
Bcl2a1b	-0.825257	6.87017	9.5e-13	3.55e-11
St3gal6	2.7883	0.85478	9.75e-13	3.64e-11
Ampd3	0.674151	5.55441	9.98e-13	3.71e-11
Gpr34	1.56027	2.94797	1.03e-12	3.82e-11
Clec4a3	-0.920158	6.89562	1.04e-12	3.84e-11
Atp1b3	-1.20035	9.0828	1.05e-12	3.87e-11
Pdgfb	1.02254	5.09079	1.06e-12	3.89e-11
Osmr	-2.79656	0.666859	1.07e-12	3.94e-11
Tmem126b	-0.60506	5.32181	1.23e-12	4.51e-11
Spn	1.33953	3.02201	1.24e-12	4.53e-11
Acpp	-2.07909	2.68001	1.3e-12	4.73e-11
Gm26880	-1.03996	5.47635	1.45e-12	5.24e-11
Fam214a	0.736615	5.17961	1.53e-12	5.51e-11
6030408B16Rik	-2.39938	3.71267	1.71e-12	6.18e-11
Pld4	0.795444	6.27772	1.87e-12	6.73e-11
Adgre4	2.18299	1.54433	1.92e-12	6.87e-11
Ak8	-0.937582	4.4047	2.34e-12	8.36e-11
Rin3	-0.848921	5.44977	2.4e-12	8.56e-11
Serpinf1	-2.80181	0.62419	2.49e-12	8.84e-11
Baiap2	-0.738043	6.01268	2.5e-12	8.84e-11
Sncaip	2.58281	1.58584	2.5e-12	8.84e-11
Kif15	1.42628	3.87785	2.57e-12	9.06e-11
Lrrc8d	-0.517782	6.58506	2.59e-12	9.09e-11
Stxbp3	-0.795909	6.76954	2.64e-12	9.24e-11
Acaca	-0.549635	5.6176	2.67e-12	9.32e-11
Tspan13	0.80397	5.49426	2.81e-12	9.8e-11
Il11ra1	-1.20715	6.11504	3.1e-12	1.08e-10
Arl15	-0.872898	3.66343	3.13e-12	1.08e-10
Mctp1	0.910857	6.116	3.11e-12	1.08e-10
Hvcn1	-0.770345	7.69531	3.28e-12	1.13e-10
Dennd1c	0.827455	4.29077	3.6e-12	1.24e-10
Tanc2	-0.839144	6.6343	3.8e-12	1.3e-10
Map4k4	-0.714329	7.36843	3.99e-12	1.37e-10
Ccl7	-2.3145	4.7692	4.27e-12	1.45e-10
Tmem206	-0.500589	6.95369	4.24e-12	1.45e-10
Basp1	0.810869	7.6428	4.27e-12	1.45e-10
Sntb2	0.63654	5.47796	4.37e-12	1.48e-10
Serpina3g	-2.44442	0.237508	4.48e-12	1.51e-10
Rras2	-1.23049	3.63709	4.48e-12	1.51e-10
Swap70	0.550444	6.10451	5.01e-12	1.68e-10
Pmepa1	-3.20601	0.147243	5.04e-12	1.69e-10
Klf4	-1.40959	2.5547	5.37e-12	1.79e-10
Rcan1	0.557979	5.13001	5.36e-12	1.79e-10
Atf3	-0.575889	9.09817	5.47e-12	1.82e-10
Rassf8	-0.775798	6.47821	5.58e-12	1.85e-10
Tmem132a	-0.855294	6.80632	5.71e-12	1.89e-10
Plek	-0.735818	10.7226	5.85e-12	1.93e-10
Wsb2	-0.751588	7.6505	6.46e-12	2.12e-10
Syt13	-2.3413	0.357683	6.69e-12	2.19e-10
Ccl12	-2.67344	1.22062	7.27e-12	2.38e-10
Tacr1	-2.27986	1.5174	7.46e-12	2.43e-10
Lilr4b	0.769166	9.63894	7.5e-12	2.44e-10
C3	-1.46387	4.6419	7.72e-12	2.51e-10
Pdp1	-0.580724	6.62916	7.86e-12	2.55e-10
Ctla2b	1.76774	3.69376	7.96e-12	2.57e-10
Phlpp1	0.680418	4.68427	8.78e-12	2.82e-10
2900026A02Rik	1.65079	2.73055	8.75e-12	2.82e-10
Clec4d	0.594239	8.52478	8.85e-12	2.84e-10
Dock4	-0.658906	4.98698	9.13e-12	2.92e-10
Padi2	0.728861	5.19216	9.91e-12	3.15e-10
Ptprg	-3.42391	0.0641374	1.01e-11	3.21e-10
Kynu	-2.20168	0.690872	1.11e-11	3.5e-10
Sez6l2	1.74668	1.53084	1.12e-11	3.55e-10
Bcar1	-3.12667	0.0435185	1.15e-11	3.61e-10
Csf2rb2	-0.673499	9.01771	1.15e-11	3.61e-10
Lig1	1.08148	4.89453	1.16e-11	3.64e-10
Cited2	0.57411	5.78856	1.17e-11	3.66e-10
Cd151	-0.713107	6.22502	1.17e-11	3.67e-10
Stk17b	0.73773	5.93934	1.18e-11	3.67e-10
Knl1	1.49043	4.02558	1.18e-11	3.67e-10
Rassf4	0.685166	8.04193	1.27e-11	3.93e-10
Ndrg1	0.839973	5.25285	1.33e-11	4.11e-10
Fermt2	-2.40305	1.14783	1.38e-11	4.27e-10
Fam129b	-0.762655	9.6506	1.43e-11	4.39e-10
Fdft1	-0.960409	4.10431	1.45e-11	4.44e-10
Fat4	-3.40854	0.468466	1.52e-11	4.67e-10
Ccdc80	-2.34636	1.03624	1.64e-11	5e-10
Ogn	-3.8933	-0.206507	1.71e-11	5.19e-10
Gm48274	-1.71175	3.25422	1.79e-11	5.42e-10
Cdk20	-0.895757	4.83655	2.09e-11	6.32e-10
Mylk	-1.89601	1.02403	2.18e-11	6.57e-10
Zbp1	-1.27529	2.61944	2.23e-11	6.7e-10
Ptprf	-2.28208	0.303013	2.24e-11	6.71e-10
Kif20a	1.23864	4.85396	2.35e-11	7.03e-10
Slc15a3	-0.655927	8.88906	2.48e-11	7.41e-10
Ttyh2	-0.660175	7.46508	2.55e-11	7.6e-10
Psmb10	-1.11721	5.30115	2.57e-11	7.62e-10
Tbx15	-3.37574	-0.224142	2.74e-11	8.12e-10
Msmo1	-0.655617	6.85185	2.93e-11	8.65e-10
Atp6v1e1	-0.520204	7.85454	2.95e-11	8.7e-10
Rhobtb1	0.984011	3.29455	3.02e-11	8.89e-10
Yap1	-2.46849	0.484175	3.27e-11	9.6e-10
Fyb	0.839406	8.40803	3.28e-11	9.62e-10
Cd81	1.5906	5.48765	3.44e-11	1.01e-09
Lpin1	-0.754195	5.76771	3.49e-11	1.02e-09
Fabp5	-0.52956	10.8298	3.57e-11	1.04e-09
Aspm	1.4262	4.25531	3.88e-11	1.13e-09
Pdgfrb	-2.50794	0.807059	3.97e-11	1.14e-09
Amotl2	-2.4858	0.594867	3.93e-11	1.14e-09
Pik3ap1	0.520807	8.80279	3.95e-11	1.14e-09
Arhgap6	-0.892611	5.5293	4.01e-11	1.15e-09
Slit2	-2.76207	0.567739	4.61e-11	1.32e-09
Fgd6	-0.658775	6.39513	4.84e-11	1.38e-09
Ckap2	1.48761	3.1907	4.84e-11	1.38e-09
Smad3	0.784474	3.63965	5.11e-11	1.46e-09
Rap2a	0.522105	6.91652	5.3e-11	1.51e-09
Vdr	-3.34555	-0.298865	5.71e-11	1.62e-09
Frmd6	0.594658	5.40785	5.86e-11	1.66e-09
Kdm6b	-0.945375	4.52356	6.95e-11	1.96e-09
Il1a	-1.4517	2.42619	7.82e-11	2.2e-09
Prc1	1.22592	5.49132	8.43e-11	2.37e-09
Gpx8	-3.26573	-0.218457	8.6e-11	2.4e-09
Dusp4	-0.908374	5.46926	8.6e-11	2.4e-09
Hjurp	0.922812	5.51226	8.58e-11	2.4e-09
Traf3ip3	1.6042	2.39092	8.76e-11	2.44e-09
Slc36a4	-0.563941	6.73759	9.2e-11	2.56e-09
Tnfrsf21	-0.57902	6.65129	9.3e-11	2.58e-09
Neo1	-1.32791	2.40619	9.44e-11	2.62e-09
Ccl6	-0.768441	9.22673	1.04e-10	2.89e-09
Slc18a1	-0.938818	3.67357	1.06e-10	2.92e-09
Tarm1	-2.90232	0.5373	1.15e-10	3.16e-09
Ndc80	1.3216	4.05423	1.15e-10	3.17e-09
H2-T23	-0.833216	7.15972	1.18e-10	3.24e-09
Cxcl2	2.61499	0.165533	1.19e-10	3.24e-09
Fhl2	-3.37246	-0.198228	1.19e-10	3.25e-09
Ccr1	-0.62461	7.07629	1.21e-10	3.29e-09
Kif23	1.1205	5.11323	1.33e-10	3.6e-09
Gnb4	-0.796494	4.40797	1.37e-10	3.72e-09
Cyp51	-0.745234	5.84102	1.37e-10	3.72e-09
Mad2l1	0.996247	4.96698	1.49e-10	4.02e-09
Nfxl1	0.678772	4.42511	1.52e-10	4.08e-09
Timp3	-1.61946	1.78462	1.67e-10	4.48e-09
Fhl3	0.649531	5.14025	1.74e-10	4.64e-09
Psd3	0.986695	6.16844	1.81e-10	4.82e-09
AU020206	-0.584925	5.46625	1.87e-10	4.97e-09
Dnah2	-1.3749	3.10279	1.91e-10	5.08e-09
Pcdh19	-3.87835	-0.257531	1.92e-10	5.1e-09
Adrb2	1.67152	1.87608	2e-10	5.29e-09
Cxcr3	1.65521	1.49038	2.05e-10	5.4e-09
Dhrs3	-0.526792	9.10332	2.13e-10	5.62e-09
Dbi	-0.509184	6.5635	2.18e-10	5.74e-09
Hcls1	0.531023	7.8116	2.19e-10	5.74e-09
Ctsz	-0.588134	9.99363	2.21e-10	5.79e-09
Mxra8	-2.65254	0.298142	2.3e-10	6.01e-09
Ets2	0.809373	4.58191	2.3e-10	6.01e-09
Arrdc4	-0.65677	4.15711	2.35e-10	6.1e-09
Nusap1	1.42373	4.47448	2.35e-10	6.1e-09
Arhgap29	-2.30839	0.819146	2.39e-10	6.21e-09
Ccnb2	1.37117	3.93227	2.48e-10	6.4e-09
Icosl	2.13189	0.856149	2.48e-10	6.4e-09
Hsph1	-0.532484	5.93285	2.68e-10	6.92e-09
C2cd2l	-0.656678	5.11945	2.7e-10	6.93e-09
Rcbtb2	0.592366	7.3843	2.7e-10	6.93e-09
Eid1	0.766352	6.52875	2.75e-10	7.04e-09
Nampt	-0.650618	7.65285	3.05e-10	7.79e-09
Stil	1.54075	3.1002	3.07e-10	7.82e-09
Idi1	-0.873093	5.47659	3.13e-10	7.96e-09
Cenpe	1.30961	5.32813	3.17e-10	8.05e-09
Arl4c	-0.664252	6.55884	3.28e-10	8.33e-09
Hfe	-0.707215	5.80748	3.39e-10	8.59e-09
Lmnb1	1.21764	4.3549	3.45e-10	8.72e-09
Neurl3	0.741418	6.5448	3.7e-10	9.32e-09
Atad2	0.889164	5.82844	3.84e-10	9.67e-09
S1pr1	0.715864	5.85014	3.94e-10	9.9e-09
Psap	-0.67197	14.3014	3.97e-10	9.94e-09
Stab1	0.904265	8.46488	4.42e-10	1.1e-08
Atp6v1b2	-0.724766	10.4757	4.45e-10	1.11e-08
Slc36a1	-0.612661	6.34009	4.54e-10	1.13e-08
Hmgb3	1.36042	3.11225	4.65e-10	1.16e-08
Itpr3	1.04774	4.41982	4.84e-10	1.2e-08
Sod1	0.510697	6.98314	5.19e-10	1.28e-08
Ipmk	-0.510648	5.82293	5.23e-10	1.29e-08
Mcm7	0.903818	4.99431	5.22e-10	1.29e-08
Cd9	-0.541471	8.79026	5.45e-10	1.34e-08
Mafb	-0.625067	8.14979	5.61e-10	1.38e-08
Ctsk	-0.718362	4.98805	5.77e-10	1.41e-08
Gm4951	-1.81219	1.63788	5.87e-10	1.44e-08
Coro1a	1.09903	6.44435	5.99e-10	1.46e-08
Asph	0.668324	7.96756	6.07e-10	1.48e-08
Kif11	1.31187	4.99481	6.2e-10	1.51e-08
Gramd3	-0.50137	5.22889	6.43e-10	1.55e-08
Knstrn	1.4294	3.69509	6.45e-10	1.56e-08
Tfec	-0.565353	5.18348	6.59e-10	1.59e-08
Zfp609	-0.69365	4.98117	6.65e-10	1.6e-08
Cnr2	-0.607449	5.38597	7.01e-10	1.68e-08
Msra	0.542428	4.69156	7.08e-10	1.7e-08
Cavin1	-0.904577	3.27338	7.44e-10	1.78e-08
Gm15601	-1.8179	1.7797	7.64e-10	1.82e-08
Top2a	1.257	7.06721	7.61e-10	1.82e-08
Ifi30	-1.25582	7.10577	7.85e-10	1.87e-08
Espl1	1.10007	3.28358	7.9e-10	1.87e-08
Ly6e	-0.982421	4.97039	7.95e-10	1.88e-08
Prr11	1.33024	4.25498	8.41e-10	1.99e-08
Pkp2	-1.50018	3.12012	8.57e-10	2.02e-08
Tjp1	-2.40693	0.458578	8.63e-10	2.03e-08
Gsap	0.724139	3.98157	8.78e-10	2.06e-08
Fam124a	-1.95213	2.03806	9.85e-10	2.31e-08
Racgap1	1.19213	5.1501	9.88e-10	2.32e-08
Klhl33	-2.12692	0.580737	1.01e-09	2.36e-08
Zc3h12d	0.510615	6.15077	1.01e-09	2.37e-08
Lhfp	-2.33479	0.829651	1.03e-09	2.41e-08
Cep55	1.34243	3.81467	1.06e-09	2.45e-08
Cd44	-0.517992	9.59052	1.06e-09	2.46e-08
Rps6kc1	-0.603114	5.48734	1.07e-09	2.47e-08
Ccbe1	-1.03753	2.60553	1.1e-09	2.55e-08
Csf3r	-0.626234	6.2726	1.15e-09	2.64e-08
Rrm1	0.878534	6.44942	1.15e-09	2.64e-08
Mgat1	-0.88724	6.96623	1.17e-09	2.68e-08
Pxdn	-2.57857	0.166541	1.17e-09	2.69e-08
Nfkbie	0.877428	2.65306	1.18e-09	2.71e-08
Tbc1d16	-0.827023	3.851	1.23e-09	2.82e-08
Sardh	-1.3927	2.31067	1.26e-09	2.88e-08
E2f2	1.18367	3.06067	1.29e-09	2.93e-08
Numbl	-0.890594	2.96214	1.32e-09	3e-08
H2afy2	-1.40827	1.3622	1.35e-09	3.06e-08
Gpnmb	-0.525859	13.9065	1.4e-09	3.15e-08
Lilra6	0.904775	2.94073	1.39e-09	3.15e-08
Mcm6	0.854314	6.7417	1.41e-09	3.17e-08
Wwtr1	-2.85074	-0.15989	1.47e-09	3.31e-08
Idh1	-0.648121	8.56774	1.5e-09	3.36e-08
Gmnn	0.672914	4.36473	1.5e-09	3.36e-08
Tmem165	-0.886906	7.68647	1.51e-09	3.37e-08
Map3k9	1.07317	2.77004	1.53e-09	3.41e-08
Rnf150	0.51641	6.9697	1.53e-09	3.42e-08
Lama3	1.41609	2.09291	1.58e-09	3.52e-08
Gm21188	-0.682786	6.39084	1.68e-09	3.72e-08
Sort1	-0.708878	8.09078	1.68e-09	3.73e-08
Ccnd1	1.09164	7.75527	1.69e-09	3.73e-08
Sh3bgrl2	0.553659	6.39868	1.71e-09	3.77e-08
Man2b1	-0.567677	9.73014	1.72e-09	3.79e-08
Alox5ap	0.656918	6.90912	1.77e-09	3.89e-08
Gm8221	-4.32148	0.585601	1.87e-09	4.08e-08
Mcm3	0.699046	5.57662	1.87e-09	4.09e-08
Thbs2	-2.47336	0.410549	1.93e-09	4.2e-08
Ebi3	0.964932	3.84159	1.96e-09	4.26e-08
Colgalt1	-0.565682	7.95642	1.99e-09	4.32e-08
Plk3	-1.3057	2.71947	2.04e-09	4.42e-08
Rbfox2	-1.28543	1.61402	2.09e-09	4.51e-08
Kif4	1.2658	4.07819	2.09e-09	4.52e-08
Lpar6	0.792302	5.14508	2.17e-09	4.67e-08
Tgfb1i1	-2.0431	0.492547	2.25e-09	4.83e-08
Fosl2	-0.588672	5.42096	2.34e-09	5.03e-08
Nfib	-2.84366	0.183658	2.4e-09	5.14e-08
Tnk2	-0.954359	2.34576	2.4e-09	5.14e-08
Anxa6	-0.587807	7.49565	2.4e-09	5.14e-08
Ncaph	1.23697	4.3441	2.47e-09	5.28e-08
Birc5	1.14413	4.08453	2.52e-09	5.35e-08
E330009J07Rik	-0.800629	3.51812	2.61e-09	5.53e-08
Ska1	1.83758	1.38505	2.62e-09	5.55e-08
Bicc1	-2.9552	-0.101604	2.74e-09	5.8e-08
Wwc2	0.691957	4.71718	2.79e-09	5.89e-08
Stra6l	-0.636869	4.67204	2.82e-09	5.94e-08
Mki67	1.28105	7.52828	2.94e-09	6.18e-08
Edem2	-0.527141	6.10034	2.96e-09	6.22e-08
Sgo2a	1.2792	3.75179	2.98e-09	6.26e-08
Gstm2	-1.24123	2.7172	3.02e-09	6.32e-08
Asf1b	1.08576	3.86742	3.02e-09	6.32e-08
Slc25a37	0.648654	5.09818	3.29e-09	6.88e-08
Elmo1	0.562764	6.54634	3.33e-09	6.93e-08
Map3k5	0.757634	3.41854	3.39e-09	7.06e-08
Igsf3	-3.03168	-0.0501766	3.92e-09	8.11e-08
Ptprd	-2.87348	0.133644	3.95e-09	8.16e-08
Nes	1.11299	4.92953	3.95e-09	8.16e-08
Secisbp2l	-0.516601	7.70746	4.1e-09	8.44e-08
Neil3	1.27505	2.93749	4.1e-09	8.44e-08
Tusc3	-0.660265	5.28138	4.33e-09	8.89e-08
Tpcn2	-0.570141	6.63424	4.33e-09	8.89e-08
Aldh1a2	-3.11388	0.105122	4.38e-09	8.98e-08
Lst1	0.835882	4.99466	4.44e-09	9.08e-08
Tifab	-0.716085	5.57662	4.54e-09	9.27e-08
Olfm1	-0.90709	2.93122	4.71e-09	9.6e-08
Il1rn	0.817755	6.22923	4.76e-09	9.69e-08
Prss23	-2.44908	0.189827	4.79e-09	9.71e-08
Gabre	-2.31811	1.80931	4.97e-09	1.01e-07
Gm48161	-0.763185	6.67962	5.09e-09	1.03e-07
Gdpd5	0.839125	3.43763	5.07e-09	1.03e-07
E2f7	1.3201	2.93273	5.15e-09	1.04e-07
Kntc1	1.30228	4.35436	5.22e-09	1.05e-07
Clspn	1.30672	4.28977	5.21e-09	1.05e-07
Inhbb	-3.24569	-0.357105	5.3e-09	1.06e-07
Cdca2	1.28709	3.19796	5.46e-09	1.09e-07
Spc25	1.06677	4.1445	5.5e-09	1.1e-07
Tm4sf1	-2.44631	0.0246344	5.58e-09	1.11e-07
Traf5	-0.828584	3.934	5.61e-09	1.12e-07
Nfkbia	0.65117	4.21434	5.74e-09	1.14e-07
Gpc4	-3.00291	0.0112125	6.01e-09	1.19e-07
Adm	-2.62072	-0.125661	6.02e-09	1.19e-07
Pdk4	-2.14234	0.749849	6.03e-09	1.19e-07
Pik3cg	0.560089	6.24328	6.45e-09	1.27e-07
Pak1	0.597758	4.87557	6.59e-09	1.3e-07
Ehd1	0.618115	5.24599	6.65e-09	1.31e-07
Card11	1.42903	3.62963	6.85e-09	1.35e-07
Dhrs9	-0.568613	6.48075	7.09e-09	1.39e-07
Cuedc1	1.2677	1.96191	7.2e-09	1.41e-07
Serping1	-2.20021	0.75208	7.25e-09	1.42e-07
Ncapd2	1.10192	5.12999	7.3e-09	1.43e-07
Tle3	-0.569154	5.72507	7.57e-09	1.48e-07
Fcgr1	0.592381	6.54593	7.62e-09	1.49e-07
Slc24a3	1.23303	3.03431	7.64e-09	1.49e-07
Slco2a1	-3.05014	-0.241308	7.93e-09	1.54e-07
Trf	-1.00952	9.78575	8.01e-09	1.55e-07
B4galt5	-0.552958	7.43999	8.17e-09	1.58e-07
Col18a1	1.12287	6.10817	8.64e-09	1.67e-07
Map1b	-1.9885	0.593646	8.76e-09	1.69e-07
Batf3	-1.8478	1.87035	8.97e-09	1.73e-07
Dhfr	1.0461	3.81918	9.01e-09	1.73e-07
Tmod1	0.962044	3.44149	9.05e-09	1.74e-07
Gm2115	-2.53047	0.115115	9.15e-09	1.75e-07
Scd1	-1.4204	1.62102	9.13e-09	1.75e-07
Ahsa1	0.568226	7.85795	9.36e-09	1.79e-07
Kif1a	-1.16264	2.79603	9.62e-09	1.84e-07
Dusp18	-1.04912	2.38818	9.79e-09	1.86e-07
Dcbld2	-0.605049	4.78723	9.76e-09	1.86e-07
Cybb	0.571089	9.08789	9.8e-09	1.86e-07
Anln	1.29852	4.99711	1.03e-08	1.96e-07
Eef1a2	-1.43524	3.96223	1.04e-08	1.97e-07
Abcg1	-0.659568	8.63848	1.04e-08	1.97e-07
Parp8	0.678843	3.96329	1.07e-08	2.01e-07
Gsto1	-0.536346	6.03484	1.09e-08	2.06e-07
Ptgir	-0.979236	3.3543	1.1e-08	2.07e-07
Clec4e	1.84821	1.94584	1.11e-08	2.08e-07
Wwp1	0.64395	8.74733	1.17e-08	2.2e-07
Adhfe1	-1.67722	0.764088	1.18e-08	2.22e-07
Gm20634	-0.842227	4.11636	1.18e-08	2.22e-07
Vwf	-0.625012	6.94403	1.28e-08	2.39e-07
Atf5	-0.696817	6.17393	1.3e-08	2.44e-07
Sc5d	-0.559485	5.67132	1.31e-08	2.44e-07
Ebf1	-2.94778	0.00976765	1.42e-08	2.65e-07
Cav2	0.912496	5.81703	1.43e-08	2.66e-07
Cd5l	0.784408	11.1099	1.46e-08	2.71e-07
Hmmr	1.14873	4.87752	1.47e-08	2.73e-07
Cdc20	1.16375	3.1319	1.49e-08	2.76e-07
Penk	-1.21156	2.35588	1.5e-08	2.77e-07
Pparg	-0.506387	6.75421	1.54e-08	2.84e-07
Hmgcr	-0.577492	6.35548	1.62e-08	2.99e-07
Ccna2	1.29973	5.45785	1.7e-08	3.12e-07
Cenpf	1.34909	4.59405	1.7e-08	3.12e-07
Septin9	-0.587095	8.17805	1.76e-08	3.22e-07
Ap2a2	-0.582997	7.75644	1.78e-08	3.25e-07
Ighg2b	-3.73838	0.0631055	1.8e-08	3.27e-07
Gm49151	-1.89175	3.63323	1.79e-08	3.27e-07
Dbn1	-3.25485	-0.262367	1.8e-08	3.28e-07
3110039I08Rik	-2.07816	0.873566	1.88e-08	3.42e-07
Hbegf	-0.905197	2.68047	1.88e-08	3.42e-07
Kif20b	1.1911	4.56497	2e-08	3.62e-07
Gas6	0.671449	8.51688	2.02e-08	3.66e-07
Cdk1	1.06374	4.95552	2.09e-08	3.76e-07
Ralgps2	0.873017	2.76682	2.11e-08	3.79e-07
Dlc1	-1.60309	0.958261	2.14e-08	3.85e-07
Trim59	1.34271	3.74284	2.14e-08	3.85e-07
Cdc6	1.22869	2.81214	2.17e-08	3.9e-07
Ldhb	-0.830661	3.00812	2.18e-08	3.91e-07
Gmip	0.509088	6.09173	2.21e-08	3.96e-07
Dlgap5	1.17432	4.14654	2.22e-08	3.96e-07
Mcm5	0.949926	5.41767	2.24e-08	3.98e-07
Brca1	0.806646	4.24784	2.29e-08	4.08e-07
Auh	-0.636062	4.33909	2.32e-08	4.13e-07
Rad54l	0.792875	3.65997	2.35e-08	4.18e-07
Ms4a6d	-0.500004	7.49719	2.37e-08	4.19e-07
Ablim1	-2.45959	0.386228	2.4e-08	4.23e-07
Nsd2	0.627903	6.10503	2.43e-08	4.29e-07
Stmn1	1.01967	6.44289	2.5e-08	4.4e-07
Pilra	1.42053	2.83438	2.5e-08	4.4e-07
Aif1	0.69348	4.92551	2.55e-08	4.48e-07
Tbc1d31	0.82852	4.21214	2.63e-08	4.6e-07
Tagap	1.20603	2.19293	2.65e-08	4.64e-07
Septin11	-0.515738	6.23118	2.67e-08	4.66e-07
Brca2	0.833221	3.37689	2.76e-08	4.8e-07
5830432E09Rik	-0.795416	3.07481	2.8e-08	4.86e-07
Zranb3	0.758298	5.26317	2.8e-08	4.86e-07
Fignl1	1.13496	3.78572	2.84e-08	4.9e-07
Cx3cr1	2.83567	-0.151668	2.83e-08	4.9e-07
Uhrf1	1.12151	5.08156	2.9e-08	5e-07
Mis18bp1	1.12485	4.10701	2.94e-08	5.07e-07
Pclaf	1.24662	4.81935	2.99e-08	5.14e-07
Igsf8	-0.819183	5.80666	3e-08	5.16e-07
Lrrc8b	-0.546442	5.09276	3.12e-08	5.36e-07
Scimp	-2.54688	0.421635	3.24e-08	5.56e-07
Irs1	-2.88408	-0.291404	3.35e-08	5.73e-07
Ifit3	1.26549	3.52301	3.36e-08	5.75e-07
Mcm10	1.18563	3.58792	3.49e-08	5.97e-07
Ralgapa2	0.541239	5.2162	3.51e-08	5.98e-07
Brip1	0.997141	3.67774	3.55e-08	6.04e-07
Nudt19	-0.505264	4.29661	3.6e-08	6.12e-07
Rad51	1.20226	3.67874	3.6e-08	6.12e-07
Sgo1	1.3766	2.60921	3.62e-08	6.14e-07
Ckap2l	1.2421	4.107	3.73e-08	6.33e-07
Arhgef39	1.29502	1.79034	3.87e-08	6.54e-07
Clec4n	1.1128	4.7623	3.9e-08	6.58e-07
Stab2	-0.733012	5.1027	3.93e-08	6.62e-07
Socs3	-2.33039	0.0726791	4e-08	6.73e-07
Foxm1	1.23657	4.19606	4.03e-08	6.77e-07
Col16a1	-2.74592	-0.0842902	4.16e-08	6.99e-07
Maf	0.659459	8.42206	4.2e-08	7.04e-07
Prkcd	-0.526236	8.37878	4.35e-08	7.28e-07
Rad54b	1.44639	2.28648	4.36e-08	7.29e-07
Ube2c	1.14705	4.05131	4.43e-08	7.39e-07
Zbtb16	1.79926	0.792247	4.5e-08	7.5e-07
Zwilch	0.964501	3.8788	4.53e-08	7.53e-07
Dlg3	-0.632901	4.41409	4.54e-08	7.54e-07
Pilrb1	2.05321	0.834372	4.57e-08	7.59e-07
Lpcat2	0.911014	4.35144	4.61e-08	7.64e-07
Nxpe1-ps	1.35708	1.37113	5.1e-08	8.42e-07
Map7	-0.907658	2.29608	5.2e-08	8.58e-07
Rrm2	1.15714	5.2237	5.24e-08	8.64e-07
Adgrf5	-2.5645	0.28373	5.64e-08	9.25e-07
Ncam1	-2.08074	0.268735	5.67e-08	9.29e-07
Pgap1	-0.661272	7.82601	5.78e-08	9.45e-07
Kmt5a	-0.52649	6.5615	5.8e-08	9.47e-07
Slc28a2	0.580313	4.79328	6.26e-08	1.02e-06
Adam19	-1.96274	4.69881	6.29e-08	1.03e-06
Egfr	-1.48909	0.851848	6.56e-08	1.07e-06
Gm14221	1.43074	2.24586	6.57e-08	1.07e-06
Irf4	-1.53595	1.71458	6.66e-08	1.08e-06
Tk1	0.88796	4.20572	6.82e-08	1.11e-06
Cped1	1.10998	2.32281	7.01e-08	1.14e-06
Acox3	-0.550301	7.16455	7.14e-08	1.15e-06
Diaph3	1.00972	4.69197	7.09e-08	1.15e-06
Spag5	1.26507	3.78879	7.31e-08	1.18e-06
Smc2	0.883978	5.94797	7.58e-08	1.22e-06
Ahnak	-0.509867	10.726	7.75e-08	1.25e-06
Dnmt1	0.580746	7.0988	8.17e-08	1.31e-06
Slc39a8	0.687764	4.01013	8.21e-08	1.31e-06
Ect2	1.09151	4.19203	8.14e-08	1.31e-06
Armcx6	1.71768	1.45257	8.2e-08	1.31e-06
Rhoc	-0.630667	6.6029	8.23e-08	1.32e-06
Pbk	1.26074	3.57256	8.29e-08	1.32e-06
Rars	-0.525022	6.73259	8.31e-08	1.33e-06
Zfp532	-0.959618	2.53438	8.5e-08	1.35e-06
Cxcl10	2.24938	0.0587174	8.47e-08	1.35e-06
Tpx2	0.941458	5.41	8.8e-08	1.4e-06
Plk1	1.15562	3.88025	9.36e-08	1.48e-06
Tapbp	-0.624205	8.10811	1.01e-07	1.6e-06
Cdca3	1.16738	4.25777	1.04e-07	1.64e-06
Ghr	-2.18334	0.143858	1.06e-07	1.68e-06
Gm15760	-1.07893	2.09372	1.07e-07	1.69e-06
Gen1	1.18581	3.29152	1.1e-07	1.74e-06
Pdgfa	-0.553867	4.41598	1.15e-07	1.8e-06
Cenph	1.21213	2.1615	1.24e-07	1.94e-06
Jcad	-0.810242	3.93815	1.29e-07	2.02e-06
Rad18	0.868817	3.5027	1.31e-07	2.04e-06
Arhgef7	0.534532	7.19193	1.32e-07	2.05e-06
Mybl2	1.30185	2.71193	1.36e-07	2.11e-06
Kif14	1.36712	3.00152	1.37e-07	2.12e-06
Pmaip1	0.560177	4.19919	1.44e-07	2.23e-06
Mmp2	-1.65534	0.683565	1.47e-07	2.26e-06
Cisd1	-0.873675	4.1857	1.46e-07	2.26e-06
Tgfb2	-2.17751	0.13075	1.51e-07	2.32e-06
Cep85	0.664693	5.6832	1.54e-07	2.37e-06
Gm14548	0.869193	5.68491	1.57e-07	2.41e-06
Plod3	-0.589409	6.65223	1.7e-07	2.6e-06
Msrb3	-1.96469	0.263218	1.83e-07	2.79e-06
Stap1	0.709497	6.73872	1.83e-07	2.79e-06
Rgs18	0.740387	5.51827	1.95e-07	2.96e-06
Adamts2	-2.01499	0.429547	2.05e-07	3.1e-06
Pla2g5	-1.98523	1.05076	2.09e-07	3.16e-06
Lfng	0.584025	4.97396	2.1e-07	3.17e-06
Myef2	0.680445	4.52336	2.13e-07	3.21e-06
Fscn1	-1.39827	1.66307	2.14e-07	3.23e-06
Cadm1	-1.66462	7.64211	2.18e-07	3.28e-06
Ttc39b	-0.663768	5.85206	2.31e-07	3.47e-06
Fastkd3	0.586941	3.75952	2.47e-07	3.7e-06
Prps1	-0.906636	3.80816	2.57e-07	3.83e-06
Gpr65	-0.568152	6.54597	2.58e-07	3.85e-06
Tlr8	-0.562609	8.47053	2.61e-07	3.89e-06
Tmem144	-0.554908	4.53738	2.67e-07	3.96e-06
Nuf2	1.217	4.14173	2.7e-07	3.99e-06
Nbeal2	0.612244	5.12389	2.7e-07	4e-06
Gm49125	-1.93349	1.18624	2.79e-07	4.12e-06
Il1r1	-1.76191	0.477842	2.8e-07	4.12e-06
Pmf1	0.780188	3.39449	2.8e-07	4.12e-06
Oas2	1.16671	3.76676	2.8e-07	4.12e-06
Tmsb4x	0.53263	11.0258	2.85e-07	4.18e-06
Dtl	1.11877	3.52961	2.87e-07	4.21e-06
Cep170b	0.532046	4.33671	2.9e-07	4.24e-06
Nxn	-1.33042	1.80536	3.08e-07	4.5e-06
Plaur	-0.503188	5.32362	3.11e-07	4.54e-06
Map4k2	0.60358	3.67207	3.15e-07	4.6e-06
Pcolce	-1.25208	1.1268	3.21e-07	4.66e-06
Lilrb4a	1.07298	9.04126	3.2e-07	4.66e-06
Cip2a	0.949476	4.32613	3.29e-07	4.77e-06
Shcbp1	1.21186	3.23688	3.32e-07	4.81e-06
Igsf9	1.75413	0.305039	3.47e-07	5.03e-06
Tacc3	0.785254	4.80308	3.5e-07	5.06e-06
Psip1	0.854173	4.45013	3.56e-07	5.14e-06
Tmem171	0.979263	2.90876	3.6e-07	5.19e-06
B430306N03Rik	-0.888097	6.92505	3.91e-07	5.6e-06
Slfn9	0.923591	5.70882	3.9e-07	5.6e-06
Cdca7l	0.653674	4.83193	4e-07	5.72e-06
Olfr1438-ps1	-1.94981	1.5591	4.06e-07	5.8e-06
Prim1	0.975637	3.1229	4.08e-07	5.83e-06
Tmpo	0.763205	6.53407	4.15e-07	5.91e-06
Tnni2	1.33581	1.52186	4.17e-07	5.94e-06
Sdc2	-2.08204	1.09904	4.19e-07	5.96e-06
E2f8	1.03322	3.97611	4.2e-07	5.97e-06
Ska2	1.09477	3.24069	4.27e-07	6.06e-06
Nlrp1c-ps	1.05701	2.59115	4.45e-07	6.31e-06
Evi2	0.775566	4.3512	4.54e-07	6.42e-06
Kif2c	1.2738	3.58631	4.63e-07	6.54e-06
Creb3l2	-0.585152	4.524	4.75e-07	6.68e-06
St6galnac4	-0.700744	6.07288	4.79e-07	6.72e-06
S100a4	0.856444	6.38444	4.91e-07	6.89e-06
Tmem37	-1.0261	3.99299	5e-07	6.98e-06
Ksr1	-0.744439	2.62781	5.05e-07	7.05e-06
Abcg3	0.78134	3.4387	5.06e-07	7.05e-06
Nlrc3	0.689166	3.49721	5.1e-07	7.11e-06
Slc27a1	0.575007	6.51957	5.21e-07	7.25e-06
Tubb2b	1.14219	1.87517	5.35e-07	7.43e-06
Pi4k2a	-0.603544	7.38657	5.55e-07	7.69e-06
Tmem243	0.516744	3.78814	5.79e-07	8.01e-06
Cmklr1	-1.10913	5.05536	5.83e-07	8.04e-06
Fam111a	0.651251	7.20279	5.83e-07	8.04e-06
Asb4	-0.789048	3.06202	5.95e-07	8.18e-06
Gm6377	1.52223	2.59903	6.01e-07	8.25e-06
Mrgpre	-0.553078	4.46487	6.08e-07	8.34e-06
Id3	1.58946	0.998998	6.2e-07	8.49e-06
Mpp7	-1.51939	2.58852	6.48e-07	8.85e-06
Ppp1r13b	0.570918	4.19264	6.48e-07	8.85e-06
Actg2	-2.47383	-0.295413	6.79e-07	9.25e-06
Ccl3	0.853615	5.54272	6.82e-07	9.28e-06
Cdkn2c	0.923562	4.25608	6.87e-07	9.34e-06
Ptk7	-2.45494	-0.0989429	6.93e-07	9.4e-06
Cenpk	1.17799	2.12776	6.93e-07	9.4e-06
Robo1	-2.68634	-0.199734	7e-07	9.48e-06
Kcnn4	0.633134	5.80596	7e-07	9.48e-06
Slc27a6	-2.09171	0.0320689	7.09e-07	9.59e-06
Cenpn	1.07129	2.62063	7.19e-07	9.71e-06
Spdl1	0.870191	4.69194	7.23e-07	9.74e-06
Malt1	-0.565786	5.7145	7.37e-07	9.93e-06
Ncapd3	0.62374	4.45328	7.39e-07	9.95e-06
Tspan14	-0.518202	7.07794	7.43e-07	9.98e-06
Insig1	-0.52583	6.26067	7.47e-07	1e-05
Mgll	-0.961462	7.56502	7.56e-07	1.01e-05
Apbb1ip	0.552855	7.90221	7.52e-07	1.01e-05
Bard1	1.11726	2.70602	7.52e-07	1.01e-05
Fyco1	-0.839222	5.96723	7.75e-07	1.03e-05
Camsap3	1.89662	0.0936973	7.67e-07	1.03e-05
Cdca7	1.05179	2.76305	7.79e-07	1.04e-05
Melk	1.17543	3.28662	7.84e-07	1.04e-05
Ezh2	0.886765	4.29113	7.9e-07	1.05e-05
Mcm4	0.593612	5.66924	8e-07	1.06e-05
Gm47547	-2.81872	-0.12491	8.06e-07	1.07e-05
Incenp	0.690551	6.03908	8.03e-07	1.07e-05
Cdc25b	0.918899	4.15647	8.06e-07	1.07e-05
Chaf1a	0.762944	4.41306	8.33e-07	1.1e-05
Ncapg	1.03241	4.00454	8.47e-07	1.12e-05
C030034L19Rik	1.17842	1.3901	8.51e-07	1.12e-05
Sgip1	-1.3378	2.24665	8.67e-07	1.14e-05
Fcgr3	-0.500764	9.2062	8.77e-07	1.15e-05
Rtl6	-0.924074	2.20116	8.9e-07	1.16e-05
Fbxl4	0.679055	3.45888	8.89e-07	1.16e-05
Ccnf	0.876953	4.03771	8.82e-07	1.16e-05
Pmp22	0.521934	8.76947	8.94e-07	1.17e-05
Mastl	1.23025	3.72224	9.33e-07	1.22e-05
Wdr91	-0.517765	7.03296	9.72e-07	1.27e-05
Adgra2	-1.43853	0.547096	1.06e-06	1.37e-05
Cln6	0.501899	5.66357	1.13e-06	1.46e-05
Lif	-2.45381	-0.111831	1.19e-06	1.54e-05
Maff	-1.21215	1.39663	1.2e-06	1.55e-05
Phf19	1.23772	2.67539	1.21e-06	1.56e-05
Ccdc18	1.48216	1.17231	1.23e-06	1.59e-05
Pola1	0.816718	4.71062	1.25e-06	1.6e-05
Ccnb1	1.01909	4.58695	1.25e-06	1.6e-05
Kif18b	1.23991	2.49259	1.24e-06	1.6e-05
Nfatc2	0.546268	4.97704	1.28e-06	1.64e-05
Sh3tc1	-0.613422	5.36448	1.31e-06	1.67e-05
Mitf	-0.520455	7.26153	1.3e-06	1.67e-05
Nt5dc3	-0.52448	5.50702	1.31e-06	1.68e-05
Rgs2	0.579712	7.09611	1.32e-06	1.68e-05
Gm15655	0.667133	4.64827	1.32e-06	1.68e-05
Abca9	0.783607	4.10593	1.36e-06	1.73e-05
Hgsnat	-0.82337	6.51016	1.37e-06	1.74e-05
Socs1	-2.26748	0.912108	1.4e-06	1.77e-05
Chn2	0.83587	3.25065	1.52e-06	1.93e-05
Cd320	-0.961028	2.15552	1.56e-06	1.98e-05
Nptx1	2.47934	2.76125	1.57e-06	1.98e-05
Lss	-0.53867	4.07087	1.62e-06	2.04e-05
Tenm4	-1.57336	3.19644	1.66e-06	2.09e-05
Kif22	1.06863	3.46684	1.69e-06	2.12e-05
Abca8b	1.24947	1.76745	1.68e-06	2.12e-05
Ankrd28	0.507063	6.18608	1.71e-06	2.14e-05
Pdpn	-0.885784	4.43131	1.72e-06	2.15e-05
Rnd3	1.16491	1.7655	1.72e-06	2.15e-05
Rad51ap1	1.22439	2.83989	1.72e-06	2.15e-05
Apln	-1.87796	0.543224	1.73e-06	2.16e-05
Tsc22d3	-0.529601	6.2205	1.75e-06	2.18e-05
Dram1	-0.631758	5.13879	1.87e-06	2.32e-05
Evi2b	0.813203	7.65505	1.86e-06	2.32e-05
Rhbdf2	-0.561246	5.14166	1.88e-06	2.33e-05
H2-DMa	-0.822281	3.38773	1.95e-06	2.42e-05
Sdc1	-0.828414	5.49	1.98e-06	2.45e-05
Mcm2	0.651463	5.20904	2.03e-06	2.51e-05
Rasgrp1	-2.43027	-0.0579356	2.07e-06	2.56e-05
H2-K1	-0.51211	9.04539	2.08e-06	2.57e-05
Fanci	1.09998	2.79791	2.18e-06	2.68e-05
Platr25	0.755587	3.11245	2.26e-06	2.78e-05
Adra1a	0.544063	5.60008	2.27e-06	2.79e-05
Nek2	1.17564	3.45131	2.34e-06	2.87e-05
Lurap1l	-2.55503	-0.268425	2.42e-06	2.97e-05
Zbtb5	-0.605083	3.5021	2.43e-06	2.98e-05
Gm47761	1.57814	2.81224	2.44e-06	2.98e-05
Pot1b	0.622202	3.90873	2.49e-06	3.04e-05
Cd164	-0.51221	7.56264	2.5e-06	3.05e-05
Ccnd3	0.824884	3.82674	2.55e-06	3.11e-05
Tceal8	-0.700287	6.32255	2.61e-06	3.18e-05
Rxra	-0.508959	6.4272	2.64e-06	3.22e-05
Tmem176b	0.859483	2.96494	2.69e-06	3.27e-05
Pex11a	-0.700108	2.58123	2.73e-06	3.31e-05
Tent5a	-0.550363	6.05429	2.75e-06	3.34e-05
Chek1	1.16366	2.28394	2.79e-06	3.38e-05
Pimreg	1.1866	3.15076	2.8e-06	3.38e-05
Fads3	-0.772162	2.95225	2.81e-06	3.4e-05
Gpx4	-0.525511	7.99409	2.85e-06	3.44e-05
Pola2	0.691876	3.88655	2.86e-06	3.44e-05
Rgs16	-1.06136	2.20064	2.91e-06	3.49e-05
Ifitm3	0.982327	5.09576	3.01e-06	3.61e-05
Itga9	0.606561	3.53582	3.15e-06	3.76e-05
Cdkn3	1.41578	1.87078	3.14e-06	3.76e-05
Sesn3	0.581173	3.85628	3.2e-06	3.82e-05
Pole2	0.788169	2.43419	3.21e-06	3.83e-05
Dnajc9	0.562643	4.60955	3.22e-06	3.84e-05
BC021767	-1.83436	0.934083	3.24e-06	3.85e-05
Ticrr	0.991571	2.58931	3.26e-06	3.87e-05
Tspan17	-0.694231	4.48873	3.29e-06	3.9e-05
Prag1	0.887274	2.01049	3.36e-06	3.99e-05
Gm42860	-0.68957	7.06328	3.38e-06	4.01e-05
4933439C10Rik	0.988935	2.13001	3.43e-06	4.06e-05
Tacc2	-0.680472	3.78645	3.55e-06	4.2e-05
Cd33	0.821892	3.81716	3.61e-06	4.26e-05
Cit	1.16944	3.56035	3.62e-06	4.26e-05
Itga1	-1.36858	0.985999	3.62e-06	4.27e-05
Rnd2	-0.854261	2.32934	3.74e-06	4.41e-05
Phka1	0.603154	3.09395	3.79e-06	4.45e-05
D430020J02Rik	1.25276	1.51945	3.79e-06	4.45e-05
St6galnac6	-0.608341	4.98532	3.9e-06	4.57e-05
Nsl1	0.77679	2.97083	3.95e-06	4.63e-05
Hells	0.925006	3.87396	4.14e-06	4.83e-05
Slfn10-ps	0.605343	4.93586	4.22e-06	4.92e-05
Hsd17b7	-0.782279	3.63433	4.3e-06	5e-05
Il12rb2	0.847653	3.8517	4.3e-06	5e-05
Aurka	0.910219	3.45354	4.33e-06	5.03e-05
Tst	-1.00698	1.9538	4.37e-06	5.07e-05
Esco2	1.33611	2.78529	4.39e-06	5.1e-05
Pdlim1	-1.82215	0.753406	4.86e-06	5.62e-05
Tfdp2	0.562441	3.65558	4.88e-06	5.64e-05
Fkbp9	-0.507108	4.49384	4.92e-06	5.68e-05
Fbxo5	1.13453	3.08065	4.95e-06	5.7e-05
Fhod1	0.555511	4.45456	5e-06	5.76e-05
Gtse1	0.886609	3.20891	5.05e-06	5.81e-05
Dock3	-1.08584	2.70795	5.29e-06	6.07e-05
Tcf19	1.19072	2.61776	5.31e-06	6.08e-05
Plod2	-1.17619	1.78572	5.44e-06	6.21e-05
Zfyve28	0.596917	4.39472	5.45e-06	6.22e-05
Slc30a4	-0.541521	5.029	5.51e-06	6.28e-05
Cdca8	0.941032	4.04803	5.87e-06	6.68e-05
Tex9	-1.98383	1.19397	5.91e-06	6.72e-05
Dmxl2	-0.556339	6.53208	5.94e-06	6.75e-05
Hebp1	-0.623542	4.58677	6.08e-06	6.9e-05
Wwc1	-2.59217	-0.351681	6.16e-06	6.98e-05
Ly75	-1.45533	2.01299	6.23e-06	7.06e-05
Snai2	-2.63263	-0.0447453	6.38e-06	7.2e-05
Gm6545	-1.98129	0.212198	6.47e-06	7.3e-05
Ppbp	-1.37413	2.49916	6.55e-06	7.37e-05
Dennd2c	1.03111	2.35987	6.64e-06	7.46e-05
Plcb2	0.831038	4.43313	6.67e-06	7.5e-05
Cmah	1.07034	3.02012	6.69e-06	7.51e-05
Kifc1	1.11452	3.58452	6.86e-06	7.7e-05
Pglyrp1	-1.37458	1.44907	6.88e-06	7.71e-05
Pde1b	0.546873	5.22246	7.41e-06	8.26e-05
Gadd45g	-0.728896	3.52048	7.59e-06	8.45e-05
Gm6209	-0.984308	2.3928	7.77e-06	8.64e-05
Bora	0.803621	2.55561	7.86e-06	8.73e-05
Kif26b	-2.26422	-0.429491	7.99e-06	8.87e-05
Mbd4	0.546778	3.16958	8e-06	8.87e-05
Cdk5rap1	-0.798683	3.16169	8.05e-06	8.92e-05
1700025G04Rik	0.900376	3.01835	8.17e-06	9.04e-05
Fcgr4	-0.588534	6.71182	8.28e-06	9.14e-05
Htr2a	-0.981082	2.67493	8.54e-06	9.4e-05
Rnf157	0.539904	4.4725	8.6e-06	9.45e-05
Cenpq	1.07955	3.09292	8.59e-06	9.45e-05
Osgep	-0.51368	4.75491	8.8e-06	9.65e-05
Akr1b8	0.543341	4.83866	8.93e-06	9.77e-05
Dab2	0.799859	9.26918	8.92e-06	9.77e-05
Efcab11	1.32204	1.37729	8.98e-06	9.82e-05
Gm4739	1.2021	2.99197	9.15e-06	9.97e-05
Vma21	0.688402	6.63176	9.26e-06	0.0001008
Pip4p2	-0.500795	6.00787	9.43e-06	0.000102633
Syce2	0.773305	2.80368	9.7e-06	0.000105502
Dchs1	-0.960255	1.68611	9.73e-06	0.00010571
Ece1	0.719884	4.72453	9.81e-06	0.000106435
Pdgfc	-0.64191	5.07048	9.97e-06	0.000108105
Dsn1	0.808784	2.67095	1.01e-05	0.000109059
Pla2g16	-0.896256	1.89771	1.03e-05	0.000110781
Cebpa	-0.629787	7.59948	1.03e-05	0.000110908
Pcdh1	-2.07495	-0.303562	1.04e-05	0.000111655
Cacna1a	0.591049	5.07439	1.08e-05	0.000115946
Ercc6l	0.944662	3.61532	1.08e-05	0.000115946
Gm13012	1.83732	0.493103	1.09e-05	0.000117187
Npl	-0.539373	3.95687	1.1e-05	0.000117667
Ttk	1.02625	2.87041	1.16e-05	0.000124533
Myo1b	0.58513	3.77289	1.17e-05	0.000125643
Fgf13	1.14179	1.1666	1.21e-05	0.000128971
Ppargc1b	-1.06249	1.46119	1.23e-05	0.000131213
Mmp14	-0.961155	5.20938	1.25e-05	0.000132862
Trim29	-1.53411	0.485003	1.27e-05	0.000134812
Galnt12	0.571062	3.12754	1.27e-05	0.000134812
Tonsl	0.971552	2.265	1.29e-05	0.000136572
Fam83d	1.3665	1.13518	1.31e-05	0.000138961
Rpa2	0.811795	3.68021	1.32e-05	0.000140115
Trip13	0.884353	2.63131	1.35e-05	0.000142393
Il12rb1	-1.94524	-0.0597761	1.35e-05	0.000142395
Nt5dc2	0.675313	5.08334	1.37e-05	0.000144926
Daglb	-0.553475	7.95584	1.38e-05	0.000145053
Nhsl2	0.878941	2.44693	1.38e-05	0.000145059
Wdhd1	0.591178	4.53033	1.39e-05	0.000145954
Spred3	1.02135	1.44497	1.41e-05	0.000147523
Lrig1	1.14054	0.969461	1.42e-05	0.000149031
Plekhh2	1.09961	2.1245	1.43e-05	0.000150404
Olr1	-1.89176	-0.233376	1.46e-05	0.000153079
Pif1	1.13789	1.66981	1.48e-05	0.000154547
Marchf10	-2.53079	0.131774	1.49e-05	0.000156133
Treml2	-1.01264	1.73664	1.5e-05	0.000156814
9930111J21Rik1	0.721204	3.82704	1.52e-05	0.000158901
Il16	0.823967	3.44433	1.53e-05	0.000159909
Gemin4	-7.25041	0.799112	1.55e-05	0.000161212
Tnfrsf23	-0.618813	3.74591	1.57e-05	0.000162687
Ncf4	-0.501616	6.14022	1.58e-05	0.000163356
Pilrb2	1.56673	1.44482	1.59e-05	0.000165063
Dpp7	-0.511747	6.09407	1.63e-05	0.000169118
Rhoh	-0.56548	3.62871	1.65e-05	0.000170162
Ifit1bl1	1.81984	0.470866	1.65e-05	0.000170312
Bub1	1.05981	4.20462	1.69e-05	0.000174788
Rad51c	1.434	0.706171	1.69e-05	0.000174812
Evl	-0.505703	8.58412	1.71e-05	0.000176736
Aldh1l1	-0.612505	3.73516	1.74e-05	0.000179082
Cd38	-1.54303	2.18003	1.75e-05	0.000179602
Slamf6	-1.71468	0.39009	1.79e-05	0.000184119
Oip5	1.04606	2.02445	1.82e-05	0.000186995
Nrm	0.839603	2.94712	1.83e-05	0.000187553
Mgst3	0.646304	4.01578	1.84e-05	0.000188631
Ica1	1.04813	1.54969	1.93e-05	0.000197145
Gmds	0.821909	2.67269	1.94e-05	0.000198178
Xkr5	1.87846	-0.0131163	1.99e-05	0.000202854
Ddx11	0.761887	2.98367	2.02e-05	0.000205793
Stat4	2.00706	0.510695	2.05e-05	0.000208283
Ankrd55	-0.845399	3.03644	2.07e-05	0.0002099
2700099C18Rik	1.14086	1.72965	2.12e-05	0.000214527
Slc46a3	-0.5289	6.18698	2.19e-05	0.00022135
Il18bp	-0.787293	3.62597	2.2e-05	0.00022215
Azin2	-1.19024	1.16614	2.22e-05	0.000223825
Vipr1	-1.4612	1.20789	2.23e-05	0.000224923
Cks2	0.784406	2.70662	2.24e-05	0.000225208
Susd1	0.597424	3.17406	2.3e-05	0.000231325
Ccne2	1.15426	4.0899	2.37e-05	0.000237457
Pcyox1l	-0.785232	2.7114	2.42e-05	0.000242384
Ogfrl1	0.575429	4.77204	2.44e-05	0.000244278
Atp2a3	1.04432	3.75295	2.47e-05	0.000246032
Camk2b	-1.12091	2.04244	2.49e-05	0.000247878
Smagp	0.622659	3.27354	2.5e-05	0.000249123
Iah1	-0.564147	4.65965	2.51e-05	0.000249919
Cgn	-1.68157	1.09168	2.56e-05	0.000254718
Lbr	0.527381	4.52944	2.6e-05	0.000258056
Gm43900	-1.86873	0.178415	2.62e-05	0.000259805
Treml4	1.35008	1.09202	2.64e-05	0.000261905
Pecam1	-0.985327	1.86432	2.69e-05	0.00026626
Chaf1b	0.697346	3.73699	2.72e-05	0.000268785
Aunip	1.28631	1.02414	2.91e-05	0.00028664
Fanca	0.859326	2.56458	2.97e-05	0.00029185
Adgre5	-0.557502	7.13893	2.99e-05	0.000293875
Slc43a3	0.765319	3.31692	3e-05	0.000294431
Gm5086	0.743601	2.20284	3e-05	0.00029453
Ifit2	0.938905	4.69825	3.02e-05	0.000295939
Scube3	-1.73765	0.328069	3.04e-05	0.000297251
Tgfbr3	-0.777654	2.12146	3.19e-05	0.000311054
Ltbp1	-0.911162	2.02263	3.19e-05	0.000311718
Ccdc14	0.753793	2.2697	3.21e-05	0.000312818
Mcoln3	0.622281	5.69729	3.21e-05	0.000313075
Gm45627	-0.723814	3.10397	3.27e-05	0.000318282
Cxcl16	0.592357	6.11055	3.29e-05	0.000319426
Phyhd1	-0.627811	2.93395	3.31e-05	0.000321147
Isyna1	-0.543666	4.96163	3.42e-05	0.000330526
Ier5l	-0.941155	2.75721	3.43e-05	0.000332107
H2-DMb1	-0.537443	4.29673	3.45e-05	0.000333073
Orc1	1.1257	1.53846	3.51e-05	0.000338166
Ehd3	-1.37267	0.639907	3.62e-05	0.000347172
Rhou	-0.82171	1.82545	3.66e-05	0.000350505
Prim2	0.619696	3.69202	3.75e-05	0.000358522
Pik3r3	-1.09063	1.17475	3.76e-05	0.000358876
Rasal3	-0.504796	3.92665	3.76e-05	0.000358876
Cysltr2	-1.03185	1.27136	3.77e-05	0.000359238
Depdc1b	1.20576	1.51408	3.8e-05	0.000361636
Olfml3	-1.65282	0.0461766	3.86e-05	0.000366926
Hey1	-1.07899	2.01093	3.87e-05	0.000367153
Cib2	-1.12571	2.0585	3.88e-05	0.000368051
Wdr76	0.586441	3.83039	3.9e-05	0.000369273
Fancd2	1.03319	2.89687	3.92e-05	0.000371406
Itga6	0.547348	7.10398	3.95e-05	0.000373163
Chml	0.628842	3.8757	3.96e-05	0.000373953
Pde7a	0.500929	4.17203	3.99e-05	0.000376431
Csrnp1	-0.82091	2.52592	4.03e-05	0.000380376
Lzts2	-0.925793	2.06354	4.07e-05	0.000384069
Heca	0.508609	4.87641	4.09e-05	0.000385086
Fzr1	0.537392	4.161	4.14e-05	0.000389564
Alox12	-1.40496	0.612018	4.15e-05	0.000389788
Pgm2l1	0.523849	5.19205	4.21e-05	0.000395399
Hdac9	1.21597	2.88376	4.22e-05	0.000395399
Lrr1	1.28023	1.17092	4.28e-05	0.000400814
Zcwpw1	1.04105	1.43072	4.29e-05	0.000402203
Amotl1	-1.38158	0.797741	4.33e-05	0.000404361
Haus4	0.635761	3.17297	4.41e-05	0.000410685
Akap12	-1.47373	0.754014	4.44e-05	0.00041314
Troap	1.19763	1.62035	4.58e-05	0.00042537
Dusp16	0.526361	3.44214	4.6e-05	0.00042718
Gm37199	-1.98494	0.014048	4.64e-05	0.000429791
Pla2g12a	-0.501356	3.25373	4.76e-05	0.000440611
Smpdl3b	1.42718	0.830738	4.9e-05	0.000452133
Cmbl	-0.811904	3.2164	4.9e-05	0.000452262
Ccr1l1	1.43636	0.151976	5.18e-05	0.000476355
Plk4	0.826088	3.8091	5.21e-05	0.000479404
Nsmf	-0.538524	3.88529	5.26e-05	0.000483213
Gm7935	5.49487	-0.36094	5.32e-05	0.000488437
Cenpi	0.931071	3.41646	5.48e-05	0.000501242
Capn5	0.556284	3.84008	5.64e-05	0.000515024
Apoe	-0.609352	11.9102	5.66e-05	0.000516658
Gm14461	-0.544795	4.32302	5.87e-05	0.000534943
Tyms	0.749623	3.19888	5.97e-05	0.00054306
Slco2b1	-0.907822	5.17876	6.01e-05	0.000546302
Nfkbiz	1.06526	1.52447	6.31e-05	0.000570901
Farp1	-1.42118	0.602113	6.6e-05	0.000596276
Klf11	0.646314	3.26809	6.91e-05	0.000623999
Gm42959	-1.07658	2.63893	7.06e-05	0.000635502
Rrad	1.50707	0.131411	7.14e-05	0.000641994
Nuak1	0.577625	3.66728	7.18e-05	0.000644758
Tnfsf10	1.46041	-0.0210455	7.25e-05	0.000649021
Lat	-0.76842	2.18633	7.31e-05	0.000653804
Gm45351	-1.85016	0.918752	7.39e-05	0.000660158
Gm37082	-1.93799	1.01744	7.42e-05	0.00066206
Sfxn5	0.543728	3.27397	7.5e-05	0.000667593
Smc4	0.623664	6.57493	7.52e-05	0.000669152
Cep70	0.540865	3.84082	7.56e-05	0.000672209
Calcrl	0.608788	5.837	7.58e-05	0.000673518
Hmgb2	0.703647	4.00502	7.84e-05	0.000696074
Hebp2	-1.53303	0.359537	7.88e-05	0.000698848
Slc16a14	-1.23571	0.70272	7.97e-05	0.00070585
9930111J21Rik2	0.711527	7.21491	7.98e-05	0.000706576
Tgfbr1	0.5033	7.53751	8.16e-05	0.000720395
Mapre3	-0.553299	2.92408	8.27e-05	0.000729142
Cdc45	0.773127	2.91983	8.29e-05	0.000730448
Dpy19l3	-1.57294	0.414309	8.38e-05	0.000738256
Tspan33	1.11149	1.02625	8.44e-05	0.00074306
Aurkb	0.921395	3.37951	8.57e-05	0.000752321
Chtf18	1.0212	1.9838	8.64e-05	0.000756837
Donson	0.576175	3.00626	9e-05	0.000785224
Tmem150b	1.05199	1.31727	9.15e-05	0.000795901
Gm15975	-6.51123	1.4018	9.45e-05	0.000820246
Gins1	0.761533	2.24351	9.61e-05	0.000832066
Ggct	-0.834579	1.90448	9.63e-05	0.000832721
Zdhhc2	1.30074	1.44431	9.68e-05	0.000836764
Depdc1a	1.15228	2.11751	9.92e-05	0.000854749
Stard13	-1.81641	-0.263759	9.98e-05	0.000859533
Ssbp3	0.578375	4.57687	9.98e-05	0.000859533
Cd24a	0.757197	3.40465	0.000100327	0.000863078
Dbf4	0.661607	4.38212	0.000105572	0.000906379
Gm38248	0.977468	1.82409	0.000106448	0.000912688
Prkaa2	-1.19381	1.23454	0.000108329	0.000926276
Gab3	0.530819	3.17465	0.000108286	0.000926276
Stk26	1.19082	0.779172	0.000108393	0.000926276
Mgp	-1.85711	-0.254004	0.000110849	0.000946005
Lpar2	1.21296	0.321848	0.000113272	0.000964122
Nup210	0.845364	2.07534	0.000115527	0.000982021
Nlgn2	0.662306	2.70491	0.000115857	0.000984168
Rhobtb3	-1.53533	0.246272	0.000124561	0.00105532
Clec2i	1.11786	1.33922	0.000124788	0.00105585
Bco2	1.08024	0.8306	0.000126298	0.00106793
Mcm8	0.699406	2.64193	0.000127713	0.00107848
Cd300ld	-0.508706	8.94879	0.00012888	0.00108619
Plpp3	-0.643362	4.5004	0.000131321	0.00110603
Epb41l3	-1.19811	3.45973	0.000131499	0.00110681
Glipr2	-0.811725	1.90343	0.000134965	0.00112869
Ccdc88a	-0.628145	6.96807	0.000134836	0.00112869
Morc4	0.983878	0.87927	0.000134935	0.00112869
Eml1	-2.02386	-0.311058	0.000135944	0.00113605
Spc24	0.902383	2.02147	0.000137632	0.00114941
Cchcr1	1.02588	1.49644	0.000143974	0.00119925
Zc3hav1l	0.974731	1.67713	0.000148418	0.00123467
Cntln	0.688642	3.32373	0.000153913	0.00127543
Gm40264	-1.46511	1.2069	0.000154216	0.00127712
Rpia	-0.50909	3.33448	0.00015491	0.00128148
Gm21961	-2.24654	0.509561	0.000155423	0.00128464
Gm37917	-0.88818	3.0232	0.000155723	0.00128629
Mxd3	1.66525	0.193987	0.000155909	0.001287
Gypc	-0.621636	3.00529	0.000159796	0.00131571
Atad5	0.650836	3.46733	0.000160367	0.00131956
Rasgrp3	0.989016	3.98302	0.000161745	0.0013292
Mex3b	0.990335	0.798362	0.00016244	0.00133406
Dnajc27	0.502902	3.04787	0.000162805	0.00133621
Nemp1	0.527625	3.67901	0.000163536	0.00134135
Hist2h3c1	6.26764	-0.225427	0.000164947	0.00135206
Rtkn	-1.14925	1.2659	0.000165161	0.00135295
Pcgf6	0.560435	2.63016	0.000169894	0.00138818
Pde3b	0.557984	3.62473	0.000170813	0.00139481
Osbpl5	-0.613592	2.52398	0.000172385	0.00140587
Mms22l	0.626217	3.34044	0.000172665	0.00140726
Cavin2	-1.61154	0.303023	0.000174502	0.00141999
Map1a	-1.6154	-0.0651573	0.000174818	0.0014212
Lockd	1.24827	1.04065	0.000181159	0.00146904
Btbd8	0.865343	1.85655	0.000182855	0.00148092
Sys1	-0.60065	3.67502	0.000185032	0.00149666
Ripk3	-0.612006	3.87354	0.000185491	0.00149943
H2afv	0.555545	3.84556	0.000189413	0.00152922
Itga2b	-1.00609	1.79638	0.00018983	0.00153162
5830444B04Rik	-0.994373	1.57584	0.000190656	0.00153732
Tgfb3	-1.80318	0.145024	0.000190975	0.00153893
Gm42047	1.25517	5.40406	0.000191819	0.00154379
H2-T24	-0.509486	3.72781	0.00019411	0.00156126
Ska3	1.04552	2.55755	0.000194436	0.0015629
Lysmd3	0.608907	4.27374	0.000196545	0.00157788
Arhgef17	-1.18536	0.597001	0.000202476	0.00161943
Impa2	0.79861	1.89154	0.000203561	0.0016271
Ifit3b	1.5188	1.29763	0.000205392	0.00164071
Thra	-0.534516	3.32079	0.000206071	0.00164511
AI839979	0.888372	1.85592	0.000206571	0.00164809
Zfp469	1.01566	0.757249	0.000209979	0.00167173
H2-Q6	-1.06592	0.917624	0.000213554	0.00169538
Kcnj2	0.506026	6.1002	0.000218886	0.00173557
Zgrf1	0.806974	2.95063	0.00021925	0.00173738
Crip2	-1.24825	0.381851	0.0002198	0.00174067
Efnb2	-1.40283	0.197254	0.000225051	0.00177787
Rilpl2	-0.50953	6.15412	0.000229345	0.00180736
Rims3	-0.863383	2.73726	0.000230751	0.00181732
Trpm2	0.7151	1.99517	0.000231759	0.00182414
Filip1l	0.748786	4.33858	0.000233033	0.00183305
Klhl23	1.03651	1.31195	0.000238758	0.00187465
Tm4sf19	-0.635226	3.42711	0.000239585	0.00187999
Chst3	0.571107	2.27147	0.000240551	0.00188642
E230032D23Rik	-1.27038	0.505283	0.000245124	0.00192111
Fsd1l	0.688101	2.9049	0.000245921	0.00192384
Dab2ip	-0.970944	1.34158	0.000246103	0.00192409
Gm49383	0.866407	2.16124	0.000247494	0.00193027
Kank2	0.546772	3.14069	0.000257916	0.00200185
Ptgs2	-1.56804	-0.0181096	0.00027051	0.00208325
Adamts14	-1.41238	-0.0517595	0.000271829	0.00209216
Rabgap1l	0.521563	3.9664	0.000275201	0.00211431
4930503L19Rik	0.507556	4.29416	0.000289537	0.00221783
Cenpm	1.30004	0.729787	0.000290419	0.00222326
Psd2	1.1812	0.188239	0.000290867	0.00222537
Gm43535	-0.841266	2.53421	0.000292688	0.00223797
Trim36	-0.525592	3.69671	0.000292959	0.00223871
Ednrb	-0.837898	5.58191	0.000293725	0.00224189
Haus6	0.512964	4.27358	0.000293623	0.00224189
Snx15	-0.512709	4.27311	0.000294955	0.0022462
Parpbp	0.840036	2.14279	0.000294987	0.0022462
Dennd2a	-0.605341	5.42717	0.000300156	0.0022815
Rgs11	1.35607	0.0423524	0.000300014	0.0022815
Vash2	0.640012	2.11595	0.00030299	0.00229897
Kif18a	0.950886	1.99124	0.000308158	0.00233405
Sapcd2	1.64069	0.143348	0.000312932	0.00236742
Itgal	0.607171	2.89348	0.000323813	0.00243969
Slc7a11	-0.528702	4.92491	0.000325443	0.00244767
Gm7160	-0.911399	1.05584	0.00032717	0.00245923
Rdh10	0.52259	2.87163	0.0003305	0.00248135
Pde3a	-1.50246	0.164522	0.000330931	0.00248314
Ahrr	-0.727446	3.00468	0.000338627	0.00253464
Hmga2	1.16729	6.4025	0.000339619	0.00253797
Ryk	-0.69095	2.08457	0.000358977	0.00267176
Gm7334	-1.24991	0.457275	0.000361172	0.00268655
Ube2t	0.917225	2.23273	0.000361425	0.00268687
C1ra	-0.724942	2.08942	0.00036188	0.0026887
Dnajb14	-0.539822	7.07386	0.000362894	0.00269467
Pold1	0.614319	3.5869	0.000368761	0.00273351
Stag3	1.26289	0.315662	0.000370261	0.00274305
Ccr7	1.49989	0.413754	0.000372488	0.00275479
Tmem38a	0.768801	1.71785	0.000375625	0.0027748
Zmynd15	0.959893	1.62249	0.000376589	0.00278032
Hmgn3	0.883832	1.90372	0.000389987	0.00286607
Pfn2	-0.671736	2.17789	0.000394875	0.00289592
Mis18a	0.514588	3.50896	0.000401657	0.00294008
Gpm6b	-1.45224	-0.0611062	0.000407974	0.00297615
Rtel1	0.534239	3.44535	0.000409978	0.00298907
Traf1	1.01742	0.707786	0.000415933	0.00302563
Entpd4b	-0.519618	3.34294	0.000416193	0.00302581
Jag1	0.652701	3.63536	0.000417872	0.00303458
Adamts9	-1.60847	-0.0261297	0.000421481	0.00305907
Serpine2	0.742362	3.63392	0.000427607	0.0031014
Bcl7a	0.675239	2.26414	0.000433879	0.00314196
Mapk11	1.09064	0.866679	0.000435392	0.00315114
Fbxo32	-0.94181	4.84742	0.000439647	0.00317479
Gja1	-1.05507	2.07925	0.000441788	0.00318534
Socs2	-1.32712	0.457171	0.000442871	0.00319091
Usp35	0.571829	2.59085	0.000446083	0.00321225
Plpp1	-1.52647	-0.0784456	0.000450229	0.00323848
Plau	0.565565	7.39892	0.000455118	0.00326516
Gm8181	-5.84049	-0.0771166	0.000462598	0.00331262
Clec10a	-0.631489	3.72311	0.000468537	0.0033477
Cysltr1	0.650836	3.42127	0.000471747	0.00336876
Prkca	-0.669698	2.38447	0.000475869	0.00339254
Lyz1	-0.649533	3.19148	0.000482647	0.00343347
Fkbp5	0.59412	3.18774	0.000482677	0.00343347
Nrgn	-1.16495	0.634219	0.000483434	0.00343695
Smtn	0.825934	2.11994	0.000494339	0.00350093
Eri2	0.529991	3.10076	0.000520211	0.00366398
Dctpp1	0.557549	2.48653	0.000521614	0.00367185
Cdca5	0.960296	2.55444	0.000525841	0.00369554
Ccr2	0.750545	3.20929	0.000528352	0.00370636
Dkk2	1.23963	0.120577	0.000527977	0.00370636
Plcb4	1.09507	0.477674	0.000534131	0.0037395
Selenoh	0.806995	3.23294	0.000534658	0.00374115
Trim16	0.530994	2.85791	0.000540123	0.00377734
Exo1	0.921163	2.26819	0.000543575	0.00379552
Ston1	-1.46205	-0.0695559	0.000544918	0.0038026
BC055324	0.838032	2.05459	0.000556126	0.0038766
Jsrp1	-1.28205	0.33912	0.000560659	0.00390334
Ralgps1	0.564124	3.2398	0.000560871	0.00390334
Zfp979	1.74799	0.00289304	0.000579173	0.00402417
Rhod	0.863922	1.49727	0.000579934	0.00402729
Tipin	0.52401	3.52921	0.000583374	0.00404899
Fam102a	0.551762	3.10592	0.000583844	0.00405006
Sass6	0.586082	3.31931	0.000589124	0.00408229
Hist2h3c2	-0.990747	1.05778	0.000598136	0.00412916
Rad51b	1.18191	0.487152	0.000603841	0.00416184
Eps8	-0.724939	3.39783	0.000620077	0.00426005
Gria3	-0.878128	1.15143	0.000623437	0.00428084
Gm15448	0.680121	2.36428	0.000624304	0.00428451
Arhgap28	-0.645861	1.98601	0.000655892	0.00447265
Erbb2	-1.3569	0.129394	0.000659527	0.00449506
Ms4a4c	1.29462	0.484731	0.00066974	0.00455502
Cks1b	0.64667	3.3702	0.000673099	0.00457302
BC030867	1.04163	1.77156	0.000681158	0.00462045
A530076I17Rik	-1.56816	0.0461641	0.000703898	0.00475464
Gins3	0.676233	2.29779	0.000731561	0.00492339
Gm16638	0.822885	1.134	0.000734363	0.00493967
Zfp229	0.743469	1.72108	0.00075683	0.00508813
Ptpn3	-0.83174	1.27988	0.000763095	0.00511687
Gm48368	-0.643387	3.46456	0.000776341	0.00519486
Gm20056	-0.603301	2.93719	0.00081993	0.00546379
4930523C07Rik	0.875263	1.03854	0.000848051	0.00563658
G2e3	0.517246	4.31891	0.000859647	0.00570187
Nos1	-1.42432	0.65438	0.000860205	0.00570263
Gvin1	-0.542035	6.92946	0.000864579	0.00572324
Ifi203-ps	1.09092	1.38656	0.000865225	0.00572411
Ccdc88c	-1.29916	1.14703	0.000886939	0.00585872
Arhgap33	1.15535	0.30412	0.000898118	0.00592647
Ccne1	0.675728	3.04703	0.000906414	0.00597508
Cd55	1.29486	0.740806	0.000907229	0.00597739
Timeless	0.658837	3.23545	0.000947617	0.00621801
Eme1	0.808668	2.0465	0.000952996	0.00625012
Lyzl4	-0.971856	1.42885	0.000957352	0.00627549
Spsb4	-0.548277	3.49698	0.000977131	0.00640187
Polq	0.710269	3.02122	0.000978885	0.0064101
Samsn1	0.528275	3.60341	0.00097958	0.00641139
Oas3	0.748498	4.16287	0.000994979	0.00650886
Mamdc2	-0.548659	5.8414	0.00100251	0.00654814
Cacna1d	-0.518359	4.09585	0.00100893	0.0065834
AC125351.1	1.06971	1.03538	0.00101793	0.00663537
Cenpl	0.663123	2.75781	0.00101893	0.00663854
Zfp523	-0.558184	2.83482	0.00102822	0.00669563
Fam110c	-0.732591	2.72335	0.00103428	0.00672833
Slc9b2	1.19295	0.843192	0.00103681	0.00674135
Gm16287	-0.603209	2.0675	0.00105297	0.00682592
Serpinb1a	1.03311	1.7458	0.001053	0.00682592
Pou3f1	-1.06247	2.24134	0.0010603	0.00686631
Ttc32	0.575372	2.18109	0.00108175	0.0069982
Stx1b	-1.26266	1.48466	0.00112379	0.00725194
St8sia4	-0.539709	6.74298	0.00115439	0.00742329
Vill	0.801702	2.12665	0.00115975	0.00745408
Tmem47	-2.02227	-0.498169	0.00119247	0.00763945
Magi3	0.513297	2.85382	0.00119473	0.00764831
Hirip3	0.663276	3.18959	0.001207	0.00772298
AC166110.3	0.86518	3.15998	0.00122517	0.00782756
Ccdc148	-0.701527	2.93394	0.00126337	0.00806361
Plxdc2	-0.575954	4.86511	0.00126773	0.00808742
Chd5	-1.41712	-0.0616664	0.00127412	0.00812015
Gm45799	1.12998	0.397311	0.00128271	0.0081668
Ltb4r1	-1.49135	-0.111847	0.00129634	0.00824542
Serpinb9b	-0.521666	2.98908	0.00130309	0.00828422
Gm45844	-1.13166	0.749824	0.001318	0.00837074
Mtmr11	1.09209	0.870892	0.001322	0.008392
Ankrd13d	0.600243	2.2364	0.00134914	0.00855162
Egr3	1.41799	-0.119108	0.00135358	0.00857325
Ddias	0.67772	2.49614	0.00137028	0.00866432
Celf4	-1.17329	1.15067	0.00142954	0.00900362
Msrb2	0.618975	2.04864	0.00143475	0.00903198
Casz1	-0.539972	2.634	0.00144072	0.00906512
Ldlrad4	-0.625528	2.09967	0.00144915	0.00910927
Uchl1	0.950513	0.766787	0.00147613	0.00926975
Rfc4	0.711545	2.56861	0.0015088	0.00943804
Matn2	0.87361	0.774152	0.00154711	0.00964019
Gm45234	0.736461	4.56406	0.00155632	0.00969287
Met	-0.721906	3.21594	0.00160444	0.00995884
Hist1h2ap	0.989868	2.55857	0.00161298	0.010007
9330182L06Rik	1.11063	0.620117	0.00162292	0.010059
Morn2	0.943174	0.527852	0.00162981	0.0100968
Slc22a23	-1.22926	0.0590328	0.00165041	0.0101999
Insl6	-0.64413	2.48043	0.00169447	0.0104571
Cep72	0.633037	1.86916	0.00171626	0.0105561
Camk2a	-0.734287	1.67275	0.00172922	0.0106206
Efemp2	-0.549048	2.77774	0.00176089	0.0108048
Arfgef3	0.630362	3.92715	0.00178794	0.0109603
Yes1	-1.36837	0.0905495	0.00181177	0.0110958
Tal1	0.5126	3.95563	0.00182432	0.0111673
Itgb7	0.64524	2.09209	0.00182647	0.0111752
Nek8	0.827825	0.82236	0.0018324	0.0112062
Rapsn	1.05601	0.686289	0.00183655	0.0112262
Dusp10	0.829099	1.11627	0.00184924	0.0112876
Eda2r	-1.24409	0.105306	0.00186228	0.0113479
Trpc4	-1.38089	-0.0912929	0.00186708	0.0113642
Pcdh7	0.577851	5.57302	0.00187061	0.0113803
Chpf	-0.935219	1.70529	0.00189866	0.0115182
Mical3	0.586118	2.16893	0.00192264	0.0116527
Ccdc15	1.00932	0.594638	0.00192594	0.0116617
Amigo1	0.657416	1.66715	0.00192712	0.0116634
Pgbd5	-0.686348	1.92145	0.0019343	0.0117013
A930007I19Rik	-0.87591	0.99588	0.00196725	0.0118839
Neurl1b	0.681601	1.71151	0.00197563	0.0119289
Traip	0.785795	1.5866	0.00198558	0.0119777
Clu	-1.20645	-0.10555	0.00200081	0.0120583
Mmrn1	-1.26209	0.617749	0.00203323	0.0122308
Cebpb	-0.506941	5.12202	0.0020887	0.012541
Angpt1	-1.03783	0.110697	0.00209028	0.0125446
Gcnt2	-0.815224	0.866893	0.00212325	0.0127059
Ap1s3	-0.530419	3.49588	0.00212487	0.0127059
Gm38246	1.20192	-0.0676981	0.00212505	0.0127059
Krt80	0.961949	0.697182	0.00213074	0.0127339
Klf12	-0.50834	3.17326	0.00213552	0.0127566
Rtp4	0.596603	4.09902	0.00214031	0.0127793
Nsg1	-1.15797	0.221143	0.00215134	0.0128332
Dgkeos	-2.92582	-0.257888	0.00215733	0.012857
Ccl2	-0.9886	4.79154	0.00215649	0.012857
Nat8l	-0.535771	3.75693	0.00216128	0.0128746
Bhlhb9	0.917758	1.02618	0.00216847	0.0129114
Bmt2	0.513257	6.54746	0.00224446	0.0133207
Lrrc1	-1.01769	0.457373	0.00225832	0.0133783
Kdr	0.679575	2.00498	0.00225798	0.0133783
B3gnt5	0.742708	1.65025	0.00227293	0.0134524
Per2	-0.733805	1.63756	0.00232043	0.0136895
Gm47445	-1.08176	0.336375	0.00233361	0.0137609
Frat1	0.75402	1.23832	0.00239634	0.0140856
Nptxr	0.712978	2.22054	0.00242858	0.0142426
Hyls1	0.579014	2.25757	0.00246277	0.0144299
Gm49378	3.81455	0.34595	0.0025172	0.014722
9930012K11Rik	0.992169	0.638657	0.00252717	0.0147736
Gm36079	-3.36587	-0.452802	0.00254525	0.0148725
Vsig10l	0.608394	1.73506	0.00255094	0.014899
Blm	0.508088	3.36727	0.00255838	0.0149357
Poc1a	0.55651	2.17696	0.00257479	0.0149974
Ptprv	1.08391	0.452442	0.00259405	0.0151004
Gm13212	0.844414	4.68566	0.00263459	0.015309
Fkbp14	-1.09333	0.23943	0.00265013	0.0153714
Mmp25	1.27104	0.141327	0.00265094	0.0153714
Serpinb1c	0.650508	2.54652	0.002704	0.0156438
Gbp6	-1.01063	1.45933	0.00271814	0.0157044
Slit1	0.534062	2.4376	0.00273422	0.015776
A130071D04Rik	-1.39913	-0.123829	0.00274281	0.0158185
Kiz	0.521518	2.86291	0.00276765	0.0159332
Foxd2os	0.962401	0.695819	0.00277008	0.01594
Gm12744	-1.76041	0.414275	0.00277366	0.0159491
Cbx6	0.723972	3.49031	0.00280694	0.0161161
Ttc39a	0.882149	1.04012	0.00281376	0.0161481
Spry3	1.01491	0.586847	0.00283822	0.0162811
Adcy6	-1.18	0.785961	0.00285431	0.0163662
Tedc1	0.88583	1.90892	0.00285691	0.0163738
Gm43940	-1.26979	0.000971071	0.00289142	0.0165347
Acot1	1.22901	0.381468	0.00289265	0.0165347
Kifc5b	1.24583	1.10241	0.0029179	0.0166639
Saa3	-1.12724	0.879694	0.00292301	0.0166857
Rbm38	0.670767	1.80731	0.00293602	0.0167376
Anks6	0.544752	2.02027	0.00295194	0.0167986
Clec4b1	0.69308	2.39622	0.0029515	0.0167986
Akap2	0.608474	4.0271	0.002987	0.0169606
AC131339.2	-1.24424	0.245111	0.00299579	0.0170031
Rexo5	0.530528	2.50451	0.00299766	0.0170062
Unc5b	-0.710077	1.68933	0.00301903	0.0171023
Gm17690	0.914951	0.508238	0.00303459	0.0171702
Kif24	0.609722	2.5235	0.00304178	0.0172033
Coq8a	0.717531	1.59829	0.00306153	0.0173074
Ocstamp	-1.38075	0.460972	0.0030862	0.0174239
4930579G24Rik	0.725575	2.39161	0.00308767	0.0174239
Gm45449	0.709656	1.42125	0.00319456	0.0179255
Cp	-0.586376	2.07565	0.00328343	0.0183521
Galnt15	-1.24492	-0.0450926	0.00328489	0.0183523
Acat2	-0.573037	2.875	0.00329048	0.0183676
Gramd4	-0.546944	3.04237	0.00334032	0.0186134
Spata13	0.678265	1.54535	0.00335159	0.0186682
Pex16	-0.516552	2.99875	0.00336479	0.0187234
Eldr	1.29262	0.173029	0.00336588	0.0187234
Epha2	-1.37153	-0.0982965	0.00340335	0.0189155
5930430L01Rik	-0.930608	0.335605	0.00344164	0.0190953
Pcdhgc3	0.522263	4.75084	0.00344899	0.0191279
Gm47031	-0.553499	4.0992	0.00346779	0.0192238
Syde1	-0.647148	1.94681	0.00347405	0.0192502
Slc9a5	0.837186	0.967677	0.00349177	0.0193401
Dclk2	1.09095	0.244008	0.00352743	0.0194873
Kit	0.718611	2.10152	0.00357122	0.0196953
Pim3	-0.610115	2.66651	0.00358765	0.0197436
Gm36161	-0.54555	5.72021	0.00366374	0.0201075
Btbd6	0.528743	2.54087	0.00371991	0.0203842
Oasl1	-1.30627	0.822223	0.00375056	0.0205259
C130026I21Rik	-0.723426	1.80665	0.00376449	0.0205934
Tube1	0.7491	1.53635	0.00385765	0.0210761
Gm42664	1.02974	0.882162	0.00391436	0.0213678
Zfp784	1.36548	0.486084	0.00393766	0.0214859
Gstp1	-0.641175	2.85533	0.00394484	0.0215068
Gm16712	0.969316	0.418373	0.00396969	0.021624
Gm44154	0.846654	0.981863	0.00399936	0.0217764
Gm38194	-0.624059	4.02004	0.00403534	0.0219358
H2afx	0.571039	3.68412	0.00408091	0.0221534
Shc4	0.685418	1.47156	0.00409578	0.0222167
H2-M2	0.844893	1.18497	0.00419222	0.022692
Ubtd2	-0.705793	1.3243	0.00420251	0.0227285
Zfp948	0.515449	3.2383	0.00422879	0.0228542
Celsr3	-0.528722	2.3654	0.00424202	0.022895
Map4k1	-0.511576	2.60776	0.00427598	0.023058
Cobll1	-0.977414	0.560121	0.00432034	0.0232582
Rundc3b	1.00371	0.409219	0.00435103	0.0234039
Zc3h6	0.553595	2.33815	0.00442518	0.0237501
Pgam2	-1.18966	0.0315083	0.00465439	0.0247765
Mybl1	0.754488	2.28271	0.00469669	0.0249914
Gm10693	1.04014	0.459442	0.0047009	0.0250034
Trp53cor1	0.769836	1.16585	0.00471794	0.0250837
Pex11g	-1.06811	1.07389	0.00480168	0.0255183
Hp	-0.881548	0.64665	0.00482939	0.02565
Raet1d	0.936428	2.10584	0.0048455	0.0257087
Zbtb8a	0.690389	1.48814	0.00497518	0.0262991
Galnt9	-0.970424	0.901479	0.00498756	0.0263537
Grap	0.703839	1.44371	0.00499006	0.0263561
Gm5141	0.75153	1.76851	0.00500209	0.0264019
Wdr31	-0.610293	2.89593	0.00505403	0.0266284
Gm13237	0.87635	3.18596	0.00513495	0.0270104
Igkc	-1.50864	1.23844	0.00518977	0.0272762
Thrb	-0.936635	0.346696	0.00519183	0.0272762
Arl6	0.60503	2.12552	0.00522883	0.0274482
Muc6	-0.938113	2.0981	0.00525526	0.0275756
Gm45752	0.965193	1.02701	0.00531928	0.0278321
Plxnb3	0.737255	1.05046	0.00535048	0.027984
Prrg4	1.12158	0.613909	0.0053991	0.0281832
Rgsl1	1.10474	0.665803	0.00541641	0.028214
Gm28800	1.54383	-0.0621433	0.00543394	0.0282939
Fndc10	-0.874711	0.656603	0.0054576	0.0283826
Gm45410	-0.87355	1.01617	0.00547793	0.0284768
Heg1	-0.739791	1.48009	0.00553863	0.0287459
Ctnnd2	1.23016	0.273666	0.00553682	0.0287459
Frat2	0.695347	1.7527	0.00555594	0.0288009
Col20a1	0.912781	0.376753	0.00555388	0.0288009
Gm12992	1.10402	-0.00358095	0.00555375	0.0288009
Card6	-0.528488	2.96222	0.00581117	0.0299189
Cenpp	0.877874	0.908617	0.00582922	0.0299998
1110032A03Rik	-0.518586	3.82807	0.00583831	0.0300226
Slc12a5	1.21867	0.0483525	0.00588913	0.0302312
Gm3325	0.801281	1.45521	0.00592526	0.0303847
Gm47567	-0.7737	1.39823	0.00597665	0.0305872
Bdh2	1.09713	0.0855769	0.00600402	0.0307008
Xlr3b	1.38476	0.642744	0.00604108	0.0308433
Septin5	-1.36168	-0.0604737	0.0061541	0.0313333
Hhat	-0.685228	1.10411	0.00618925	0.0314749
Gm37390	0.819939	1.06078	0.0062003	0.0315186
Gm47628	1.2888	1.29805	0.00622187	0.0316127
Mtss1l	-0.993266	-0.0169372	0.00623054	0.031626
Dzip3	0.502702	3.67622	0.00628498	0.0318609
Gdf3	-1.75936	2.10734	0.00629381	0.0318931
Raet1e	0.632113	2.6371	0.00632534	0.0320403
Gm1966	-0.69319	2.36047	0.00634873	0.0321208
Lgi4	-1.00491	0.41238	0.00644704	0.0325797
Rcn3	-0.849141	0.378026	0.006475	0.0326825
Gm9864	-0.637861	2.79903	0.00658882	0.0331735
Oaf	-0.609512	1.52653	0.00659488	0.0331735
Mfge8	0.566684	9.19032	0.00659549	0.0331735
Gm9796	0.667661	0.967837	0.006616	0.0332506
Dscc1	0.893275	0.97084	0.00666389	0.033439
Proser3	0.623904	1.32469	0.0067108	0.033635
Lca5	0.614616	1.70509	0.00672447	0.0336905
4930565N06Rik	1.12673	0.227606	0.00672934	0.0337017
Adgrg1	-0.776896	0.838665	0.00679483	0.0339816
I830077J02Rik	0.536779	2.43525	0.00694236	0.0344879
Ifit1	0.753262	2.8721	0.00694262	0.0344879
1700063D05Rik	-0.517967	3.20554	0.00720408	0.0356846
Pkd1l2	0.885798	0.522346	0.00720573	0.0356846
mt-Ty	0.659202	3.21804	0.00720913	0.0356877
Shmt1	0.521494	1.83444	0.00721824	0.0357053
Fuom	-0.673875	1.30967	0.00725241	0.035833
Angpt2	-0.738003	0.773815	0.00735223	0.0361975
Gm29666	-0.864187	1.12715	0.00741111	0.0364212
Gm44231	-0.608916	3.46378	0.00745225	0.0365535
Cldn34c1	0.503216	2.16038	0.00763916	0.0373564
Cbx7	0.523328	2.4582	0.00763902	0.0373564
Rnase6	-0.797793	1.26704	0.00769991	0.0375963
Bank1	0.799688	2.21315	0.00771638	0.0376567
Lbp	-0.955974	0.670867	0.0077747	0.0379055
Slco3a1	-0.56467	1.65154	0.0077848	0.0379173
Zfp580	0.897761	0.718531	0.00778331	0.0379173
Psmc3ip	0.656115	1.38778	0.00787156	0.0382496
Cnbd2	-0.716313	1.68617	0.00796352	0.0385567
Srgap3	0.670022	1.31262	0.00796558	0.0385567
Ung	0.649909	1.57079	0.00799239	0.038672
Slc25a35	-0.668937	1.38453	0.00807486	0.038983
Lyplal1	-0.674142	0.903538	0.00835219	0.0401874
Cpe	0.558705	4.70248	0.00835696	0.0401941
Cenpw	0.60249	1.68193	0.0083634	0.04021
Gm28424	-1.06317	-0.104709	0.0083829	0.0402586
Pask	0.657705	2.00545	0.00842959	0.0404526
Carmil1	0.537351	1.70086	0.00847672	0.0406181
Nynrin	-1.11228	0.417121	0.00849586	0.0406795
Sphk1	-1.11886	0.168408	0.00854843	0.0408704
Cdc42bpg	0.512628	2.11246	0.00855974	0.0408979
Batf2	-0.717887	1.02108	0.0086104	0.0410903
Zfp449	0.502593	1.97776	0.00860428	0.0410903
Gm48964	1.32732	0.0322026	0.00872882	0.0415629
Gm47652	-0.625874	4.12759	0.00900146	0.0427661
Gsta3	0.665465	1.98843	0.00902414	0.042858
Prrg1	-0.583472	3.02332	0.00905009	0.042902
Nr1d1	-0.565161	2.1194	0.00904885	0.042902
Dnph1	0.761106	1.03626	0.00910124	0.0430969
Arnt2	-1.10461	0.278343	0.00916583	0.0433548
Map7d3	1.03988	0.363521	0.0091837	0.0433953
Dusp8	0.71292	1.16129	0.00920128	0.0434426
Gm20412	-0.610372	3.13354	0.00922594	0.0435271
Cfap161	-0.896824	0.61261	0.00923479	0.0435528
Bdh1	0.858619	0.767085	0.00944145	0.0444623
F2rl2	-0.751352	0.777207	0.00946098	0.044538
Letm2	0.698635	1.26074	0.00947774	0.0446005
Gm16675	-0.698481	0.7565	0.00948784	0.0446317
Dhrs13	0.793788	0.852642	0.00950891	0.0446981
6720427I07Rik	-0.748414	1.52297	0.0095566	0.0448895
Gm38190	0.758186	0.893991	0.0095705	0.0449384
1700101I11Rik	-0.9812	0.34919	0.00964039	0.0452335
Mdm1	0.52072	2.02418	0.00967712	0.0453728
4933430I17Rik	-0.661081	1.25787	0.00973095	0.0456085
Gm37625	0.785102	1.03906	0.00973792	0.0456246
Gm38158	1.09642	0.486589	0.00979152	0.0458423
Gm45322	-0.619657	2.08042	0.00985668	0.046081
Syt8	0.812613	1.15913	0.00985684	0.046081
Gm43549	3.40072	0.310118	0.00988174	0.0461638
Abca5	0.621177	1.22393	0.0101043	0.0470326
Tmc8	0.709359	1.26932	0.0101154	0.0470674
M1ap	0.707008	1.44156	0.0104099	0.0482459
Tspoap1	0.51743	2.16398	0.0104223	0.0482856
Nradd	-0.740803	1.02641	0.0105884	0.0489495
Osgin1	-0.52677	3.19039	0.0107116	0.0494122
AW112010	-0.683573	2.09901	0.0107825	0.0496506
Frk	-0.806626	0.794295	0.0109095	0.0501277
Lzts3	0.661244	1.67759	0.0109245	0.0501784
5430416N02Rik	0.598464	1.72032	0.0110195	0.0505068
Mmp9	0.652142	4.12755	0.0113157	0.0515673
Abhd15	0.809291	1.5459	0.0113191	0.0515673
Ptges	-0.612049	1.51671	0.011428	0.05199
Tmtc2	1.07068	0.137096	0.0114904	0.0522366
mt-Tc	0.766724	4.12096	0.0115495	0.0524686
Slc22a21	0.771305	0.956516	0.0117333	0.0531717
Rab27a	0.537334	2.09517	0.0118917	0.0536629
Zbtb46	-0.996696	0.00247928	0.0122477	0.0549801
